# Supplementary material for: Inferring the Structure of Social Contacts from Demographic Data in the Analysis of Infectious Diseases Spread
Source: PLoS Comput Biol. 2012 Sep 13;8(9):e1002673. doi: 10.1371/journal.pcbi.1002673 (PMC3441445; doi:10.1371/journal.pcbi.1002673)
Supplement: Table S2 — Setting-specific contact matrices. Matrices of contacts in households, schools, workplaces and in the general community for 26 European countries. Please note that disease transmission models usually require the average frequencies of contacts by age; these can be obtained by dividing the symmetric matrices given in this table by the age structure of the population. (XLS) [file pcbi.1002673.s002.xls]

## Sheet: Austria
Household
2.77292	2.91792	3.01487	3.00572	2.98111	1.85564	1.79988	1.84597	1.91013	2.00519	1.16955	1.2769	1.19653	1.26924	1.26886	0.560422	0.58671	0.582938	0.596471	0.573319	2.22785	2.19675	2.36412	2.38782	2.32741	3.07772	3.13525	3.02892	2.79433	2.8917	2.91198	2.86426	3.03743	3.12297	3.20827	3.0031	3.09423	3.10323	3.37291	3.4376	2.78733	2.76913	2.84005	2.845	2.79886	0	0	0	0	0
2.91792	3.11512	3.14777	3.12657	3.02413	1.91303	1.92191	1.96761	1.98248	2.06656	1.19226	1.25323	1.28251	1.30326	1.33058	0.632591	0.60642	0.620402	0.607741	0.617454	2.29462	2.38268	2.46385	2.54123	2.43363	3.20834	3.26044	3.27907	3.06381	2.91764	2.94032	2.99384	3.15946	3.21812	3.28103	3.04516	3.17698	3.36109	3.56001	3.56169	2.89658	2.9622	2.89597	2.91867	2.9332	0	0	0	0	0
3.01487	3.14777	3.15652	3.2608	3.08206	1.92746	1.8869	1.93472	1.98421	2.08365	1.18778	1.28381	1.28522	1.29296	1.4057	0.608094	0.645157	0.627592	0.611654	0.59739	2.35481	2.37216	2.39298	2.47574	2.54717	3.26351	3.36418	3.18759	3.02727	2.97634	3.01079	3.01451	3.19075	3.27855	3.29597	3.15267	3.22722	3.41895	3.59493	3.71034	2.94791	2.96691	2.91794	3.01925	2.95776	0	0	0	0	0
3.00572	3.12657	3.2608	3.22541	3.18123	2.04701	1.96299	1.99465	2.05963	2.10584	1.28369	1.29616	1.30906	1.36548	1.38924	0.629809	0.64926	0.642729	0.595434	0.656993	2.41014	2.45133	2.53527	2.48116	2.55804	3.33165	3.40851	3.28638	3.12676	3.02916	3.1138	3.08138	3.19964	3.30604	3.38328	3.19044	3.24519	3.40695	3.66281	3.80017	2.98099	3.0736	2.99381	3.05153	3.11054	0	0	0	0	0
2.98111	3.02413	3.08206	3.18123	3.09361	2.03089	1.89831	1.99835	2.00667	2.07493	1.24842	1.27869	1.26506	1.29588	1.35963	0.636787	0.622547	0.644615	0.576973	0.641126	2.33081	2.38199	2.46663	2.40302	2.43195	3.28803	3.22862	3.15317	3.0723	2.94781	2.99843	3.05497	3.23015	3.31705	3.29946	3.11519	3.29883	3.29961	3.5453	3.66382	2.84335	2.88057	2.93105	2.97453	3.01145	0	0	0	0	0
1.85564	1.91303	1.92746	2.04701	2.03089	2.86091	2.76347	2.88376	2.82392	2.96646	2.05185	2.17369	2.16032	2.23273	2.32447	1.15208	1.20009	1.15854	1.13428	1.17168	0.36273	0.366408	0.375084	0.415165	0.375061	2.82882	2.82908	2.84622	2.7398	2.58341	3.0322	3.08411	3.26426	3.38286	3.35869	2.99037	3.13013	3.15798	3.3672	3.47563	2.9294	3.10493	3.07225	3.05488	3.02746	2.66732	2.59685	2.52697	2.49273	2.39557
1.79988	1.92191	1.8869	1.96299	1.89831	2.76347	2.71021	2.81232	2.81694	2.90073	2.00493	2.14193	2.06455	2.18972	2.2776	1.10792	1.16354	1.07546	1.1352	1.1008	0.362919	0.376027	0.371713	0.382511	0.362188	2.76326	2.78931	2.69333	2.6494	2.55613	2.97106	2.96378	3.17246	3.27028	3.20714	2.85266	3.04766	3.00586	3.29102	3.43894	2.85959	2.941	2.98254	2.95567	2.99271	2.60569	2.60373	2.43881	2.34333	2.17298
1.84597	1.96761	1.93472	1.99465	1.99835	2.88376	2.81232	2.96253	2.84882	3.01972	2.0564	2.18256	2.19621	2.27972	2.33838	1.13468	1.18735	1.19653	1.15661	1.13577	0.372019	0.401019	0.365017	0.369402	0.384892	2.94671	2.90274	2.83809	2.69208	2.67116	3.03491	3.13577	3.30187	3.40146	3.39764	3.00824	3.13039	3.10939	3.37041	3.45149	3.0583	3.04945	3.06744	3.02366	3.02861	2.71728	2.6623	2.60602	2.46741	2.33477
1.91013	1.98248	1.98421	2.05963	2.00667	2.82392	2.81694	2.84882	2.89269	3.02555	2.07618	2.2075	2.17968	2.2863	2.34458	1.13869	1.20567	1.16474	1.19322	1.18636	0.374731	0.374471	0.379611	0.391871	0.378196	3.00706	2.93242	2.8653	2.65235	2.66494	3.09791	3.15121	3.2401	3.45719	3.36081	3.08923	3.06146	3.2259	3.43428	3.50859	3.01932	3.05922	3.139	3.11073	3.0856	2.69335	2.61628	2.5559	2.50452	2.33477
2.00519	2.06656	2.08365	2.10584	2.07493	2.96646	2.90073	3.01972	3.02555	3.14195	2.1748	2.22004	2.21689	2.34809	2.47911	1.24069	1.21317	1.1932	1.18919	1.168	0.380861	0.386896	0.405923	0.381922	0.43049	2.92016	3.06961	3.03429	2.84766	2.71669	3.17828	3.25851	3.40688	3.48539	3.49899	3.07364	3.17271	3.35478	3.5664	3.622	3.2123	3.11696	3.20127	3.1729	3.18042	2.83047	2.72829	2.69229	2.45605	2.44438
1.16955	1.19226	1.18778	1.28369	1.24842	2.05185	2.00493	2.0564	2.07618	2.1748	3.00468	3.15461	3.14313	3.25686	3.26525	2.08919	2.05909	2.01757	2.06837	2.04833	0.695494	0.734042	0.740101	0.746231	0.8097	0.190925	0.206911	0.210329	0.177887	0.18423	3.30027	3.36237	3.55827	3.6795	3.61539	3.41973	3.61002	3.72031	3.88495	4.01728	3.25384	3.32252	3.28346	3.37859	3.2633	3.48063	3.29536	3.23581	3.07631	2.97538
1.2769	1.25323	1.28381	1.29616	1.27869	2.17369	2.14193	2.18256	2.2075	2.22004	3.15461	3.33938	3.21753	3.43597	3.48699	2.23044	2.22962	2.15853	2.12265	2.21269	0.728549	0.758232	0.800599	0.805763	0.783671	0.227729	0.219076	0.213583	0.213135	0.207005	3.50892	3.53134	3.67688	3.81797	3.88085	3.63317	3.84614	3.8692	4.12857	4.22339	3.41546	3.48584	3.46615	3.51694	3.48544	3.68596	3.50305	3.40773	3.29013	3.14426
1.19653	1.28251	1.28522	1.30906	1.26506	2.16032	2.06455	2.19621	2.17968	2.21689	3.14313	3.21753	3.30533	3.43713	3.50305	2.12574	2.24579	2.16103	2.14519	2.15556	0.761485	0.778791	0.758892	0.771411	0.766059	0.233647	0.198847	0.217449	0.197763	0.196301	3.35949	3.46809	3.62294	3.81606	3.76124	3.63385	3.76218	3.86102	4.08962	4.18209	3.28178	3.47414	3.44173	3.47844	3.47792	3.58286	3.48546	3.38538	3.23243	3.11005
1.26924	1.30326	1.29296	1.36548	1.29588	2.23273	2.18972	2.27972	2.2863	2.34809	3.25686	3.43597	3.43713	3.49947	3.61193	2.27686	2.34243	2.28141	2.22686	2.26222	0.768794	0.787726	0.814345	0.801472	0.804018	0.208608	0.216247	0.195971	0.209598	0.202195	3.62622	3.60618	3.89153	4.06383	3.99574	3.72611	3.91951	4.02165	4.31824	4.42823	3.54957	3.60304	3.54747	3.588	3.59012	3.71666	3.57821	3.588	3.35652	3.27039
1.26886	1.33058	1.4057	1.38924	1.35963	2.32447	2.2776	2.33838	2.34458	2.47911	3.26525	3.48699	3.50305	3.61193	3.78866	2.30744	2.34828	2.31018	2.35196	2.32602	0.790461	0.823163	0.813449	0.813873	0.824954	0.210306	0.20295	0.220962	0.219312	0.20908	3.73465	3.7581	3.91678	4.06651	4.09693	3.83008	3.96549	4.04525	4.37938	4.47873	3.68188	3.66542	3.73561	3.79194	3.63362	3.89063	3.78112	3.6542	3.50805	3.33266
0.560422	0.632591	0.608094	0.629809	0.636787	1.15208	1.10792	1.13468	1.13869	1.24069	2.08919	2.23044	2.12574	2.27686	2.30744	3.80257	4.00055	3.86708	3.78203	3.86271	1.95301	1.95907	2.02341	2.0854	2.11805	1.05961	0.987069	0.98108	1.00763	0.947318	0.504262	0.535855	0.554127	0.563911	0.550072	4.0162	4.21693	4.3045	4.58942	4.69394	4.19727	4.2966	4.2377	4.2299	4.2337	3.91298	3.70515	3.62655	3.52151	3.28265
0.58671	0.60642	0.645157	0.64926	0.622547	1.20009	1.16354	1.18735	1.20567	1.21317	2.05909	2.22962	2.24579	2.34243	2.34828	4.00055	4.00514	3.95188	3.96723	3.98034	2.04029	2.01893	2.09735	2.14248	2.11829	0.956419	1.0118	0.990629	0.96203	0.959979	0.553184	0.554787	0.531658	0.578977	0.590765	4.1484	4.30188	4.35243	4.66447	4.82701	4.14021	4.24325	4.2166	4.33814	4.25937	3.87198	3.79326	3.54959	3.50451	3.42416
0.582938	0.620402	0.627592	0.642729	0.644615	1.15854	1.07546	1.19653	1.16474	1.1932	2.01757	2.15853	2.16103	2.28141	2.31018	3.86708	3.95188	3.78512	3.84508	3.88438	1.89909	2.00085	2.02895	2.09233	2.12812	0.984735	0.992492	1.00254	0.937699	0.885971	0.508411	0.524915	0.546111	0.528829	0.57214	4.10997	4.1856	4.37759	4.61199	4.74935	4.17692	4.16726	4.17985	4.26894	4.21135	3.86026	3.70871	3.63779	3.50956	3.28223
0.596471	0.607741	0.611654	0.595434	0.576973	1.13428	1.1352	1.15661	1.19322	1.18919	2.06837	2.12265	2.14519	2.22686	2.35196	3.78203	3.96723	3.84508	3.78215	3.85192	1.94358	1.99588	2.01236	2.05352	2.07144	0.983792	1.00098	1.03083	0.926689	0.917211	0.542268	0.539179	0.557381	0.569004	0.620024	4.03009	4.19437	4.28771	4.61677	4.76594	4.10954	4.19185	4.20639	4.15493	4.1952	3.8448	3.66144	3.58451	3.46594	3.26598
0.573319	0.617454	0.59739	0.656993	0.641126	1.17168	1.1008	1.13577	1.18636	1.168	2.04833	2.21269	2.15556	2.26222	2.32602	3.86271	3.98034	3.88438	3.85192	3.89061	1.99147	2.03761	2.11937	2.10341	2.15528	0.993293	1.02067	1.01645	0.959767	0.871684	0.460833	0.518809	0.554386	0.540853	0.602342	3.98293	4.21913	4.39989	4.6615	4.73633	4.22151	4.13295	4.31334	4.18999	4.26909	3.90956	3.76716	3.68801	3.44149	3.34402
2.22785	2.29462	2.35481	2.41014	2.33081	0.36273	0.362919	0.372019	0.374731	0.380861	0.695494	0.728549	0.761485	0.768794	0.790461	1.95301	2.04029	1.89909	1.94358	1.99147	3.50937	3.54789	3.51953	3.6224	3.65903	2.0911	2.03336	2.0025	1.92005	1.86359	1.13721	1.13009	1.21166	1.1849	1.27461	0.993199	1.04868	0.995203	1.05792	1.15477	3.20626	3.35586	3.26641	3.26151	3.23281	3.1816	3.15256	3.04764	2.91726	2.76278
2.19675	2.38268	2.37216	2.45133	2.38199	0.366408	0.376027	0.401019	0.374471	0.386896	0.734042	0.758232	0.778791	0.787726	0.823163	1.95907	2.01893	2.00085	1.99588	2.03761	3.54789	3.469	3.46735	3.53717	3.58048	2.14434	2.10737	2.12993	1.97998	1.93837	1.16158	1.18196	1.17236	1.23826	1.26009	0.92169	0.974078	1.06178	1.05318	1.11504	3.28475	3.3196	3.2818	3.25738	3.30175	3.29678	3.197	3.16041	3.06836	2.89281
2.36412	2.46385	2.39298	2.53527	2.46663	0.375084	0.371713	0.365017	0.379611	0.405923	0.740101	0.800599	0.758892	0.814345	0.813449	2.02341	2.09735	2.02895	2.01236	2.11937	3.51953	3.46735	3.59745	3.71875	3.81386	2.18895	2.18128	2.0589	2.01596	1.93781	1.09665	1.12212	1.21928	1.29942	1.32679	0.964836	1.05747	1.08673	1.11542	1.1204	3.3536	3.29175	3.39172	3.35265	3.33756	3.25082	3.23632	3.1087	3.0284	2.88043
2.38782	2.54123	2.47574	2.48116	2.40302	0.415165	0.382511	0.369402	0.391871	0.381922	0.746231	0.805763	0.771411	0.801472	0.813873	2.0854	2.14248	2.09233	2.05352	2.10341	3.6224	3.53717	3.71875	3.79564	3.82433	2.25807	2.22808	2.17968	2.03539	2.00342	1.18372	1.27532	1.23076	1.23453	1.36043	1.00652	1.07562	1.07204	1.08423	1.16649	3.40591	3.39686	3.40943	3.35857	3.49211	3.41806	3.29913	3.26606	3.09119	2.98978
2.32741	2.43363	2.54717	2.55804	2.43195	0.375061	0.362188	0.384892	0.378196	0.43049	0.8097	0.783671	0.766059	0.804018	0.824954	2.11805	2.11829	2.12812	2.07144	2.15528	3.65903	3.58048	3.81386	3.82433	3.75994	2.21681	2.17501	2.28125	2.0154	2.01203	1.17408	1.19575	1.23835	1.42293	1.27419	1.03851	1.01838	1.08378	1.11818	1.20433	3.42848	3.44312	3.48376	3.4604	3.48025	3.42475	3.41183	3.30085	3.11606	2.98933
3.07772	3.20834	3.26351	3.33165	3.28803	2.82882	2.76326	2.94671	3.00706	2.92016	0.190925	0.227729	0.233647	0.208608	0.210306	1.05961	0.956419	0.984735	0.983792	0.993293	2.0911	2.14434	2.18895	2.25807	2.21681	3.00355	3.01282	2.9651	2.90323	2.78851	1.89709	1.93623	1.98536	2.03407	2.10282	1.65995	1.70638	1.73816	1.85236	1.82152	1.71258	1.78515	1.74888	1.78373	1.8104	2.38867	2.355	2.27545	2.16641	2.04763
3.13525	3.26044	3.36418	3.40851	3.22862	2.82908	2.78931	2.90274	2.93242	3.06961	0.206911	0.219076	0.198847	0.216247	0.20295	0.987069	1.0118	0.992492	1.00098	1.02067	2.03336	2.10737	2.18128	2.22808	2.17501	3.01282	3.13261	2.9468	2.81307	2.83245	1.87255	1.8488	2.03544	2.06026	2.03556	1.6381	1.76388	1.71107	1.78324	1.92713	1.79288	1.80021	1.78239	1.88994	1.76937	2.52746	2.32168	2.28641	2.26453	2.0969
3.02892	3.27907	3.18759	3.28638	3.15317	2.84622	2.69333	2.83809	2.8653	3.03429	0.210329	0.213583	0.217449	0.195971	0.220962	0.98108	0.990629	1.00254	1.03083	1.01645	2.0025	2.12993	2.0589	2.17968	2.28125	2.9651	2.9468	3.02071	2.80558	2.76764	1.82395	1.8575	1.95898	1.97322	2.06632	1.56885	1.60136	1.75209	1.79191	1.86191	1.71986	1.75546	1.77102	1.7349	1.78411	2.41512	2.30511	2.28832	2.11836	2.0489
2.79433	3.06381	3.02727	3.12676	3.0723	2.7398	2.6494	2.69208	2.65235	2.84766	0.177887	0.213135	0.197763	0.209598	0.219312	1.00763	0.96203	0.937699	0.926689	0.959767	1.92005	1.97998	2.01596	2.03539	2.0154	2.90323	2.81307	2.80558	2.6564	2.61406	1.7545	1.76353	1.94391	1.94363	1.87344	1.54603	1.60693	1.50305	1.81995	1.8012	1.63001	1.68964	1.70135	1.68148	1.7193	2.30723	2.22757	2.16728	2.00585	2.0452
2.8917	2.91764	2.97634	3.02916	2.94781	2.58341	2.55613	2.67116	2.66494	2.71669	0.18423	0.207005	0.196301	0.202195	0.20908	0.947318	0.959979	0.885971	0.917211	0.871684	1.86359	1.93837	1.93781	2.00342	2.01203	2.78851	2.83245	2.76764	2.61406	2.63141	1.69435	1.77461	1.83567	1.87066	1.86241	1.48258	1.57406	1.46134	1.7168	1.80738	1.70352	1.64234	1.69508	1.69659	1.68492	2.20925	2.14005	2.07738	1.98017	1.9711
2.91198	2.94032	3.01079	3.1138	2.99843	3.0322	2.97106	3.03491	3.09791	3.17828	3.30027	3.50892	3.35949	3.62622	3.73465	0.504262	0.553184	0.508411	0.542268	0.460833	1.13721	1.16158	1.09665	1.18372	1.17408	1.89709	1.87255	1.82395	1.7545	1.69435	1.71706	1.77916	1.89042	1.88011	1.952	1.63883	1.7954	1.83494	1.92944	1.96905	1.7246	1.7929	1.78144	1.82096	1.80052	1.70362	1.72448	1.70067	1.57583	1.51368
2.86426	2.99384	3.01451	3.08138	3.05497	3.08411	2.96378	3.13577	3.15121	3.25851	3.36237	3.53134	3.46809	3.60618	3.7581	0.535855	0.554787	0.524915	0.539179	0.518809	1.13009	1.18196	1.12212	1.27532	1.19575	1.93623	1.8488	1.8575	1.76353	1.77461	1.77916	1.86851	1.95391	1.9549	1.98411	1.67806	1.78988	1.8389	1.93967	1.97994	1.79257	1.82207	1.84909	1.76683	1.86321	1.81563	1.80504	1.69598	1.69746	1.54641
3.03743	3.15946	3.19075	3.19964	3.23015	3.26426	3.17246	3.30187	3.2401	3.40688	3.55827	3.67688	3.62294	3.89153	3.91678	0.554127	0.531658	0.546111	0.557381	0.554386	1.21166	1.17236	1.21928	1.23076	1.23835	1.98536	2.03544	1.95898	1.94391	1.83567	1.89042	1.95391	2.04888	2.06389	2.07307	1.8082	1.80559	1.89919	2.04763	2.1169	1.8791	1.86573	1.86361	1.91661	1.94587	1.95969	1.85581	1.80097	1.68124	1.65408
3.12297	3.21812	3.27855	3.30604	3.31705	3.38286	3.27028	3.40146	3.45719	3.48539	3.6795	3.81797	3.81606	4.06383	4.06651	0.563911	0.578977	0.528829	0.569004	0.540853	1.1849	1.23826	1.29942	1.23453	1.42293	2.03407	2.06026	1.97322	1.94363	1.87066	1.88011	1.9549	2.06389	2.10857	2.13517	1.86472	1.86434	1.91699	2.00585	2.1151	1.89584	1.95643	1.87846	1.97732	1.97183	1.9396	1.97515	1.82973	1.754	1.72932
3.20827	3.28103	3.29597	3.38328	3.29946	3.35869	3.20714	3.39764	3.36081	3.49899	3.61539	3.88085	3.76124	3.99574	4.09693	0.550072	0.590765	0.57214	0.620024	0.602342	1.27461	1.26009	1.32679	1.36043	1.27419	2.10282	2.03556	2.06632	1.87344	1.86241	1.952	1.98411	2.07307	2.13517	2.20241	1.88879	1.92474	2.01469	2.09523	2.18888	1.85203	1.95928	1.89855	1.92359	1.93326	2.04275	1.81763	1.84395	1.73457	1.68782
3.0031	3.04516	3.15267	3.19044	3.11519	2.99037	2.85266	3.00824	3.08923	3.07364	3.41973	3.63317	3.63385	3.72611	3.83008	4.0162	4.1484	4.10997	4.03009	3.98293	0.993199	0.92169	0.964836	1.00652	1.03851	1.65995	1.6381	1.56885	1.54603	1.48258	1.63883	1.67806	1.8082	1.86472	1.88879	2.22933	2.23789	2.33286	2.50898	2.52143	2.18723	2.15139	2.2792	2.23174	2.13503	1.99033	1.97404	1.93382	1.85805	1.81789
3.09423	3.17698	3.22722	3.24519	3.29883	3.13013	3.04766	3.13039	3.06146	3.17271	3.61002	3.84614	3.76218	3.91951	3.96549	4.21693	4.30188	4.1856	4.19437	4.21913	1.04868	0.974078	1.05747	1.07562	1.01838	1.70638	1.76388	1.60136	1.60693	1.57406	1.7954	1.78988	1.80559	1.86434	1.92474	2.23789	2.28304	2.41682	2.57877	2.65431	2.24331	2.33097	2.29865	2.38588	2.29389	2.20988	2.07448	1.94181	1.87066	1.80122
3.10323	3.36109	3.41895	3.40695	3.29961	3.15798	3.00586	3.10939	3.2259	3.35478	3.72031	3.8692	3.86102	4.02165	4.04525	4.3045	4.35243	4.37759	4.28771	4.39989	0.995203	1.06178	1.08673	1.07204	1.08378	1.73816	1.71107	1.75209	1.50305	1.46134	1.83494	1.8389	1.89919	1.91699	2.01469	2.33286	2.41682	2.49971	2.63297	2.72251	2.31706	2.41182	2.40126	2.36749	2.37294	2.17871	2.10152	2.06974	2.04503	1.91607
3.37291	3.56001	3.59493	3.66281	3.5453	3.3672	3.29102	3.37041	3.43428	3.5664	3.88495	4.12857	4.08962	4.31824	4.37938	4.58942	4.66447	4.61199	4.61677	4.6615	1.05792	1.05318	1.11542	1.08423	1.11818	1.85236	1.78324	1.79191	1.81995	1.7168	1.92944	1.93967	2.04763	2.00585	2.09523	2.50898	2.57877	2.63297	2.77792	2.88581	2.5119	2.48917	2.53265	2.48917	2.54632	2.30388	2.21281	2.23827	2.15679	2.02502
3.4376	3.56169	3.71034	3.80017	3.66382	3.47563	3.43894	3.45149	3.50859	3.622	4.01728	4.22339	4.18209	4.42823	4.47873	4.69394	4.82701	4.74935	4.76594	4.73633	1.15477	1.11504	1.1204	1.16649	1.20433	1.82152	1.92713	1.86191	1.8012	1.80738	1.96905	1.97994	2.1169	2.1151	2.18888	2.52143	2.65431	2.72251	2.88581	2.97455	2.57459	2.60793	2.54828	2.67765	2.58982	2.40371	2.33161	2.2555	2.09917	2.08266
2.78733	2.89658	2.94791	2.98099	2.84335	2.9294	2.85959	3.0583	3.01932	3.2123	3.25384	3.41546	3.28178	3.54957	3.68188	4.19727	4.14021	4.17692	4.10954	4.22151	3.20626	3.28475	3.3536	3.40591	3.42848	1.71258	1.79288	1.71986	1.63001	1.70352	1.7246	1.79257	1.8791	1.89584	1.85203	2.18723	2.24331	2.31706	2.5119	2.57459	2.81758	2.93961	2.83323	2.85181	2.81428	2.58464	2.5828	2.43176	2.35266	2.24471
2.76913	2.9622	2.96691	3.0736	2.88057	3.10493	2.941	3.04945	3.05922	3.11696	3.32252	3.48584	3.47414	3.60304	3.66542	4.2966	4.24325	4.16726	4.19185	4.13295	3.35586	3.3196	3.29175	3.39686	3.44312	1.78515	1.80021	1.75546	1.68964	1.64234	1.7929	1.82207	1.86573	1.95643	1.95928	2.15139	2.33097	2.41182	2.48917	2.60793	2.93961	2.91236	2.86334	2.92829	2.86695	2.60826	2.56332	2.53164	2.37912	2.23259
2.84005	2.89597	2.91794	2.99381	2.93105	3.07225	2.98254	3.06744	3.139	3.20127	3.28346	3.46615	3.44173	3.54747	3.73561	4.2377	4.2166	4.17985	4.20639	4.31334	3.26641	3.2818	3.39172	3.40943	3.48376	1.74888	1.78239	1.77102	1.70135	1.69508	1.78144	1.84909	1.86361	1.87846	1.89855	2.2792	2.29865	2.40126	2.53265	2.54828	2.83323	2.86334	2.86572	2.91851	2.91959	2.64205	2.48627	2.55686	2.43198	2.34675
2.845	2.91867	3.01925	3.05153	2.97453	3.05488	2.95567	3.02366	3.11073	3.1729	3.37859	3.51694	3.47844	3.588	3.79194	4.2299	4.33814	4.26894	4.15493	4.18999	3.26151	3.25738	3.35265	3.35857	3.4604	1.78373	1.88994	1.7349	1.68148	1.69659	1.82096	1.76683	1.91661	1.97732	1.92359	2.23174	2.38588	2.36749	2.48917	2.67765	2.85181	2.92829	2.91851	2.95314	2.90575	2.58042	2.63007	2.48505	2.38506	2.31027
2.79886	2.9332	2.95776	3.11054	3.01145	3.02746	2.99271	3.02861	3.0856	3.18042	3.2633	3.48544	3.47792	3.59012	3.63362	4.2337	4.25937	4.21135	4.1952	4.26909	3.23281	3.30175	3.33756	3.49211	3.48025	1.8104	1.76937	1.78411	1.7193	1.68492	1.80052	1.86321	1.94587	1.97183	1.93326	2.13503	2.29389	2.37294	2.54632	2.58982	2.81428	2.86695	2.91959	2.90575	2.90938	2.65419	2.56646	2.46866	2.30846	2.27738
0	0	0	0	0	2.66732	2.60569	2.71728	2.69335	2.83047	3.48063	3.68596	3.58286	3.71666	3.89063	3.91298	3.87198	3.86026	3.8448	3.90956	3.1816	3.29678	3.25082	3.41806	3.42475	2.38867	2.52746	2.41512	2.30723	2.20925	1.70362	1.81563	1.95969	1.9396	2.04275	1.99033	2.20988	2.17871	2.30388	2.40371	2.58464	2.60826	2.64205	2.58042	2.65419	3.00737	2.73159	2.90634	2.68882	2.42941
0	0	0	0	0	2.59685	2.60373	2.6623	2.61628	2.72829	3.29536	3.50305	3.48546	3.57821	3.78112	3.70515	3.79326	3.70871	3.66144	3.76716	3.15256	3.197	3.23632	3.29913	3.41183	2.355	2.32168	2.30511	2.22757	2.14005	1.72448	1.80504	1.85581	1.97515	1.81763	1.97404	2.07448	2.10152	2.21281	2.33161	2.5828	2.56332	2.48627	2.63007	2.56646	2.73159	2.90406	2.65398	2.596	2.50462
0	0	0	0	0	2.52697	2.43881	2.60602	2.5559	2.69229	3.23581	3.40773	3.38538	3.588	3.6542	3.62655	3.54959	3.63779	3.58451	3.68801	3.04764	3.16041	3.1087	3.26606	3.30085	2.27545	2.28641	2.28832	2.16728	2.07738	1.70067	1.69598	1.80097	1.82973	1.84395	1.93382	1.94181	2.06974	2.23827	2.2555	2.43176	2.53164	2.55686	2.48505	2.46866	2.90634	2.65398	2.5878	2.51872	2.43891
0	0	0	0	0	2.49273	2.34333	2.46741	2.50452	2.45605	3.07631	3.29013	3.23243	3.35652	3.50805	3.52151	3.50451	3.50956	3.46594	3.44149	2.91726	3.06836	3.0284	3.09119	3.11606	2.16641	2.26453	2.11836	2.00585	1.98017	1.57583	1.69746	1.68124	1.754	1.73457	1.85805	1.87066	2.04503	2.15679	2.09917	2.35266	2.37912	2.43198	2.38506	2.30846	2.68882	2.596	2.51872	2.37603	2.24654
0	0	0	0	0	2.39557	2.17298	2.33477	2.33477	2.44438	2.97538	3.14426	3.11005	3.27039	3.33266	3.28265	3.42416	3.28223	3.26598	3.34402	2.76278	2.89281	2.88043	2.98978	2.98933	2.04763	2.0969	2.0489	2.0452	1.9711	1.51368	1.54641	1.65408	1.72932	1.68782	1.81789	1.80122	1.91607	2.02502	2.08266	2.24471	2.23259	2.34675	2.31027	2.27738	2.42941	2.50462	2.43891	2.24654	2.26795
0	0	0	0	0	0	0	0	0	0	2.09341	2.256	2.19453	2.28226	2.37171	3.11427	3.13692	3.10264	3.10371	3.08562	2.29749	2.41347	2.36827	2.55382	2.50155	2.26005	2.27418	2.19774	2.07156	2.10817	1.73137	1.76782	1.80618	1.74372	1.74646	1.75103	1.70772	1.81561	1.95591	1.9611	2.10065	2.01511	2.03829	2.07832	2.12696	2.4108	2.41382	2.19722	2.26472	2.14043
0	0	0	0	0	0	0	0	0	0	2.08476	2.23693	2.22389	2.25642	2.30353	3.01678	3.14048	3.01449	3.00671	3.11111	2.24421	2.35688	2.34547	2.44662	2.47109	2.14439	2.21561	2.19048	2.01898	1.94669	1.63833	1.68004	1.70663	1.81358	1.84673	1.69395	1.73552	1.75204	1.92708	2.00495	2.03494	2.05501	2.06333	2.155	2.0754	2.45409	2.32317	2.2647	2.26225	2.04777
0	0	0	0	0	0	0	0	0	0	1.95414	2.07252	2.06022	2.077	2.11657	2.80506	2.88142	2.7667	2.80336	2.74065	2.14257	2.19923	2.16688	2.29823	2.28564	2.10739	2.08841	2.0672	1.91793	1.95113	1.53195	1.62176	1.63727	1.72392	1.74004	1.55577	1.61622	1.61572	1.73875	1.81945	1.93533	1.91621	1.91454	1.94158	1.99545	2.22601	2.13503	2.13147	2.0302	2.01577
0	0	0	0	0	0	0	0	0	0	1.80978	1.97654	1.91479	1.99397	2.07648	2.71568	2.79155	2.65483	2.62484	2.65457	2.00967	2.06083	2.04381	2.077	2.15679	1.92979	1.98039	1.89235	1.80448	1.76202	1.42546	1.4666	1.53351	1.59729	1.53184	1.46141	1.51083	1.55975	1.72979	1.74056	1.81344	1.79382	1.8459	1.86139	1.81773	2.13882	1.98923	1.98668	1.86705	1.79689
0	0	0	0	0	0	0	0	0	0	1.80229	1.86854	1.90668	1.95631	1.94827	2.62333	2.73037	2.67659	2.59492	2.61338	1.97072	1.99899	2.01731	2.11661	2.13026	1.85034	1.88167	1.83197	1.7963	1.76067	1.47089	1.40219	1.48065	1.54171	1.5681	1.40372	1.51764	1.55746	1.71545	1.73417	1.68362	1.85951	1.7747	1.80764	1.75252	2.03702	2.04103	1.94743	1.85644	1.79988
0	0	0	0	0	0	0	0	0	0	0	0	0	0	0	1.72776	1.81808	1.68563	1.7578	1.71581	1.87238	1.89079	1.90338	2.01038	1.96353	1.50302	1.56963	1.4981	1.39561	1.33598	1.17682	1.19926	1.23866	1.31757	1.28515	1.24891	1.30135	1.37687	1.5129	1.4169	1.8439	1.81532	1.82518	1.82749	1.8638	2.215	2.13672	2.02318	2.02231	1.88
0.000707306	0	0.000943075	0	0	0	0	0	0	0	0	0	0.000707306	0.00141461	0	1.69841	1.67613	1.64326	1.64074	1.62562	1.68164	1.75869	1.80754	1.88054	1.92307	1.49859	1.46172	1.47603	1.38139	1.34631	1.1489	1.14145	1.15538	1.23208	1.28251	1.20424	1.21704	1.28612	1.36503	1.31915	1.74811	1.73945	1.82433	1.68353	1.72217	2.03343	2.05604	1.90902	1.84199	1.77779
0	0	0.000471537	0	0.000707306	0	0	0.000707306	0	0.000707306	0	0	0	0	0.000707306	1.68091	1.79613	1.66269	1.65059	1.70654	1.76631	1.834	1.80292	1.9913	1.98812	1.49399	1.53806	1.42334	1.44835	1.40032	1.14753	1.18816	1.26855	1.23123	1.32415	1.2488	1.2516	1.30505	1.37425	1.44576	1.76579	1.78338	1.82211	1.76105	1.84013	2.24621	2.02645	2.01304	1.84246	1.80387
0	0	0	0	0	0	0	0	0	0	0.000707306	0	0	0.000707306	0	1.73872	1.72267	1.73434	1.72854	1.76268	1.81278	1.78354	1.83268	1.9313	1.97774	1.51899	1.50658	1.46094	1.47563	1.39033	1.25302	1.19582	1.24248	1.28723	1.3167	1.22821	1.26983	1.28086	1.40862	1.42253	1.7963	1.74525	1.78654	1.84977	1.74212	2.1811	2.14667	2.02754	1.90357	1.84079
0	0	0.000471537	0	0	0	0	0	0	0	0.000707306	0.000707306	0	0	0	1.74688	1.83154	1.72276	1.77279	1.75695	1.86967	1.87903	1.91553	2.02337	2.03572	1.48235	1.57326	1.52693	1.45679	1.42734	1.23555	1.19556	1.27251	1.29079	1.31936	1.28746	1.34636	1.37458	1.4401	1.47249	1.88391	1.88999	1.90324	1.94608	1.84758	2.20142	2.22238	2.05696	2.04011	1.98802
0	0	0	0	0	0	0.000707306	0	0	0	0	0	0	0	0	0.00141461	0	0.000707306	0	0	1.51587	1.65399	1.60186	1.70055	1.72939	1.79915	1.78762	1.77046	1.6641	1.63449	1.12007	1.17927	1.18198	1.27112	1.2604	1.10139	1.18933	1.30168	1.37229	1.35954	1.33553	1.3692	1.38705	1.36557	1.33513	2.35439	2.35222	2.28903	2.20293	1.99352
0	0	0.000707306	0	0	0.000707306	0	0	0	0	0	0	0	0.000707306	0	0	0	0	0	0	1.33714	1.33943	1.35506	1.40353	1.46469	1.51486	1.48364	1.38335	1.38285	1.32219	0.938689	0.904691	0.981245	1.01253	1.05403	1.0301	1.02505	1.0913	1.12143	1.13223	1.1377	1.10507	1.15034	1.14147	1.12561	2.00618	1.97414	1.90817	1.76812	1.77114
0	0	0	0	0	0	0	0	0	0	0	0	0	0.000707306	0	0	0	0	0	0	1.06836	1.13685	1.08652	1.08788	1.12115	1.24061	1.21789	1.15095	1.11752	1.17045	0.791782	0.793361	0.831438	0.787962	0.842354	0.841317	0.855038	0.882105	0.908747	0.939632	0.92268	0.885099	0.960356	0.976389	0.936591	1.61565	1.55669	1.60261	1.50338	1.43923
0	0	0	0	0	0	0	0	0	0	0.000707306	0	0	0	0	0	0	0	0	0	1.40572	1.41586	1.37246	1.47558	1.58	1.53511	1.55501	1.49546	1.44604	1.37887	0.987116	0.963115	1.04629	1.08649	1.08602	1.07289	1.08659	1.08534	1.14935	1.20666	1.1497	1.13676	1.25707	1.23753	1.16715	2.14516	2.03143	2.0104	2.00222	1.80785
0	0.000707306	0	0	0	0	0	0	0.00141461	0.00141461	0	0	0	0.000707306	0	0	0	0	0	0	1.35253	1.43215	1.3987	1.49855	1.45601	1.58352	1.51418	1.50798	1.49548	1.43519	0.952599	1.06431	1.12978	1.10644	1.05638	1.01668	1.03722	1.10451	1.15119	1.20504	1.19914	1.18172	1.14341	1.21126	1.17865	2.18088	2.08589	1.9284	1.86392	1.89664
0	0	0	0	0	0	0	0	0	0	0	0	0	0	0	0	0	0	0	0.000707306	0	0	0	0	0	1.19579	1.19278	1.21954	1.09868	1.1012	1.09887	1.08126	1.10377	1.20282	1.25551	0.891182	0.970117	0.99077	1.03733	1.03425	1.0967	1.12084	1.11073	1.12886	1.12129	1.11691	1.14742	1.07407	1.00921	1.04985
0.000707306	0	0	0	0	0	0	0	0	0	0.000471537	0	0	0	0	0	0	0	0	0	0.00141461	0	0	0	0	1.40678	1.34461	1.36866	1.29324	1.27178	1.26447	1.2715	1.3859	1.33933	1.38483	1.06905	1.11967	1.16689	1.267	1.32002	1.27284	1.30149	1.30415	1.33153	1.33025	1.30611	1.22463	1.27942	1.20266	1.15986
0	0	0	0	0	0	0	0	0	0	0.000471537	0	0	0	0	0	0	0.000707306	0	0	0	0	0	0	0	1.43387	1.51007	1.424	1.38028	1.36449	1.34829	1.32971	1.38585	1.44684	1.48261	1.11952	1.16491	1.20442	1.32818	1.32568	1.35135	1.33332	1.37965	1.42079	1.43411	1.39389	1.34077	1.36885	1.21494	1.14699
0	0	0	0	0	0	0	0	0	0	0	0	0	0	0	0	0	0	0	0	0	0	0	0	0	1.4103	1.40306	1.38625	1.3515	1.31703	1.33539	1.34518	1.34105	1.38623	1.34412	1.15376	1.15399	1.12905	1.25997	1.26431	1.30632	1.2727	1.27513	1.34438	1.34221	1.39724	1.34211	1.21723	1.16222	1.1965
0.00141461	0	0	0	0	0	0	0	0	0	0	0	0	0	0	0	0	0	0	0	0	0	0	0	0	0.918389	0.996099	0.928103	0.876729	0.920134	0.881397	0.908275	0.943145	0.971037	0.955452	0.768983	0.788057	0.781526	0.849097	0.901815	0.91009	0.907827	0.926382	0.897335	0.885948	0.933101	0.92551	0.858174	0.796568	0.771293
0	0	0	0	0	0	0	0	0	0	0	0	0	0	0	0	0	0	0	0	0	0	0	0	0	0	0	0	0	0	0.478988	0.518102	0.541867	0.546582	0.530951	0.681041	0.696814	0.694952	0.721617	0.734231	0.614484	0.632685	0.579449	0.63608	0.626461	0.629384	0.639805	0.61571	0.581429	0.56219
0	0	0	0	0.000707306	0	0	0	0	0	0	0	0	0	0	0	0	0	0	0.000707306	0	0	0	0	0	0	0	0	0	0	0.53833	0.50339	0.558088	0.521143	0.566057	0.619246	0.640937	0.702213	0.711455	0.740974	0.557687	0.613093	0.620614	0.605831	0.632473	0.626154	0.631129	0.589539	0.574214	0.547408
0	0	0	0	0	0	0	0	0	0	0	0	0	0	0	0.00141461	0	0	0	0	0	0	0	0	0	0	0	0	0	0	0.476205	0.519021	0.550142	0.562591	0.54406	0.595834	0.65546	0.701011	0.654541	0.707942	0.579802	0.553302	0.608825	0.585578	0.56542	0.585696	0.573083	0.595528	0.565302	0.514494
0	0	0	0	0	0	0	0	0	0	0	0	0	0	0	0	0	0	0	0	0	0	0	0	0	0	0	0	0	0	0.542032	0.448479	0.511524	0.504521	0.534535	0.587347	0.613824	0.641314	0.682644	0.651382	0.539203	0.565208	0.547573	0.597838	0.604299	0.644827	0.601634	0.565019	0.562355	0.54472
0	0	0	0	0	0	0	0	0	0	0	0	0	0	0	0	0	0	0	0	0	0	0	0	0	0	0	0	0	0.00141461	0.472598	0.477384	0.468142	0.493699	0.524467	0.632355	0.637825	0.702543	0.669323	0.695022	0.560375	0.555966	0.583952	0.591991	0.584117	0.582066	0.581853	0.556626	0.545804	0.513457
0	0	0	0	0	0	0	0	0	0	0	0	0	0	0	0	0	0	0	0	0	0	0	0	0	0	0	0	0	0	0	0	0	0	0	0.406111	0.419762	0.440274	0.487782	0.45501	0.557899	0.577892	0.584046	0.572635	0.572588	0.547761	0.494336	0.488088	0.484387	0.434215
0	0	0	0	0	0	0	0	0	0	0	0	0	0	0	0	0	0	0	0	0	0	0	0	0	0	0	0	0	0	0	0	0	0	0	0.398826	0.421955	0.442915	0.477549	0.480119	0.564124	0.564006	0.575841	0.605642	0.551981	0.501739	0.476064	0.47274	0.440133	0.446216
0	0	0	0	0	0	0	0	0	0	0	0	0	0	0	0	0	0	0	0	0	0	0	0	0	0	0	0	0	0	0	0	0	0	0	0.414976	0.441453	0.435394	0.44466	0.46892	0.569641	0.533214	0.564265	0.568957	0.600173	0.520907	0.471301	0.459537	0.482383	0.43563
0	0	0	0	0	0	0	0	0	0	0	0	0	0	0	0	0	0	0	0	0	0	0	0	0	0	0	0	0	0	0	0	0	0	0	0.365253	0.419267	0.411487	0.431834	0.469156	0.515697	0.527344	0.52607	0.521426	0.519233	0.401349	0.433437	0.42179	0.405145	0.41467
0	0	0	0	0	0	0	0	0	0	0	0	0	0	0	0	0	0	0	0	0	0	0	0	0	0	0	0	0	0	0	0	0	0	0	0.375131	0.413868	0.391989	0.408516	0.414316	0.498981	0.509732	0.504616	0.496434	0.501692	0.443056	0.402386	0.440039	0.38013	0.388122
0	0	0	0	0.00141461	0	0.000707306	0	0	0.000707306	0.000707306	0.00282922	0	0.00141461	0.000707306	0	0	0	0.00212192	0	0.00141461	0	0	0	0	0.00141461	0	0	0	0	0	0.00117884	0.00141461	0	0	0.000471537	0.00141461	0	0.000707306	0	0.392177	0.382605	0.40722	0.389678	0.405121	0.47406	0.446145	0.441217	0.469604	0.422002
0	0.00141461	0.00141461	0	0.000707306	0.00141461	0	0	0	0	0	0	0	0	0	0.000707306	0	0.000707306	0	0	0	0	0.000707306	0	0.00141461	0	0	0	0	0	0	0	0	0	0	0.00141461	0.00141461	0	0	0.00141461	0.375485	0.393121	0.366762	0.406819	0.392508	0.482335	0.463097	0.444966	0.397742	0.404744
0	0.00212192	0.00117884	0	0	0	0	0.00141461	0	0	0	0	0.00141461	0	0	0	0	0	0	0	0.000707306	0	0	0	0.00141461	0	0.00282922	0	0	0.000707306	0	0	0.00141461	0	0	0	0	0	0	0.00212192	0.355421	0.371005	0.385741	0.37308	0.388358	0.468897	0.426576	0.432777	0.394842	0.395879
0	0	0	0	0	0.000707306	0	0	0	0	0	0	0	0	0	0	0	0	0	0.00282922	0	0.00141461	0.00282922	0	0.000707306	0	0	0	0.00141461	0	0	0	0	0	0	0	0	0	0.00282922	0	0.357732	0.352097	0.332151	0.315788	0.329463	0.426482	0.380743	0.371029	0.396303	0.361834
0	0	0.000471537	0.00141461	0	0	0	0	0	0.00141461	0	0.000707306	0.000707306	0.00141461	0	0	0	0	0	0	0.00282922	0	0.000707306	0	0	0.000471537	0	0.00141461	0.00141461	0	0	0	0	0	0	0	0	0.00282922	0.000707306	0	0.312393	0.336395	0.300063	0.300841	0.308385	0.36761	0.393262	0.356081	0.367139	0.343727
0	0.00141461	0	0	0	0.00141461	0	0.00141461	0	0	0	0	0	0	0	0.000707306	0	0	0	0	0.00141461	0	0	0	0	0.000471537	0	0	0	0	0	0	0	0	0	0	0	0	0	0	0	0	0.00141461	0	0.00282922	0.340214	0.336678	0.341629	0.291646	0.292825
0	0	0	0	0.00141461	0	0	0.00141461	0.00282922	0	0.000707306	0	0	0.000707306	0	0	0	0	0	0	0.00141461	0	0.00212192	0.000707306	0.000471537	0.00282922	0	0.000707306	0	0.000707306	0	0	0	0.00141461	0	0.000707306	0	0	0	0	0	0.00141461	0	0	0	0.289995	0.244964	0.289052	0.266654	0.23459
0	0	0	0	0	0	0	0	0.000707306	0	0.000707306	0	0	0	0.00141461	0	0	0	0.00141461	0	0	0	0	0.000707306	0	0	0.000707306	0	0	0	0.00141461	0	0	0	0	0	0	0	0	0.000471537	0	0	0	0	0	0.26689	0.25463	0.238834	0.231053	0.206062
0	0	0	0	0	0	0	0.000707306	0	0	0.000471537	0	0	0	0	0	0	0	0	0	0	0.000707306	0	0	0	0	0	0	0	0	0	0	0	0.00141461	0	0	0	0	0	0	0	0	0	0	0.00141461	0.166924	0.152307	0.141461	0.153721	0.135803
0	0	0	0	0	0	0	0	0.00141461	0	0	0	0	0	0	0	0	0	0	0	0	0.00141461	0	0	0.000707306	0	0	0	0	0	0	0	0.000471537	0	0	0	0	0	0	0	0	0	0	0	0	0.0997301	0.0983155	0.082519	0.0832263	0.0827548
0	0	0	0	0	0	0	0	0.000707306	0	0	0	0	0	0	0	0	0	0	0	0	0	0	0	0	0	0.00141461	0	0	0	0	0	0	0	0	0	0	0	0	0	0	0	0	0	0	0	0	0	0	0
0	0	0	0	0	0	0	0	0	0	0	0	0	0	0	0	0	0	0	0	0	0	0	0	0	0	0	0	0	0	0	0	0	0	0	0	0	0	0	0	0	0	0	0	0	0	0	0	0	0
0	0	0	0	0.000707306	0	0	0	0	0	0	0	0	0.000707306	0	0	0	0	0	0	0	0	0	0	0	0	0	0.000707306	0	0	0	0	0	0	0	0	0	0.000707306	0	0.00141461	0	0	0	0.00141461	0	0	0	0.00141461	0	0
0	0	0	0	0	0	0	0	0	0	0	0	0	0	0	0	0	0	0	0	0	0	0	0.000707306	0	0	0	0	0	0	0	0	0	0.000707306	0	0	0	0	0	0	0	0	0	0	0	0	0	0	0	0
0	0	0	0	0	0	0	0	0	0	0	0	0	0	0	0	0	0.000707306	0	0	0.00141461	0	0	0	0	0	0	0	0	0	0	0	0	0.000471537	0	0	0	0	0	0	0	0	0	0	0	0	0	0	0	0
0	0	0	0	0	0	0	0	0	0	0	0	0	0.00141461	0	0	0	0	0	0	0	0	0	0	0	0	0	0	0	0	0	0	0	0	0	0	0	0	0	0	0	0	0	0	0	0	0	0	0	0
0	0	0	0	0	0	0	0	0	0	0	0	0	0	0	0	0	0	0	0	0	0	0	0	0	0	0	0	0	0	0	0	0	0	0	0	0	0	0	0	0	0	0	0	0	0	0	0	0	0
0	0	0	0	0	0	0	0	0	0	0	0	0	0	0	0	0	0	0	0	0	0	0	0	0	0	0	0	0	0	0	0	0	0	0	0	0	0	0	0.000707306	0	0	0	0	0	0	0	0	0	0
0	0	0	0	0	0	0	0	0	0	0	0	0	0	0	0	0	0	0	0	0	0	0	0	0	0	0	0	0	0	0	0	0	0	0	0	0	0	0	0	0	0	0	0	0	0	0	0	0	0
0	0	0	0	0	0	0	0	0	0	0	0	0	0	0	0	0	0	0	0	0	0	0	0	0	0	0	0	0	0	0	0	0	0	0	0	0	0	0	0	0.000471537	0	0	0	0	0	0	0	0	0
School
0.0475073	0.0518655	0.0467136	1.49047	2.48955	2.82754	0	0	0	0	0	0	0	0	0	0	0	0	0	0	0.0158396	0.0172548	0.0191591	0.0180729	0.0193743	0.0169998	0.0189311	0.0202403	0.0147866	0.01487	0.0158328	0.0170688	0.0165553	0.0167437	0.0131082	0.0148386	0.0152868	0.0148102	0.0166992	0.0165876	0.0200492	0.0186463	0.0210932	0.0216336	0.0204321	0.0257072	0.0269436	0.0183828	0.0212022	0.0208581
0.0518655	0.0554381	0.0528259	1.51669	2.61141	2.88348	0	0	0	0	0	0	0	0	0	0	0	0	0	0	0.0207341	0.0214202	0.0191843	0.0227768	0.017924	0.0149028	0.0187559	0.0217278	0.0180253	0.0177667	0.0163545	0.0153715	0.0177805	0.0163318	0.0158908	0.0133798	0.0155304	0.0162126	0.018423	0.019584	0.0191162	0.017472	0.0194253	0.0186612	0.0202439	0.0239576	0.0237322	0.0244925	0.0204131	0.0201104
0.0467136	0.0528259	0.0460647	1.46327	2.53114	2.77774	0	0	0	0	0	0	0	0	0	0	0	0	0	0	0.0186851	0.0172996	0.0180652	0.019609	0.0208061	0.0147625	0.0162023	0.0176487	0.0150902	0.0159027	0.0165021	0.0127338	0.0153974	0.0170339	0.0156021	0.0119102	0.0150856	0.015635	0.0168125	0.017331	0.0200228	0.0176777	0.0222508	0.019728	0.0187036	0.0241108	0.0226737	0.0209954	0.0184042	0.0194458
1.49047	1.51669	1.46327	42.4815	71.9742	80.1895	0	0	0	0	0	0	0	0	0	0	0	0	0	0	0.498025	0.526917	0.544254	0.556843	0.600706	0.436804	0.513228	0.530967	0.477294	0.496026	0.410536	0.419828	0.422827	0.462183	0.435004	0.423158	0.445704	0.473588	0.499825	0.474062	0.54288	0.540534	0.563392	0.538484	0.566196	0.665949	0.619473	0.586242	0.547306	0.584055
2.48955	2.61141	2.53114	71.9742	122.138	135.808	0	0	0	0	0	0	0	0	0	0	0	0	0	0	0.875618	0.888529	0.896736	0.910668	1.02569	0.738207	0.867521	0.885325	0.833642	0.832757	0.678793	0.718227	0.744541	0.783907	0.734129	0.707794	0.753764	0.804171	0.849468	0.83419	0.918073	0.928773	0.955769	0.925063	0.948448	1.12142	1.06552	0.972387	0.946084	0.959787
2.82754	2.88348	2.77774	80.1895	135.808	151.694	0	0	0	0	0	0	0	0	0	0	0	0	0	0	0.956639	0.982477	0.979481	1.00643	1.11452	0.810225	0.984392	0.986722	0.909547	0.915263	0.772273	0.778826	0.817077	0.874815	0.797015	0.791568	0.829746	0.874321	0.952046	0.918979	1.00206	1.02104	1.05905	1.02338	1.01808	1.25914	1.14496	1.0371	1.03612	1.0574
0	0	0	0	0	0	97.2774	100.873	101.535	104.904	0	0	0	0	0	0	0	0	0	0	0.0987515	0.101133	0.102849	0.113977	0.112381	0.445855	0.498856	0.482277	0.482724	0.461698	0.618537	0.620145	0.637703	0.66305	0.687149	0.800917	0.866598	0.816897	0.93181	0.907649	1.19501	1.18678	1.17017	1.19957	1.2565	1.43792	1.38222	1.31748	1.24176	1.21611
0	0	0	0	0	0	100.873	104.702	105.391	108.887	0	0	0	0	0	0	0	0	0	0	0.100445	0.104563	0.10536	0.119063	0.114832	0.460246	0.522039	0.506566	0.498069	0.485988	0.635544	0.653442	0.665025	0.685087	0.707936	0.834179	0.893196	0.851256	0.962335	0.953327	1.24639	1.22835	1.21373	1.24602	1.30321	1.4665	1.4433	1.3648	1.28172	1.26966
0	0	0	0	0	0	101.535	105.391	105.834	109.561	0	0	0	0	0	0	0	0	0	0	0.101657	0.102977	0.102913	0.118463	0.117865	0.465101	0.527633	0.499274	0.498822	0.477445	0.633243	0.657071	0.670602	0.694092	0.712324	0.831903	0.891536	0.844625	0.974918	0.945534	1.24511	1.24108	1.22137	1.24992	1.3166	1.49427	1.44477	1.36505	1.30205	1.26483
0	0	0	0	0	0	104.904	108.887	109.561	113.103	0	0	0	0	0	0	0	0	0	0	0.107018	0.108642	0.111198	0.124884	0.12144	0.480932	0.547206	0.527903	0.515267	0.505605	0.664759	0.679279	0.67654	0.703801	0.735361	0.871878	0.925522	0.8813	0.998054	0.977596	1.29277	1.27882	1.25827	1.29363	1.34767	1.53394	1.5052	1.42782	1.34631	1.32306
0	0	0	0	0	0	0	0	0	0	104.767	110.61	109.408	114.219	0	0	0	0	0	0	0.0714461	0.0892421	0.08521	0.0748327	0.105639	0.449077	0.502209	0.493021	0.562933	0.517993	0.676213	0.660248	0.67559	0.750525	0.739087	0.864703	0.972513	0.990645	0.987232	0.995419	1.62177	1.47617	1.56262	1.45995	1.50958	2.34791	2.33925	2.26541	2.1255	2.12968
0	0	0	0	0	0	0	0	0	0	110.61	116.861	115.551	120.636	0	0	0	0	0	0	0.0742815	0.0948504	0.0898252	0.079668	0.110272	0.479253	0.535874	0.522484	0.58934	0.550163	0.716663	0.688637	0.717367	0.791504	0.782065	0.914639	1.01766	1.04688	1.05189	1.05376	1.71094	1.56069	1.64962	1.53972	1.59741	2.48041	2.47393	2.38361	2.24768	2.24294
0	0	0	0	0	0	0	0	0	0	109.408	115.551	114.227	119.271	0	0	0	0	0	0	0.0739879	0.091056	0.0882475	0.0786637	0.109859	0.469332	0.52914	0.517099	0.584788	0.538569	0.70637	0.684382	0.709433	0.782385	0.776904	0.902721	1.00911	1.03687	1.04126	1.04333	1.69183	1.53847	1.62496	1.50958	1.57835	2.44259	2.43384	2.35865	2.21523	2.21955
0	0	0	0	0	0	0	0	0	0	114.219	120.636	119.271	124.505	0	0	0	0	0	0	0.0757691	0.0941341	0.0921105	0.0822273	0.113816	0.48983	0.552617	0.53643	0.606725	0.564504	0.740108	0.71586	0.741181	0.815056	0.813852	0.938693	1.05383	1.0778	1.08093	1.08475	1.76022	1.60985	1.69348	1.58186	1.64875	2.55292	2.5485	2.47141	2.31354	2.31988
0	0	0	0	0	0	0	0	0	0	0	0	0	0	128.814	130.372	132.665	114.469	0	0	0.0503937	0.0467626	0.0547161	0.0560557	0.0479792	0.431095	0.467307	0.427355	0.421823	0.428285	0.638391	0.68648	0.674953	0.749161	0.729611	0.977744	1.00162	1.07995	1.07195	1.13556	1.34963	1.37255	1.42358	1.44298	1.43575	1.61435	1.72101	1.69699	1.48353	1.4212
0	0	0	0	0	0	0	0	0	0	0	0	0	0	130.372	133.521	135.917	117.276	0	0	0.0543439	0.0472676	0.057237	0.0573047	0.0506565	0.445953	0.477313	0.442211	0.426335	0.438654	0.651685	0.696129	0.690566	0.761982	0.750115	1.00249	1.02059	1.11208	1.09549	1.16087	1.37635	1.39996	1.45744	1.47595	1.46452	1.64538	1.75791	1.73154	1.52466	1.44904
0	0	0	0	0	0	0	0	0	0	0	0	0	0	132.665	135.917	138.389	119.417	0	0	0.0545408	0.0475588	0.0572163	0.0576539	0.05051	0.4555	0.483019	0.447392	0.43494	0.451054	0.666357	0.710815	0.703993	0.782332	0.757626	1.01727	1.0441	1.12572	1.10934	1.18523	1.40723	1.41522	1.48535	1.50543	1.49163	1.67537	1.79504	1.76463	1.55883	1.46966
0	0	0	0	0	0	0	0	0	0	0	0	0	0	114.469	117.276	119.417	103.136	0	0	0.0488036	0.0414223	0.0495285	0.0524021	0.044136	0.393913	0.419916	0.381866	0.375876	0.38671	0.573271	0.615032	0.611189	0.673954	0.656331	0.881822	0.894439	0.971564	0.959949	1.01634	1.21818	1.22522	1.27849	1.30396	1.28733	1.44591	1.55092	1.51422	1.33374	1.27289
0	0	0	0	0	0	0	0	0	0	0	0	0	0	0	0	0	0	70.2751	45.6573	34.3222	31.8407	30.5576	28.0229	24.895	22.1297	17.5026	13.6601	10.7971	8.92242	5.86229	6.08375	6.32352	6.45019	6.48596	1.09177	1.17017	1.11154	1.23521	1.2767	1.39947	1.36103	1.4105	1.44096	1.41295	1.32287	1.30773	1.28774	1.23958	1.14006
0	0	0	0	0	0	0	0	0	0	0	0	0	0	0	0	0	0	45.6573	29.5898	22.2693	20.6508	19.8288	18.2022	16.1335	14.3716	11.3394	8.84084	6.99288	5.79471	3.79986	3.94786	4.09998	4.18384	4.20753	0.701676	0.757509	0.721679	0.801064	0.830264	0.910376	0.884641	0.914169	0.935916	0.911934	0.851539	0.849669	0.84228	0.818559	0.733891
0.0158396	0.0207341	0.0186851	0.498025	0.875618	0.956639	0.0987515	0.100445	0.101657	0.107018	0.0714461	0.0742815	0.0739879	0.0757691	0.0503937	0.0543439	0.0545408	0.0488036	34.3222	22.2693	16.8235	15.5812	14.9562	13.73	12.1944	10.8264	8.55421	6.66278	5.30133	4.38309	2.86305	2.98716	3.08497	3.15488	3.18851	0.538455	0.581775	0.555045	0.610039	0.636053	0.700879	0.676646	0.705204	0.713172	0.697279	0.656279	0.647082	0.642293	0.623054	0.564906
0.0172548	0.0214202	0.0172996	0.526917	0.888529	0.982477	0.101133	0.104563	0.102977	0.108642	0.0892421	0.0948504	0.091056	0.0941341	0.0467626	0.0472676	0.0475588	0.0414223	31.8407	20.6508	15.5812	14.4791	13.8925	12.7176	11.3245	10.0311	7.94236	6.19757	4.90921	4.05367	2.65953	2.76043	2.87271	2.93129	2.95714	0.500067	0.53608	0.510224	0.572776	0.585717	0.645998	0.633232	0.658111	0.66075	0.65016	0.613043	0.607948	0.599638	0.57561	0.530002
0.0191591	0.0191843	0.0180652	0.544254	0.896736	0.979481	0.102849	0.10536	0.102913	0.111198	0.08521	0.0898252	0.0882475	0.0921105	0.0547161	0.057237	0.0572163	0.0495285	30.5576	19.8288	14.9562	13.8925	13.2815	12.2193	10.864	9.6259	7.61813	5.93771	4.71438	3.90181	2.55105	2.65752	2.74517	2.81324	2.8278	0.475067	0.514435	0.495083	0.545367	0.563803	0.626714	0.610998	0.630649	0.641008	0.626693	0.587556	0.581306	0.578514	0.555769	0.509047
0.0180729	0.0227768	0.019609	0.556843	0.910668	1.00643	0.113977	0.119063	0.118463	0.124884	0.0748327	0.079668	0.0786637	0.0822273	0.0560557	0.0573047	0.0576539	0.0524021	28.0229	18.2022	13.73	12.7176	12.2193	11.2027	9.95305	8.83737	6.97394	5.46101	4.2975	3.57082	2.34499	2.43718	2.52245	2.57775	2.60465	0.437055	0.474629	0.450238	0.499171	0.521848	0.574318	0.556664	0.572501	0.582387	0.574105	0.540866	0.538042	0.528567	0.508306	0.465496
0.0193743	0.017924	0.0208061	0.600706	1.02569	1.11452	0.112381	0.114832	0.117865	0.12144	0.105639	0.110272	0.109859	0.113816	0.0479792	0.0506565	0.05051	0.044136	24.895	16.1335	12.1944	11.3245	10.864	9.95305	8.8167	7.83348	6.2157	4.84724	3.83143	3.16189	2.08629	2.16311	2.24287	2.28568	2.30367	0.393443	0.421754	0.399015	0.445013	0.460257	0.513628	0.495857	0.512951	0.522099	0.5132	0.481968	0.478743	0.469528	0.454185	0.41662
0.0169998	0.0149028	0.0147625	0.436804	0.738207	0.810225	0.445855	0.460246	0.465101	0.480932	0.449077	0.479253	0.469332	0.48983	0.431095	0.445953	0.4555	0.393913	22.1297	14.3716	10.8264	10.0311	9.6259	8.83737	7.83348	6.96415	5.52436	4.31553	3.41963	2.81945	1.8609	1.929	1.98805	2.04522	2.05853	0.358661	0.38436	0.367841	0.40277	0.415956	0.465073	0.451043	0.46952	0.47519	0.467951	0.445213	0.44012	0.436345	0.418783	0.383142
0.0189311	0.0187559	0.0162023	0.513228	0.867521	0.984392	0.498856	0.522039	0.527633	0.547206	0.502209	0.535874	0.52914	0.552617	0.467307	0.477313	0.483019	0.419916	17.5026	11.3394	8.55421	7.94236	7.61813	6.97394	6.2157	5.52436	4.36469	3.42279	2.69865	2.23529	1.46685	1.52554	1.58668	1.62336	1.63778	0.286893	0.312659	0.298097	0.325615	0.336191	0.377103	0.363693	0.380752	0.383399	0.375338	0.357543	0.359157	0.354811	0.340532	0.308534
0.0202403	0.0217278	0.0176487	0.530967	0.885325	0.986722	0.482277	0.506566	0.499274	0.527903	0.493021	0.522484	0.517099	0.53643	0.427355	0.442211	0.447392	0.381866	13.6601	8.84084	6.66278	6.19757	5.93771	5.46101	4.84724	4.31553	3.42279	2.67014	2.11162	1.74848	1.15471	1.19667	1.23371	1.26673	1.27935	0.231382	0.242243	0.233346	0.261992	0.267376	0.295539	0.292362	0.299701	0.302488	0.296179	0.290938	0.289093	0.28096	0.272095	0.247573
0.0147866	0.0180253	0.0150902	0.477294	0.833642	0.909547	0.482724	0.498069	0.498822	0.515267	0.562933	0.58934	0.584788	0.606725	0.421823	0.426335	0.43494	0.375876	10.7971	6.99288	5.30133	4.90921	4.71438	4.2975	3.83143	3.41963	2.69865	2.11162	1.67318	1.39393	0.918119	0.947752	0.986066	1.01192	1.01685	0.187444	0.196	0.185838	0.208546	0.212778	0.241083	0.234517	0.242449	0.2446	0.240437	0.232917	0.232058	0.230252	0.217837	0.205445
0.01487	0.0177667	0.0159027	0.496026	0.832757	0.915263	0.461698	0.485988	0.477445	0.505605	0.517993	0.550163	0.538569	0.564504	0.428285	0.438654	0.451054	0.38671	8.92242	5.79471	4.38309	4.05367	3.90181	3.57082	3.16189	2.81945	2.23529	1.74848	1.39393	1.14575	0.761431	0.790113	0.819942	0.834479	0.840683	0.152797	0.167711	0.158865	0.174092	0.176615	0.204792	0.198819	0.206087	0.205457	0.203542	0.197896	0.195635	0.196985	0.187014	0.172353
0.0158328	0.0163545	0.0165021	0.410536	0.678793	0.772273	0.618537	0.635544	0.633243	0.664759	0.676213	0.716663	0.70637	0.740108	0.638391	0.651685	0.666357	0.573271	5.86229	3.79986	2.86305	2.65953	2.55105	2.34499	2.08629	1.8609	1.46685	1.15471	0.918119	0.761431	0.505019	0.52628	0.545396	0.554973	0.558155	0.110185	0.120182	0.119212	0.126311	0.128069	0.147442	0.141891	0.148336	0.150833	0.149806	0.148756	0.146951	0.143308	0.137413	0.131172
0.0170688	0.0153715	0.0127338	0.419828	0.718227	0.778826	0.620145	0.653442	0.657071	0.679279	0.660248	0.688637	0.684382	0.71586	0.68648	0.696129	0.710815	0.615032	6.08375	3.94786	2.98716	2.76043	2.65752	2.43718	2.16311	1.929	1.52554	1.19667	0.947752	0.790113	0.52628	0.545354	0.561749	0.581209	0.584045	0.113842	0.122976	0.117754	0.131577	0.135215	0.149808	0.148167	0.153968	0.154714	0.152386	0.154891	0.149407	0.15218	0.142977	0.134918
0.0165553	0.0177805	0.0153974	0.422827	0.744541	0.817077	0.637703	0.665025	0.670602	0.67654	0.67559	0.717367	0.709433	0.741181	0.674953	0.690566	0.703993	0.611189	6.32352	4.09998	3.08497	2.87271	2.74517	2.52245	2.24287	1.98805	1.58668	1.23371	0.986066	0.819942	0.545396	0.561749	0.585795	0.597776	0.603084	0.117844	0.1257	0.122896	0.135406	0.139256	0.156892	0.155631	0.160895	0.158542	0.159327	0.159706	0.157933	0.154787	0.14711	0.138032
0.0167437	0.0163318	0.0170339	0.462183	0.783907	0.874815	0.66305	0.685087	0.694092	0.703801	0.750525	0.791504	0.782385	0.815056	0.749161	0.761982	0.782332	0.673954	6.45019	4.18384	3.15488	2.93129	2.81324	2.57775	2.28568	2.04522	1.62336	1.26673	1.01192	0.834479	0.554973	0.581209	0.597776	0.614364	0.612395	0.122584	0.130971	0.127232	0.139132	0.146224	0.163078	0.159272	0.162518	0.165156	0.163245	0.168092	0.163539	0.163385	0.152903	0.14682
0.0131082	0.0158908	0.0156021	0.435004	0.734129	0.797015	0.687149	0.707936	0.712324	0.735361	0.739087	0.782065	0.776904	0.813852	0.729611	0.750115	0.757626	0.656331	6.48596	4.20753	3.18851	2.95714	2.8278	2.60465	2.30367	2.05853	1.63778	1.27935	1.01685	0.840683	0.558155	0.584045	0.603084	0.612395	0.609811	0.122296	0.13337	0.126668	0.140624	0.14383	0.166143	0.158932	0.165679	0.169248	0.161689	0.166642	0.1608	0.163172	0.152692	0.140619
0.0148386	0.0133798	0.0119102	0.423158	0.707794	0.791568	0.800917	0.834179	0.831903	0.871878	0.864703	0.914639	0.902721	0.938693	0.977744	1.00249	1.01727	0.881822	1.09177	0.701676	0.538455	0.500067	0.475067	0.437055	0.393443	0.358661	0.286893	0.231382	0.187444	0.152797	0.110185	0.113842	0.117844	0.122584	0.122296	0.0440712	0.0463033	0.0461495	0.0480786	0.0511718	0.0622795	0.0599426	0.0602003	0.0598449	0.0636927	0.0711366	0.0695109	0.0699625	0.0648862	0.0616485
0.0152868	0.0155304	0.0150856	0.445704	0.753764	0.829746	0.866598	0.893196	0.891536	0.925522	0.972513	1.01766	1.00911	1.05383	1.00162	1.02059	1.0441	0.894439	1.17017	0.757509	0.581775	0.53608	0.514435	0.474629	0.421754	0.38436	0.312659	0.242243	0.196	0.167711	0.120182	0.122976	0.1257	0.130971	0.13337	0.0463033	0.0461674	0.0500373	0.0536434	0.0521959	0.0638077	0.0635134	0.0660821	0.0664392	0.0650212	0.0758082	0.0759127	0.0776566	0.0699399	0.0678206
0.0148102	0.0162126	0.015635	0.473588	0.804171	0.874321	0.816897	0.851256	0.844625	0.8813	0.990645	1.04688	1.03687	1.0778	1.07995	1.11208	1.12572	0.971564	1.11154	0.721679	0.555045	0.510224	0.495083	0.450238	0.399015	0.367841	0.298097	0.233346	0.185838	0.158865	0.119212	0.117754	0.122896	0.127232	0.126668	0.0461495	0.0500373	0.0469098	0.0512615	0.0545771	0.0668313	0.0622146	0.0640325	0.0678888	0.0646907	0.0766345	0.0764646	0.0747331	0.069439	0.0674982
0.0166992	0.018423	0.0168125	0.499825	0.849468	0.952046	0.93181	0.962335	0.974918	0.998054	0.987232	1.05189	1.04126	1.08093	1.07195	1.09549	1.10934	0.959949	1.23521	0.801064	0.610039	0.572776	0.545367	0.499171	0.445013	0.40277	0.325615	0.261992	0.208546	0.174092	0.126311	0.131577	0.135406	0.139132	0.140624	0.0480786	0.0536434	0.0512615	0.0538571	0.0555749	0.068168	0.068484	0.0714905	0.0681022	0.0682619	0.0805737	0.0800245	0.0780505	0.0714354	0.0697613
0.0165876	0.019584	0.017331	0.474062	0.83419	0.918979	0.907649	0.953327	0.945534	0.977596	0.995419	1.05376	1.04333	1.08475	1.13556	1.16087	1.18523	1.01634	1.2767	0.830264	0.636053	0.585717	0.563803	0.521848	0.460257	0.415956	0.336191	0.267376	0.212778	0.176615	0.128069	0.135215	0.139256	0.146224	0.14383	0.0511718	0.0521959	0.0545771	0.0555749	0.0555063	0.0702646	0.0711748	0.070569	0.0719857	0.0716179	0.0836756	0.0833862	0.0801004	0.0742239	0.0727264
0.0200492	0.0191162	0.0200228	0.54288	0.918073	1.00206	1.19501	1.24639	1.24511	1.29277	1.62177	1.71094	1.69183	1.76022	1.34963	1.37635	1.40723	1.21818	1.39947	0.910376	0.700879	0.645998	0.626714	0.574318	0.513628	0.465073	0.377103	0.295539	0.241083	0.204792	0.147442	0.149808	0.156892	0.163078	0.166143	0.0622795	0.0638077	0.0668313	0.068168	0.0702646	0.0900206	0.0848799	0.0882217	0.0905357	0.0910543	0.108731	0.106847	0.104739	0.0993962	0.0937503
0.0186463	0.017472	0.0176777	0.540534	0.928773	1.02104	1.18678	1.22835	1.24108	1.27882	1.47617	1.56069	1.53847	1.60985	1.37255	1.39996	1.41522	1.22522	1.36103	0.884641	0.676646	0.633232	0.610998	0.556664	0.495857	0.451043	0.363693	0.292362	0.234517	0.198819	0.141891	0.148167	0.155631	0.159272	0.158932	0.0599426	0.0635134	0.0622146	0.068484	0.0711748	0.0848799	0.084337	0.0851961	0.0877248	0.0858469	0.105196	0.102354	0.0982851	0.0932532	0.0902664
0.0210932	0.0194253	0.0222508	0.563392	0.955769	1.05905	1.17017	1.21373	1.22137	1.25827	1.56262	1.64962	1.62496	1.69348	1.42358	1.45744	1.48535	1.27849	1.4105	0.914169	0.705204	0.658111	0.630649	0.572501	0.512951	0.46952	0.380752	0.299701	0.242449	0.206087	0.148336	0.153968	0.160895	0.162518	0.165679	0.0602003	0.0660821	0.0640325	0.0714905	0.070569	0.0882217	0.0851961	0.0928789	0.0874858	0.0909681	0.105953	0.105723	0.102654	0.097027	0.0945255
0.0216336	0.0186612	0.019728	0.538484	0.925063	1.02338	1.19957	1.24602	1.24992	1.29363	1.45995	1.53972	1.50958	1.58186	1.44298	1.47595	1.50543	1.30396	1.44096	0.935916	0.713172	0.66075	0.641008	0.582387	0.522099	0.47519	0.383399	0.302488	0.2446	0.205457	0.150833	0.154714	0.158542	0.165156	0.169248	0.0598449	0.0664392	0.0678888	0.0681022	0.0719857	0.0905357	0.0877248	0.0874858	0.0905387	0.0907357	0.106621	0.104024	0.100889	0.0962627	0.0924835
0.0204321	0.0202439	0.0187036	0.566196	0.948448	1.01808	1.2565	1.30321	1.3166	1.34767	1.50958	1.59741	1.57835	1.64875	1.43575	1.46452	1.49163	1.28733	1.41295	0.911934	0.697279	0.65016	0.626693	0.574105	0.5132	0.467951	0.375338	0.296179	0.240437	0.203542	0.149806	0.152386	0.159327	0.163245	0.161689	0.0636927	0.0650212	0.0646907	0.0682619	0.0716179	0.0910543	0.0858469	0.0909681	0.0907357	0.090052	0.106097	0.105032	0.105171	0.0976926	0.0935461
0.0257072	0.0239576	0.0241108	0.665949	1.12142	1.25914	1.43792	1.4665	1.49427	1.53394	2.34791	2.48041	2.44259	2.55292	1.61435	1.64538	1.67537	1.44591	1.32287	0.851539	0.656279	0.613043	0.587556	0.540866	0.481968	0.445213	0.357543	0.290938	0.232917	0.197896	0.148756	0.154891	0.159706	0.168092	0.166642	0.0711366	0.0758082	0.0766345	0.0805737	0.0836756	0.108731	0.105196	0.105953	0.106621	0.106097	0.128758	0.130275	0.124056	0.121494	0.11454
0.0269436	0.0237322	0.0226737	0.619473	1.06552	1.14496	1.38222	1.4433	1.44477	1.5052	2.33925	2.47393	2.43384	2.5485	1.72101	1.75791	1.79504	1.55092	1.30773	0.849669	0.647082	0.607948	0.581306	0.538042	0.478743	0.44012	0.359157	0.289093	0.232058	0.195635	0.146951	0.149407	0.157933	0.163539	0.1608	0.0695109	0.0759127	0.0764646	0.0800245	0.0833862	0.106847	0.102354	0.105723	0.104024	0.105032	0.130275	0.12643	0.126017	0.119983	0.113943
0.0183828	0.0244925	0.0209954	0.586242	0.972387	1.0371	1.31748	1.3648	1.36505	1.42782	2.26541	2.38361	2.35865	2.47141	1.69699	1.73154	1.76463	1.51422	1.28774	0.84228	0.642293	0.599638	0.578514	0.528567	0.469528	0.436345	0.354811	0.28096	0.230252	0.196985	0.143308	0.15218	0.154787	0.163385	0.163172	0.0699625	0.0776566	0.0747331	0.0780505	0.0801004	0.104739	0.0982851	0.102654	0.100889	0.105171	0.124056	0.126017	0.119599	0.114992	0.111013
0.0212022	0.0204131	0.0184042	0.547306	0.946084	1.03612	1.24176	1.28172	1.30205	1.34631	2.1255	2.24768	2.21523	2.31354	1.48353	1.52466	1.55883	1.33374	1.23958	0.818559	0.623054	0.57561	0.555769	0.508306	0.454185	0.418783	0.340532	0.272095	0.217837	0.187014	0.137413	0.142977	0.14711	0.152903	0.152692	0.0648862	0.0699399	0.069439	0.0714354	0.0742239	0.0993962	0.0932532	0.097027	0.0962627	0.0976926	0.121494	0.119983	0.114992	0.109063	0.105988
0.0208581	0.0201104	0.0194458	0.584055	0.959787	1.0574	1.21611	1.26966	1.26483	1.32306	2.12968	2.24294	2.21955	2.31988	1.4212	1.44904	1.46966	1.27289	1.14006	0.733891	0.564906	0.530002	0.509047	0.465496	0.41662	0.383142	0.308534	0.247573	0.205445	0.172353	0.131172	0.134918	0.138032	0.14682	0.140619	0.0616485	0.0678206	0.0674982	0.0697613	0.0727264	0.0937503	0.0902664	0.0945255	0.0924835	0.0935461	0.11454	0.113943	0.111013	0.105988	0.102217
0.015882	0.0149656	0.0132904	0.464006	0.790228	0.86943	1.52914	1.59302	1.5894	1.64432	2.71783	2.86426	2.83899	2.95584	1.81372	1.86526	1.89097	1.63383	1.20202	0.786343	0.595519	0.55317	0.531001	0.491858	0.441339	0.411685	0.331159	0.267467	0.21836	0.182748	0.142683	0.14501	0.151705	0.156374	0.160341	0.0716892	0.0793772	0.0771933	0.0817702	0.0835339	0.110823	0.105111	0.111376	0.110219	0.108419	0.137695	0.13827	0.133302	0.125448	0.122079
0.0149293	0.0149036	0.0149106	0.404586	0.6938	0.761391	1.44282	1.50969	1.51272	1.55437	2.71859	2.87297	2.8436	2.96586	1.83159	1.87479	1.91426	1.64731	1.08965	0.705428	0.542947	0.506203	0.486297	0.449968	0.399298	0.375206	0.304764	0.243273	0.199397	0.169208	0.13338	0.137521	0.14064	0.143864	0.147722	0.069599	0.075645	0.0744057	0.0811391	0.0798738	0.105183	0.102885	0.111541	0.105382	0.106742	0.131577	0.135057	0.13009	0.122723	0.120239
0.013539	0.0152911	0.0146042	0.392141	0.670069	0.717842	1.41598	1.45829	1.47276	1.52821	2.51356	2.63956	2.61483	2.73552	1.51351	1.54861	1.5762	1.35688	1.07455	0.699992	0.536748	0.502288	0.482204	0.441729	0.394488	0.364764	0.296507	0.238937	0.194558	0.163017	0.125885	0.128893	0.134029	0.142379	0.140484	0.0669841	0.0700192	0.0719102	0.0733748	0.0739876	0.101091	0.0941898	0.0992637	0.100105	0.0988051	0.124028	0.122983	0.122743	0.111718	0.111533
0.0126394	0.010722	0.0130345	0.324301	0.568241	0.623364	1.267	1.31746	1.32117	1.37843	2.2626	2.40246	2.3632	2.47684	1.468	1.50937	1.53517	1.32634	0.974875	0.633733	0.480041	0.444231	0.432595	0.399023	0.356458	0.332434	0.269986	0.215789	0.174267	0.147469	0.115707	0.118492	0.12049	0.12597	0.125174	0.0588449	0.0638128	0.0639383	0.0691129	0.0677026	0.090017	0.087238	0.0908182	0.0892874	0.0920163	0.113068	0.115619	0.110472	0.101117	0.0988655
0.0139102	0.014206	0.0140871	0.381921	0.665403	0.719735	1.20981	1.2608	1.26647	1.30281	2.15309	2.28179	2.25654	2.35954	1.46477	1.4955	1.51997	1.32118	0.902387	0.583419	0.451386	0.419003	0.398534	0.371344	0.329859	0.31209	0.254382	0.199477	0.168023	0.139557	0.10834	0.11309	0.115846	0.120341	0.120892	0.0568284	0.0611365	0.0633024	0.0664447	0.0655788	0.0875029	0.0840477	0.087297	0.0864011	0.0887824	0.109224	0.111792	0.108138	0.097591	0.0991744
0.00638847	0.00607187	0.00927225	0.195228	0.329717	0.360075	1.29508	1.35604	1.36914	1.39816	1.68587	1.77491	1.74671	1.82805	1.37618	1.41968	1.44134	1.24518	0.9249	0.596331	0.456153	0.421575	0.407456	0.372638	0.333893	0.308316	0.254775	0.20193	0.163832	0.137441	0.102938	0.108536	0.110552	0.117429	0.117947	0.0515996	0.0558229	0.0552497	0.0599505	0.0589871	0.0794908	0.0744248	0.079202	0.0785501	0.0805727	0.0983243	0.0958553	0.0920413	0.0865143	0.0838687
0.00577802	0.00538818	0.00568088	0.153964	0.263699	0.284006	1.01008	1.05442	1.05638	1.07503	1.37617	1.472	1.44563	1.50448	1.12636	1.16691	1.18451	1.02428	0.766678	0.496988	0.383638	0.353175	0.341489	0.308798	0.275401	0.260132	0.209981	0.167118	0.137218	0.114235	0.087416	0.0886941	0.0917724	0.0946288	0.0963023	0.0423748	0.0473091	0.0474472	0.0467058	0.0479605	0.0648809	0.0617995	0.0645035	0.0626323	0.0653405	0.0773861	0.0803283	0.0752631	0.0699363	0.070775
0.00473428	0.00576892	0.00384502	0.135319	0.235109	0.250842	0.889527	0.929203	0.922752	0.967939	1.17966	1.24683	1.23507	1.27512	0.934228	0.965212	0.986048	0.853577	0.678747	0.436652	0.33475	0.311106	0.297569	0.275226	0.245452	0.22533	0.183836	0.146279	0.120648	0.101474	0.0758688	0.0799042	0.0816265	0.0841984	0.0851265	0.0372176	0.0388184	0.0396192	0.0412364	0.0421423	0.0548052	0.053768	0.0548281	0.0546301	0.0564785	0.0668397	0.0669961	0.0653281	0.0595842	0.0584687
0.00434773	0.00539767	0.00480956	0.121322	0.194224	0.2223	0.765652	0.793561	0.804935	0.831837	1.04677	1.10001	1.09684	1.13713	0.788188	0.805865	0.813946	0.703601	0.624124	0.403739	0.301485	0.285768	0.274196	0.255276	0.227147	0.207177	0.169991	0.134484	0.107217	0.0921318	0.0703742	0.0701345	0.0745079	0.0746406	0.0749708	0.0329929	0.0347193	0.0353574	0.0357744	0.0368741	0.0488845	0.0469008	0.047636	0.0479389	0.0492132	0.058597	0.0593322	0.058031	0.0535772	0.0513177
0.00298285	0.0036441	0.00347248	0.113324	0.186345	0.199303	0.657884	0.679753	0.684133	0.7109	0.906676	0.956797	0.948521	0.992096	0.7522	0.760527	0.777288	0.67207	0.500951	0.323958	0.244803	0.230341	0.219215	0.204595	0.180385	0.165975	0.134945	0.107387	0.0875911	0.0762092	0.0548434	0.0574814	0.0614203	0.0631137	0.064313	0.0269623	0.0287864	0.0297171	0.0301888	0.0305344	0.0431046	0.0386339	0.0413184	0.0414384	0.0440659	0.0492756	0.050649	0.050478	0.0464018	0.0457902
0.00147424	0.000549525	0.000773529	0.022867	0.0391612	0.0450035	0.185703	0.184595	0.185545	0.195747	0.347164	0.366648	0.367639	0.380215	0.527628	0.548654	0.552693	0.478451	1.08006	0.699669	0.526526	0.486428	0.467264	0.431574	0.383001	0.343801	0.272168	0.214059	0.167606	0.140296	0.0966012	0.100487	0.100972	0.1061	0.107515	0.0251411	0.027598	0.0276805	0.0291706	0.0294618	0.0354067	0.0349592	0.0353349	0.0355143	0.0358626	0.0376774	0.0379927	0.0379058	0.0352501	0.0335875
7.23e-05	0.000261787	0.000203125	0.00860731	0.0196524	0.0211577	0.087522	0.0917404	0.0926745	0.0967058	0.169465	0.177069	0.176473	0.181352	0.2142	0.21933	0.222898	0.193493	0.454307	0.290443	0.223809	0.208652	0.196061	0.1826	0.162519	0.14285	0.113891	0.0911934	0.0733409	0.0601885	0.0421157	0.0422442	0.0436148	0.0464373	0.0443729	0.0104312	0.0117325	0.0114151	0.012223	0.0132449	0.016372	0.0153409	0.0153674	0.0146851	0.015588	0.01687	0.0164721	0.0160388	0.0159404	0.0153463
0.000116912	0.000116912	0.00049533	0.00299728	0.0049204	0.00619111	0.0489171	0.0476841	0.0485568	0.0515535	0.0640342	0.0661659	0.066495	0.0697714	0.114151	0.119584	0.120245	0.103867	0.228802	0.148636	0.110934	0.105226	0.0994396	0.0907591	0.0813922	0.0729405	0.0567266	0.0444444	0.035749	0.0302292	0.0206354	0.0200606	0.0214349	0.0233214	0.0222482	0.00549277	0.00560798	0.00540056	0.00597455	0.0065024	0.00719191	0.00693645	0.00746011	0.00773711	0.00760599	0.00762688	0.00803286	0.00835775	0.00762746	0.00723386
0.000276447	0	0.000329685	0.00415325	0.0108502	0.00888314	0.0496224	0.0494345	0.0473786	0.0497739	0.0730399	0.0770428	0.0762057	0.078644	0.116597	0.120167	0.123713	0.107283	0.228513	0.147256	0.109935	0.103973	0.0971266	0.0908345	0.0804555	0.0740701	0.0560854	0.0455338	0.035384	0.0295592	0.0200567	0.0203069	0.0206641	0.0211647	0.0230423	0.00567351	0.00624292	0.0059357	0.00658243	0.00640895	0.00746945	0.00713365	0.00781366	0.00774834	0.00741379	0.00824921	0.00832642	0.00808668	0.00743571	0.00779622
6.46458e-05	0.000239181	0.00021979	0.00357247	0.00737649	0.00817396	0.0292404	0.0300867	0.0323353	0.0296978	0.0694645	0.0728215	0.07261	0.0751374	0.0693448	0.0729109	0.0743054	0.0630013	0.194956	0.128043	0.0931667	0.0875964	0.0856405	0.0796107	0.066976	0.0613098	0.0495076	0.0394758	0.0291179	0.0261416	0.0173807	0.0173811	0.0190332	0.0194199	0.0197238	0.00472117	0.00432242	0.00455226	0.00512958	0.00538919	0.00601402	0.00556788	0.00654792	0.00640722	0.00609016	0.00695406	0.00683509	0.00727179	0.00596646	0.00570954
0.000112137	0.000183157	0.000627418	0.00944278	0.0189871	0.0203841	0.015203	0.0161859	0.0177836	0.0167462	0.00457345	0.00520313	0.0048321	0.00492704	0.0194301	0.0197485	0.0198318	0.0171777	0.35859	0.227758	0.175462	0.162703	0.154856	0.142	0.124813	0.112082	0.0896735	0.068216	0.0546413	0.044454	0.0294827	0.0297437	0.0319485	0.0325	0.0332305	0.00555314	0.00591606	0.00599343	0.00665261	0.00667919	0.00766153	0.00687763	0.00740675	0.00781875	0.00773221	0.00680469	0.00693924	0.00773535	0.00755683	0.00622807
0.00021979	0	0.000140891	0.0017076	0.00337011	0.00479875	0.00483994	0.00527636	0.0050831	0.00507441	0.00464153	0.00527057	0.00512632	0.00499701	0.0130636	0.0131503	0.013562	0.0111013	0.261488	0.169209	0.128102	0.119746	0.112838	0.106122	0.0952174	0.0838733	0.0646573	0.051001	0.0408831	0.0338157	0.0228997	0.0226497	0.0241657	0.0239995	0.0255421	0.0039844	0.00441905	0.0041801	0.00477872	0.00494456	0.0057589	0.00541598	0.00499895	0.00577552	0.00580346	0.00529171	0.00516352	0.00506966	0.004646	0.00465072
0.000124879	0.000394012	0	0.00432378	0.00794965	0.00767475	0.00586093	0.00598758	0.00645101	0.00700815	0.00348468	0.00362553	0.00379993	0.00373039	0.0133432	0.0129231	0.0133386	0.0112849	0.196764	0.128105	0.0967228	0.0902065	0.08775	0.0773371	0.0695314	0.0619601	0.0502795	0.0388482	0.0306714	0.0258546	0.0160679	0.0173841	0.0179288	0.0184987	0.0186672	0.00319542	0.00362233	0.00339877	0.00341901	0.00371479	0.00408352	0.00403331	0.00477434	0.00404716	0.00393841	0.0041775	0.0040379	0.00416396	0.00409165	0.0034781
0	0	0.000116912	0.000818367	0.00175364	0.00257201	0.00661285	0.00638523	0.00590213	0.00629004	0	0	0	0	0.00350073	0.00420624	0.00405335	0.00362081	0.138823	0.0911964	0.0706563	0.0633046	0.0623562	0.0541907	0.0502024	0.0455434	0.0348894	0.027735	0.0212825	0.0179684	0.0121628	0.0130463	0.0123747	0.0132326	0.0123592	0.00198735	0.0025428	0.00253208	0.00226837	0.0026582	0.0027951	0.0028342	0.00283731	0.00286802	0.00292773	0.00298121	0.00267498	0.00281937	0.00272534	0.00225484
0	0	0	0	0	0	0.00394819	0.0042741	0.00342964	0.00349486	0	0	0	0	0	0	0	0	0.0577359	0.0383791	0.0277003	0.026362	0.0244992	0.0227011	0.0202114	0.0182084	0.0143739	0.0111309	0.00847876	0.00802324	0.00475508	0.00521813	0.00503674	0.00533912	0.00532983	0.000986303	0.00119626	0.0007802	0.00121746	0.000981731	0.00126825	0.00113693	0.00129849	0.0012232	0.00108395	0.00118326	0.00118071	0.00125504	0.00113201	0.00105221
0	0	0	0	0	0	0	0	0	0	0	0	0	0	0	0	0	0	0	0	0	0	0	0	0	0	0	0	0	0	0	0	0	0	0	0	0	0	0	0	0	0	0	0	0	0	0	0	0	0
0	0	0	0	0	0	0	0	0	0	0	0	0	0	0	0	0	0	0	0	0	0	0	0	0	0	0	0	0	0	0	0	0	0	0	0	0	0	0	0	0	0	0	0	0	0	0	0	0	0
0	0	0	0	0	0	0	0	0	0	0	0	0	0	0	0	0	0	0	0	0	0	0	0	0	0	0	0	0	0	0	0	0	0	0	0	0	0	0	0	0	0	0	0	0	0	0	0	0	0
0	0	0	0	0	0	0	0	0	0	0	0	0	0	0	0	0	0	0	0	0	0	0	0	0	0	0	0	0	0	0	0	0	0	0	0	0	0	0	0	0	0	0	0	0	0	0	0	0	0
0	0	0	0	0	0	0	0	0	0	0	0	0	0	0	0	0	0	0	0	0	0	0	0	0	0	0	0	0	0	0	0	0	0	0	0	0	0	0	0	0	0	0	0	0	0	0	0	0	0
0	0	0	0	0	0	0	0	0	0	0	0	0	0	0	0	0	0	0	0	0	0	0	0	0	0	0	0	0	0	0	0	0	0	0	0	0	0	0	0	0	0	0	0	0	0	0	0	0	0
0	0	0	0	0	0	0	0	0	0	0	0	0	0	0	0	0	0	0	0	0	0	0	0	0	0	0	0	0	0	0	0	0	0	0	0	0	0	0	0	0	0	0	0	0	0	0	0	0	0
0	0	0	0	0	0	0	0	0	0	0	0	0	0	0	0	0	0	0	0	0	0	0	0	0	0	0	0	0	0	0	0	0	0	0	0	0	0	0	0	0	0	0	0	0	0	0	0	0	0
0	0	0	0	0	0	0	0	0	0	0	0	0	0	0	0	0	0	0	0	0	0	0	0	0	0	0	0	0	0	0	0	0	0	0	0	0	0	0	0	0	0	0	0	0	0	0	0	0	0
0	0	0	0	0	0	0	0	0	0	0	0	0	0	0	0	0	0	0	0	0	0	0	0	0	0	0	0	0	0	0	0	0	0	0	0	0	0	0	0	0	0	0	0	0	0	0	0	0	0
0	0	0	0	0	0	0	0	0	0	0	0	0	0	0	0	0	0	0	0	0	0	0	0	0	0	0	0	0	0	0	0	0	0	0	0	0	0	0	0	0	0	0	0	0	0	0	0	0	0
0	0	0	0	0	0	0	0	0	0	0	0	0	0	0	0	0	0	0	0	0	0	0	0	0	0	0	0	0	0	0	0	0	0	0	0	0	0	0	0	0	0	0	0	0	0	0	0	0	0
0	0	0	0	0	0	0	0	0	0	0	0	0	0	0	0	0	0	0	0	0	0	0	0	0	0	0	0	0	0	0	0	0	0	0	0	0	0	0	0	0	0	0	0	0	0	0	0	0	0
0	0	0	0	0	0	0	0	0	0	0	0	0	0	0	0	0	0	0	0	0	0	0	0	0	0	0	0	0	0	0	0	0	0	0	0	0	0	0	0	0	0	0	0	0	0	0	0	0	0
0	0	0	0	0	0	0	0	0	0	0	0	0	0	0	0	0	0	0	0	0	0	0	0	0	0	0	0	0	0	0	0	0	0	0	0	0	0	0	0	0	0	0	0	0	0	0	0	0	0
0	0	0	0	0	0	0	0	0	0	0	0	0	0	0	0	0	0	0	0	0	0	0	0	0	0	0	0	0	0	0	0	0	0	0	0	0	0	0	0	0	0	0	0	0	0	0	0	0	0
0	0	0	0	0	0	0	0	0	0	0	0	0	0	0	0	0	0	0	0	0	0	0	0	0	0	0	0	0	0	0	0	0	0	0	0	0	0	0	0	0	0	0	0	0	0	0	0	0	0
0	0	0	0	0	0	0	0	0	0	0	0	0	0	0	0	0	0	0	0	0	0	0	0	0	0	0	0	0	0	0	0	0	0	0	0	0	0	0	0	0	0	0	0	0	0	0	0	0	0
0	0	0	0	0	0	0	0	0	0	0	0	0	0	0	0	0	0	0	0	0	0	0	0	0	0	0	0	0	0	0	0	0	0	0	0	0	0	0	0	0	0	0	0	0	0	0	0	0	0
0	0	0	0	0	0	0	0	0	0	0	0	0	0	0	0	0	0	0	0	0	0	0	0	0	0	0	0	0	0	0	0	0	0	0	0	0	0	0	0	0	0	0	0	0	0	0	0	0	0
0	0	0	0	0	0	0	0	0	0	0	0	0	0	0	0	0	0	0	0	0	0	0	0	0	0	0	0	0	0	0	0	0	0	0	0	0	0	0	0	0	0	0	0	0	0	0	0	0	0
0	0	0	0	0	0	0	0	0	0	0	0	0	0	0	0	0	0	0	0	0	0	0	0	0	0	0	0	0	0	0	0	0	0	0	0	0	0	0	0	0	0	0	0	0	0	0	0	0	0
0	0	0	0	0	0	0	0	0	0	0	0	0	0	0	0	0	0	0	0	0	0	0	0	0	0	0	0	0	0	0	0	0	0	0	0	0	0	0	0	0	0	0	0	0	0	0	0	0	0
0	0	0	0	0	0	0	0	0	0	0	0	0	0	0	0	0	0	0	0	0	0	0	0	0	0	0	0	0	0	0	0	0	0	0	0	0	0	0	0	0	0	0	0	0	0	0	0	0	0
0	0	0	0	0	0	0	0	0	0	0	0	0	0	0	0	0	0	0	0	0	0	0	0	0	0	0	0	0	0	0	0	0	0	0	0	0	0	0	0	0	0	0	0	0	0	0	0	0	0
0	0	0	0	0	0	0	0	0	0	0	0	0	0	0	0	0	0	0	0	0	0	0	0	0	0	0	0	0	0	0	0	0	0	0	0	0	0	0	0	0	0	0	0	0	0	0	0	0	0
0	0	0	0	0	0	0	0	0	0	0	0	0	0	0	0	0	0	0	0	0	0	0	0	0	0	0	0	0	0	0	0	0	0	0	0	0	0	0	0	0	0	0	0	0	0	0	0	0	0
0	0	0	0	0	0	0	0	0	0	0	0	0	0	0	0	0	0	0	0	0	0	0	0	0	0	0	0	0	0	0	0	0	0	0	0	0	0	0	0	0	0	0	0	0	0	0	0	0	0
0	0	0	0	0	0	0	0	0	0	0	0	0	0	0	0	0	0	0	0	0	0	0	0	0	0	0	0	0	0	0	0	0	0	0	0	0	0	0	0	0	0	0	0	0	0	0	0	0	0
0	0	0	0	0	0	0	0	0	0	0	0	0	0	0	0	0	0	0	0	0	0	0	0	0	0	0	0	0	0	0	0	0	0	0	0	0	0	0	0	0	0	0	0	0	0	0	0	0	0
Workplace
0	0	0	0	0	0	0	0	0	0	0	0	0	0	0	0	0	0	0	0	0	0	0	0	0	0	0	0	0	0	0	0	0	0	0	0	0	0	0	0	0	0	0	0	0	0	0	0	0	0
0	0	0	0	0	0	0	0	0	0	0	0	0	0	0	0	0	0	0	0	0	0	0	0	0	0	0	0	0	0	0	0	0	0	0	0	0	0	0	0	0	0	0	0	0	0	0	0	0	0
0	0	0	0	0	0	0	0	0	0	0	0	0	0	0	0	0	0	0	0	0	0	0	0	0	0	0	0	0	0	0	0	0	0	0	0	0	0	0	0	0	0	0	0	0	0	0	0	0	0
0	0	0	0	0	0	0	0	0	0	0	0	0	0	0	0	0	0	0	0	0	0	0	0	0	0	0	0	0	0	0	0	0	0	0	0	0	0	0	0	0	0	0	0	0	0	0	0	0	0
0	0	0	0	0	0	0	0	0	0	0	0	0	0	0	0	0	0	0	0	0	0	0	0	0	0	0	0	0	0	0	0	0	0	0	0	0	0	0	0	0	0	0	0	0	0	0	0	0	0
0	0	0	0	0	0	0	0	0	0	0	0	0	0	0	0	0	0	0	0	0	0	0	0	0	0	0	0	0	0	0	0	0	0	0	0	0	0	0	0	0	0	0	0	0	0	0	0	0	0
0	0	0	0	0	0	0	0	0	0	0	0	0	0	0	0	0	0	0	0	0	0	0	0	0	0	0	0	0	0	0	0	0	0	0	0	0	0	0	0	0	0	0	0	0	0	0	0	0	0
0	0	0	0	0	0	0	0	0	0	0	0	0	0	0	0	0	0	0	0	0	0	0	0	0	0	0	0	0	0	0	0	0	0	0	0	0	0	0	0	0	0	0	0	0	0	0	0	0	0
0	0	0	0	0	0	0	0	0	0	0	0	0	0	0	0	0	0	0	0	0	0	0	0	0	0	0	0	0	0	0	0	0	0	0	0	0	0	0	0	0	0	0	0	0	0	0	0	0	0
0	0	0	0	0	0	0	0	0	0	0	0	0	0	0	0	0	0	0	0	0	0	0	0	0	0	0	0	0	0	0	0	0	0	0	0	0	0	0	0	0	0	0	0	0	0	0	0	0	0
0	0	0	0	0	0	0	0	0	0	0	0	0	0	0	0	0	0	0	0	0	0	0	0	0	0	0	0	0	0	0	0	0	0	0	0	0	0	0	0	0	0	0	0	0	0	0	0	0	0
0	0	0	0	0	0	0	0	0	0	0	0	0	0	0	0	0	0	0	0	0	0	0	0	0	0	0	0	0	0	0	0	0	0	0	0	0	0	0	0	0	0	0	0	0	0	0	0	0	0
0	0	0	0	0	0	0	0	0	0	0	0	0	0	0	0	0	0	0	0	0	0	0	0	0	0	0	0	0	0	0	0	0	0	0	0	0	0	0	0	0	0	0	0	0	0	0	0	0	0
0	0	0	0	0	0	0	0	0	0	0	0	0	0	0	0	0	0	0	0	0	0	0	0	0	0	0	0	0	0	0	0	0	0	0	0	0	0	0	0	0	0	0	0	0	0	0	0	0	0
0	0	0	0	0	0	0	0	0	0	0	0	0	0	0	0	0	0	0	0	0	0	0	0	0	0	0	0	0	0	0	0	0	0	0	0	0	0	0	0	0	0	0	0	0	0	0	0	0	0
0	0	0	0	0	0	0	0	0	0	0	0	0	0	0	0	0	0	0	0	0	0	0	0	0	0	0	0	0	0	0	0	0	0	0	0	0	0	0	0	0	0	0	0	0	0	0	0	0	0
0	0	0	0	0	0	0	0	0	0	0	0	0	0	0	0	0	0	0	0	0	0	0	0	0	0	0	0	0	0	0	0	0	0	0	0	0	0	0	0	0	0	0	0	0	0	0	0	0	0
0	0	0	0	0	0	0	0	0	0	0	0	0	0	0	0	0	0.0879253	0.226246	0.428482	0.492539	0.517901	0.54083	0.600268	0.609422	0.653527	0.702899	0.7101	0.694425	0.689725	0.730143	0.726149	0.75405	0.778787	0.78347	0.871135	0.89427	0.918863	0.968089	0.992622	0.983475	1.00837	0.992989	1.00241	1.00967	0.946289	0.939968	0.868404	0.84696	0.794958
0	0	0	0	0	0	0	0	0	0	0	0	0	0	0	0	0	0.226246	0.518124	1.00556	1.14624	1.22258	1.26158	1.35722	1.44246	1.53766	1.65571	1.6358	1.6109	1.6082	1.69758	1.70447	1.81313	1.82098	1.82965	2.01855	2.0834	2.13837	2.28129	2.33887	2.30198	2.35132	2.35663	2.34545	2.31352	2.22673	2.1583	2.07998	1.9893	1.85508
0	0	0	0	0	0	0	0	0	0	0	0	0	0	0	0	0	0.428482	1.00556	1.94624	2.28196	2.35038	2.44513	2.65492	2.76898	3.01468	3.17836	3.20634	3.14681	3.12693	3.26028	3.32494	3.40063	3.5217	3.55693	3.91976	4.08139	4.17121	4.41431	4.56529	4.46164	4.56573	4.5156	4.54777	4.52195	4.35804	4.1862	4.0025	3.82025	3.58132
0	0	0	0	0	0	0	0	0	0	0	0	0	0	0	0	0	0.492539	1.14624	2.28196	2.61003	2.73573	2.90522	3.02089	3.20587	3.50194	3.67689	3.73077	3.63367	3.59682	3.79889	3.78483	3.98514	4.06232	4.06814	4.52447	4.71483	4.79726	5.12267	5.27483	5.15122	5.22051	5.26116	5.2684	5.23459	5.00644	4.85541	4.64751	4.38855	4.22379
0	0	0	0	0	0	0	0	0	0	0	0	0	0	0	0	0	0.517901	1.22258	2.35038	2.73573	2.896	2.99609	3.21707	3.36811	3.66572	3.88351	3.95138	3.83706	3.8264	4.03042	4.04679	4.20959	4.28301	4.32258	4.79769	4.96495	5.08471	5.37797	5.55806	5.43809	5.55838	5.5473	5.52726	5.49561	5.32159	5.07805	4.92043	4.66179	4.38199
0	0	0	0	0	0	0	0	0	0	0	0	0	0	0	0	0	0.54083	1.26158	2.44513	2.90522	2.99609	3.18374	3.34166	3.54706	3.82819	4.02329	4.06603	3.98784	3.9626	4.16135	4.17507	4.38225	4.48805	4.49318	5.02468	5.16434	5.28809	5.63911	5.76888	5.69574	5.79076	5.70817	5.76559	5.73163	5.53138	5.28858	5.11403	4.8865	4.55641
0	0	0	0	0	0	0	0	0	0	0	0	0	0	0	0	0	0.600268	1.35722	2.65492	3.02089	3.21707	3.34166	3.58704	3.76283	4.05977	4.33913	4.34591	4.25817	4.2269	4.45092	4.46795	4.68082	4.76368	4.78637	5.35755	5.53792	5.65137	6.02571	6.18197	6.11092	6.17931	6.15853	6.16092	6.11426	5.91201	5.67486	5.42623	5.20084	4.93553
0	0	0	0	0	0	0	0	0	0	0	0	0	0	0	0	0	0.609422	1.44246	2.76898	3.20587	3.36811	3.54706	3.76283	3.95462	4.30503	4.53216	4.57282	4.50071	4.46919	4.66563	4.70102	4.89718	5.01139	5.0087	5.56438	5.81192	5.93812	6.32819	6.49989	6.42709	6.44991	6.45506	6.47365	6.47718	6.16717	5.96869	5.72409	5.45542	5.20169
0	0	0	0	0	0	0	0	0	0	0	0	0	0	0	0	0	0.653527	1.53766	3.01468	3.50194	3.66572	3.82819	4.05977	4.30503	4.65936	4.94819	5.0112	4.87803	4.86022	5.09161	5.13774	5.37361	5.52543	5.49974	6.07198	6.30924	6.47057	6.89607	7.04047	6.95852	7.08238	7.01866	7.04031	7.02128	6.70136	6.47971	6.22708	5.89198	5.59992
0	0	0	0	0	0	0	0	0	0	0	0	0	0	0	0	0	0.702899	1.65571	3.17836	3.67689	3.88351	4.02329	4.33913	4.53216	4.94819	5.18959	5.2964	5.16563	5.17315	5.378	5.47947	5.61713	5.77542	5.79278	6.42856	6.70414	6.84171	7.29568	7.4695	7.34275	7.51333	7.4645	7.44446	7.42724	7.11932	6.83883	6.57295	6.29838	5.9355
0	0	0	0	0	0	0	0	0	0	0	0	0	0	0	0	0	0.7101	1.6358	3.20634	3.73077	3.95138	4.06603	4.34591	4.57282	5.0112	5.2964	5.35177	5.19927	5.19731	5.39114	5.42739	5.6967	5.85095	5.81969	6.54147	6.77537	6.89601	7.30402	7.58432	7.35726	7.51535	7.492	7.53641	7.50241	7.1543	6.92445	6.6448	6.29096	5.99012
0	0	0	0	0	0	0	0	0	0	0	0	0	0	0	0	0	0.694425	1.6109	3.14681	3.63367	3.83706	3.98784	4.25817	4.50071	4.87803	5.16563	5.19927	5.09858	5.07591	5.31534	5.34137	5.56771	5.71678	5.67117	6.32214	6.5539	6.72088	7.12228	7.3518	7.23954	7.31887	7.30585	7.32812	7.27987	7.05429	6.75891	6.45885	6.19318	5.81027
0	0	0	0	0	0	0	0	0	0	0	0	0	0	0	0	0	0.689725	1.6082	3.12693	3.59682	3.8264	3.9626	4.2269	4.46919	4.86022	5.17315	5.19731	5.07591	5.08054	5.26306	5.34038	5.5519	5.68343	5.69778	6.29575	6.55624	6.71148	7.13131	7.31354	7.19078	7.30929	7.25803	7.3077	7.2083	7.03139	6.69833	6.4785	6.1474	5.83027
0	0	0	0	0	0	0	0	0	0	0	0	0	0	0	0	0	0.730143	1.69758	3.26028	3.79889	4.03042	4.16135	4.45092	4.66563	5.09161	5.378	5.39114	5.31534	5.26306	5.55613	5.58187	5.89438	5.94298	5.96471	6.62762	6.8372	7.02199	7.4046	7.71456	7.55507	7.6798	7.67096	7.68593	7.63141	7.35701	7.05244	6.73884	6.46438	6.08581
0	0	0	0	0	0	0	0	0	0	0	0	0	0	0	0	0	0.726149	1.70447	3.32494	3.78483	4.04679	4.17507	4.46795	4.70102	5.13774	5.47947	5.42739	5.34137	5.34038	5.58187	5.58873	5.86269	6.00638	6.00578	6.68092	6.92116	7.05742	7.5239	7.75862	7.64689	7.73103	7.69806	7.72946	7.62802	7.36288	7.09003	6.83437	6.50048	6.1203
0	0	0	0	0	0	0	0	0	0	0	0	0	0	0	0	0	0.75405	1.81313	3.40063	3.98514	4.20959	4.38225	4.68082	4.89718	5.37361	5.61713	5.6967	5.56771	5.5519	5.89438	5.86269	6.08227	6.2332	6.32053	6.98823	7.21442	7.38463	7.89169	8.06999	7.92611	8.03858	8.08271	7.99116	7.9683	7.69138	7.42669	7.08401	6.80928	6.4092
0	0	0	0	0	0	0	0	0	0	0	0	0	0	0	0	0	0.778787	1.82098	3.5217	4.06232	4.28301	4.48805	4.76368	5.01139	5.52543	5.77542	5.85095	5.71678	5.68343	5.94298	6.00638	6.2332	6.45686	6.42679	7.10593	7.38751	7.55799	8.00505	8.27246	8.17341	8.22786	8.2574	8.2298	8.1989	7.90067	7.55704	7.25659	6.94223	6.54235
0	0	0	0	0	0	0	0	0	0	0	0	0	0	0	0	0	0.78347	1.82965	3.55693	4.06814	4.32258	4.49318	4.78637	5.0087	5.49974	5.79278	5.81969	5.67117	5.69778	5.96471	6.00578	6.32053	6.42679	6.50819	7.1556	7.44985	7.60528	8.06454	8.32544	8.1998	8.24023	8.28454	8.25997	8.16305	7.85761	7.61435	7.27267	6.93672	6.56242
0	0	0	0	0	0	0	0	0	0	0	0	0	0	0	0	0	0.871135	2.01855	3.91976	4.52447	4.79769	5.02468	5.35755	5.56438	6.07198	6.42856	6.54147	6.32214	6.29575	6.62762	6.68092	6.98823	7.10593	7.1556	7.96654	8.21045	8.43679	8.9617	9.16626	9.05566	9.14774	9.20327	9.19801	9.17017	8.7546	8.4453	8.05588	7.7215	7.28787
0	0	0	0	0	0	0	0	0	0	0	0	0	0	0	0	0	0.89427	2.0834	4.08139	4.71483	4.96495	5.16434	5.53792	5.81192	6.30924	6.70414	6.77537	6.5539	6.55624	6.8372	6.92116	7.21442	7.38751	7.44985	8.21045	8.57924	8.72977	9.29112	9.58079	9.39293	9.53188	9.47126	9.53444	9.42431	9.09267	8.7243	8.38982	7.98512	7.54854
0	0	0	0	0	0	0	0	0	0	0	0	0	0	0	0	0	0.918863	2.13837	4.17121	4.79726	5.08471	5.28809	5.65137	5.93812	6.47057	6.84171	6.89601	6.72088	6.71148	7.02199	7.05742	7.38463	7.55799	7.60528	8.43679	8.72977	8.91362	9.49397	9.76021	9.62252	9.71673	9.80657	9.67786	9.683	9.28558	8.91693	8.59832	8.15461	7.7233
0	0	0	0	0	0	0	0	0	0	0	0	0	0	0	0	0	0.968089	2.28129	4.41431	5.12267	5.37797	5.63911	6.02571	6.32819	6.89607	7.29568	7.30402	7.12228	7.13131	7.4046	7.5239	7.89169	8.00505	8.06454	8.9617	9.29112	9.49397	10.1479	10.36	10.2537	10.3315	10.3224	10.3669	10.2462	9.88094	9.51117	9.15321	8.71725	8.2289
0	0	0	0	0	0	0	0	0	0	0	0	0	0	0	0	0	0.992622	2.33887	4.56529	5.27483	5.55806	5.76888	6.18197	6.49989	7.04047	7.4695	7.58432	7.3518	7.31354	7.71456	7.75862	8.06999	8.27246	8.32544	9.16626	9.58079	9.76021	10.36	10.6243	10.5041	10.6135	10.6083	10.6571	10.5667	10.1324	9.71548	9.36165	8.98131	8.48178
0	0	0	0	0	0	0	0	0	0	0	0	0	0	0	0	0	0.983475	2.30198	4.46164	5.15122	5.43809	5.69574	6.11092	6.42709	6.95852	7.34275	7.35726	7.23954	7.19078	7.55507	7.64689	7.92611	8.17341	8.1998	9.05566	9.39293	9.62252	10.2537	10.5041	10.3565	10.4416	10.4426	10.4623	10.3458	10.0177	9.64965	9.26737	8.84338	8.32001
0	0	0	0	0	0	0	0	0	0	0	0	0	0	0	0	0	1.00837	2.35132	4.56573	5.22051	5.55838	5.79076	6.17931	6.44991	7.08238	7.51333	7.51535	7.31887	7.30929	7.6798	7.73103	8.03858	8.22786	8.24023	9.14774	9.53188	9.71673	10.3315	10.6135	10.4416	10.6476	10.5255	10.6479	10.4667	10.1258	9.73905	9.41329	8.93166	8.4317
0	0	0	0	0	0	0	0	0	0	0	0	0	0	0	0	0	0.992989	2.35663	4.5156	5.26116	5.5473	5.70817	6.15853	6.45506	7.01866	7.4645	7.492	7.30585	7.25803	7.67096	7.69806	8.08271	8.2574	8.28454	9.20327	9.47126	9.80657	10.3224	10.6083	10.4426	10.5255	10.6071	10.6244	10.5322	10.089	9.74771	9.41064	8.93081	8.43542
0	0	0	0	0	0	0	0	0	0	0	0	0	0	0	0	0	1.00241	2.34545	4.54777	5.2684	5.52726	5.76559	6.16092	6.47365	7.04031	7.44446	7.53641	7.32812	7.3077	7.68593	7.72946	7.99116	8.2298	8.25997	9.19801	9.53444	9.67786	10.3669	10.6571	10.4623	10.6479	10.6244	10.6211	10.5531	10.1344	9.77107	9.35261	8.98546	8.48237
0	0	0	0	0	0	0	0	0	0	0	0	0	0	0	0	0	1.00967	2.31352	4.52195	5.23459	5.49561	5.73163	6.11426	6.47718	7.02128	7.42724	7.50241	7.27987	7.2083	7.63141	7.62802	7.9683	8.1989	8.16305	9.17017	9.42431	9.683	10.2462	10.5667	10.3458	10.4667	10.5322	10.5531	10.5217	10.0676	9.68874	9.33595	8.87694	8.36715
0	0	0	0	0	0	0	0	0	0	0	0	0	0	0	0	0	0.946289	2.22673	4.35804	5.00644	5.32159	5.53138	5.91201	6.16717	6.70136	7.11932	7.1543	7.05429	7.03139	7.35701	7.36288	7.69138	7.90067	7.85761	8.7546	9.09267	9.28558	9.88094	10.1324	10.0177	10.1258	10.089	10.1344	10.0676	9.63805	9.36225	8.92389	8.51016	8.06569
0	0	0	0	0	0	0	0	0	0	0	0	0	0	0	0	0	0.939968	2.1583	4.1862	4.85541	5.07805	5.28858	5.67486	5.96869	6.47971	6.83883	6.92445	6.75891	6.69833	7.05244	7.09003	7.42669	7.55704	7.61435	8.4453	8.7243	8.91693	9.51117	9.71548	9.64965	9.73905	9.74771	9.77107	9.68874	9.36225	8.91134	8.60495	8.16837	7.72062
0	0	0	0	0	0	0	0	0	0	0	0	0	0	0	0	0	0.868404	2.07998	4.0025	4.64751	4.92043	5.11403	5.42623	5.72409	6.22708	6.57295	6.6448	6.45885	6.4785	6.73884	6.83437	7.08401	7.25659	7.27267	8.05588	8.38982	8.59832	9.15321	9.36165	9.26737	9.41329	9.41064	9.35261	9.33595	8.92389	8.60495	8.26286	7.85969	7.50176
0	0	0	0	0	0	0	0	0	0	0	0	0	0	0	0	0	0.84696	1.9893	3.82025	4.38855	4.66179	4.8865	5.20084	5.45542	5.89198	6.29838	6.29096	6.19318	6.1474	6.46438	6.50048	6.80928	6.94223	6.93672	7.7215	7.98512	8.15461	8.71725	8.98131	8.84338	8.93166	8.93081	8.98546	8.87694	8.51016	8.16837	7.85969	7.57933	7.11899
0	0	0	0	0	0	0	0	0	0	0	0	0	0	0	0	0	0.794958	1.85508	3.58132	4.22379	4.38199	4.55641	4.93553	5.20169	5.59992	5.9355	5.99012	5.81027	5.83027	6.08581	6.1203	6.4092	6.54235	6.56242	7.28787	7.54854	7.7233	8.2289	8.48178	8.32001	8.4317	8.43542	8.48237	8.36715	8.06569	7.72062	7.50176	7.11899	6.7142
0	0	0	0	0	0	0	0	0	0	0	0	0	0	0	0	0	0.750606	1.75798	3.44492	3.91026	4.20648	4.33567	4.64273	4.85009	5.27246	5.5936	5.61439	5.52175	5.47107	5.7241	5.79635	6.02596	6.24168	6.22608	6.86142	7.15153	7.25833	7.78917	8.00645	7.92814	7.95753	7.9645	7.97496	7.95502	7.61453	7.30768	7.08522	6.64315	6.33705
0	0	0	0	0	0	0	0	0	0	0	0	0	0	0	0	0	0.728146	1.70133	3.32101	3.7884	4.02583	4.16788	4.47392	4.68882	5.08002	5.38857	5.39992	5.31887	5.27719	5.5044	5.62133	5.85659	5.98921	5.99085	6.6357	6.90799	7.00755	7.49122	7.67322	7.54659	7.67224	7.70981	7.62936	7.6291	7.34505	7.01344	6.82286	6.4675	6.09683
0	0	0	0	0	0	0	0	0	0	0	0	0	0	0	0	0	0.669287	1.56375	3.0225	3.51049	3.68307	3.82141	4.12241	4.32336	4.6549	4.94863	4.97304	4.87905	4.85476	5.09756	5.09632	5.37186	5.48101	5.47818	6.0981	6.34037	6.46391	6.89672	7.09542	6.97756	7.04365	7.01709	7.00629	6.98168	6.71872	6.50257	6.18178	5.91889	5.5849
0	0	0	0	0	0	0	0	0	0	0	0	0	0	0	0	0	0.628621	1.45199	2.78161	3.24551	3.42798	3.57849	3.78768	4.02623	4.33616	4.56666	4.61078	4.50621	4.45965	4.69676	4.69932	4.93512	5.04009	5.08323	5.65792	5.83852	5.98167	6.33988	6.52385	6.43763	6.495	6.51518	6.50432	6.52783	6.20987	5.98794	5.77514	5.46997	5.1855
0	0	0	0	0	0	0	0	0	0	0	0	0	0	0	0	0	0.571822	1.34932	2.62422	3.03821	3.23023	3.31987	3.57591	3.76837	4.08159	4.30781	4.36818	4.26424	4.19764	4.44513	4.4657	4.67701	4.74145	4.7611	5.33208	5.54251	5.6692	6.01988	6.15985	6.0607	6.167	6.14245	6.1746	6.13113	5.89558	5.64238	5.43059	5.22765	4.88353
0	0	0	0	0	0	0	0	0	0	0	0	0	0	0	0	0	0.55777	1.289	2.49795	2.90357	3.04679	3.16073	3.39858	3.62376	3.88925	4.11993	4.14857	4.04191	4.02277	4.23651	4.22874	4.41409	4.52271	4.55167	5.09304	5.17815	5.3933	5.70994	5.83897	5.77578	5.85335	5.82709	5.83568	5.80972	5.59383	5.40343	5.17542	4.90086	4.61902
0	0	0	0	0	0	0	0	0	0	0	0	0	0	0	0	0	0.43816	1.02498	2.02593	2.31811	2.48191	2.54208	2.72945	2.87782	3.10357	3.29595	3.28842	3.23244	3.21921	3.43087	3.40118	3.55329	3.67559	3.61854	4.06687	4.16706	4.31337	4.56429	4.71026	4.63146	4.67564	4.69681	4.67931	4.68677	4.48188	4.31021	4.16839	3.9719	3.73938
0	0	0	0	0	0	0	0	0	0	0	0	0	0	0	0	0	0.382921	0.874982	1.73316	2.01623	2.11072	2.20465	2.38401	2.4669	2.698	2.81813	2.89353	2.79765	2.80619	2.91095	2.93185	3.10298	3.14891	3.14883	3.48728	3.6657	3.71378	3.92241	4.01519	4.02463	4.05562	4.0853	4.07504	4.02798	3.89107	3.72478	3.56161	3.41673	3.23894
0	0	0	0	0	0	0	0	0	0	0	0	0	0	0	0	0	0.331617	0.786527	1.5069	1.78693	1.85809	1.94261	2.059	2.17472	2.38234	2.50623	2.49759	2.44372	2.42932	2.56755	2.55746	2.67904	2.7306	2.78673	3.07631	3.18007	3.22799	3.44762	3.55404	3.52606	3.55287	3.55388	3.56309	3.55224	3.40349	3.26287	3.16975	2.97802	2.82462
0	0	0	0	0	0	0	0	0	0	0	0	0	0	0	0	0	0.294771	0.684174	1.32773	1.49933	1.62515	1.70015	1.81473	1.8929	2.06286	2.16179	2.20459	2.14791	2.13003	2.22988	2.25063	2.3358	2.4009	2.4213	2.68458	2.76304	2.82607	3.01632	3.10994	3.0699	3.09728	3.10051	3.09672	3.03284	2.94592	2.86359	2.75611	2.59107	2.42924
0	0	0	0	0	0	0	0	0	0	0	0	0	0	0	0	0	0.246395	0.589014	1.16651	1.34087	1.38865	1.46733	1.56823	1.64834	1.79301	1.91423	1.91184	1.85142	1.83374	1.94812	1.9323	2.03271	2.07649	2.06878	2.30552	2.382	2.4822	2.61678	2.68179	2.67535	2.70417	2.69561	2.71768	2.7027	2.57887	2.46288	2.39354	2.25827	2.12416
0	0	0	0	0	0	0	0	0	0	0	0	0	0	0	0	0	0.106558	0.261444	0.478048	0.561281	0.594983	0.605274	0.666894	0.694617	0.739516	0.78061	0.791611	0.781889	0.76214	0.810551	0.818466	0.861581	0.867509	0.881233	0.96939	1.00625	1.04448	1.10403	1.11284	1.11165	1.12362	1.12539	1.14316	1.13061	1.08802	1.02507	0.981368	0.963506	0.896583
0	0	0	0	0	0	0	0	0	0	0	0	0	0	0	0	0	0.0508534	0.128238	0.230268	0.275163	0.292105	0.29613	0.323931	0.331934	0.361322	0.372511	0.389932	0.374302	0.371997	0.390429	0.39428	0.415293	0.417183	0.427157	0.467678	0.47859	0.50115	0.523065	0.538782	0.525678	0.547037	0.535615	0.538933	0.538236	0.530302	0.489272	0.475687	0.452803	0.428989
0	0	0	0	0	0	0	0	0	0	0	0	0	0	0	0	0	0.0534461	0.123132	0.240907	0.281165	0.299895	0.314551	0.320531	0.335813	0.367044	0.393722	0.397042	0.385619	0.38975	0.405733	0.394936	0.427691	0.433657	0.434836	0.468939	0.49237	0.523587	0.535776	0.573352	0.548435	0.5563	0.563918	0.558942	0.54531	0.548313	0.511112	0.500311	0.478278	0.442593
0	0	0	0	0	0	0	0	0	0	0	0	0	0	0	0	0	0.0437786	0.106307	0.214807	0.232296	0.248551	0.254716	0.275136	0.287977	0.319259	0.332801	0.325659	0.310441	0.331142	0.341706	0.343458	0.357263	0.369429	0.366254	0.400986	0.42455	0.427451	0.460211	0.473012	0.463573	0.467695	0.469015	0.469787	0.469403	0.452034	0.433735	0.426424	0.393702	0.36484
0	0	0	0	0	0	0	0	0	0	0	0	0	0	0	0	0	0.0373603	0.0841108	0.162629	0.182063	0.197796	0.207389	0.222085	0.232991	0.24983	0.261405	0.265444	0.259083	0.254766	0.275027	0.284896	0.274072	0.305912	0.295913	0.320822	0.342497	0.353898	0.375464	0.373457	0.364255	0.384874	0.382668	0.36472	0.373992	0.354901	0.3408	0.332161	0.309511	0.290028
0	0	0	0	0	0	0	0	0	0	0	0	0	0	0	0	0	0.0271166	0.0646053	0.116346	0.138681	0.151668	0.1588	0.176247	0.175991	0.19621	0.201755	0.197706	0.197823	0.204451	0.211504	0.204924	0.212576	0.215099	0.230465	0.254214	0.25783	0.263591	0.282777	0.279927	0.284948	0.291542	0.280645	0.293114	0.284578	0.274986	0.254275	0.253894	0.241843	0.230774
0	0	0	0	0	0	0	0	0	0	0	0	0	0	0	0	0	0.0199387	0.0476915	0.0852154	0.10376	0.110572	0.113412	0.115957	0.127894	0.135271	0.147501	0.148622	0.138136	0.14765	0.149797	0.144547	0.155593	0.159741	0.164951	0.181705	0.190981	0.192537	0.206755	0.204419	0.20249	0.208238	0.202292	0.199688	0.211138	0.20796	0.195772	0.18245	0.173934	0.164983
0	0	0	0	0	0	0	0	0	0	0	0	0	0	0	0	0	0.0142429	0.0297627	0.0556399	0.0659446	0.0674734	0.068322	0.0771945	0.0771949	0.0922672	0.093784	0.0971401	0.0896011	0.0901795	0.0997744	0.0923825	0.100518	0.102316	0.0995876	0.113442	0.114252	0.12263	0.131742	0.131741	0.13372	0.138481	0.133715	0.133686	0.134197	0.124999	0.124029	0.117044	0.115977	0.10637
0	0	0	0	0	0	0	0	0	0	0	0	0	0	0	0	0	0.00401912	0.0118387	0.0237896	0.0297316	0.0331079	0.0322556	0.0365322	0.0373289	0.03638	0.0459346	0.0411771	0.0417111	0.0403876	0.0415329	0.0419785	0.0453058	0.0438684	0.0435123	0.0482977	0.050684	0.0549554	0.055689	0.0568504	0.055348	0.0559116	0.0606454	0.0596693	0.0625798	0.0558189	0.0528504	0.0529566	0.0511909	0.0448709
0	0	0	0	0	0	0	0	0	0	0	0	0	0	0	0	0	0.00349916	0.00920155	0.0151071	0.0189542	0.0219479	0.0218283	0.0252451	0.0234648	0.0276296	0.024262	0.0261332	0.0230947	0.0258292	0.0264529	0.0257915	0.0287743	0.0296175	0.0308394	0.0326341	0.0323063	0.0345739	0.0386909	0.0383369	0.0415666	0.0378169	0.0346173	0.0361964	0.0389177	0.0347994	0.0350292	0.0321136	0.0336969	0.0293828
0	0	0	0	0	0	0	0	0	0	0	0	0	0	0	0	0	0.00282881	0.00689384	0.0106386	0.0127028	0.0140801	0.016493	0.0155889	0.0178378	0.0172978	0.0168084	0.0172055	0.0176153	0.016574	0.0186277	0.017459	0.0191322	0.0204796	0.0200722	0.0221714	0.0216398	0.0211033	0.0238269	0.0270507	0.0254881	0.0249441	0.0234283	0.022551	0.026336	0.0219128	0.0243388	0.0224385	0.0222605	0.0200351
0	0	0	0	0	0	0	0	0	0	0	0	0	0	0	0	0	0.00157701	0.00302465	0.00594372	0.0066608	0.00803953	0.00700755	0.00658464	0.00938738	0.00991861	0.0088326	0.0112918	0.00898633	0.0099284	0.0104401	0.0101198	0.00916098	0.0102352	0.0118998	0.0129462	0.0118723	0.0142324	0.0140264	0.0136766	0.0144349	0.0126966	0.0152229	0.013168	0.0174832	0.0120777	0.014351	0.0124851	0.0131909	0.0112122
0	0	0	0	0	0	0	0	0	0	0	0	0	0	0	0	0	0.00119162	0.00252665	0.00591176	0.00539341	0.00500779	0.00652522	0.00629058	0.00845821	0.00733433	0.00730671	0.00788015	0.00814269	0.00907194	0.00814196	0.00756933	0.00853532	0.00859946	0.0107631	0.00969718	0.00860222	0.010025	0.0113328	0.00995982	0.00990726	0.0106972	0.011224	0.0115659	0.0118661	0.0105943	0.0103416	0.0108198	0.00855687	0.00738782
0	0	0	0	0	0	0	0	0	0	0	0	0	0	0	0	0	0.000887964	0.00144336	0.00415124	0.00414404	0.00379969	0.00404161	0.00434445	0.00470563	0.00387718	0.00594459	0.00497181	0.0049953	0.00498485	0.00507915	0.00440872	0.00616417	0.00465362	0.00357975	0.0072983	0.00613036	0.0064487	0.00772232	0.0073413	0.00624446	0.00673669	0.00835381	0.00757824	0.00737345	0.00639605	0.0070605	0.00622399	0.00619851	0.00599326
0	0	0	0	0	0	0	0	0	0	0	0	0	0	0	0	0	0.000277892	0.00102472	0.00265933	0.00159515	0.00289602	0.00245342	0.00369996	0.00273459	0.00343089	0.00374543	0.0035783	0.00312058	0.00466399	0.00357331	0.00354927	0.00387662	0.00415543	0.00535176	0.005761	0.00459047	0.00525681	0.00581873	0.00617644	0.00569105	0.00451562	0.00509816	0.00641004	0.00513715	0.00458315	0.0040417	0.00487025	0.00466092	0.00605664
0	0	0	0	0	0	0	0	0	0	0	0	0	0	0	0	0	9.33379e-05	0.000804498	0.000859892	0.00159904	0.0020765	0.00153745	0.00174367	0.00243938	0.00179187	0.00178728	0.00255576	0.00295334	0.00154256	0.00187322	0.00268089	0.00235183	0.00192259	0.00203813	0.00282417	0.00311549	0.00312515	0.00391123	0.00292008	0.00253468	0.00399719	0.00318505	0.00388764	0.0027086	0.00244971	0.00255738	0.0034346	0.00304667	0.00246007
0	0	0	0	0	0	0	0	0	0	0	0	0	0	0	0	0	0.000348101	0.000602962	0.00175401	0.00068789	0.000701689	0.00134769	0.000860246	0.00100941	0.00134979	0.00155073	0.00162246	0.00178475	0.00187812	0.00193821	0.00122711	0.00150349	0.0018562	0.00157261	0.00214511	0.00257	0.00256412	0.0020166	0.00251035	0.00150888	0.00309001	0.00227423	0.00248591	0.00289166	0.00215778	0.0022696	0.00247286	0.00217605	0.00185423
0	0	0	0	0	0	0	0	0	0	0	0	0	0	0	0	0	4.07494e-05	0.000256676	0.00192605	0.000639417	0.000544557	0.00074565	0.000801676	0.00112662	0.00141765	0.00113157	0.00104389	0.000834141	0.0012185	0.00227343	0.000797893	0.000693334	0.000893717	0.00139083	0.000897539	0.0012356	0.0018554	0.00108799	0.00151855	0.00150884	0.00131987	0.00143779	0.000861922	0.00101355	0.00119309	0.00107264	0.00144068	0.00148488	0.000902074
0	0	0	0	0	0	0	0	0	0	0	0	0	0	0	0	0	4.86849e-05	0.00014672	0.000413779	0.000451133	0.000292002	0.000168743	0.000869082	0.0010746	0.000293268	0.000996128	0.000595115	0.000282835	0.000576189	0.000586611	0.000575524	0.000575584	0.000754804	0.000967713	0.00102563	0.000379066	0.000946872	0.00085505	0.000640222	0.000695275	0.000789892	0.000896822	0.000866607	0.000549551	0.000666242	0.00108657	0.000398377	0.000933578	0.000903104
0	0	0	0	0	0	0	0	0	0	0	0	0	0	0	0	0	8.18184e-06	3.01494e-05	7.61333e-05	0.000134216	0.000173854	0.000117181	0.000498655	8.43151e-05	0.0001802	0.000350989	0.000193815	0.000142395	0.000948409	0.000618597	0.00017611	0.000160802	0.000389401	0.00099929	0.00022393	0.000882174	0.000563365	0.000702058	0.000486284	0.000944254	0.000630426	0.000704631	0.00111865	0.000547958	0.000742978	0.000840102	0.000200124	0.0002277	0.000453137
0	0	0	0	0	0	0	0	0	0	0	0	0	0	0	0	0	0	1.59759e-05	0	3.19493e-05	0.000196655	7.98744e-05	3.19493e-05	0.000106314	6.38985e-05	0.000111824	4.79252e-05	0.000473184	0.000202164	0.000276529	7.98744e-05	0.000471256	7.98744e-05	0.00036687	0.000138263	7.98744e-05	9.58478e-05	1.59759e-05	0.000170215	9.58478e-05	0.000138263	0.000465746	0.000702891	0.000234114	0.000202164	0.000465746	7.98744e-05	0.000111824	0.00012229
0	0	0	0	0	0	0	0	0	0	0	0	0	0	0	0	0	3.45848e-05	4.00027e-05	0.000484675	0.000152791	0.000163624	0.000455005	0.000208091	0.000162484	0.00107708	0.000300569	0.000798003	0.000340952	0.000270069	0.000714835	0.000309364	0.000610292	0.0004179	0.000678969	0.000343519	0.000486692	0.000377585	0.000498903	0.000231842	0.000427756	0.000432508	0.000762488	0.000470871	0.000845134	0.00077242	0.000242204	0.000634235	0.000215505	0.000513229
0	0	0	0	0	0	0	0	0	0	0	0	0	0	0	0	0	0	0	0	0	0	0	0	0	0	0.000174659	0.000174659	0	0.000349314	0	0	0	0	0.000174659	0.000349314	0.000349314	0	0.000174659	0.000174659	0	0	0	0	0	0	0	0.000174659	0	0
0	0	0	0	0	0	0	0	0	0	0	0	0	0	0	0	0	0	0	0	0	0	0	0	0	0	0	0	0	0	0	0	0	0	0	0	0	0	0	0	0	0	0	0	0	0	0	0	0	0
0	0	0	0	0	0	0	0	0	0	0	0	0	0	0	0	0	5.64581e-06	1.694e-05	5.08175e-05	5.64633e-05	7.90466e-05	5.08175e-05	2.82317e-05	5.08175e-05	6.21091e-05	5.64633e-05	5.64633e-05	6.77549e-05	3.95233e-05	2.82317e-05	5.08175e-05	3.95233e-05	8.4695e-05	4.51691e-05	6.21091e-05	0.00013551	9.59866e-05	7.90466e-05	8.4695e-05	7.90466e-05	6.77549e-05	0.000112924	7.90466e-05	5.64633e-05	0.000112924	7.90466e-05	7.90466e-05	4.51691e-05	6.77549e-05
0	0	0	0	0	0	0	0	0	0	0	0	0	0	0	0	0	0	0	0	0	0	0	0	0	0	0	0	0	0	0	0	0	0	0	0	0	0	0	0	0	0	0	0	0	0	0	0	0	0
0	0	0	0	0	0	0	0	0	0	0	0	0	0	0	0	0	0	0	0	0	0	0	0	0	0	0	0	0	0	0	0	0	0	0	0	0	0	0	0	0	0	0	0	0	0	0	0	0	0
0	0	0	0	0	0	0	0	0	0	0	0	0	0	0	0	0	0	0	0	0	0	0	0	0	0	0	0	0	0	0	0	0	0	0	0	0	0	0	0	0	0	0	0	0	0	0	0	0	0
0	0	0	0	0	0	0	0	0	0	0	0	0	0	0	0	0	0	0	0	0	0	0	0	0	0	0	0	0	0	0	0	0	0	0	0	0	0	0	0	0	0	0	0	0	0	0	0	0	0
0	0	0	0	0	0	0	0	0	0	0	0	0	0	0	0	0	0	0	0	0	0	0	0	0	0	0	0	0	0	0	0	0	0	0	0	0	0	0	0	0	0	0	0	0	0	0	0	0	0
0	0	0	0	0	0	0	0	0	0	0	0	0	0	0	0	0	0	0	0	0	0	0	0	0	0	0	0	0	0	0	0	0	0	0	0	0	0	0	0	0	0	0	0	0	0	0	0	0	0
0	0	0	0	0	0	0	0	0	0	0	0	0	0	0	0	0	0	0	0	0	0	0	0	0	0	0	0	0	0	0	0	0	0	0	0	0	0	0	0	0	0	0	0	0	0	0	0	0	0
0	0	0	0	0	0	0	0	0	0	0	0	0	0	0	0	0	0	0	0	0	0	0	0	0	0	0	0	0	0	0	0	0	0	0	0	0	0	0	0	0	0	0	0	0	0	0	0	0	0
0	0	0	0	0	0	0	0	0	0	0	0	0	0	0	0	0	0	0	0	0	0	0	0	0	0	0	0	0	0	0	0	0	0	0	0	0	0	0	0	0	0	0	0	0	0	0	0	0	0
0	0	0	0	0	0	0	0	0	0	0	0	0	0	0	0	0	0	0	0	0	0	0	0	0	0	0	0	0	0	0	0	0	0	0	0	0	0	0	0	0	0	0	0	0	0	0	0	0	0
0	0	0	0	0	0	0	0	0	0	0	0	0	0	0	0	0	0	0	0	0	0	0	0	0	0	0	0	0	0	0	0	0	0	0	0	0	0	0	0	0	0	0	0	0	0	0	0	0	0
0	0	0	0	0	0	0	0	0	0	0	0	0	0	0	0	0	0	0	0	0	0	0	0	0	0	0	0	0	0	0	0	0	0	0	0	0	0	0	0	0	0	0	0	0	0	0	0	0	0
0	0	0	0	0	0	0	0	0	0	0	0	0	0	0	0	0	0	0	0	0	0	0	0	0	0	0	0	0	0	0	0	0	0	0	0	0	0	0	0	0	0	0	0	0	0	0	0	0	0
0	0	0	0	0	0	0	0	0	0	0	0	0	0	0	0	0	0	0	0	0	0	0	0	0	0	0	0	0	0	0	0	0	0	0	0	0	0	0	0	0	0	0	0	0	0	0	0	0	0
General community
0.79832	0.833072	0.843026	0.860617	0.838598	0.888528	0.861759	0.894313	0.89943	0.929625	0.957504	1.01129	0.999861	1.04382	1.07164	1.09464	1.11431	1.0898	1.08634	1.09676	1.07613	1.09243	1.1109	1.14138	1.152	1.21264	1.21887	1.19224	1.13875	1.11669	1.13723	1.15155	1.20798	1.24182	1.24641	1.32023	1.37371	1.40821	1.50113	1.53972	1.53407	1.55028	1.55839	1.56648	1.5583	1.51642	1.47263	1.42862	1.37217	1.31417
0.833072	0.869336	0.879723	0.89808	0.875103	0.927207	0.899272	0.933243	0.938583	0.970092	0.999185	1.05531	1.04339	1.08926	1.11829	1.14229	1.16281	1.13724	1.13363	1.1445	1.12297	1.13998	1.15926	1.19106	1.20215	1.26542	1.27193	1.24414	1.18832	1.1653	1.18674	1.20167	1.26057	1.29588	1.30067	1.3777	1.4335	1.46951	1.56648	1.60674	1.60085	1.61776	1.62623	1.63467	1.62614	1.58243	1.53673	1.49081	1.4319	1.37137
0.843026	0.879723	0.890234	0.908811	0.885559	0.938285	0.910017	0.944394	0.949797	0.981683	1.01112	1.06792	1.05585	1.10228	1.13165	1.15594	1.17671	1.15083	1.14718	1.15818	1.13639	1.1536	1.17311	1.20529	1.21651	1.28054	1.28713	1.25901	1.20252	1.17922	1.20091	1.21603	1.27563	1.31136	1.31621	1.39416	1.45063	1.48707	1.58519	1.62594	1.61998	1.63709	1.64566	1.6542	1.64557	1.60134	1.55509	1.50863	1.44901	1.38776
0.860617	0.89808	0.908811	0.927775	0.904038	0.957864	0.929006	0.9641	0.969617	1.00217	1.03222	1.09021	1.07788	1.12528	1.15526	1.18006	1.20126	1.17484	1.17111	1.18234	1.1601	1.17768	1.19759	1.23044	1.2419	1.30726	1.31399	1.28528	1.22761	1.20383	1.22597	1.24141	1.30225	1.33872	1.34367	1.42326	1.4809	1.5181	1.61827	1.65987	1.65379	1.67125	1.68	1.68872	1.6799	1.63475	1.58754	1.54011	1.47924	1.41672
0.838598	0.875103	0.885559	0.904038	0.880908	0.933357	0.905237	0.939434	0.944809	0.976528	1.00581	1.06231	1.05031	1.09649	1.1257	1.14986	1.17053	1.14478	1.14115	1.15209	1.13042	1.14754	1.16695	1.19896	1.21012	1.27382	1.28037	1.2524	1.1962	1.17303	1.19461	1.20965	1.26893	1.30447	1.30929	1.38684	1.44301	1.47926	1.57687	1.6174	1.61147	1.62849	1.63701	1.64551	1.63692	1.59293	1.54693	1.5007	1.4414	1.38047
0.888528	0.927207	0.938285	0.957864	0.933357	0.988929	0.959135	0.995368	1.00106	1.03467	1.0657	1.12556	1.11284	1.16177	1.19273	1.21833	1.24022	1.21294	1.2091	1.22069	1.19773	1.21587	1.23643	1.27035	1.28217	1.34966	1.3566	1.32697	1.26742	1.24287	1.26573	1.28167	1.34448	1.38214	1.38725	1.46941	1.52893	1.56733	1.67076	1.7137	1.70742	1.72545	1.73448	1.74349	1.73439	1.68777	1.63903	1.59005	1.52722	1.46266
0.861759	0.899272	0.910017	0.929006	0.905237	0.959135	0.930239	0.96538	0.970903	1.0035	1.03359	1.09165	1.07931	1.12677	1.15679	1.18162	1.20286	1.1764	1.17267	1.18391	1.16164	1.17924	1.19918	1.23208	1.24354	1.309	1.31573	1.28699	1.22924	1.20542	1.2276	1.24305	1.30398	1.3405	1.34545	1.42514	1.48287	1.52011	1.62042	1.66207	1.65598	1.67347	1.68222	1.69096	1.68213	1.63692	1.58965	1.54215	1.4812	1.4186
0.894313	0.933243	0.944394	0.9641	0.939434	0.995368	0.96538	1.00185	1.00758	1.04141	1.07264	1.13289	1.12009	1.16934	1.20049	1.22626	1.24829	1.22084	1.21697	1.22864	1.20553	1.22379	1.24448	1.27862	1.29052	1.35845	1.36544	1.3356	1.27568	1.25096	1.27397	1.29001	1.35324	1.39114	1.39628	1.47898	1.53888	1.57754	1.68163	1.72486	1.71854	1.73669	1.74577	1.75484	1.74568	1.69876	1.6497	1.60041	1.53716	1.47219
0.89943	0.938583	0.949797	0.969617	0.944809	1.00106	0.970903	1.00758	1.01335	1.04736	1.07877	1.13937	1.1265	1.17603	1.20736	1.23328	1.25544	1.22783	1.22393	1.23567	1.21242	1.23079	1.2516	1.28594	1.2979	1.36622	1.37325	1.34325	1.28298	1.25812	1.28126	1.29739	1.36098	1.3991	1.40427	1.48744	1.54769	1.58656	1.69126	1.73473	1.72837	1.74662	1.75576	1.76488	1.75566	1.70848	1.65914	1.60956	1.54595	1.48061
0.929625	0.970092	0.981683	1.00217	0.976528	1.03467	1.0035	1.04141	1.04736	1.08253	1.11499	1.17762	1.16431	1.21551	1.2479	1.27468	1.29758	1.26905	1.26502	1.27715	1.25313	1.27211	1.29362	1.32911	1.34148	1.41209	1.41935	1.38834	1.32605	1.30036	1.32428	1.34095	1.40667	1.44607	1.45141	1.53738	1.59965	1.63983	1.74803	1.79297	1.78639	1.80526	1.81471	1.82413	1.8146	1.76583	1.71484	1.6636	1.59785	1.53032
0.957504	0.999185	1.01112	1.03222	1.00581	1.0657	1.03359	1.07264	1.07877	1.11499	1.14843	1.21294	1.19923	1.25196	1.28532	1.3129	1.3365	1.3071	1.30296	1.31545	1.29071	1.31026	1.33241	1.36897	1.38171	1.45443	1.46192	1.42998	1.36581	1.33935	1.36399	1.38116	1.44885	1.48944	1.49494	1.58348	1.64762	1.689	1.80046	1.84674	1.83997	1.8594	1.86913	1.87883	1.86902	1.81879	1.76627	1.71349	1.64577	1.57621
1.01129	1.05531	1.06792	1.09021	1.06231	1.12556	1.09165	1.13289	1.13937	1.17762	1.21294	1.28108	1.2666	1.32229	1.35752	1.38666	1.41157	1.38053	1.37615	1.38934	1.36321	1.38386	1.40726	1.44587	1.45932	1.53614	1.54404	1.5103	1.44254	1.41459	1.44061	1.45875	1.53024	1.5731	1.57892	1.67243	1.74017	1.78388	1.90159	1.95047	1.94332	1.96385	1.97412	1.98437	1.97401	1.92096	1.86549	1.80974	1.73822	1.66475
0.999861	1.04339	1.05585	1.07788	1.05031	1.11284	1.07931	1.12009	1.1265	1.16431	1.19923	1.2666	1.25228	1.30734	1.34218	1.37098	1.39562	1.36493	1.36059	1.37364	1.3478	1.36822	1.39136	1.42953	1.44283	1.51877	1.52659	1.49323	1.42623	1.3986	1.42433	1.44226	1.51295	1.55532	1.56107	1.65353	1.72051	1.76372	1.8801	1.92843	1.92136	1.94165	1.95181	1.96194	1.9517	1.89925	1.8444	1.78929	1.71858	1.64594
1.04382	1.08926	1.10228	1.12528	1.09649	1.16177	1.12677	1.16934	1.17603	1.21551	1.25196	1.32229	1.30734	1.36482	1.40119	1.43126	1.45698	1.42494	1.42042	1.43404	1.40707	1.42838	1.45253	1.49238	1.50627	1.58555	1.59371	1.55889	1.48894	1.4601	1.48696	1.50568	1.57947	1.62371	1.62971	1.72623	1.79615	1.84127	1.96277	2.01322	2.00584	2.02702	2.03763	2.04821	2.03752	1.98275	1.9255	1.86796	1.79414	1.7183
1.07164	1.11829	1.13165	1.15526	1.1257	1.19273	1.15679	1.20049	1.20736	1.2479	1.28532	1.35752	1.34218	1.40119	1.43853	1.4694	1.49581	1.46291	1.45827	1.47225	1.44456	1.46644	1.49124	1.53215	1.5464	1.6278	1.63617	1.60043	1.52862	1.499	1.52658	1.5458	1.62155	1.66698	1.67314	1.77223	1.84401	1.89033	2.01507	2.06687	2.05929	2.08104	2.09193	2.10279	2.09181	2.03559	1.97681	1.91773	1.84195	1.76409
1.09464	1.14229	1.15594	1.18006	1.14986	1.21833	1.18162	1.22626	1.23328	1.27468	1.3129	1.38666	1.37098	1.43126	1.4694	1.50094	1.52791	1.49431	1.48956	1.50385	1.47556	1.49791	1.52324	1.56503	1.57959	1.66274	1.67129	1.63478	1.56142	1.53117	1.55934	1.57897	1.65636	1.70275	1.70904	1.81027	1.88359	1.9309	2.05831	2.11122	2.10348	2.1257	2.13682	2.14791	2.1367	2.07927	2.01923	1.95889	1.88148	1.80195
1.11431	1.16281	1.17671	1.20126	1.17053	1.24022	1.20286	1.24829	1.25544	1.29758	1.3365	1.41157	1.39562	1.45698	1.49581	1.52791	1.55537	1.52116	1.51633	1.53087	1.50208	1.52483	1.55061	1.59315	1.60798	1.69262	1.70132	1.66415	1.58948	1.55869	1.58736	1.60735	1.68612	1.73335	1.73975	1.8428	1.91744	1.9656	2.0953	2.14916	2.14128	2.1639	2.17522	2.18651	2.1751	2.11664	2.05552	1.99409	1.91529	1.83433
1.0898	1.13724	1.15083	1.17484	1.14478	1.21294	1.1764	1.22084	1.22783	1.26905	1.3071	1.38053	1.36493	1.42494	1.46291	1.49431	1.52116	1.4877	1.48298	1.4972	1.46904	1.49129	1.51651	1.55811	1.57261	1.65539	1.6639	1.62755	1.55452	1.52441	1.55245	1.57199	1.64904	1.69523	1.70149	1.80227	1.87527	1.92237	2.04922	2.10189	2.09419	2.11631	2.12738	2.13842	2.12726	2.07009	2.01031	1.95024	1.87316	1.79399
1.08634	1.13363	1.14718	1.17111	1.14115	1.2091	1.17267	1.21697	1.22393	1.26502	1.30296	1.37615	1.36059	1.42042	1.45827	1.48956	1.51633	1.48298	1.47828	1.49245	1.46438	1.48656	1.5117	1.55317	1.56762	1.65014	1.65862	1.62239	1.54959	1.51957	1.54753	1.56701	1.6438	1.68985	1.69609	1.79655	1.86932	1.91627	2.04272	2.09523	2.08754	2.10959	2.12063	2.13164	2.12051	2.06352	2.00393	1.94405	1.86722	1.7883
1.09676	1.1445	1.15818	1.18234	1.15209	1.22069	1.18391	1.22864	1.23567	1.27715	1.31545	1.38934	1.37364	1.43404	1.47225	1.50385	1.53087	1.4972	1.49245	1.50676	1.47842	1.50081	1.52619	1.56806	1.58265	1.66596	1.67453	1.63795	1.56445	1.53414	1.56236	1.58203	1.65957	1.70605	1.71236	1.81378	1.88724	1.93464	2.0623	2.11532	2.10756	2.12982	2.14096	2.15208	2.14085	2.08331	2.02315	1.96269	1.88513	1.80545
1.07613	1.12297	1.13639	1.1601	1.13042	1.19773	1.16164	1.20553	1.21242	1.25313	1.29071	1.36321	1.3478	1.40707	1.44456	1.47556	1.50208	1.46904	1.46438	1.47842	1.45061	1.47258	1.49749	1.53857	1.55289	1.63463	1.64303	1.60714	1.53502	1.50529	1.53298	1.55228	1.62835	1.67396	1.68015	1.77966	1.85174	1.89826	2.02351	2.07553	2.06792	2.08976	2.10069	2.1116	2.10058	2.04412	1.98509	1.92577	1.84967	1.77149
1.09243	1.13998	1.1536	1.17768	1.14754	1.21587	1.17924	1.22379	1.23079	1.27211	1.31026	1.38386	1.36822	1.42838	1.46644	1.49791	1.52483	1.49129	1.48656	1.50081	1.47258	1.49489	1.52017	1.56187	1.57641	1.65938	1.66792	1.63148	1.55827	1.52808	1.5562	1.57579	1.65301	1.69932	1.7056	1.80662	1.87979	1.92701	2.05416	2.10696	2.09924	2.12141	2.13251	2.14358	2.13239	2.07508	2.01516	1.95494	1.87768	1.79832
1.1109	1.15926	1.17311	1.19759	1.16695	1.23643	1.19918	1.24448	1.2516	1.29362	1.33241	1.40726	1.39136	1.45253	1.49124	1.52324	1.55061	1.51651	1.5117	1.52619	1.49749	1.52017	1.54588	1.58828	1.60306	1.68745	1.69612	1.65907	1.58463	1.55393	1.58251	1.60244	1.68097	1.72805	1.73444	1.83717	1.91158	1.95959	2.0889	2.1426	2.13474	2.15729	2.16857	2.17983	2.16845	2.11017	2.04924	1.988	1.90944	1.82873
1.14138	1.19106	1.20529	1.23044	1.19896	1.27035	1.23208	1.27862	1.28594	1.32911	1.36897	1.44587	1.42953	1.49238	1.53215	1.56503	1.59315	1.55811	1.55317	1.56806	1.53857	1.56187	1.58828	1.63186	1.64704	1.73374	1.74265	1.70458	1.6281	1.59655	1.62593	1.64639	1.72708	1.77546	1.78202	1.88757	1.96402	2.01335	2.14621	2.20137	2.1933	2.21647	2.22806	2.23963	2.22794	2.16806	2.10545	2.04254	1.96182	1.8789
1.152	1.20215	1.21651	1.2419	1.21012	1.28217	1.24354	1.29052	1.2979	1.34148	1.38171	1.45932	1.44283	1.50627	1.5464	1.57959	1.60798	1.57261	1.56762	1.58265	1.55289	1.57641	1.60306	1.64704	1.66237	1.74987	1.75887	1.72044	1.64325	1.61141	1.64106	1.66172	1.74316	1.79198	1.7986	1.90513	1.9823	2.03209	2.16618	2.22186	2.21371	2.23709	2.2488	2.26047	2.24867	2.18824	2.12505	2.06155	1.98007	1.89638
1.21264	1.26542	1.28054	1.30726	1.27382	1.34966	1.309	1.35845	1.36622	1.41209	1.45443	1.53614	1.51877	1.58555	1.6278	1.66274	1.69262	1.65539	1.65014	1.66596	1.63463	1.65938	1.68745	1.73374	1.74987	1.84198	1.85145	1.811	1.72974	1.69623	1.72744	1.74918	1.83491	1.88631	1.89328	2.00541	2.08664	2.13905	2.2802	2.33881	2.33024	2.35485	2.36717	2.37946	2.36704	2.30342	2.2369	2.17006	2.0843	1.9962
1.21887	1.27193	1.28713	1.31399	1.28037	1.3566	1.31573	1.36544	1.37325	1.41935	1.46192	1.54404	1.52659	1.59371	1.63617	1.67129	1.70132	1.6639	1.65862	1.67453	1.64303	1.66792	1.69612	1.74265	1.75887	1.85145	1.86098	1.82032	1.73864	1.70496	1.73632	1.75818	1.84435	1.89601	1.90301	2.01573	2.09737	2.15005	2.29193	2.35084	2.34222	2.36696	2.37934	2.3917	2.37921	2.31527	2.24841	2.18122	2.09502	2.00647
1.19224	1.24414	1.25901	1.28528	1.2524	1.32697	1.28699	1.3356	1.34325	1.38834	1.42998	1.5103	1.49323	1.55889	1.60043	1.63478	1.66415	1.62755	1.62239	1.63795	1.60714	1.63148	1.65907	1.70458	1.72044	1.811	1.82032	1.78055	1.70066	1.66771	1.69839	1.71977	1.80405	1.85459	1.86144	1.97169	2.05155	2.10308	2.24185	2.29948	2.29105	2.31525	2.32736	2.33944	2.32723	2.26468	2.19929	2.13357	2.04925	1.96263
1.13875	1.18832	1.20252	1.22761	1.1962	1.26742	1.22924	1.27568	1.28298	1.32605	1.36581	1.44254	1.42623	1.48894	1.52862	1.56142	1.58948	1.55452	1.54959	1.56445	1.53502	1.55827	1.58463	1.6281	1.64325	1.72974	1.73864	1.70066	1.62435	1.59288	1.62218	1.6426	1.72311	1.77137	1.77792	1.88322	1.9595	2.00871	2.14126	2.1963	2.18825	2.21136	2.22293	2.23447	2.22281	2.16307	2.1006	2.03783	1.9573	1.87457
1.11669	1.1653	1.17922	1.20383	1.17303	1.24287	1.20542	1.25096	1.25812	1.30036	1.33935	1.41459	1.3986	1.4601	1.499	1.53117	1.55869	1.52441	1.51957	1.53414	1.50529	1.52808	1.55393	1.59655	1.61141	1.69623	1.70496	1.66771	1.59288	1.56202	1.59075	1.61078	1.68972	1.73705	1.74347	1.84674	1.92153	1.9698	2.09978	2.15375	2.14586	2.16852	2.17987	2.19118	2.17975	2.12116	2.05991	1.99835	1.91938	1.83825
1.13723	1.18674	1.20091	1.22597	1.19461	1.26573	1.2276	1.27397	1.28126	1.32428	1.36399	1.44061	1.42433	1.48696	1.52658	1.55934	1.58736	1.55245	1.54753	1.56236	1.53298	1.5562	1.58251	1.62593	1.64106	1.72744	1.73632	1.69839	1.62218	1.59075	1.62002	1.64041	1.72081	1.76901	1.77555	1.88071	1.95688	2.00604	2.13841	2.19337	2.18533	2.20841	2.21997	2.23149	2.21985	2.16018	2.0978	2.03512	1.95469	1.87207
1.15155	1.20167	1.21603	1.24141	1.20965	1.28167	1.24305	1.29001	1.29739	1.34095	1.38116	1.45875	1.44226	1.50568	1.5458	1.57897	1.60735	1.57199	1.56701	1.58203	1.55228	1.57579	1.60244	1.64639	1.66172	1.74918	1.75818	1.71977	1.6426	1.61078	1.64041	1.66106	1.74247	1.79128	1.7979	1.90438	1.98152	2.03129	2.16533	2.22099	2.21284	2.23621	2.24792	2.25959	2.24779	2.18738	2.12421	2.06074	1.9793	1.89564
1.20798	1.26057	1.27563	1.30225	1.26893	1.34448	1.30398	1.35324	1.36098	1.40667	1.44885	1.53024	1.51295	1.57947	1.62155	1.65636	1.68612	1.64904	1.6438	1.65957	1.62835	1.65301	1.68097	1.72708	1.74316	1.83491	1.84435	1.80405	1.72311	1.68972	1.72081	1.74247	1.82787	1.87907	1.88601	1.99772	2.07863	2.13084	2.27145	2.32984	2.32129	2.34581	2.35808	2.37033	2.35795	2.29458	2.22832	2.16173	2.0763	1.98854
1.24182	1.29588	1.31136	1.33872	1.30447	1.38214	1.3405	1.39114	1.3991	1.44607	1.48944	1.5731	1.55532	1.62371	1.66698	1.70275	1.73335	1.69523	1.68985	1.70605	1.67396	1.69932	1.72805	1.77546	1.79198	1.88631	1.89601	1.85459	1.77137	1.73705	1.76901	1.79128	1.87907	1.9317	1.93884	2.05367	2.13685	2.19053	2.33507	2.3951	2.38631	2.41152	2.42414	2.43672	2.424	2.35885	2.29073	2.22228	2.13446	2.04424
1.24641	1.30067	1.31621	1.34367	1.30929	1.38725	1.34545	1.39628	1.40427	1.45141	1.49494	1.57892	1.56107	1.62971	1.67314	1.70904	1.73975	1.70149	1.69609	1.71236	1.68015	1.7056	1.73444	1.78202	1.7986	1.89328	1.90301	1.86144	1.77792	1.74347	1.77555	1.7979	1.88601	1.93884	1.946	2.06126	2.14475	2.19862	2.3437	2.40395	2.39513	2.42043	2.43309	2.44572	2.43296	2.36757	2.2992	2.23049	2.14235	2.05179
1.32023	1.3777	1.39416	1.42326	1.38684	1.46941	1.42514	1.47898	1.48744	1.53738	1.58348	1.67243	1.65353	1.72623	1.77223	1.81027	1.8428	1.80227	1.79655	1.81378	1.77966	1.80662	1.83717	1.88757	1.90513	2.00541	2.01573	1.97169	1.88322	1.84674	1.88071	1.90438	1.99772	2.05367	2.06126	2.18335	2.27178	2.32884	2.48252	2.54633	2.53699	2.56379	2.5772	2.59058	2.57706	2.5078	2.43538	2.3626	2.26923	2.17332
1.37371	1.4335	1.45063	1.4809	1.44301	1.52893	1.48287	1.53888	1.54769	1.59965	1.64762	1.74017	1.72051	1.79615	1.84401	1.88359	1.91744	1.87527	1.86932	1.88724	1.85174	1.87979	1.91158	1.96402	1.9823	2.08664	2.09737	2.05155	1.9595	1.92153	1.95688	1.98152	2.07863	2.13685	2.14475	2.27178	2.3638	2.42317	2.58307	2.64946	2.63975	2.66763	2.68159	2.69551	2.68144	2.60937	2.53402	2.4583	2.36115	2.26135
1.40821	1.46951	1.48707	1.5181	1.47926	1.56733	1.52011	1.57754	1.58656	1.63983	1.689	1.78388	1.76372	1.84127	1.89033	1.9309	1.9656	1.92237	1.91627	1.93464	1.89826	1.92701	1.95959	2.01335	2.03209	2.13905	2.15005	2.10308	2.00871	1.9698	2.00604	2.03129	2.13084	2.19053	2.19862	2.32884	2.42317	2.48403	2.64795	2.71601	2.70606	2.73463	2.74894	2.76321	2.74879	2.67491	2.59767	2.52004	2.42045	2.31815
1.50113	1.56648	1.58519	1.61827	1.57687	1.67076	1.62042	1.68163	1.69126	1.74803	1.80046	1.90159	1.8801	1.96277	2.01507	2.05831	2.0953	2.04922	2.04272	2.0623	2.02351	2.05416	2.0889	2.14621	2.16618	2.2802	2.29193	2.24185	2.14126	2.09978	2.13841	2.16533	2.27145	2.33507	2.3437	2.48252	2.58307	2.64795	2.82267	2.89523	2.88462	2.91508	2.93034	2.94555	2.93017	2.85142	2.76908	2.68633	2.58017	2.47111
1.53972	1.60674	1.62594	1.65987	1.6174	1.7137	1.66207	1.72486	1.73473	1.79297	1.84674	1.95047	1.92843	2.01322	2.06687	2.11122	2.14916	2.10189	2.09523	2.11532	2.07553	2.10696	2.1426	2.20137	2.22186	2.33881	2.35084	2.29948	2.1963	2.15375	2.19337	2.22099	2.32984	2.3951	2.40395	2.54633	2.64946	2.71601	2.89523	2.96965	2.95877	2.99002	3.00566	3.02126	3.00549	2.92471	2.84026	2.75538	2.64649	2.53463
1.53407	1.60085	1.61998	1.65379	1.61147	1.70742	1.65598	1.71854	1.72837	1.78639	1.83997	1.94332	1.92136	2.00584	2.05929	2.10348	2.14128	2.09419	2.08754	2.10756	2.06792	2.09924	2.13474	2.1933	2.21371	2.33024	2.34222	2.29105	2.18825	2.14586	2.18533	2.21284	2.32129	2.38631	2.39513	2.53699	2.63975	2.70606	2.88462	2.95877	2.94792	2.97905	2.99464	3.01019	2.99448	2.91399	2.82984	2.74528	2.63679	2.52534
1.55028	1.61776	1.63709	1.67125	1.62849	1.72545	1.67347	1.73669	1.74662	1.80526	1.8594	1.96385	1.94165	2.02702	2.08104	2.1257	2.1639	2.11631	2.10959	2.12982	2.08976	2.12141	2.15729	2.21647	2.23709	2.35485	2.36696	2.31525	2.21136	2.16852	2.20841	2.23621	2.34581	2.41152	2.42043	2.56379	2.66763	2.73463	2.91508	2.99002	2.97905	3.01052	3.02627	3.04198	3.0261	2.94477	2.85973	2.77428	2.66464	2.55201
1.55839	1.62623	1.64566	1.68	1.63701	1.73448	1.68222	1.74577	1.75576	1.81471	1.86913	1.97412	1.95181	2.03763	2.09193	2.13682	2.17522	2.12738	2.12063	2.14096	2.10069	2.13251	2.16857	2.22806	2.2488	2.36717	2.37934	2.32736	2.22293	2.17987	2.21997	2.24792	2.35808	2.42414	2.43309	2.5772	2.68159	2.74894	2.93034	3.00566	2.99464	3.02627	3.0421	3.0579	3.04193	2.96018	2.87469	2.78879	2.67858	2.56536
1.56648	1.63467	1.6542	1.68872	1.64551	1.74349	1.69096	1.75484	1.76488	1.82413	1.87883	1.98437	1.96194	2.04821	2.10279	2.14791	2.18651	2.13842	2.13164	2.15208	2.1116	2.14358	2.17983	2.23963	2.26047	2.37946	2.3917	2.33944	2.23447	2.19118	2.23149	2.25959	2.37033	2.43672	2.44572	2.59058	2.69551	2.76321	2.94555	3.02126	3.01019	3.04198	3.0579	3.07377	3.05773	2.97554	2.88962	2.80327	2.69249	2.57868
1.5583	1.62614	1.64557	1.6799	1.63692	1.73439	1.68213	1.74568	1.75566	1.8146	1.86902	1.97401	1.9517	2.03752	2.09181	2.1367	2.1751	2.12726	2.12051	2.14085	2.10058	2.13239	2.16845	2.22794	2.24867	2.36704	2.37921	2.32723	2.22281	2.17975	2.21985	2.24779	2.35795	2.424	2.43296	2.57706	2.68144	2.74879	2.93017	3.00549	2.99448	3.0261	3.04193	3.05773	3.04177	2.96001	2.87453	2.78864	2.67843	2.56522
1.51642	1.58243	1.60134	1.63475	1.59293	1.68777	1.63692	1.69876	1.70848	1.76583	1.81879	1.92096	1.89925	1.98275	2.03559	2.07927	2.11664	2.07009	2.06352	2.08331	2.04412	2.07508	2.11017	2.16806	2.18824	2.30342	2.31527	2.26468	2.16307	2.12116	2.16018	2.18738	2.29458	2.35885	2.36757	2.5078	2.60937	2.67491	2.85142	2.92471	2.91399	2.94477	2.96018	2.97554	2.96001	2.88045	2.79727	2.71369	2.60644	2.49627
1.47263	1.53673	1.55509	1.58754	1.54693	1.63903	1.58965	1.6497	1.65914	1.71484	1.76627	1.86549	1.8444	1.9255	1.97681	2.01923	2.05552	2.01031	2.00393	2.02315	1.98509	2.01516	2.04924	2.10545	2.12505	2.2369	2.24841	2.19929	2.1006	2.05991	2.0978	2.12421	2.22832	2.29073	2.2992	2.43538	2.53402	2.59767	2.76908	2.84026	2.82984	2.85973	2.87469	2.88962	2.87453	2.79727	2.7165	2.63532	2.53118	2.42419
1.42862	1.49081	1.50863	1.54011	1.5007	1.59005	1.54215	1.60041	1.60956	1.6636	1.71349	1.80974	1.78929	1.86796	1.91773	1.95889	1.99409	1.95024	1.94405	1.96269	1.92577	1.95494	1.988	2.04254	2.06155	2.17006	2.18122	2.13357	2.03783	1.99835	2.03512	2.06074	2.16173	2.22228	2.23049	2.3626	2.4583	2.52004	2.68633	2.75538	2.74528	2.77428	2.78879	2.80327	2.78864	2.71369	2.63532	2.55657	2.45554	2.35175
1.37217	1.4319	1.44901	1.47924	1.4414	1.52722	1.4812	1.53716	1.54595	1.59785	1.64577	1.73822	1.71858	1.79414	1.84195	1.88148	1.91529	1.87316	1.86722	1.88513	1.84967	1.87768	1.90944	1.96182	1.98007	2.0843	2.09502	2.04925	1.9573	1.91938	1.95469	1.9793	2.0763	2.13446	2.14235	2.26923	2.36115	2.42045	2.58017	2.64649	2.63679	2.66464	2.67858	2.69249	2.67843	2.60644	2.53118	2.45554	2.3585	2.25881
1.31417	1.37137	1.38776	1.41672	1.38047	1.46266	1.4186	1.47219	1.48061	1.53032	1.57621	1.66475	1.64594	1.7183	1.76409	1.80195	1.83433	1.79399	1.7883	1.80545	1.77149	1.79832	1.82873	1.8789	1.89638	1.9962	2.00647	1.96263	1.87457	1.83825	1.87207	1.89564	1.98854	2.04424	2.05179	2.17332	2.26135	2.31815	2.47111	2.53463	2.52534	2.55201	2.56536	2.57868	2.56522	2.49627	2.42419	2.35175	2.25881	2.16334
1.27861	1.33427	1.35021	1.37838	1.34312	1.42309	1.38021	1.43235	1.44055	1.48891	1.53356	1.6197	1.6014	1.67181	1.71636	1.75319	1.7847	1.74545	1.73991	1.75659	1.72355	1.74966	1.77925	1.82806	1.84507	1.94219	1.95218	1.90953	1.82385	1.78851	1.82141	1.84434	1.93473	1.98893	1.99628	2.11451	2.20016	2.25542	2.40425	2.46605	2.45701	2.48296	2.49595	2.5089	2.49581	2.42873	2.35859	2.28811	2.19769	2.1048
1.25471	1.30933	1.32498	1.35263	1.31802	1.39649	1.35442	1.40559	1.41363	1.46108	1.5049	1.58944	1.57147	1.64057	1.68428	1.72043	1.75135	1.71283	1.70739	1.72377	1.69134	1.71696	1.746	1.79389	1.81059	1.90589	1.9157	1.87384	1.78976	1.75509	1.78738	1.80988	1.89858	1.95176	1.95897	2.075	2.15904	2.21327	2.35932	2.41997	2.41109	2.43656	2.44931	2.46202	2.44917	2.38334	2.31452	2.24536	2.15662	2.06547
1.17379	1.22489	1.23952	1.26539	1.23301	1.30643	1.26707	1.31493	1.32246	1.36685	1.40784	1.48693	1.47012	1.53476	1.57566	1.60947	1.6384	1.60236	1.59728	1.61259	1.58226	1.60623	1.63339	1.6782	1.69382	1.78297	1.79214	1.75299	1.67433	1.6419	1.6721	1.69315	1.77613	1.82588	1.83263	1.94117	2.0198	2.07053	2.20716	2.26389	2.25559	2.27941	2.29134	2.30323	2.29121	2.22963	2.16525	2.10054	2.01753	1.93225
1.10873	1.15699	1.17081	1.19525	1.16467	1.23401	1.19683	1.24204	1.24915	1.29109	1.3298	1.4045	1.38863	1.44969	1.48832	1.52026	1.54758	1.51354	1.50874	1.5232	1.49455	1.51719	1.54285	1.58517	1.59992	1.68414	1.6928	1.65582	1.58152	1.55088	1.57941	1.5993	1.67768	1.72467	1.73104	1.83357	1.90784	1.95576	2.08481	2.1384	2.13056	2.15306	2.16433	2.17556	2.16421	2.10604	2.04522	1.98411	1.9057	1.82515
1.0819	1.129	1.14249	1.16633	1.13649	1.20416	1.16788	1.212	1.21893	1.25985	1.29763	1.37053	1.35504	1.41461	1.45231	1.48348	1.51014	1.47692	1.47224	1.48635	1.4584	1.48049	1.50552	1.54682	1.56122	1.6434	1.65185	1.61576	1.54326	1.51336	1.5412	1.5606	1.63709	1.68294	1.68916	1.78921	1.86168	1.90844	2.03437	2.08667	2.07902	2.10097	2.11197	2.12293	2.11185	2.05509	1.99574	1.93611	1.85959	1.78099
1.06713	1.11359	1.12689	1.15041	1.12097	1.18772	1.15193	1.19545	1.20229	1.24265	1.27992	1.35182	1.33654	1.3953	1.43248	1.46323	1.48952	1.45676	1.45214	1.46606	1.43849	1.46028	1.48497	1.52571	1.53991	1.62096	1.6293	1.5937	1.52219	1.4927	1.52016	1.5393	1.61474	1.65997	1.66611	1.76479	1.83627	1.88239	2.0066	2.05818	2.05064	2.07229	2.08314	2.09395	2.08302	2.02703	1.9685	1.90968	1.83421	1.75668
1.01651	1.06076	1.07344	1.09584	1.0678	1.13138	1.09729	1.13874	1.14526	1.18371	1.21921	1.28769	1.27314	1.32912	1.36453	1.39382	1.41887	1.38766	1.38326	1.39652	1.37025	1.39101	1.41453	1.45334	1.46686	1.54407	1.55201	1.51811	1.44999	1.4219	1.44805	1.46628	1.53815	1.58123	1.58707	1.68107	1.74916	1.7931	1.91142	1.96055	1.95336	1.97399	1.98432	1.99462	1.98421	1.93088	1.87512	1.81909	1.7472	1.67335
1.04765	1.09325	1.10631	1.1294	1.1005	1.16603	1.1309	1.17362	1.18033	1.21996	1.25655	1.32713	1.31213	1.36982	1.40632	1.43651	1.46232	1.43016	1.42562	1.43929	1.41222	1.43361	1.45785	1.49785	1.51179	1.59136	1.59955	1.5646	1.4944	1.46544	1.4924	1.51119	1.58525	1.62966	1.63568	1.73256	1.80273	1.84801	1.96996	2.0206	2.01319	2.03445	2.04509	2.05571	2.04498	1.99002	1.93255	1.8748	1.80071	1.7246
1.05681	1.10282	1.116	1.13928	1.11013	1.17623	1.14079	1.18389	1.19066	1.23064	1.26754	1.33874	1.32361	1.38181	1.41863	1.44908	1.47512	1.44267	1.4381	1.45189	1.42458	1.44615	1.47061	1.51095	1.52501	1.60529	1.61354	1.57829	1.50747	1.47827	1.50546	1.52441	1.59913	1.64392	1.64999	1.74772	1.81851	1.86418	1.9872	2.03828	2.0308	2.05225	2.06299	2.0737	2.06288	2.00743	1.94946	1.89121	1.81647	1.73969
1.0885	1.13588	1.14945	1.17344	1.14341	1.21149	1.17499	1.21938	1.22636	1.26753	1.30554	1.37888	1.36329	1.42323	1.46116	1.49252	1.51934	1.48592	1.48121	1.49541	1.46728	1.48951	1.5147	1.55625	1.57073	1.65341	1.66191	1.62561	1.55267	1.52258	1.55059	1.57011	1.64706	1.6932	1.69946	1.80011	1.87302	1.92007	2.04677	2.09938	2.09168	2.11377	2.12483	2.13587	2.12472	2.06761	2.0079	1.9479	1.87092	1.79184
1.09528	1.14296	1.15662	1.18075	1.15054	1.21905	1.18232	1.22698	1.234	1.27543	1.31368	1.38747	1.37179	1.43211	1.47027	1.50182	1.52881	1.49519	1.49044	1.50474	1.47643	1.49879	1.52414	1.56595	1.58052	1.66372	1.67228	1.63574	1.56235	1.53208	1.56026	1.5799	1.65733	1.70376	1.71005	1.81134	1.8847	1.93204	2.05953	2.11247	2.10473	2.12695	2.13808	2.14918	2.13796	2.0805	2.02042	1.96005	1.88259	1.80302
0.916235	0.956119	0.967543	0.987733	0.962462	1.01977	0.989043	1.02641	1.03228	1.06693	1.09893	1.16066	1.14754	1.198	1.22992	1.25632	1.27889	1.25077	1.2468	1.25875	1.23508	1.25378	1.27499	1.30996	1.32215	1.39175	1.39891	1.36834	1.30695	1.28163	1.3052	1.32163	1.38641	1.42524	1.43051	1.51523	1.57661	1.61621	1.72285	1.76714	1.76066	1.77926	1.78857	1.79785	1.78847	1.7404	1.69014	1.63964	1.57484	1.50827
0.752721	0.785487	0.794873	0.811459	0.790698	0.837776	0.812536	0.84323	0.848055	0.876525	0.902812	0.953526	0.942749	0.9842	1.01043	1.03211	1.05066	1.02755	1.02429	1.03411	1.01466	1.03003	1.04745	1.07618	1.0862	1.14337	1.14925	1.12414	1.0737	1.0529	1.07227	1.08577	1.13898	1.17089	1.17521	1.24482	1.29524	1.32777	1.41539	1.45177	1.44645	1.46173	1.46937	1.477	1.46929	1.4298	1.38851	1.34702	1.29379	1.2391
0.965529	1.00756	1.0196	1.04087	1.01424	1.07463	1.04226	1.08163	1.08782	1.12434	1.15805	1.22311	1.20928	1.26245	1.29609	1.32391	1.3477	1.31806	1.31388	1.32648	1.30153	1.32124	1.34358	1.38044	1.39329	1.46663	1.47417	1.44196	1.37726	1.35058	1.37542	1.39274	1.461	1.50192	1.50747	1.59676	1.66143	1.70316	1.81555	1.86221	1.85539	1.87498	1.88479	1.89458	1.88469	1.83403	1.78107	1.72785	1.65957	1.58942
0.952398	0.993857	1.00573	1.02672	1.00045	1.06002	1.02808	1.06692	1.07302	1.10904	1.1423	1.20647	1.19284	1.24528	1.27847	1.3059	1.32937	1.30013	1.29601	1.30844	1.28382	1.30327	1.32531	1.36167	1.37434	1.44668	1.45412	1.42235	1.35853	1.33221	1.35672	1.3738	1.44113	1.48149	1.48697	1.57504	1.63883	1.68	1.79085	1.83689	1.83015	1.84948	1.85916	1.86881	1.85906	1.80909	1.75685	1.70435	1.637	1.5678
0.940559	0.981502	0.993229	1.01396	0.988013	1.04684	1.0153	1.05365	1.05968	1.09526	1.1281	1.19147	1.17801	1.2298	1.26257	1.28967	1.31285	1.28397	1.2799	1.29217	1.26787	1.28707	1.30883	1.34474	1.35725	1.4287	1.43604	1.40467	1.34164	1.31565	1.33985	1.35672	1.42321	1.46308	1.46848	1.55546	1.61846	1.65911	1.76859	1.81405	1.8074	1.82649	1.83605	1.84558	1.83595	1.7866	1.73501	1.68316	1.61665	1.54831
1.07977	1.12677	1.14024	1.16403	1.13425	1.20178	1.16557	1.20961	1.21653	1.25737	1.29507	1.36782	1.35236	1.41183	1.44945	1.48055	1.50716	1.47401	1.46933	1.48342	1.45552	1.47757	1.50255	1.54377	1.55814	1.64016	1.64859	1.61257	1.54022	1.51038	1.53816	1.55753	1.63386	1.67963	1.68583	1.78568	1.85801	1.90468	2.03036	2.08255	2.07492	2.09683	2.1078	2.11874	2.10769	2.05104	1.99181	1.93229	1.85593	1.77748
1.15009	1.20016	1.2145	1.23984	1.20812	1.28005	1.24148	1.28838	1.29576	1.33926	1.37942	1.45691	1.44044	1.50377	1.54384	1.57698	1.60532	1.57001	1.56503	1.58003	1.55032	1.5738	1.60041	1.64432	1.65962	1.74697	1.75596	1.7176	1.64053	1.60875	1.63834	1.65897	1.74027	1.78902	1.79563	1.90198	1.97902	2.02872	2.16259	2.21818	2.21005	2.23339	2.24508	2.25673	2.24495	2.18461	2.12153	2.05813	1.9768	1.89324
1.09625	1.14397	1.15764	1.1818	1.15156	1.22013	1.18337	1.22807	1.2351	1.27656	1.31484	1.3887	1.37301	1.43338	1.47157	1.50315	1.53016	1.49651	1.49176	1.50607	1.47774	1.50012	1.52549	1.56734	1.58192	1.66519	1.67376	1.63719	1.56373	1.53343	1.56164	1.5813	1.6588	1.70526	1.71157	1.81294	1.88637	1.93375	2.06135	2.11434	2.10659	2.12884	2.13998	2.15108	2.13986	2.08234	2.02221	1.96178	1.88426	1.80461
0.746688	0.779192	0.788502	0.804956	0.784361	0.831062	0.806024	0.836472	0.841258	0.8695	0.895576	0.945884	0.935194	0.976313	1.00233	1.02384	1.04224	1.01932	1.01608	1.02582	1.00653	1.02177	1.03905	1.06756	1.07749	1.13421	1.14004	1.11514	1.0651	1.04446	1.06368	1.07707	1.12986	1.1615	1.1658	1.23484	1.28486	1.31713	1.40405	1.44014	1.43486	1.45001	1.4576	1.46516	1.45752	1.41834	1.37739	1.33623	1.28342	1.22917
0.646386	0.674524	0.682584	0.696827	0.678999	0.719426	0.697752	0.72411	0.728253	0.752702	0.775275	0.818825	0.80957	0.845166	0.867687	0.886309	0.902235	0.882392	0.879592	0.888027	0.871324	0.88452	0.899479	0.924154	0.932754	0.981852	0.986902	0.965341	0.922026	0.904163	0.920796	0.932388	0.978084	1.00548	1.0092	1.06897	1.11227	1.1402	1.21544	1.24668	1.24211	1.25523	1.2618	1.26835	1.26173	1.22782	1.19236	1.15673	1.11102	1.06406
0.629915	0.657336	0.66519	0.679071	0.661697	0.701094	0.679972	0.705659	0.709696	0.733521	0.755519	0.79796	0.788941	0.82363	0.845577	0.863724	0.879245	0.859907	0.857179	0.865398	0.849121	0.861981	0.876559	0.900605	0.908986	0.956833	0.961754	0.940742	0.898531	0.881123	0.897333	0.908629	0.953161	0.979859	0.98348	1.04173	1.08392	1.11115	1.18447	1.21492	1.21046	1.22325	1.22965	1.23603	1.22958	1.19653	1.16198	1.12726	1.08271	1.03694
0.612938	0.63962	0.647262	0.660769	0.643863	0.682198	0.661645	0.68664	0.690569	0.713752	0.735157	0.776453	0.767678	0.801431	0.822787	0.840445	0.855548	0.836732	0.834077	0.842074	0.826236	0.83875	0.852934	0.876332	0.884488	0.931044	0.935833	0.915388	0.874314	0.857376	0.873148	0.88414	0.927471	0.95345	0.956974	1.01365	1.05471	1.0812	1.15255	1.18217	1.17784	1.19028	1.19651	1.20272	1.19644	1.16428	1.13066	1.09688	1.05353	1.009
0.603663	0.629941	0.637468	0.65077	0.63412	0.671875	0.651633	0.67625	0.680119	0.702951	0.724032	0.764704	0.756061	0.789304	0.810336	0.827727	0.842602	0.82407	0.821455	0.829332	0.813733	0.826058	0.840027	0.863072	0.871103	0.916956	0.921672	0.901536	0.861084	0.844402	0.859936	0.870761	0.913437	0.939022	0.942493	0.998315	1.03875	1.06484	1.13511	1.16428	1.16002	1.17227	1.1784	1.18452	1.17834	1.14667	1.11355	1.08028	1.03759	0.993729
0.604827	0.631155	0.638696	0.652024	0.635342	0.67317	0.652889	0.677553	0.68143	0.704306	0.725428	0.766178	0.757519	0.790825	0.811898	0.829323	0.844225	0.825658	0.823038	0.83093	0.815301	0.82765	0.841646	0.864735	0.872782	0.918723	0.923448	0.903273	0.862744	0.846029	0.861593	0.872439	0.915197	0.940832	0.944309	1.00024	1.04075	1.06689	1.13729	1.16653	1.16225	1.17453	1.18067	1.1868	1.18061	1.14887	1.1157	1.08236	1.03959	0.995644
0.605839	0.632212	0.639766	0.653116	0.636406	0.674297	0.653982	0.678687	0.68257	0.705485	0.726642	0.767461	0.758787	0.792149	0.813257	0.830711	0.845639	0.827041	0.824416	0.832322	0.816666	0.829035	0.843056	0.866183	0.874243	0.920261	0.924994	0.904786	0.864188	0.847446	0.863035	0.8739	0.916729	0.942407	0.94589	1.00191	1.04249	1.06868	1.1392	1.16848	1.1642	1.17649	1.18265	1.18879	1.18258	1.1508	1.11757	1.08417	1.04133	0.997311
0.592201	0.61798	0.625364	0.638414	0.62208	0.659118	0.639261	0.66341	0.667205	0.689604	0.710285	0.750184	0.741706	0.774317	0.79495	0.812011	0.826603	0.808423	0.805858	0.813586	0.798283	0.810373	0.824078	0.846684	0.854564	0.899545	0.904172	0.884418	0.844735	0.828369	0.843608	0.854228	0.896093	0.921193	0.924597	0.97936	1.01903	1.04462	1.11355	1.14218	1.13799	1.15001	1.15603	1.16203	1.15596	1.12489	1.09241	1.05977	1.01788	0.974861
0.593419	0.619251	0.62665	0.639726	0.623359	0.660473	0.640575	0.664773	0.668577	0.691022	0.711745	0.751726	0.743231	0.775909	0.796584	0.81368	0.828302	0.810085	0.807515	0.815258	0.799924	0.812039	0.825772	0.848425	0.85632	0.901394	0.906031	0.886236	0.846471	0.830072	0.845342	0.855984	0.897935	0.923087	0.926498	0.981373	1.02112	1.04677	1.11584	1.14453	1.14033	1.15237	1.1584	1.16442	1.15834	1.12721	1.09465	1.06194	1.01998	0.976865
0.553054	0.577129	0.584025	0.596212	0.580958	0.615548	0.597003	0.619556	0.6231	0.644019	0.663332	0.700594	0.692676	0.723132	0.742401	0.758334	0.771961	0.754983	0.752588	0.759804	0.745513	0.756804	0.769603	0.790715	0.798074	0.840082	0.844403	0.825955	0.788894	0.773611	0.787842	0.79776	0.836858	0.860299	0.863478	0.91462	0.951666	0.975569	1.03994	1.06668	1.06276	1.07399	1.07961	1.08521	1.07955	1.05053	1.0202	0.989711	0.950599	0.910419
0.529215	0.552252	0.558851	0.570512	0.555916	0.589015	0.571269	0.59285	0.596242	0.616258	0.63474	0.670395	0.662819	0.691962	0.7104	0.725646	0.738686	0.72244	0.720148	0.727053	0.713378	0.724182	0.736429	0.756632	0.763673	0.80387	0.808005	0.790352	0.754889	0.740264	0.753882	0.763373	0.800785	0.823216	0.826258	0.875196	0.910644	0.933518	0.995117	1.0207	1.01695	1.02769	1.03307	1.03844	1.03301	1.00525	0.976222	0.94705	0.909623	0.871175
0.491393	0.512784	0.518911	0.529739	0.516186	0.546919	0.530442	0.55048	0.55363	0.572216	0.589376	0.622484	0.615448	0.642509	0.659629	0.673786	0.685894	0.670809	0.66868	0.675092	0.662394	0.672427	0.683798	0.702557	0.709095	0.746419	0.750259	0.733867	0.700939	0.687359	0.700004	0.708816	0.743555	0.764382	0.767207	0.812648	0.845563	0.866801	0.923998	0.94775	0.944275	0.954248	0.959241	0.96422	0.959188	0.933407	0.906453	0.879366	0.844615	0.808914
0.48172	0.502689	0.508696	0.519311	0.506024	0.536153	0.52	0.539643	0.542731	0.560951	0.577774	0.610229	0.603333	0.62986	0.646644	0.660522	0.672391	0.657603	0.655517	0.661802	0.649354	0.659189	0.670337	0.688726	0.695135	0.731725	0.735489	0.71942	0.68714	0.673828	0.686224	0.694862	0.728917	0.749334	0.752104	0.79665	0.828917	0.849737	0.905808	0.929092	0.925686	0.935462	0.940357	0.945239	0.940305	0.915032	0.888609	0.862055	0.827987	0.79299
0.457837	0.477767	0.483476	0.493564	0.480937	0.509572	0.494219	0.512889	0.515824	0.533141	0.549129	0.579976	0.573421	0.598633	0.614585	0.627775	0.639056	0.625001	0.623018	0.628992	0.617161	0.626508	0.637104	0.654581	0.660673	0.695448	0.699025	0.683753	0.653074	0.640421	0.652203	0.660413	0.692779	0.712184	0.714816	0.757154	0.787821	0.807609	0.860901	0.88303	0.879793	0.889085	0.893737	0.898376	0.893687	0.869667	0.844554	0.819317	0.786938	0.753676
0.416773	0.434916	0.440112	0.449296	0.437801	0.463867	0.449892	0.466887	0.469558	0.485322	0.499877	0.527957	0.52199	0.544941	0.559461	0.571468	0.581738	0.568943	0.567138	0.572576	0.561807	0.570316	0.57996	0.59587	0.601415	0.633072	0.636328	0.622426	0.594498	0.58298	0.593705	0.601179	0.630643	0.648307	0.650703	0.689243	0.71716	0.735173	0.783685	0.803829	0.800882	0.809341	0.813576	0.817799	0.813531	0.791665	0.768804	0.745831	0.716356	0.686077
0.392934	0.410038	0.414938	0.423596	0.412758	0.437334	0.424158	0.440181	0.4427	0.457562	0.471284	0.497758	0.492132	0.51377	0.52746	0.538781	0.548462	0.5364	0.534698	0.539825	0.529671	0.537694	0.546787	0.561787	0.567015	0.596861	0.599931	0.586824	0.560493	0.549634	0.559745	0.566792	0.59457	0.611224	0.613483	0.649819	0.676139	0.693122	0.738858	0.757851	0.755072	0.763047	0.767039	0.771021	0.766997	0.746382	0.724829	0.703169	0.675381	0.646834
0.350932	0.366209	0.370584	0.378317	0.368638	0.390586	0.378819	0.393129	0.395379	0.408652	0.420907	0.444551	0.439527	0.458852	0.471079	0.481189	0.489836	0.479063	0.477543	0.482122	0.473054	0.480218	0.48834	0.501736	0.506405	0.533061	0.535803	0.524097	0.500581	0.490883	0.499913	0.506206	0.531015	0.545889	0.547906	0.580358	0.603865	0.619032	0.65988	0.676842	0.674361	0.681483	0.685049	0.688605	0.685011	0.6666	0.64735	0.628006	0.603188	0.577692
0.304212	0.317455	0.321248	0.327951	0.319561	0.338587	0.328387	0.340792	0.342742	0.354248	0.364872	0.385368	0.381012	0.397765	0.408364	0.417128	0.424624	0.415285	0.413967	0.417937	0.410076	0.416287	0.423327	0.43494	0.438987	0.462094	0.464471	0.454323	0.433938	0.425531	0.433359	0.438815	0.460321	0.473214	0.474963	0.503095	0.523472	0.53662	0.57203	0.586734	0.584583	0.590757	0.593848	0.596931	0.593815	0.577855	0.561168	0.544399	0.522885	0.500784
0.254433	0.265509	0.268681	0.274288	0.26727	0.283183	0.274652	0.285027	0.286658	0.296281	0.305167	0.322309	0.318666	0.332677	0.341542	0.348872	0.355141	0.347331	0.346228	0.349548	0.342974	0.348168	0.354056	0.363769	0.367154	0.38648	0.388468	0.379981	0.362931	0.3559	0.362447	0.36701	0.384997	0.395781	0.397243	0.420772	0.437814	0.448811	0.478427	0.490725	0.488926	0.494089	0.496675	0.499253	0.496647	0.483298	0.469342	0.455317	0.437324	0.418839
0.171453	0.178917	0.181055	0.184833	0.180104	0.190827	0.185078	0.192069	0.193168	0.199653	0.205641	0.217192	0.214738	0.224179	0.230153	0.235092	0.239317	0.234054	0.233311	0.235548	0.231118	0.234618	0.238586	0.245131	0.247412	0.260435	0.261775	0.256056	0.244566	0.239828	0.24424	0.247315	0.259436	0.266703	0.267688	0.283543	0.295028	0.302438	0.322395	0.330682	0.32947	0.332949	0.334691	0.336429	0.334673	0.325678	0.316273	0.306822	0.294697	0.28224
0.101379	0.105792	0.107056	0.10929	0.106494	0.112834	0.109435	0.113569	0.114219	0.118053	0.121594	0.128424	0.126973	0.132555	0.136088	0.139008	0.141506	0.138394	0.137955	0.139278	0.136658	0.138728	0.141074	0.144944	0.146293	0.153993	0.154785	0.151404	0.14461	0.141809	0.144417	0.146235	0.153402	0.157699	0.158282	0.167657	0.174447	0.178829	0.190629	0.195529	0.194813	0.19687	0.1979	0.198928	0.197889	0.19257	0.18701	0.181421	0.174252	0.166886
0.0773888	0.0807577	0.0817226	0.0834279	0.0812934	0.0861336	0.0835386	0.0866943	0.0871904	0.0901175	0.09282	0.0980341	0.0969261	0.101188	0.103884	0.106114	0.10802	0.105645	0.10531	0.106319	0.10432	0.1059	0.10769	0.110645	0.111674	0.117553	0.118157	0.115576	0.11039	0.108251	0.110243	0.11163	0.117101	0.120381	0.120826	0.127983	0.133166	0.136511	0.145519	0.14926	0.148713	0.150283	0.151069	0.151854	0.151061	0.147001	0.142756	0.13849	0.133017	0.127395
0.0668534	0.0697636	0.0705972	0.0720703	0.0702264	0.0744077	0.072166	0.0748921	0.0753206	0.0778492	0.0801839	0.0846881	0.083731	0.0874125	0.0897417	0.0916677	0.093315	0.0912627	0.0909731	0.0918455	0.0901179	0.0914828	0.0930299	0.095582	0.0964715	0.101549	0.102072	0.0998417	0.0953619	0.0935144	0.0952347	0.0964336	0.10116	0.103993	0.104378	0.11056	0.115038	0.117927	0.125709	0.12894	0.128467	0.129824	0.130503	0.131181	0.130496	0.126989	0.123322	0.119637	0.114909	0.110052
0.0658947	0.0687632	0.0695848	0.0710368	0.0692193	0.0733406	0.071131	0.0738181	0.0742405	0.0767328	0.079034	0.0834736	0.0825302	0.0861589	0.0884548	0.0903531	0.0919768	0.0899539	0.0896685	0.0905283	0.0888255	0.0901709	0.0916958	0.0942112	0.095088	0.100093	0.100608	0.0984099	0.0939943	0.0921733	0.0938689	0.0950506	0.099709	0.102502	0.102881	0.108974	0.113388	0.116236	0.123906	0.127091	0.126625	0.127962	0.128632	0.1293	0.128625	0.125168	0.121553	0.117921	0.113261	0.108474
0.0678768	0.0708316	0.0716779	0.0731736	0.0713014	0.0755467	0.0732707	0.0760386	0.0764736	0.0790409	0.0814113	0.0859845	0.0850127	0.0887506	0.0911155	0.093071	0.0947434	0.0926597	0.0923657	0.0932514	0.0914974	0.0928832	0.094454	0.0970451	0.0979482	0.103104	0.103634	0.10137	0.0968216	0.0949458	0.0966925	0.0979098	0.102708	0.105585	0.105975	0.112252	0.116799	0.119732	0.127633	0.130914	0.130434	0.131812	0.132501	0.133189	0.132494	0.128933	0.12521	0.121468	0.116668	0.111736
0.0534634	0.0557907	0.0564573	0.0576354	0.0561608	0.0595046	0.0577118	0.059892	0.0602347	0.0622568	0.0641239	0.0677259	0.0669605	0.0699046	0.0717674	0.0733076	0.0746249	0.0729837	0.0727521	0.0734497	0.0720682	0.0731597	0.074397	0.0764379	0.0771492	0.0812101	0.0816278	0.0798444	0.0762618	0.0747844	0.0761601	0.0771189	0.0808984	0.0831644	0.0834718	0.0884157	0.0919968	0.0943076	0.100531	0.103115	0.102737	0.103822	0.104365	0.104907	0.104359	0.101554	0.0986217	0.0956747	0.0918937	0.0880095
0.0352473	0.0367816	0.0372211	0.0379978	0.0370256	0.0392301	0.0380482	0.0394855	0.0397114	0.0410446	0.0422755	0.0446503	0.0441456	0.0460866	0.0473147	0.0483301	0.0491986	0.0481166	0.0479639	0.0484238	0.047513	0.0482326	0.0490483	0.0503939	0.0508628	0.0535401	0.0538155	0.0526397	0.0502778	0.0493037	0.0502107	0.0508428	0.0533346	0.0548285	0.0550311	0.0582906	0.0606516	0.062175	0.0662777	0.0679813	0.0677321	0.0684474	0.0688056	0.0691628	0.0688018	0.0669526	0.0650192	0.0630763	0.0605835	0.0580228
0.0214478	0.0223815	0.0226489	0.0231215	0.0225299	0.0238714	0.0231522	0.0240268	0.0241643	0.0249755	0.0257245	0.0271695	0.0268625	0.0280435	0.0287908	0.0294087	0.0299372	0.0292788	0.0291859	0.0294657	0.0289115	0.0293494	0.0298457	0.0306645	0.0309498	0.0325789	0.0327465	0.0320311	0.0305939	0.0300011	0.0305531	0.0309377	0.0324539	0.033363	0.0334863	0.0354696	0.0369062	0.0378332	0.0403297	0.0413664	0.0412147	0.04165	0.0418679	0.0420853	0.0418656	0.0407404	0.0395639	0.0383817	0.0368649	0.0353067
0.0154799	0.0161538	0.0163468	0.0166879	0.0162609	0.0172291	0.01671	0.0173413	0.0174405	0.018026	0.0185666	0.0196095	0.0193879	0.0202404	0.0207797	0.0212257	0.0216071	0.0211319	0.0210648	0.0212668	0.0208668	0.0211829	0.0215411	0.022132	0.022338	0.0235138	0.0236347	0.0231184	0.0220811	0.0216533	0.0220516	0.0223292	0.0234235	0.0240796	0.0241686	0.0256001	0.026637	0.0273061	0.0291079	0.0298561	0.0297467	0.0300608	0.0302181	0.030375	0.0302164	0.0294043	0.0285552	0.0277019	0.0266071	0.0254825
0.0103199	0.0107692	0.0108979	0.0111253	0.0108406	0.0114861	0.01114	0.0115609	0.011627	0.0120173	0.0123777	0.013073	0.0129253	0.0134936	0.0138531	0.0141504	0.0144047	0.0140879	0.0140432	0.0141779	0.0139112	0.0141219	0.0143607	0.0147547	0.014892	0.0156759	0.0157565	0.0154122	0.0147207	0.0144355	0.0147011	0.0148861	0.0156157	0.0160531	0.0161124	0.0170667	0.017758	0.018204	0.0194053	0.0199041	0.0198311	0.0200405	0.0201454	0.02025	0.0201443	0.0196029	0.0190368	0.0184679	0.0177381	0.0169883
0.00561241	0.00585673	0.00592671	0.00605038	0.00589558	0.0062466	0.00605841	0.00628727	0.00632324	0.00653552	0.00673152	0.00710965	0.0070293	0.00733837	0.00753391	0.0076956	0.00783389	0.0076616	0.00763729	0.00771052	0.00756549	0.00768007	0.00780996	0.0080242	0.00809888	0.00852518	0.00856903	0.00838182	0.00800573	0.00785062	0.00799505	0.0080957	0.00849246	0.00873034	0.0087626	0.0092816	0.00965754	0.00990011	0.0105534	0.0108247	0.010785	0.0108989	0.0109559	0.0110128	0.0109553	0.0106608	0.010353	0.0100436	0.00964671	0.00923896
[truncated: 50 more columns]

## Sheet: Bulgaria
Household
3.02764	3.04248	2.95343	2.94516	2.84548	2.09776	2.12882	2.10226	2.14517	1.94166	0.854567	0.955036	0.999761	1.08235	1.18829	0.264123	0.282382	0.30163	0.305768	0.305925	2.4387	2.50834	2.39125	2.50121	2.60582	3.61511	3.70888	3.74981	3.8854	3.86066	3.90325	3.94388	3.97761	3.93363	3.69116	2.73026	2.77278	2.86499	2.91982	2.87714	1.84873	1.82557	1.92437	1.96617	1.94825	0	0	0	0	0
3.04248	3.06105	3.04171	2.96731	2.88615	2.14053	2.18213	2.10521	2.19302	1.96069	0.89032	0.990519	1.00397	1.0392	1.20153	0.251868	0.24908	0.281101	0.317348	0.313368	2.54247	2.60013	2.58171	2.61202	2.62702	3.68684	3.79343	3.73339	3.98659	3.93149	3.96563	4.01112	3.99347	3.98625	3.75642	2.71009	2.80527	2.89805	2.99362	2.94934	1.91385	1.83735	1.88259	1.94272	1.95579	0	0	0	0	0
2.95343	3.04171	2.93958	2.88267	2.7619	2.08468	2.10262	2.0478	2.13262	1.91945	0.885621	0.945749	0.961714	1.02553	1.12355	0.243301	0.265495	0.277053	0.294502	0.311345	2.41788	2.54668	2.52033	2.51367	2.49393	3.63872	3.64929	3.73631	3.89237	3.8348	3.78578	3.84425	3.9601	3.90944	3.65957	2.79128	2.72437	2.82274	2.89056	2.88348	1.82172	1.77214	1.84421	1.91183	1.92835	0	0	0	0	0
2.94516	2.96731	2.88267	2.854	2.84123	2.05799	2.13891	2.00447	2.10348	1.85959	0.85441	0.925129	0.952495	1.06412	1.13704	0.231473	0.271701	0.279684	0.305745	0.318068	2.49103	2.4638	2.51902	2.45975	2.50344	3.65559	3.55035	3.66953	3.84447	3.67043	3.81086	3.85423	3.75898	3.82005	3.69008	2.65981	2.71261	2.76385	2.92362	2.79643	1.81777	1.84983	1.81149	1.96788	1.87816	0	0	0	0	0
2.84548	2.88615	2.7619	2.84123	2.60791	1.96431	2.04447	1.97366	2.05828	1.81084	0.80078	0.897583	0.934461	1.00437	1.07959	0.245527	0.267631	0.260773	0.288004	0.301113	2.33502	2.4696	2.42501	2.44302	2.42424	3.51393	3.45838	3.51505	3.72012	3.63962	3.66973	3.7284	3.71156	3.8382	3.48328	2.54052	2.57569	2.66208	2.76277	2.68569	1.70974	1.76789	1.78003	1.80915	1.85876	0	0	0	0	0
2.09776	2.14053	2.08468	2.05799	1.96431	2.79958	2.85015	2.75834	2.96007	2.51309	1.34205	1.50318	1.49311	1.62987	1.76366	0.461778	0.478013	0.514395	0.585812	0.558806	0.13123	0.1353	0.137031	0.134693	0.145216	3.5513	3.55391	3.67322	3.87616	3.81749	3.98663	4.03738	4.04971	4.16947	3.8424	2.4962	2.62106	2.65846	2.73867	2.63608	1.95747	1.91873	1.97973	2.0731	2.05491	1.62223	1.68485	1.71536	1.62137	1.64021
2.12882	2.18213	2.10262	2.13891	2.04447	2.85015	2.83547	2.79583	2.9233	2.5391	1.33681	1.48645	1.54116	1.69324	1.80079	0.455414	0.488019	0.542076	0.561167	0.591006	0.144879	0.132129	0.142653	0.136042	0.144587	3.68664	3.77531	3.76231	3.97671	3.90647	4.09016	4.12847	4.02749	4.17693	3.99331	2.50767	2.60951	2.6194	2.79803	2.75962	2.01007	1.93008	2.07586	2.12918	2.08917	1.60628	1.70093	1.70464	1.65121	1.67448
2.10226	2.10521	2.0478	2.00447	1.97366	2.75834	2.79583	2.68801	2.75944	2.48732	1.30519	1.46217	1.52241	1.65483	1.73873	0.445925	0.471447	0.522625	0.545381	0.550621	0.133411	0.124821	0.125968	0.135704	0.14335	3.67549	3.65107	3.71153	3.90215	3.76744	3.98402	4.0366	4.01316	4.12058	3.84076	2.48381	2.57159	2.68627	2.69075	2.61508	1.97281	1.91835	1.94679	2.09309	2.04474	1.60779	1.68894	1.65681	1.65258	1.59423
2.14517	2.19302	2.13262	2.10348	2.05828	2.96007	2.9233	2.75944	2.86529	2.55086	1.3671	1.53723	1.54451	1.67556	1.80283	0.470412	0.480846	0.542795	0.570139	0.596335	0.141169	0.147127	0.14778	0.137031	0.14661	3.75026	3.72215	3.82264	3.93981	3.96988	4.10419	4.15532	4.12917	4.22496	3.91072	2.57769	2.7026	2.69466	2.79803	2.70067	2.01776	2.03181	2.06518	2.15591	2.13462	1.68768	1.74707	1.70479	1.688	1.64916
1.94166	1.96069	1.91945	1.85959	1.81084	2.51309	2.5391	2.48732	2.55086	2.23824	1.20839	1.33631	1.37045	1.55002	1.64152	0.42101	0.422921	0.475854	0.541244	0.536814	0.11016	0.109508	0.113556	0.129993	0.114995	3.33242	3.35052	3.45602	3.55211	3.48627	3.69019	3.66141	3.73688	3.77164	3.47597	2.32047	2.31867	2.4139	2.52192	2.47016	1.81059	1.77036	1.80135	1.87232	1.8854	1.4525	1.5178	1.53954	1.44901	1.52047
0.854567	0.89032	0.885621	0.85441	0.80078	1.34205	1.33681	1.30519	1.3671	1.20839	1.88228	2.12751	2.15825	2.39191	2.6234	0.914628	0.975588	1.04802	1.08658	1.13292	0.309051	0.296211	0.291287	0.312851	0.307859	0.0895627	0.102582	0.101166	0.108046	0.102807	3.95567	3.8961	3.96432	4.04572	3.77596	2.45156	2.4986	2.58356	2.71231	2.6308	1.73927	1.72013	1.76247	1.86975	1.90369	1.95687	1.99172	1.98958	1.98066	2.00065
0.955036	0.990519	0.945749	0.925129	0.897583	1.50318	1.48645	1.46217	1.53723	1.33631	2.12751	2.36654	2.41379	2.65407	2.81139	1.04165	1.06038	1.20189	1.22696	1.22381	0.333111	0.333921	0.317011	0.32668	0.339003	0.0980175	0.107777	0.110745	0.117558	0.102582	4.3776	4.48513	4.46651	4.4834	4.13796	2.71422	2.84793	2.91741	2.96866	2.94637	2.02646	1.8834	1.94594	1.9476	2.07177	2.16842	2.228	2.31302	2.24593	2.24001
0.999761	1.00397	0.961714	0.952495	0.934461	1.49311	1.54116	1.52241	1.54451	1.37045	2.15825	2.41379	2.44965	2.6939	2.86958	1.03581	1.06407	1.18988	1.27416	1.26802	0.31438	0.35155	0.323555	0.337631	0.328996	0.106337	0.111105	0.103594	0.130263	0.109283	4.37169	4.47935	4.46318	4.56651	4.20583	2.85771	2.87327	2.8902	3.05793	2.96481	2.00492	1.93478	2.00966	2.10775	2.09509	2.24642	2.28564	2.23756	2.25688	2.17525
1.08235	1.0392	1.02553	1.06412	1.00437	1.62987	1.69324	1.65483	1.67556	1.55002	2.39191	2.65407	2.6939	2.97601	3.14373	1.11988	1.18266	1.27893	1.3894	1.44533	0.3634	0.363243	0.377589	0.381749	0.359083	0.116052	0.119672	0.124664	0.128217	0.118458	4.85125	4.90535	4.9557	4.99498	4.74431	3.1033	3.11626	3.21052	3.34643	3.2078	2.18537	2.1482	2.19922	2.22043	2.30005	2.49932	2.52534	2.55347	2.40686	2.53793
1.18829	1.20153	1.12355	1.13704	1.07959	1.76366	1.80079	1.73873	1.80283	1.64152	2.6234	2.81139	2.86958	3.14373	3.42465	1.17686	1.30238	1.41744	1.52131	1.5046	0.365334	0.416085	0.373069	0.388697	0.381839	0.106787	0.128621	0.128284	0.145711	0.126148	5.28726	5.28566	5.36133	5.32497	5.0536	3.27611	3.36091	3.50855	3.59038	3.53167	2.34543	2.32353	2.32622	2.45296	2.46858	2.67213	2.67161	2.65158	2.65335	2.58358
0.264123	0.251868	0.243301	0.231473	0.245527	0.461778	0.455414	0.445925	0.470412	0.42101	0.914628	1.04165	1.03581	1.11988	1.17686	3.01968	3.1548	3.52254	3.82406	3.76919	1.4818	1.49403	1.45722	1.49043	1.53271	0.768895	0.718638	0.715737	0.74841	0.7646	0.406619	0.410082	0.39162	0.438099	0.385841	3.94222	4.03651	4.1298	4.42019	4.2557	2.84503	2.78908	2.79866	3.00371	2.99652	2.55588	2.64438	2.65236	2.56577	2.56492
0.282382	0.24908	0.265495	0.271701	0.267631	0.478013	0.488019	0.471447	0.480846	0.422921	0.975588	1.06038	1.06407	1.18266	1.30238	3.1548	3.47565	3.74762	3.9717	4.03358	1.62157	1.64388	1.55944	1.56455	1.66951	0.814092	0.778024	0.812136	0.812383	0.780115	0.395758	0.447903	0.410644	0.484601	0.413769	4.20924	4.31792	4.44407	4.53075	4.44809	3.08988	2.93812	3.10636	3.16957	3.23166	2.77503	2.83606	2.87788	2.74071	2.78807
0.30163	0.281101	0.277053	0.279684	0.260773	0.514395	0.542076	0.522625	0.542795	0.475854	1.04802	1.20189	1.18988	1.27893	1.41744	3.52254	3.74762	4.13342	4.24342	4.43379	1.75539	1.77536	1.734	1.87497	1.80722	0.91573	0.876851	0.887307	0.900889	0.946356	0.494855	0.467377	0.497058	0.491324	0.450377	4.61467	4.80927	4.91738	4.95957	4.8043	3.34166	3.24252	3.33066	3.40158	3.55494	2.98338	3.12763	3.18493	3.02501	2.979
0.305768	0.317348	0.294502	0.305745	0.288004	0.585812	0.561167	0.545381	0.570139	0.541244	1.08658	1.22696	1.27416	1.3894	1.52131	3.82406	3.9717	4.24342	4.57928	4.63927	1.80194	1.84599	1.88707	1.86888	1.91203	0.918743	0.92749	0.918563	1.01348	0.943118	0.519904	0.476259	0.484983	0.523817	0.444958	4.87803	4.9351	5.09626	5.31141	5.10896	3.47563	3.45497	3.48467	3.66497	3.71016	3.15745	3.2784	3.17513	3.21274	3.20559
0.305925	0.313368	0.311345	0.318068	0.301113	0.558806	0.591006	0.550621	0.596335	0.536814	1.13292	1.22381	1.26802	1.44533	1.5046	3.76919	4.03358	4.43379	4.63927	4.8058	1.82831	1.94198	1.90054	1.98003	1.951	0.944715	0.983166	0.940127	1.02638	0.991463	0.504209	0.561616	0.529911	0.508549	0.479047	4.9382	5.03107	5.27561	5.34408	5.23466	3.58213	3.57385	3.57682	3.78722	3.84749	3.27494	3.34782	3.34011	3.24663	3.24099
2.4387	2.54247	2.41788	2.49103	2.33502	0.13123	0.144879	0.133411	0.141169	0.11016	0.309051	0.333111	0.31438	0.3634	0.365334	1.4818	1.62157	1.75539	1.80194	1.82831	3.59672	3.74848	3.57057	3.61579	3.78126	2.16736	2.28269	2.23237	2.32355	2.36004	1.26469	1.2521	1.25511	1.32217	1.25727	0.765409	0.822839	0.848788	0.908129	0.891647	2.69997	2.57937	2.60218	2.82308	2.79925	2.69986	2.74503	2.67908	2.66482	2.74008
2.50834	2.60013	2.54668	2.4638	2.4696	0.1353	0.132129	0.124821	0.147127	0.109508	0.296211	0.333921	0.35155	0.363243	0.416085	1.49403	1.64388	1.77536	1.84599	1.94198	3.74848	3.88886	3.82385	3.8767	3.88569	2.25933	2.3059	2.27206	2.46703	2.27082	1.30616	1.29633	1.36586	1.31648	1.23623	0.84663	0.895402	0.870487	0.920452	0.92432	2.68607	2.76527	2.822	2.82414	2.96949	2.69493	2.82506	2.83722	2.76563	2.80547
2.39125	2.58171	2.52033	2.51902	2.42501	0.137031	0.142653	0.125968	0.14778	0.113556	0.291287	0.317011	0.323555	0.377589	0.373069	1.45722	1.55944	1.734	1.88707	1.90054	3.57057	3.82385	3.74625	3.94276	3.81675	2.18162	2.23603	2.25935	2.34313	2.28991	1.26105	1.31169	1.29201	1.28504	1.2163	0.862797	0.878627	0.873478	0.916202	0.910221	2.66033	2.7106	2.74438	2.86659	2.85004	2.73637	2.78434	2.81231	2.74348	2.74591
2.50121	2.61202	2.51367	2.45975	2.44302	0.134693	0.136042	0.135704	0.137031	0.129993	0.312851	0.32668	0.337631	0.381749	0.388697	1.49043	1.56455	1.87497	1.86888	1.98003	3.61579	3.8767	3.94276	3.91535	3.85016	2.24172	2.25582	2.26234	2.37057	2.46083	1.34369	1.26512	1.35097	1.2669	1.26858	0.846922	0.876626	0.909996	0.924499	0.885081	2.77734	2.67607	2.77042	2.91197	2.90484	2.82018	2.89607	2.80745	2.74298	2.81852
2.60582	2.62702	2.49393	2.50344	2.42424	0.145216	0.144587	0.14335	0.14661	0.114995	0.307859	0.339003	0.328996	0.359083	0.381839	1.53271	1.66951	1.80722	1.91203	1.951	3.78126	3.88569	3.81675	3.85016	4.00799	2.26313	2.25186	2.23486	2.43092	2.33783	1.27454	1.36375	1.30596	1.3165	1.27002	0.838512	0.843504	0.938598	0.933539	0.89909	2.82985	2.76713	2.76327	2.90279	2.92492	2.85764	2.92863	2.88555	2.77276	2.79234
3.61511	3.68684	3.63872	3.65559	3.51393	3.5513	3.68664	3.67549	3.75026	3.33242	0.0895627	0.0980175	0.106337	0.116052	0.106787	0.768895	0.814092	0.91573	0.918743	0.944715	2.16736	2.25933	2.18162	2.24172	2.26313	3.72111	3.65321	3.68107	3.94663	3.76991	2.20568	2.31516	2.23646	2.34217	2.19367	1.50858	1.61786	1.66167	1.67817	1.6788	1.33892	1.37719	1.40076	1.41265	1.37926	1.98776	2.02412	2.10314	2.01452	2.04895
3.70888	3.79343	3.64929	3.55035	3.45838	3.55391	3.77531	3.65107	3.72215	3.35052	0.102582	0.107777	0.111105	0.119672	0.128621	0.718638	0.778024	0.876851	0.92749	0.983166	2.28269	2.3059	2.23603	2.25582	2.25186	3.65321	3.70294	3.72536	3.91036	3.80638	2.28789	2.35534	2.30857	2.28548	2.16239	1.51108	1.63547	1.65067	1.76088	1.66025	1.40262	1.32361	1.33415	1.47888	1.43719	2.06253	2.10743	2.07256	2.06523	2.1024
3.74981	3.73339	3.73631	3.66953	3.51505	3.67322	3.76231	3.71153	3.82264	3.45602	0.101166	0.110745	0.103594	0.124664	0.128284	0.715737	0.812136	0.887307	0.918563	0.940127	2.23237	2.27206	2.25935	2.26234	2.23486	3.68107	3.72536	3.74	3.91803	3.85407	2.29594	2.32982	2.31494	2.34086	2.23237	1.62076	1.67844	1.67518	1.70291	1.73212	1.44328	1.37512	1.36874	1.46583	1.48331	2.03539	2.13619	2.10258	2.04213	2.11724
3.8854	3.98659	3.89237	3.84447	3.72012	3.87616	3.97671	3.90215	3.93981	3.55211	0.108046	0.117558	0.130263	0.128217	0.145711	0.74841	0.812383	0.900889	1.01348	1.02638	2.32355	2.46703	2.34313	2.37057	2.43092	3.94663	3.91036	3.91803	4.04824	4.08669	2.40958	2.4501	2.42082	2.45087	2.26884	1.73967	1.75467	1.7958	1.87697	1.79458	1.4869	1.46239	1.53887	1.53343	1.54458	2.15045	2.21762	2.186	2.21579	2.26895
3.86066	3.93149	3.8348	3.67043	3.63962	3.81749	3.90647	3.76744	3.96988	3.48627	0.102807	0.102582	0.109283	0.118458	0.126148	0.7646	0.780115	0.946356	0.943118	0.991463	2.36004	2.27082	2.28991	2.46083	2.33783	3.76991	3.80638	3.85407	4.08669	4.03475	2.41313	2.45804	2.43985	2.47362	2.34516	1.66693	1.69701	1.70913	1.76315	1.76845	1.41861	1.44483	1.41099	1.48551	1.50255	2.16412	2.12459	2.1352	2.13433	2.14478
3.90325	3.96563	3.78578	3.81086	3.66973	3.98663	4.09016	3.98402	4.10419	3.69019	3.95567	4.3776	4.37169	4.85125	5.28726	0.406619	0.395758	0.494855	0.519904	0.504209	1.26469	1.30616	1.26105	1.34369	1.27454	2.20568	2.28789	2.29594	2.40958	2.41313	2.90941	3.05653	3.01289	3.04952	2.8804	2.18256	2.31042	2.32845	2.37646	2.3524	1.69139	1.5757	1.62425	1.74012	1.69267	1.68584	1.68044	1.69701	1.6723	1.64051
3.94388	4.01112	3.84425	3.85423	3.7284	4.03738	4.12847	4.0366	4.15532	3.66141	3.8961	4.48513	4.47935	4.90535	5.28566	0.410082	0.447903	0.467377	0.476259	0.561616	1.2521	1.29633	1.31169	1.26512	1.36375	2.31516	2.35534	2.32982	2.4501	2.45804	3.05653	2.97493	3.07328	3.05361	2.88681	2.1739	2.23612	2.36054	2.3575	2.33481	1.73308	1.60675	1.68028	1.69355	1.76598	1.67406	1.72672	1.75669	1.68244	1.72699
3.97761	3.99347	3.9601	3.75898	3.71156	4.04971	4.02749	4.01316	4.12917	3.73688	3.96432	4.46651	4.46318	4.9557	5.36133	0.39162	0.410644	0.497058	0.484983	0.529911	1.25511	1.36586	1.29201	1.35097	1.30596	2.23646	2.30857	2.31494	2.42082	2.43985	3.01289	3.07328	2.97484	3.09548	2.89517	2.14013	2.25281	2.32636	2.42932	2.33342	1.64503	1.64552	1.71017	1.69965	1.75231	1.67682	1.74295	1.66722	1.72006	1.7059
3.93363	3.98625	3.90944	3.82005	3.8382	4.16947	4.17693	4.12058	4.22496	3.77164	4.04572	4.4834	4.56651	4.99498	5.32497	0.438099	0.484601	0.491324	0.523817	0.508549	1.32217	1.31648	1.28504	1.2669	1.3165	2.34217	2.28548	2.34086	2.45087	2.47362	3.04952	3.05361	3.09548	3.06928	2.99281	2.21649	2.27077	2.35728	2.43762	2.30875	1.62002	1.73243	1.72699	1.72532	1.74646	1.76978	1.81178	1.74959	1.75321	1.7823
3.69116	3.75642	3.65957	3.69008	3.48328	3.8424	3.99331	3.84076	3.91072	3.47597	3.77596	4.13796	4.20583	4.74431	5.0536	0.385841	0.413769	0.450377	0.444958	0.479047	1.25727	1.23623	1.2163	1.26858	1.27002	2.19367	2.16239	2.23237	2.26884	2.34516	2.8804	2.88681	2.89517	2.99281	2.74139	2.11407	2.16477	2.23059	2.288	2.23135	1.5967	1.54708	1.57222	1.63824	1.60595	1.56223	1.66744	1.67941	1.5679	1.64822
2.73026	2.71009	2.79128	2.65981	2.54052	2.4962	2.50767	2.48381	2.57769	2.32047	2.45156	2.71422	2.85771	3.1033	3.27611	3.94222	4.20924	4.61467	4.87803	4.9382	0.765409	0.84663	0.862797	0.846922	0.838512	1.50858	1.51108	1.62076	1.73967	1.66693	2.18256	2.1739	2.14013	2.21649	2.11407	2.31644	2.4224	2.45089	2.48001	2.39832	1.7128	1.73715	1.68876	1.81122	1.82696	1.48153	1.49428	1.52648	1.47944	1.54253
2.77278	2.80527	2.72437	2.71261	2.57569	2.62106	2.60951	2.57159	2.7026	2.31867	2.4986	2.84793	2.87327	3.11626	3.36091	4.03651	4.31792	4.80927	4.9351	5.03107	0.822839	0.895402	0.878627	0.876626	0.843504	1.61786	1.63547	1.67844	1.75467	1.69701	2.31042	2.23612	2.25281	2.27077	2.16477	2.4224	2.38997	2.48864	2.58351	2.51331	1.76369	1.79384	1.75928	1.84194	1.86047	1.58391	1.55036	1.61035	1.62931	1.55677
2.86499	2.89805	2.82274	2.76385	2.66208	2.65846	2.6194	2.68627	2.69466	2.4139	2.58356	2.91741	2.8902	3.21052	3.50855	4.1298	4.44407	4.91738	5.09626	5.27561	0.848788	0.870487	0.873478	0.909996	0.938598	1.66167	1.65067	1.67518	1.7958	1.70913	2.32845	2.36054	2.32636	2.35728	2.23059	2.45089	2.48864	2.62356	2.61362	2.53863	1.83753	1.76839	1.83058	1.92694	1.95064	1.59906	1.64363	1.63405	1.59218	1.61361
2.91982	2.99362	2.89056	2.92362	2.76277	2.73867	2.79803	2.69075	2.79803	2.52192	2.71231	2.96866	3.05793	3.34643	3.59038	4.42019	4.53075	4.95957	5.31141	5.34408	0.908129	0.920452	0.916202	0.924499	0.933539	1.67817	1.76088	1.70291	1.87697	1.76315	2.37646	2.3575	2.42932	2.43762	2.288	2.48001	2.58351	2.61362	2.61502	2.6554	1.9194	1.78993	1.89982	1.96516	1.99948	1.70857	1.66412	1.76265	1.67491	1.68458
2.87714	2.94934	2.88348	2.79643	2.68569	2.63608	2.75962	2.61508	2.70067	2.47016	2.6308	2.94637	2.96481	3.2078	3.53167	4.2557	4.44809	4.8043	5.10896	5.23466	0.891647	0.92432	0.910221	0.885081	0.89909	1.6788	1.66025	1.73212	1.79458	1.76845	2.3524	2.33481	2.33342	2.30875	2.23135	2.39832	2.51331	2.53863	2.6554	2.56168	1.85975	1.7817	1.89393	1.94688	1.9966	1.6005	1.6233	1.64543	1.61447	1.59187
1.84873	1.91385	1.82172	1.81777	1.70974	1.95747	2.01007	1.97281	2.01776	1.81059	1.73927	2.02646	2.00492	2.18537	2.34543	2.84503	3.08988	3.34166	3.47563	3.58213	2.69997	2.68607	2.66033	2.77734	2.82985	1.33892	1.40262	1.44328	1.4869	1.41861	1.69139	1.73308	1.64503	1.62002	1.5967	1.7128	1.76369	1.83753	1.9194	1.85975	1.84846	1.79514	1.8454	1.97108	1.95322	1.72537	1.76794	1.74379	1.69429	1.72128
1.82557	1.83735	1.77214	1.84983	1.76789	1.91873	1.93008	1.91835	2.03181	1.77036	1.72013	1.8834	1.93478	2.1482	2.32353	2.78908	2.93812	3.24252	3.45497	3.57385	2.57937	2.76527	2.7106	2.67607	2.76713	1.37719	1.32361	1.37512	1.46239	1.44483	1.5757	1.60675	1.64552	1.73243	1.54708	1.73715	1.79384	1.76839	1.78993	1.7817	1.79514	1.83551	1.82609	1.86308	1.88187	1.66625	1.78736	1.76423	1.65663	1.66958
1.92437	1.88259	1.84421	1.81149	1.78003	1.97973	2.07586	1.94679	2.06518	1.80135	1.76247	1.94594	2.00966	2.19922	2.32622	2.79866	3.10636	3.33066	3.48467	3.57682	2.60218	2.822	2.74438	2.77042	2.76327	1.40076	1.33415	1.36874	1.53887	1.41099	1.62425	1.68028	1.71017	1.72699	1.57222	1.68876	1.75928	1.83058	1.89982	1.89393	1.8454	1.82609	1.89168	1.96563	1.92511	1.68998	1.7421	1.79894	1.67505	1.7291
1.96617	1.94272	1.91183	1.96788	1.80915	2.0731	2.12918	2.09309	2.15591	1.87232	1.86975	1.9476	2.10775	2.22043	2.45296	3.00371	3.16957	3.40158	3.66497	3.78722	2.82308	2.82414	2.86659	2.91197	2.90279	1.41265	1.47888	1.46583	1.53343	1.48551	1.74012	1.69355	1.69965	1.72532	1.63824	1.81122	1.84194	1.92694	1.96516	1.94688	1.97108	1.86308	1.96563	1.93049	2.04416	1.76902	1.84551	1.86649	1.80747	1.82719
1.94825	1.95579	1.92835	1.87816	1.85876	2.05491	2.08917	2.04474	2.13462	1.8854	1.90369	2.07177	2.09509	2.30005	2.46858	2.99652	3.23166	3.55494	3.71016	3.84749	2.79925	2.96949	2.85004	2.90484	2.92492	1.37926	1.43719	1.48331	1.54458	1.50255	1.69267	1.76598	1.75231	1.74646	1.60595	1.82696	1.86047	1.95064	1.99948	1.9966	1.95322	1.88187	1.92511	2.04416	2.11267	1.7419	1.86544	1.85961	1.81734	1.8096
0	0	0	0	0	1.62223	1.60628	1.60779	1.68768	1.4525	1.95687	2.16842	2.24642	2.49932	2.67213	2.55588	2.77503	2.98338	3.15745	3.27494	2.69986	2.69493	2.73637	2.82018	2.85764	1.98776	2.06253	2.03539	2.15045	2.16412	1.68584	1.67406	1.67682	1.76978	1.56223	1.48153	1.58391	1.59906	1.70857	1.6005	1.72537	1.66625	1.68998	1.76902	1.7419	2.22816	2.3191	2.23214	2.17424	2.27619
0	0	0	0	0	1.68485	1.70093	1.68894	1.74707	1.5178	1.99172	2.228	2.28564	2.52534	2.67161	2.64438	2.83606	3.12763	3.2784	3.34782	2.74503	2.82506	2.78434	2.89607	2.92863	2.02412	2.10743	2.13619	2.21762	2.12459	1.68044	1.72672	1.74295	1.81178	1.66744	1.49428	1.55036	1.64363	1.66412	1.6233	1.76794	1.78736	1.7421	1.84551	1.86544	2.3191	2.46849	2.30799	2.25213	2.23041
0	0	0	0	0	1.71536	1.70464	1.65681	1.70479	1.53954	1.98958	2.31302	2.23756	2.55347	2.65158	2.65236	2.87788	3.18493	3.17513	3.34011	2.67908	2.83722	2.81231	2.80745	2.88555	2.10314	2.07256	2.10258	2.186	2.1352	1.69701	1.75669	1.66722	1.74959	1.67941	1.52648	1.61035	1.63405	1.76265	1.64543	1.74379	1.76423	1.79894	1.86649	1.85961	2.23214	2.30799	2.23684	2.19783	2.25967
0	0	0	0	0	1.62137	1.65121	1.65258	1.688	1.44901	1.98066	2.24593	2.25688	2.40686	2.65335	2.56577	2.74071	3.02501	3.21274	3.24663	2.66482	2.76563	2.74348	2.74298	2.77276	2.01452	2.06523	2.04213	2.21579	2.13433	1.6723	1.68244	1.72006	1.75321	1.5679	1.47944	1.62931	1.59218	1.67491	1.61447	1.69429	1.65663	1.67505	1.80747	1.81734	2.17424	2.25213	2.19783	2.19587	2.26034
0	0	0	0	0	1.64021	1.67448	1.59423	1.64916	1.52047	2.00065	2.24001	2.17525	2.53793	2.58358	2.56492	2.78807	2.979	3.20559	3.24099	2.74008	2.80547	2.74591	2.81852	2.79234	2.04895	2.1024	2.11724	2.26895	2.14478	1.64051	1.72699	1.7059	1.7823	1.64822	1.54253	1.55677	1.61361	1.68458	1.59187	1.72128	1.66958	1.7291	1.82719	1.8096	2.27619	2.23041	2.25967	2.26034	2.21377
0	0	0	0	0	0	0	0	0	0	1.15723	1.25098	1.28911	1.3742	1.5017	2.53854	2.75729	3.02411	3.17115	3.27474	2.40603	2.44207	2.44248	2.50535	2.50755	2.14256	2.21078	2.16277	2.32251	2.27219	1.72625	1.73897	1.71509	1.76906	1.61579	1.46538	1.52918	1.54476	1.5648	1.59261	1.60415	1.57015	1.5556	1.60763	1.6705	2.12668	2.12938	2.18778	2.0118	2.11908
0	0	0	0	0	0	0	0	0	0	1.15015	1.27254	1.30153	1.45702	1.52704	2.67049	2.97012	3.0121	3.29313	3.3648	2.46611	2.61099	2.49512	2.56033	2.50859	2.10431	2.20116	2.20837	2.40239	2.32924	1.75566	1.78842	1.76058	1.84344	1.72501	1.5513	1.57298	1.60131	1.67864	1.60779	1.62034	1.61391	1.67149	1.71716	1.75701	2.1679	2.23005	2.24064	2.22142	2.26445
0	0	0	0	0	0	0	0	0	0	1.1973	1.2899	1.31335	1.44006	1.5464	2.60888	2.91075	3.03283	3.22363	3.30323	2.50438	2.57857	2.56494	2.61695	2.55457	2.22805	2.2739	2.25224	2.42714	2.42721	1.75071	1.80942	1.821	1.84524	1.72395	1.52463	1.50363	1.59661	1.67469	1.63012	1.63129	1.53448	1.63383	1.70023	1.68793	2.21501	2.23118	2.30637	2.30943	2.20846
0	0	0	0	0	0	0	0	0	0	1.12912	1.24736	1.30899	1.37431	1.50725	2.5843	2.69466	3.05352	3.14868	3.2518	2.43135	2.44237	2.44255	2.45069	2.487	2.20905	2.17579	2.17129	2.32242	2.27329	1.72582	1.7271	1.75357	1.74374	1.6408	1.43845	1.44703	1.52767	1.60864	1.61739	1.60046	1.49489	1.57012	1.59783	1.68663	2.18681	2.15279	2.12675	2.11371	2.17491
0	0	0	0	0	0	0	0	0	0	1.16528	1.26197	1.29278	1.40069	1.48657	2.67098	2.8151	3.07659	3.2266	3.29534	2.47538	2.58491	2.54362	2.50715	2.5601	2.16192	2.199	2.27797	2.34473	2.36607	1.69836	1.75968	1.76414	1.76982	1.73072	1.44937	1.55357	1.64042	1.63243	1.55751	1.61498	1.5319	1.62207	1.66149	1.70412	2.25926	2.25117	2.23109	2.2211	2.1925
0	0.000337294	0	0	0	0	0	0	0	0	0.000674587	0	0	0	0.000337294	1.57952	1.70722	1.90416	1.98754	2.10033	2.36247	2.46049	2.36681	2.45404	2.43195	1.97337	2.01971	1.96739	2.09594	2.1451	1.75429	1.73693	1.80119	1.81185	1.65975	1.2687	1.30611	1.35709	1.41814	1.40557	1.44739	1.4518	1.54285	1.54975	1.59816	2.03858	2.13563	2.13469	1.98192	2.14631
0	0.00089945	0	0	0	0	0	0	0.000224863	0	0.000674587	0	0	0.000449724	0	1.55884	1.66065	1.77707	1.90231	1.97247	2.29301	2.39472	2.2871	2.36949	2.32814	1.98817	2.0181	1.94315	1.99518	2.02932	1.71579	1.79427	1.76171	1.81484	1.66562	1.26802	1.3389	1.32165	1.36287	1.38657	1.49405	1.45733	1.46381	1.53289	1.45421	2.00467	1.98864	2.03903	1.99266	1.94198
0	0	0	0	0	0	0	0.000674587	0	0	0	0	0	0	0	1.77084	1.91828	2.02905	2.18976	2.241	2.58423	2.69315	2.62997	2.77874	2.72718	2.1616	2.2419	2.28843	2.39215	2.34662	1.98853	1.93429	2.00678	2.01875	1.88365	1.46511	1.46491	1.60412	1.56214	1.50862	1.56338	1.67635	1.59158	1.72116	1.61829	2.1683	2.31984	2.34889	2.14991	2.32319
0	0	0	0	0	0	0	0	0.000224863	0	0	0	0.000674587	0.000449724	0.000337294	1.72625	1.80663	2.03199	2.09907	2.15499	2.52302	2.62873	2.58783	2.65153	2.65378	2.16644	2.15164	2.15438	2.26329	2.19902	1.88183	1.92912	1.92824	1.95001	1.84715	1.34322	1.43033	1.46437	1.45203	1.50316	1.55715	1.5668	1.57968	1.63711	1.61271	2.13012	2.21269	2.17853	2.23779	2.19673
0.000449724	0.000224863	0	0	0.000224863	0	0	0.000674587	0	0	0	0.000674587	0	0.000674587	0	1.52951	1.76917	1.84234	1.95916	2.01263	2.44918	2.49262	2.49764	2.51684	2.54652	2.03921	2.0594	2.08117	2.14852	2.09241	1.81367	1.90087	1.88311	1.88102	1.70913	1.31934	1.31542	1.44991	1.44328	1.40164	1.5173	1.4968	1.54476	1.62542	1.60612	2.03721	2.09693	2.12837	2.12342	2.08854
0	0.000674587	0	0	0.000269835	0	0	0	0.000224863	0	0	0	0	0.000787018	0	0.000337294	0	0	0	0	1.71932	1.84108	1.84266	1.83656	1.86665	1.99853	2.10026	2.00332	2.11551	2.09504	1.49709	1.5033	1.47478	1.46345	1.42259	1.31428	1.33485	1.41326	1.46511	1.41216	1.20407	1.1832	1.19955	1.26591	1.25001	1.89712	1.91079	1.95203	1.88824	1.96181
0.000449724	0.000449724	0	0	0	0	0	0	0	0	0	0	0	0.000674587	0	0	0	0	0	0	1.81995	1.93708	1.8691	1.90137	1.88916	2.06026	2.13197	2.19394	2.32373	2.23077	1.57055	1.58317	1.57856	1.53122	1.45605	1.38832	1.46433	1.48468	1.49347	1.44791	1.23476	1.22076	1.23575	1.30186	1.27389	2.00222	2.01587	2.02259	1.97589	1.98812
0	0.000224863	0	0	0.000269835	0	0	0	0.000224863	0	0	0	0	0.000224863	0	0	0	0	0.000674587	0	1.64946	1.647	1.68328	1.73016	1.69067	1.85943	1.89822	1.9024	2.0415	1.90159	1.35821	1.42176	1.37886	1.41596	1.2982	1.24542	1.28561	1.27171	1.34749	1.29336	1.11525	1.06272	1.13524	1.09297	1.12625	1.75411	1.80259	1.78078	1.75658	1.71975
0	0	0	0	0	0	0.000674587	0	0.000224863	0	0	0	0	0	0	0	0	0	0	0	1.49529	1.53304	1.53091	1.48524	1.62407	1.64278	1.69971	1.71105	1.7698	1.72233	1.23749	1.23288	1.25577	1.23944	1.1949	1.14893	1.1564	1.18435	1.19384	1.2076	1.00055	0.913459	1.05852	1.01519	1.06317	1.57363	1.63821	1.61822	1.55785	1.62639
0	0	0	0	0	0	0.000674587	0	0	0	0	0	0	0.000449724	0	0	0	0	0	0	1.45839	1.52769	1.46954	1.51622	1.51168	1.66549	1.72481	1.64721	1.77693	1.74478	1.23153	1.2575	1.21289	1.24295	1.16953	1.13524	1.14057	1.2132	1.18012	1.16007	0.968527	0.938846	0.981659	1.06801	1.02112	1.58661	1.63799	1.63432	1.52338	1.59623
0	0	0	0	0.000224863	0	0	0	0	0	0	0	0	0	0.000337294	0	0	0	0	0.00134917	0	0	0	0.000269835	0	1.40107	1.41047	1.40409	1.48807	1.45529	1.22433	1.27117	1.22071	1.32588	1.24617	0.965582	0.920115	0.987169	0.947256	1.0063	0.942084	0.94386	0.969539	1.0144	1.02279	1.11127	1.10994	1.10974	1.07574	1.07257
0	0	0	0	0.000224863	0	0	0	0	0	0	0	0	0	0	0	0	0	0	0	0	0.000562157	0	0	0	1.2915	1.35129	1.40586	1.44285	1.39071	1.18343	1.19636	1.21311	1.2555	1.15748	0.866103	0.904059	0.912154	0.942983	0.897156	0.92342	0.914426	0.914133	0.987416	0.96918	1.05667	1.14626	1.08896	1.04033	1.0278
0	0.00134917	0	0	0.000494698	0	0	0	0	0	0	0	0	0	0	0	0	0	0	0.000674587	0	0.000224863	0	0	0	1.32363	1.29901	1.32824	1.43487	1.40024	1.20486	1.20942	1.21334	1.20398	1.12013	0.816048	0.910311	0.87051	0.921194	0.903992	0.860863	0.898348	0.905723	0.931628	0.923353	0.959488	1.05629	1.04678	1.06185	1.02254
0	0	0	0	0.000494698	0	0	0	0	0	0	0	0	0.000224863	0	0.00134917	0	0	0	0	0	0	0	0	0	1.27585	1.2839	1.24448	1.33026	1.32406	1.08462	1.1676	1.10533	1.16198	1.0171	0.844561	0.863854	0.877053	0.919665	0.866935	0.869003	0.836376	0.840648	0.914223	0.899023	0.966032	1.00388	0.937834	0.985122	0.954474
0	0	0	0	0	0	0	0	0	0	0	0	0	0	0	0	0	0	0	0	0	0	0	0	0	1.19917	1.24475	1.28947	1.30962	1.31421	1.06553	1.12748	1.12971	1.18437	1.02787	0.808965	0.831721	0.853241	0.882405	0.844269	0.872983	0.789874	0.80955	0.905633	0.90669	0.945232	0.953597	1.03383	1.01267	0.936957
0	0	0	0	0	0	0	0	0	0	0	0	0	0	0	0	0	0	0	0	0	0	0	0	0	0	0	0.000674587	0	0	1.04177	0.991598	1.04237	1.03711	0.954698	0.961737	1.01539	1.08087	1.09429	1.04347	0.770963	0.749759	0.782836	0.800465	0.822772	0.889668	0.908871	0.921306	0.879999	0.930908
0	0	0	0	0	0	0	0	0	0	0.000674587	0	0	0	0	0	0	0	0	0	0	0	0	0	0	0	0	0	0	0	1.08363	1.07448	1.05035	1.04451	1.01431	1.01991	1.0513	1.0929	1.13306	1.12751	0.775326	0.765904	0.786636	0.8545	0.808898	0.903048	0.963266	0.882697	0.878785	0.974149
0	0	0	0	0	0	0	0	0	0	0	0	0	0	0	0	0	0	0	0	0	0	0	0	0	0	0	0	0	0	0.964772	0.960815	1.01404	0.992453	0.939835	0.997063	0.958026	1.04136	1.02357	1.00093	0.762531	0.71965	0.731815	0.782611	0.808538	0.842132	0.905364	0.885688	0.830192	0.92432
0	0	0	0	0	0	0	0	0	0	0	0	0	0	0	0	0	0	0	0	0	0	0	0	0	0	0	0	0	0	1.07376	1.07271	1.03981	1.10547	1.0605	1.01777	1.04784	1.12957	1.15721	1.09733	0.809482	0.812405	0.835162	0.813867	0.852813	0.893941	0.933134	0.944602	0.91953	0.942174
0	0	0	0.00134917	0	0	0	0	0	0	0	0	0	0	0	0	0	0	0	0	0	0	0	0	0	0	0	0.000674587	0	0	0.983841	1.00167	0.966121	0.964413	0.929491	0.950808	0.985887	1.03275	1.05447	1.03052	0.732804	0.718795	0.747623	0.800982	0.785444	0.863157	0.923173	0.888342	0.842087	0.89005
0	0	0	0	0	0	0	0	0	0	0	0	0	0	0	0	0	0	0	0	0	0	0	0	0	0	0	0	0	0	0	0	0	0	0	0.96086	0.952832	0.94377	0.969607	1.01793	1.04655	1.0061	1.08714	1.11422	1.10565	0.866148	0.911143	0.874557	0.879415	0.863134
0	0	0	0	0	0	0	0	0	0	0	0	0	0	0	0	0	0	0	0	0	0	0	0	0	0	0	0	0	0	0	0	0	0	0	0.785152	0.832823	0.798284	0.847934	0.83316	0.897696	0.873366	0.847079	0.880381	0.879774	0.73566	0.796215	0.802332	0.777102	0.701796
0	0	0	0	0	0	0	0.000674587	0	0	0	0	0	0	0	0	0	0	0	0	0	0	0	0	0	0	0	0	0	0	0	0	0	0	0	0.777147	0.832666	0.864461	0.919935	0.819084	0.900934	0.871882	0.902171	0.928524	0.893513	0.796395	0.804738	0.807481	0.767545	0.763116
0	0	0	0	0	0	0	0	0	0	0.00134917	0	0	0	0	0	0	0	0	0	0	0	0	0	0	0	0	0	0	0	0	0	0	0	0	0.696039	0.724394	0.753019	0.739123	0.775865	0.766399	0.734693	0.790999	0.796868	0.791134	0.71549	0.70346	0.679354	0.652753	0.651134
0	0	0	0	0	0	0	0	0	0	0	0	0	0	0	0	0	0.000674587	0	0	0	0	0	0	0	0	0	0	0	0	0	0	0	0	0	0.669236	0.675352	0.716187	0.728352	0.705551	0.705798	0.72291	0.715355	0.750254	0.777507	0.634989	0.639756	0.619991	0.618619	0.593704
0	0.000337294	0	0	0	0	0	0.000674587	0.00134917	0	0	0	0	0.000674587	0	0	0.00134917	0.00269835	0	0.00134917	0	0	0	0.00134917	0	0	0	0.000449724	0	0.00134917	0	0	0	0	0	0	0.00134917	0	0	0	0.692351	0.677713	0.741012	0.775011	0.743643	0.904194	0.898618	0.916022	0.876132	0.864011
0	0	0	0	0	0	0	0	0.000224863	0	0	0	0.00134917	0	0	0	0	0	0.00202376	0	0.00134917	0	0.000674587	0.00161901	0.000269835	0	0	0.00134917	0.000674587	0	0.000449724	0	0.000674587	0	0	0	0	0	0	0.000674587	0.725181	0.714253	0.708631	0.760282	0.770154	0.881034	0.939858	0.91998	0.861875	0.88263
0.00134917	0.000674587	0	0	0.00134917	0	0	0	0	0	0	0	0.000674587	0	0	0.000674587	0	0	0.00202376	0	0	0	0	0	0.000674587	0	0.000269835	0.00134917	0	0	0.00134917	0.0017989	0.00134917	0	0	0.000449724	0	0	0	0	0.624735	0.632291	0.611244	0.634382	0.685516	0.717963	0.783038	0.773707	0.725451	0.736065
0	0.000224863	0	0	0	0	0.000674587	0	0	0	0.00202376	0.00269835	0	0.00134917	0	0.000269835	0.00134917	0	0	0	0.000674587	0	0.000674587	0	0	0.00134917	0	0	0.000674587	0	0	0.00134917	0	0	0	0	0	0	0	0	0.564495	0.509111	0.549114	0.575086	0.581045	0.628198	0.683469	0.698693	0.70654	0.669348
0	0	0.00134917	0	0	0	0	0	0	0	0	0.00134917	0	0.000337294	0	0.00134917	0	0.00134917	0	0.000674587	0	0	0	0	0.00202376	0	0	0.000674587	0.00101188	0	0	0	0	0	0	0	0.000337294	0	0	0	0.425979	0.407676	0.439561	0.432186	0.448331	0.519387	0.558333	0.51932	0.516959	0.489076
0.000449724	0	0	0	0	0	0	0	0	0	0	0	0	0	0	0	0	0.00134917	0	0	0	0	0	0.00134917	0	0.000674587	0	0	0	0	0	0.000674587	0	0	0	0	0	0	0	0	0	0	0	0.00269835	0	0.628288	0.639149	0.663569	0.64531	0.612683
0	0	0	0	0.000269835	0	0.000674587	0	0	0	0	0	0	0.000449724	0	0.00134917	0	0	0	0	0	0	0	0	0.000674587	0	0	0.00134917	0	0.000674587	0	0	0.000674587	0	0	0	0	0	0	0.000337294	0.000674587	0	0	0.000337294	0	0.55532	0.548395	0.549159	0.511202	0.51869
0	0	0	0	0	0	0	0	0	0	0	0	0	0	0.000337294	0.000337294	0	0	0	0	0	0	0.00134917	0.000269835	0.000674587	0	0	0	0	0	0	0	0	0.000674587	0	0	0	0.000449724	0	0	0	0	0.000674587	0	0	0.400165	0.434951	0.387798	0.413859	0.446397
0	0	0	0	0.000224863	0	0	0	0	0	0	0	0	0	0	0	0	0	0	0.000674587	0	0	0	0	0	0	0	0	0	0	0	0	0	0	0	0	0.000449724	0	0	0	0	0	0	0	0	0.303879	0.301518	0.300978	0.280988	0.31845
0	0	0	0	0	0	0	0	0	0	0	0	0.00134917	0	0	0	0	0	0	0	0	0	0	0	0.00168647	0	0	0	0	0	0	0	0	0	0	0	0	0	0	0	0	0	0	0	0	0.129656	0.141259	0.146453	0.138965	0.122752
0	0	0	0	0	0	0	0	0	0	0	0.000674587	0	0	0	0	0	0	0	0	0.000674587	0	0	0	0	0	0	0	0	0	0	0	0	0	0	0	0	0	0	0	0	0.000449724	0	0	0	0	0	0	0	0
0	0	0	0	0	0	0	0	0	0	0	0	0	0	0	0	0	0	0	0	0	0	0	0	0	0	0	0	0	0	0	0	0	0	0	0	0	0	0	0	0	0	0	0	0	0	0	0	0	0
0	0	0	0	0	0	0	0	0	0	0	0	0	0	0	0	0	0	0	0	0	0.000337294	0	0	0	0	0	0	0	0	0.000449724	0	0	0.00134917	0	0	0	0	0	0	0	0	0	0	0	0	0	0	0	0
0	0	0	0	0	0	0	0	0	0	0	0	0	0	0	0	0	0	0	0	0	0.000224863	0	0	0	0	0	0	0	0	0	0	0	0	0	0	0	0	0	0.00134917	0	0	0	0	0	0	0	0	0	0
0	0	0	0	0	0	0	0	0	0	0	0	0	0	0	0	0	0	0	0	0	0	0	0	0	0	0	0	0	0	0	0	0	0	0	0	0	0	0	0	0	0	0	0	0	0	0	0	0	0
0	0	0	0	0	0	0	0	0	0	0	0	0	0	0	0	0	0	0	0	0	0	0	0	0	0	0	0	0	0	0.00134917	0	0	0	0	0	0	0	0	0	0	0	0	0	0	0	0	0	0	0
0	0	0	0	0	0	0	0	0	0	0	0	0	0	0	0	0	0.000674587	0	0	0	0	0	0	0	0	0	0	0	0	0	0	0	0	0	0	0	0	0	0	0	0	0	0	0	0	0	0	0	0
0	0	0	0	0	0	0	0	0	0	0	0	0	0	0	0	0	0	0	0	0	0	0	0	0	0	0	0	0	0	0	0	0	0	0	0	0	0	0	0	0	0	0	0	0	0	0	0	0	0
0	0	0	0	0	0	0	0	0	0	0	0	0	0	0	0	0	0	0	0	0	0	0	0	0	0	0	0	0	0	0.000224863	0	0	0	0	0	0	0	0	0	0	0	0	0	0	0	0	0	0	0
0	0	0	0	0	0	0	0	0	0	0	0	0	0	0	0	0	0	0	0	0	0	0	0	0	0	0	0	0	0	0	0	0	0	0	0	0	0	0	0	0	0	0	0	0	0	0	0	0	0
School
0.282138	0.270423	0.263449	4.04883	4.36282	4.81406	5.64302	0	0	0	0	0	0	0	0	0	0	0	0	0	0.0009049	0.00211983	0.0011673	0.00140248	0.00271166	0.012268	0.0129203	0.0139958	0.0164462	0.0157486	0.0200177	0.0257455	0.0261133	0.0266745	0.0240562	0.0264653	0.0318843	0.032913	0.0373061	0.03158	0.0433649	0.0411912	0.0474822	0.0481322	0.0413142	0.0651713	0.0614187	0.059047	0.0635559	0.062002
0.270423	0.268386	0.257257	4.03198	4.29479	4.78177	5.58142	0	0	0	0	0	0	0	0	0	0	0	0	0	0.000708187	0.00193163	0.00187593	0.0013691	0.00207813	0.0129147	0.0120888	0.0123715	0.0165935	0.0150564	0.0209678	0.0233414	0.024912	0.0252821	0.0245794	0.0263953	0.0313111	0.0351767	0.0369664	0.0302547	0.0445043	0.0403929	0.0468544	0.050312	0.0435872	0.0600791	0.0627858	0.0630462	0.0628737	0.0583741
0.263449	0.257257	0.251946	3.93687	4.25886	4.6941	5.47132	0	0	0	0	0	0	0	0	0	0	0	0	0	0.00143661	0.00301062	0.00183563	0.000868768	0.00282805	0.0119505	0.0124278	0.0147838	0.0154952	0.0160081	0.0205949	0.0252611	0.0247924	0.0242489	0.0247531	0.0264248	0.0312833	0.0318208	0.0339177	0.0277133	0.0378223	0.039467	0.0436301	0.046986	0.041939	0.0648274	0.0640916	0.0655601	0.0633767	0.0554848
4.04883	4.03198	3.93687	60.2102	64.7797	71.7829	83.77	0	0	0	0	0	0	0	0	0	0	0	0	0	0.0169932	0.0292304	0.0281904	0.0180167	0.0320589	0.198706	0.190189	0.198053	0.249317	0.220556	0.319018	0.360278	0.353612	0.368714	0.364373	0.408688	0.491763	0.5112	0.535254	0.452284	0.634643	0.629042	0.65908	0.70638	0.643999	0.977888	0.939443	0.945798	0.929825	0.894068
4.36282	4.29479	4.25886	64.7797	69.4891	77.1405	89.8938	0	0	0	0	0	0	0	0	0	0	0	0	0	0.0195124	0.0322136	0.0320185	0.0193022	0.0397626	0.203694	0.208952	0.212915	0.264765	0.242652	0.343443	0.391467	0.381282	0.395367	0.392745	0.447554	0.521826	0.54494	0.564526	0.498022	0.681848	0.680598	0.714743	0.759218	0.681206	1.05077	1.01103	1.00352	0.994786	0.959471
4.81406	4.78177	4.6941	71.7829	77.1405	85.7013	99.8474	0	0	0	0	0	0	0	0	0	0	0	0	0	0.0226819	0.0325148	0.0320405	0.0223694	0.0413223	0.221643	0.238594	0.240932	0.301161	0.268675	0.380043	0.427485	0.424494	0.449278	0.429089	0.49683	0.580383	0.608023	0.62959	0.540864	0.739925	0.750916	0.793445	0.822163	0.763661	1.14683	1.10501	1.12222	1.12974	1.06992
5.64302	5.58142	5.47132	83.77	89.8938	99.8474	116.419	0	0	0	0	0	0	0	0	0	0	0	0	0	0.0259751	0.0413847	0.038332	0.0258016	0.0494424	0.270445	0.277805	0.276094	0.338169	0.315846	0.448544	0.506845	0.497653	0.513453	0.506888	0.581718	0.676791	0.714571	0.732289	0.641368	0.875722	0.870004	0.911846	0.968615	0.910672	1.34161	1.29936	1.30155	1.2972	1.22664
0	0	0	0	0	0	0	59.8356	61.7967	54.9491	49.0571	54.453	55.2745	60.7383	65.2874	0	0	0	0	0	0.0386954	0.0556988	0.049765	0.0446084	0.0636803	0.228385	0.286274	0.295451	0.302656	0.278816	0.667437	0.615658	0.626352	0.616474	0.605879	1.00659	1.0489	1.06336	1.06605	1.04823	1.203	1.13236	1.13548	1.19854	1.18564	1.18355	1.23573	1.18465	1.20807	1.23057
0	0	0	0	0	0	0	61.7967	63.7913	56.8268	50.752	56.3277	57.1936	62.8616	67.5107	0	0	0	0	0	0.0387875	0.0565298	0.0531429	0.0470268	0.0683741	0.235374	0.299964	0.31054	0.311979	0.290183	0.697215	0.640333	0.646394	0.639249	0.633167	1.03099	1.09255	1.10692	1.10412	1.08176	1.23042	1.16526	1.17075	1.2422	1.22738	1.22327	1.28007	1.22802	1.24958	1.27571
0	0	0	0	0	0	0	54.9491	56.8268	50.557	45.0727	50.046	50.7512	55.842	59.9523	0	0	0	0	0	0.0356998	0.0499088	0.0455773	0.0413541	0.060878	0.21171	0.265457	0.272517	0.282773	0.259678	0.612871	0.570623	0.577994	0.566095	0.561036	0.928809	0.969671	0.972512	0.987218	0.96921	1.09854	1.03741	1.04289	1.11002	1.09476	1.08612	1.14609	1.09814	1.11732	1.12941
0	0	0	0	0	0	0	49.0571	50.752	45.0727	40.733	45.3401	45.9625	50.5206	54.2725	0	0	0	0	0	0.0310195	0.0450944	0.0426136	0.0369912	0.0527702	0.186754	0.238504	0.245536	0.251111	0.228612	0.552579	0.502254	0.519355	0.510653	0.500971	0.827066	0.87005	0.879297	0.877689	0.863091	0.983407	0.933629	0.926988	0.974032	0.976654	0.967476	1.01457	0.969249	0.99204	1.01039
0	0	0	0	0	0	0	54.453	56.3277	50.046	45.3401	50.4404	51.1498	56.232	60.3809	0	0	0	0	0	0.0339609	0.0511128	0.0453897	0.0423368	0.0596765	0.209327	0.263759	0.272385	0.283471	0.257562	0.616362	0.558561	0.57599	0.561539	0.558804	0.90979	0.966403	0.973024	0.980276	0.959296	1.09022	1.03146	1.03875	1.08343	1.08076	1.0714	1.12963	1.08261	1.11106	1.12515
0	0	0	0	0	0	0	55.2745	57.1936	50.7512	45.9625	51.1498	51.9722	57.117	61.3541	0	0	0	0	0	0.0343436	0.0519967	0.0463451	0.0415582	0.0601046	0.216896	0.270108	0.276346	0.278111	0.259842	0.622909	0.569124	0.58371	0.570637	0.568001	0.925237	0.980407	0.985941	1.00524	0.968835	1.10857	1.04803	1.05278	1.10302	1.10249	1.09857	1.14982	1.09302	1.12665	1.14203
0	0	0	0	0	0	0	60.7383	62.8616	55.842	50.5206	56.232	57.117	62.7381	67.4085	0	0	0	0	0	0.0375864	0.0569863	0.0502709	0.0466578	0.0678205	0.238201	0.294066	0.305602	0.309546	0.285793	0.689072	0.623528	0.644752	0.631724	0.618373	1.01859	1.0757	1.0906	1.09162	1.06958	1.21432	1.14998	1.1592	1.2083	1.20708	1.19456	1.26229	1.20916	1.23238	1.2514
0	0	0	0	0	0	0	65.2874	67.5107	59.9523	54.2725	60.3809	61.3541	67.4085	72.2907	0	0	0	0	0	0.0406824	0.0606092	0.0543973	0.0505564	0.0707243	0.249745	0.317718	0.329212	0.327527	0.304539	0.742048	0.671381	0.688005	0.674741	0.671581	1.08832	1.15383	1.16575	1.17426	1.14587	1.29545	1.23504	1.23743	1.29425	1.30369	1.28863	1.36128	1.29261	1.32715	1.34798
0	0	0	0	0	0	0	0	0	0	0	0	0	0	0	123.83	132.599	117.596	116.638	0	0.090638	0.0918519	0.101723	0.110878	0.136405	0.488193	0.48624	0.520618	0.597294	0.561152	1.0958	1.15754	1.07289	1.08696	1.04946	1.24541	1.2608	1.43501	1.38151	1.23182	1.35518	1.31334	1.3208	1.4472	1.35634	1.6797	1.64317	1.70231	1.59958	1.57824
0	0	0	0	0	0	0	0	0	0	0	0	0	0	0	132.599	141.966	125.921	124.922	0	0.0967906	0.0992362	0.108214	0.119983	0.14242	0.52553	0.520868	0.556746	0.639695	0.604667	1.17089	1.23828	1.14461	1.16508	1.12472	1.33051	1.35897	1.53591	1.48092	1.31412	1.45325	1.40836	1.41494	1.54243	1.45365	1.79683	1.7564	1.82605	1.72133	1.69166
0	0	0	0	0	0	0	0	0	0	0	0	0	0	0	117.596	125.921	111.731	110.73	0	0.0878222	0.0872945	0.0954168	0.106279	0.129417	0.465806	0.460419	0.490988	0.566244	0.534145	1.03835	1.09309	1.01786	1.03539	0.999543	1.17913	1.20105	1.36699	1.30915	1.16787	1.28527	1.25049	1.25643	1.36742	1.29082	1.59431	1.5576	1.62027	1.52544	1.50372
0	0	0	0	0	0	0	0	0	0	0	0	0	0	0	116.638	124.922	110.73	109.877	0	0.0858787	0.0872292	0.0960379	0.104184	0.126535	0.460252	0.459456	0.488001	0.561779	0.530269	1.03771	1.09096	1.0118	1.02403	0.994171	1.17356	1.19379	1.34957	1.29608	1.15711	1.2771	1.24276	1.25155	1.35617	1.28072	1.58028	1.55167	1.60776	1.50852	1.49413
0	0	0	0	0	0	0	0	0	0	0	0	0	0	0	0	0	0	0	51.3373	42.2677	41.7718	36.5196	27.7181	20.009	15.3023	11.8613	9.53196	8.01089	6.68625	4.44147	4.54085	4.57843	4.76746	4.37673	0.394374	0.424499	0.465436	0.501018	0.463512	0.47236	0.487931	0.44336	0.505541	0.456111	0.7105	0.701988	0.720011	0.681965	0.735848
0.0009049	0.000708187	0.00143661	0.0169932	0.0195124	0.0226819	0.0259751	0.0386954	0.0387875	0.0356998	0.0310195	0.0339609	0.0343436	0.0375864	0.0406824	0.090638	0.0967906	0.0878222	0.0858787	42.2677	35.0607	34.5606	30.2959	22.938	16.5878	12.6483	9.84297	7.88523	6.62364	5.52501	3.69538	3.77316	3.78917	3.9428	3.61076	0.332888	0.356674	0.386128	0.411112	0.390358	0.390848	0.406163	0.370586	0.414429	0.380759	0.594192	0.58745	0.600294	0.571566	0.607533
0.00211983	0.00193163	0.00301062	0.0292304	0.0322136	0.0325148	0.0413847	0.0556988	0.0565298	0.0499088	0.0450944	0.0511128	0.0519967	0.0569863	0.0606092	0.0918519	0.0992362	0.0872945	0.0872292	41.7718	34.5606	34.0935	29.8805	22.6222	16.3858	12.5108	9.69728	7.78041	6.51841	5.45633	3.64487	3.7073	3.73989	3.89218	3.57677	0.325683	0.353148	0.381176	0.404272	0.376644	0.380408	0.398651	0.369649	0.410985	0.37983	0.583705	0.578941	0.593302	0.563607	0.601964
0.0011673	0.00187593	0.00183563	0.0281904	0.0320185	0.0320405	0.038332	0.049765	0.0531429	0.0455773	0.0426136	0.0453897	0.0463451	0.0502709	0.0543973	0.101723	0.108214	0.0954168	0.0960379	36.5196	30.2959	29.8805	26.1679	19.8284	14.3185	10.9254	8.47825	6.81108	5.72108	4.7637	3.17152	3.25384	3.26442	3.39421	3.12237	0.282523	0.310892	0.331431	0.356906	0.334647	0.336722	0.3504	0.323633	0.356536	0.330197	0.511395	0.510405	0.516096	0.487112	0.526805
0.00140248	0.0013691	0.000868768	0.0180167	0.0193022	0.0223694	0.0258016	0.0446084	0.0470268	0.0413541	0.0369912	0.0423368	0.0415582	0.0466578	0.0505564	0.110878	0.119983	0.106279	0.104184	27.7181	22.938	22.6222	19.8284	15.0247	10.8464	8.28947	6.44176	5.15478	4.34141	3.61979	2.4216	2.44793	2.47959	2.58257	2.36123	0.216971	0.235185	0.248997	0.2743	0.253828	0.259055	0.268918	0.247822	0.272409	0.249388	0.382097	0.381808	0.389736	0.371924	0.403086
0.00271166	0.00207813	0.00282805	0.0320589	0.0397626	0.0413223	0.0494424	0.0636803	0.0683741	0.060878	0.0527702	0.0596765	0.0601046	0.0678205	0.0707243	0.136405	0.14242	0.129417	0.126535	20.009	16.5878	16.3858	14.3185	10.8464	7.85666	5.99601	4.65093	3.7208	3.13737	2.60842	1.74141	1.77998	1.79313	1.87074	1.70194	0.160684	0.169669	0.182745	0.19855	0.186318	0.187812	0.192748	0.177916	0.200262	0.181496	0.280109	0.282126	0.289124	0.269181	0.290263
0.012268	0.0129147	0.0119505	0.198706	0.203694	0.221643	0.270445	0.228385	0.235374	0.21171	0.186754	0.209327	0.216896	0.238201	0.249745	0.488193	0.52553	0.465806	0.460252	15.3023	12.6483	12.5108	10.9254	8.28947	5.99601	4.59305	3.56269	2.85973	2.40092	2.00105	1.34289	1.37526	1.37978	1.44441	1.31609	0.132904	0.141209	0.149051	0.159446	0.150258	0.152212	0.157941	0.146937	0.163542	0.146401	0.226264	0.226299	0.233335	0.216522	0.234019
0.0129203	0.0120888	0.0124278	0.190189	0.208952	0.238594	0.277805	0.286274	0.299964	0.265457	0.238504	0.263759	0.270108	0.294066	0.317718	0.48624	0.520868	0.460419	0.459456	11.8613	9.84297	9.69728	8.47825	6.44176	4.65093	3.56269	2.77779	2.22677	1.87487	1.55438	1.04413	1.06866	1.06805	1.12416	1.02656	0.100664	0.112424	0.120864	0.129111	0.118214	0.120291	0.125423	0.115503	0.130449	0.117791	0.181319	0.18048	0.182855	0.17548	0.183487
0.0139958	0.0123715	0.0147838	0.198053	0.212915	0.240932	0.276094	0.295451	0.31054	0.272517	0.245536	0.272385	0.276346	0.305602	0.329212	0.520618	0.556746	0.490988	0.488001	9.53196	7.88523	7.78041	6.81108	5.15478	3.7208	2.85973	2.22677	1.78337	1.4901	1.24709	0.835306	0.857182	0.865178	0.899374	0.830691	0.0847304	0.0920614	0.100074	0.108282	0.0974191	0.101147	0.105374	0.0978342	0.107897	0.0970237	0.150164	0.148373	0.152855	0.143349	0.154305
0.0164462	0.0165935	0.0154952	0.249317	0.264765	0.301161	0.338169	0.302656	0.311979	0.282773	0.251111	0.283471	0.278111	0.309546	0.327527	0.597294	0.639695	0.566244	0.561779	8.01089	6.62364	6.51841	5.72108	4.34141	3.13737	2.40092	1.87487	1.4901	1.27031	1.04922	0.706045	0.730667	0.724893	0.759114	0.695062	0.0763629	0.0780389	0.0865444	0.0959598	0.0866619	0.0880929	0.0907835	0.0852888	0.0955887	0.0863782	0.128456	0.129286	0.12842	0.124868	0.129714
0.0157486	0.0150564	0.0160081	0.220556	0.242652	0.268675	0.315846	0.278816	0.290183	0.259678	0.228612	0.257562	0.259842	0.285793	0.304539	0.561152	0.604667	0.534145	0.530269	6.68625	5.52501	5.45633	4.7637	3.61979	2.60842	2.00105	1.55438	1.24709	1.04922	0.862415	0.588551	0.601592	0.608626	0.632848	0.58178	0.0639709	0.0685851	0.0761613	0.0769409	0.0729187	0.0744121	0.0782707	0.0728439	0.0815414	0.0724701	0.106015	0.109828	0.111024	0.106628	0.11229
0.0200177	0.0209678	0.0205949	0.319018	0.343443	0.380043	0.448544	0.667437	0.697215	0.612871	0.552579	0.616362	0.622909	0.689072	0.742048	1.0958	1.17089	1.03835	1.03771	4.44147	3.69538	3.64487	3.17152	2.4216	1.74141	1.34289	1.04413	0.835306	0.706045	0.588551	0.409034	0.410735	0.414846	0.436029	0.399386	0.0601021	0.0630015	0.0672321	0.0708271	0.065766	0.0704416	0.0701589	0.0649807	0.0753663	0.0696894	0.0969859	0.0970322	0.0975126	0.0940493	0.094424
0.0257455	0.0233414	0.0252611	0.360278	0.391467	0.427485	0.506845	0.615658	0.640333	0.570623	0.502254	0.558561	0.569124	0.623528	0.671381	1.15754	1.23828	1.09309	1.09096	4.54085	3.77316	3.7073	3.25384	2.44793	1.77998	1.37526	1.06866	0.857182	0.730667	0.601592	0.410735	0.421444	0.423357	0.441732	0.406356	0.0615865	0.0623467	0.0688598	0.0723128	0.0666555	0.0708078	0.0697259	0.0683987	0.0772213	0.0719215	0.100528	0.0965263	0.0973626	0.093704	0.0937312
0.0261133	0.024912	0.0247924	0.353612	0.381282	0.424494	0.497653	0.626352	0.646394	0.577994	0.519355	0.57599	0.58371	0.644752	0.688005	1.07289	1.14461	1.01786	1.0118	4.57843	3.78917	3.73989	3.26442	2.47959	1.79313	1.37978	1.06805	0.865178	0.724893	0.608626	0.414846	0.423357	0.424384	0.446509	0.410889	0.0591275	0.062395	0.0682551	0.070779	0.0652898	0.0706294	0.0730997	0.0682175	0.0734139	0.0675254	0.0958621	0.095687	0.0970544	0.0953093	0.0972807
0.0266745	0.0252821	0.0242489	0.368714	0.395367	0.449278	0.513453	0.616474	0.639249	0.566095	0.510653	0.561539	0.570637	0.631724	0.674741	1.08696	1.16508	1.03539	1.02403	4.76746	3.9428	3.89218	3.39421	2.58257	1.87074	1.44441	1.12416	0.899374	0.759114	0.632848	0.436029	0.441732	0.446509	0.465994	0.427312	0.0602212	0.0657795	0.0690572	0.0740334	0.0681333	0.0728346	0.0755958	0.0692485	0.0790222	0.0696834	0.0991289	0.0979493	0.10122	0.0980312	0.100897
0.0240562	0.0245794	0.0247531	0.364373	0.392745	0.429089	0.506888	0.605879	0.633167	0.561036	0.500971	0.558804	0.568001	0.618373	0.671581	1.04946	1.12472	0.999543	0.994171	4.37673	3.61076	3.57677	3.12237	2.36123	1.70194	1.31609	1.02656	0.830691	0.695062	0.58178	0.399386	0.406356	0.410889	0.427312	0.391654	0.0572748	0.0622893	0.0662343	0.0700678	0.062196	0.066762	0.0690504	0.0661982	0.0718535	0.0665562	0.0921255	0.0953207	0.0968575	0.0914871	0.0956487
0.0264653	0.0263953	0.0264248	0.408688	0.447554	0.49683	0.581718	1.00659	1.03099	0.928809	0.827066	0.90979	0.925237	1.01859	1.08832	1.24541	1.33051	1.17913	1.17356	0.394374	0.332888	0.325683	0.282523	0.216971	0.160684	0.132904	0.100664	0.0847304	0.0763629	0.0639709	0.0601021	0.0615865	0.0591275	0.0602212	0.0572748	0.0368882	0.0366784	0.0403001	0.0398088	0.0362256	0.0427107	0.0419734	0.0411816	0.0439556	0.0421483	0.0482692	0.0501479	0.0496375	0.0478404	0.0505656
0.0318843	0.0313111	0.0312833	0.491763	0.521826	0.580383	0.676791	1.0489	1.09255	0.969671	0.87005	0.966403	0.980407	1.0757	1.15383	1.2608	1.35897	1.20105	1.19379	0.424499	0.356674	0.353148	0.310892	0.235185	0.169669	0.141209	0.112424	0.0920614	0.0780389	0.0685851	0.0630015	0.0623467	0.062395	0.0657795	0.0622893	0.0366784	0.0397891	0.0405999	0.0410864	0.0383723	0.0453933	0.0432937	0.0444114	0.0444108	0.0446622	0.052248	0.0517621	0.0532765	0.0506697	0.0531402
0.032913	0.0351767	0.0318208	0.5112	0.54494	0.608023	0.714571	1.06336	1.10692	0.972512	0.879297	0.973024	0.985941	1.0906	1.16575	1.43501	1.53591	1.36699	1.34957	0.465436	0.386128	0.381176	0.331431	0.248997	0.182745	0.149051	0.120864	0.100074	0.0865444	0.0761613	0.0672321	0.0688598	0.0682551	0.0690572	0.0662343	0.0403001	0.0405999	0.0442801	0.044524	0.0422229	0.0465887	0.0454908	0.0475013	0.0486402	0.0465376	0.0548578	0.0551457	0.0568919	0.05622	0.0550998
0.0373061	0.0369664	0.0339177	0.535254	0.564526	0.62959	0.732289	1.06605	1.10412	0.987218	0.877689	0.980276	1.00524	1.09162	1.17426	1.38151	1.48092	1.30915	1.29608	0.501018	0.411112	0.404272	0.356906	0.2743	0.19855	0.159446	0.129111	0.108282	0.0959598	0.0769409	0.0708271	0.0723128	0.070779	0.0740334	0.0700678	0.0398088	0.0410864	0.044524	0.0468703	0.0419531	0.048587	0.0466382	0.0475592	0.0497911	0.0471974	0.0576651	0.0580238	0.0558766	0.053284	0.0554796
0.03158	0.0302547	0.0277133	0.452284	0.498022	0.540864	0.641368	1.04823	1.08176	0.96921	0.863091	0.959296	0.968835	1.06958	1.14587	1.23182	1.31412	1.16787	1.15711	0.463512	0.390358	0.376644	0.334647	0.253828	0.186318	0.150258	0.118214	0.0974191	0.0866619	0.0729187	0.065766	0.0666555	0.0652898	0.0681333	0.062196	0.0362256	0.0383723	0.0422229	0.0419531	0.0397655	0.0442835	0.0425471	0.0431817	0.0459993	0.0441494	0.0508101	0.0506806	0.0523121	0.052071	0.0510847
0.0433649	0.0445043	0.0378223	0.634643	0.681848	0.739925	0.875722	1.203	1.23042	1.09854	0.983407	1.09022	1.10857	1.21432	1.29545	1.35518	1.45325	1.28527	1.2771	0.47236	0.390848	0.380408	0.336722	0.259055	0.187812	0.152212	0.120291	0.101147	0.0880929	0.0744121	0.0704416	0.0708078	0.0706294	0.0728346	0.066762	0.0427107	0.0453933	0.0465887	0.048587	0.0442835	0.0526743	0.0485823	0.0496328	0.0522439	0.049697	0.0594434	0.0605783	0.0609237	0.0587542	0.0586998
0.0411912	0.0403929	0.039467	0.629042	0.680598	0.750916	0.870004	1.13236	1.16526	1.03741	0.933629	1.03146	1.04803	1.14998	1.23504	1.31334	1.40836	1.25049	1.24276	0.487931	0.406163	0.398651	0.3504	0.268918	0.192748	0.157941	0.125423	0.105374	0.0907835	0.0782707	0.0701589	0.0697259	0.0730997	0.0755958	0.0690504	0.0419734	0.0432937	0.0454908	0.0466382	0.0425471	0.0485823	0.0444862	0.046649	0.0505565	0.0490484	0.0573643	0.0568501	0.0575225	0.0568763	0.0580706
0.0474822	0.0468544	0.0436301	0.65908	0.714743	0.793445	0.911846	1.13548	1.17075	1.04289	0.926988	1.03875	1.05278	1.1592	1.23743	1.3208	1.41494	1.25643	1.25155	0.44336	0.370586	0.369649	0.323633	0.247822	0.177916	0.146937	0.115503	0.0978342	0.0852888	0.0728439	0.0649807	0.0683987	0.0682175	0.0692485	0.0661982	0.0411816	0.0444114	0.0475013	0.0475592	0.0431817	0.0496328	0.046649	0.0457405	0.0508911	0.0484863	0.0617103	0.0567037	0.0583037	0.0574263	0.0584305
0.0481322	0.050312	0.046986	0.70638	0.759218	0.822163	0.968615	1.19854	1.2422	1.11002	0.974032	1.08343	1.10302	1.2083	1.29425	1.4472	1.54243	1.36742	1.35617	0.505541	0.414429	0.410985	0.356536	0.272409	0.200262	0.163542	0.130449	0.107897	0.0955887	0.0815414	0.0753663	0.0772213	0.0734139	0.0790222	0.0718535	0.0439556	0.0444108	0.0486402	0.0497911	0.0459993	0.0522439	0.0505565	0.0508911	0.0553049	0.052198	0.0624243	0.0615636	0.0633692	0.0629885	0.0613292
0.0413142	0.0435872	0.041939	0.643999	0.681206	0.763661	0.910672	1.18564	1.22738	1.09476	0.976654	1.08076	1.10249	1.20708	1.30369	1.35634	1.45365	1.29082	1.28072	0.456111	0.380759	0.37983	0.330197	0.249388	0.181496	0.146401	0.117791	0.0970237	0.0863782	0.0724701	0.0696894	0.0719215	0.0675254	0.0696834	0.0665562	0.0421483	0.0446622	0.0465376	0.0471974	0.0441494	0.049697	0.0490484	0.0484863	0.052198	0.0489133	0.0599875	0.0614508	0.0596586	0.059703	0.0577542
0.0651713	0.0600791	0.0648274	0.977888	1.05077	1.14683	1.34161	1.18355	1.22327	1.08612	0.967476	1.0714	1.09857	1.19456	1.28863	1.6797	1.79683	1.59431	1.58028	0.7105	0.594192	0.583705	0.511395	0.382097	0.280109	0.226264	0.181319	0.150164	0.128456	0.106015	0.0969859	0.100528	0.0958621	0.0991289	0.0921255	0.0482692	0.052248	0.0548578	0.0576651	0.0508101	0.0594434	0.0573643	0.0617103	0.0624243	0.0599875	0.0754526	0.0733158	0.0724192	0.0702894	0.0723857
0.0614187	0.0627858	0.0640916	0.939443	1.01103	1.10501	1.29936	1.23573	1.28007	1.14609	1.01457	1.12963	1.14982	1.26229	1.36128	1.64317	1.7564	1.5576	1.55167	0.701988	0.58745	0.578941	0.510405	0.381808	0.282126	0.226299	0.18048	0.148373	0.129286	0.109828	0.0970322	0.0965263	0.095687	0.0979493	0.0953207	0.0501479	0.0517621	0.0551457	0.0580238	0.0506806	0.0605783	0.0568501	0.0567037	0.0615636	0.0614508	0.0733158	0.0752452	0.0716294	0.0708599	0.0688763
0.059047	0.0630462	0.0655601	0.945798	1.00352	1.12222	1.30155	1.18465	1.22802	1.09814	0.969249	1.08261	1.09302	1.20916	1.29261	1.70231	1.82605	1.62027	1.60776	0.720011	0.600294	0.593302	0.516096	0.389736	0.289124	0.233335	0.182855	0.152855	0.12842	0.111024	0.0975126	0.0973626	0.0970544	0.10122	0.0968575	0.0496375	0.0532765	0.0568919	0.0558766	0.0523121	0.0609237	0.0575225	0.0583037	0.0633692	0.0596586	0.0724192	0.0716294	0.0735306	0.0729685	0.0715403
0.0635559	0.0628737	0.0633767	0.929825	0.994786	1.12974	1.2972	1.20807	1.24958	1.11732	0.99204	1.11106	1.12665	1.23238	1.32715	1.59958	1.72133	1.52544	1.50852	0.681965	0.571566	0.563607	0.487112	0.371924	0.269181	0.216522	0.17548	0.143349	0.124868	0.106628	0.0940493	0.093704	0.0953093	0.0980312	0.0914871	0.0478404	0.0506697	0.05622	0.053284	0.052071	0.0587542	0.0568763	0.0574263	0.0629885	0.059703	0.0702894	0.0708599	0.0729685	0.0681309	0.0702959
0.062002	0.0583741	0.0554848	0.894068	0.959471	1.06992	1.22664	1.23057	1.27571	1.12941	1.01039	1.12515	1.14203	1.2514	1.34798	1.57824	1.69166	1.50372	1.49413	0.735848	0.607533	0.601964	0.526805	0.403086	0.290263	0.234019	0.183487	0.154305	0.129714	0.11229	0.094424	0.0937312	0.0972807	0.100897	0.0956487	0.0505656	0.0531402	0.0550998	0.0554796	0.0510847	0.0586998	0.0580706	0.0584305	0.0613292	0.0577542	0.0723857	0.0688763	0.0715403	0.0702959	0.0707343
0.0872066	0.0876065	0.0836759	1.29857	1.38706	1.54636	1.78557	1.10805	1.13297	1.0204	0.900849	0.99883	1.01516	1.11148	1.19325	1.72018	1.84095	1.63037	1.61626	0.756625	0.622314	0.618972	0.539442	0.411054	0.299259	0.24472	0.193723	0.156548	0.13866	0.114989	0.101356	0.10179	0.102759	0.105568	0.0986465	0.0518673	0.0555462	0.0553162	0.0579438	0.0547512	0.0615773	0.0601179	0.0620664	0.0652915	0.0615577	0.0784015	0.0766871	0.0776281	0.0763858	0.0767979
0.0942238	0.0965317	0.0920501	1.38481	1.50827	1.67272	1.94137	1.13142	1.15615	1.032	0.926207	1.02067	1.05009	1.15	1.22818	1.83429	1.96311	1.74547	1.72413	0.763474	0.627047	0.622189	0.5472	0.411953	0.29884	0.236532	0.192832	0.159209	0.139719	0.116268	0.101997	0.105301	0.104137	0.105741	0.101902	0.0533981	0.0585785	0.0604076	0.0607011	0.0565734	0.0675371	0.063112	0.0653299	0.0697965	0.0674341	0.0810256	0.0803617	0.0835585	0.0792094	0.0792567
0.0926655	0.0888304	0.0943359	1.42419	1.50122	1.67452	1.94985	1.12968	1.16767	1.04421	0.939426	1.03712	1.05271	1.16179	1.24115	1.80388	1.92912	1.71453	1.70206	0.755694	0.627045	0.624589	0.533337	0.410111	0.298957	0.242353	0.195133	0.159372	0.138823	0.117602	0.10252	0.105108	0.100187	0.107224	0.0992287	0.0547795	0.0550856	0.0613062	0.0629308	0.0565725	0.0645252	0.062413	0.0637476	0.0685106	0.0657117	0.0803558	0.0813459	0.0835291	0.0834808	0.078271
0.0787568	0.0817778	0.0792061	1.21992	1.31954	1.45176	1.71836	1.10216	1.14348	1.01968	0.901133	0.991654	1.0054	1.10621	1.19581	1.63785	1.74645	1.55825	1.53943	0.70872	0.579645	0.58087	0.501562	0.379683	0.277435	0.226856	0.176405	0.148315	0.128836	0.106447	0.0928978	0.0966678	0.0939094	0.0970984	0.0932755	0.0521147	0.0535914	0.0563053	0.0574746	0.0515292	0.0602536	0.0593662	0.0595731	0.0626946	0.0613127	0.0760987	0.075596	0.0750019	0.072466	0.0736453
0.0851806	0.0843088	0.0815529	1.22572	1.34051	1.48129	1.70789	1.0246	1.0581	0.937218	0.836649	0.931079	0.946858	1.0387	1.11931	1.57874	1.69194	1.50211	1.48852	0.705071	0.591977	0.588426	0.507429	0.385076	0.284591	0.224294	0.180992	0.148059	0.128211	0.108291	0.0956084	0.0961359	0.0963887	0.101088	0.0915309	0.0456305	0.0510543	0.052555	0.0550231	0.0493928	0.0575637	0.0576101	0.0559151	0.0601947	0.0594322	0.0732073	0.0726814	0.0727138	0.07038	0.0696576
0.0713164	0.0709202	0.0718064	1.07082	1.14971	1.27499	1.47842	0.891074	0.919617	0.817135	0.728096	0.812949	0.829636	0.908637	0.97299	1.69949	1.81873	1.61114	1.61048	1.0157	0.84501	0.834508	0.728367	0.561301	0.402958	0.322783	0.252249	0.206957	0.179697	0.147768	0.121338	0.124847	0.121045	0.124182	0.118112	0.0477362	0.0505434	0.0515646	0.0542056	0.0495243	0.0563485	0.0560764	0.0569335	0.0605149	0.0562046	0.073393	0.0724147	0.0721516	0.0723823	0.0710029
0.0579952	0.0573791	0.0535325	0.829643	0.898978	0.997061	1.15802	0.806859	0.842023	0.745743	0.671547	0.744514	0.758129	0.835142	0.895095	1.45587	1.55217	1.37828	1.36644	0.948015	0.773966	0.768896	0.674492	0.513966	0.374474	0.292378	0.229736	0.188688	0.157967	0.137459	0.107576	0.108805	0.108135	0.109973	0.10097	0.0408732	0.0437185	0.0472272	0.0477338	0.0436974	0.0507418	0.0527637	0.0491064	0.0527938	0.0513135	0.061292	0.0649937	0.0622057	0.0597617	0.0610128
0.04375	0.0456086	0.0459762	0.661238	0.721576	0.79869	0.920173	0.585508	0.600211	0.532202	0.467245	0.523696	0.531156	0.584524	0.623971	1.17399	1.26299	1.11866	1.11228	0.705153	0.588169	0.578184	0.515543	0.390772	0.282703	0.219405	0.176294	0.142356	0.123043	0.10386	0.0803533	0.0844197	0.0838283	0.0877548	0.0795462	0.0318123	0.0343066	0.0376663	0.0358302	0.0349733	0.0397865	0.039406	0.0376982	0.0390975	0.0376126	0.0494791	0.049514	0.048156	0.0468722	0.0488978
0.0329385	0.0360971	0.0343029	0.520665	0.562391	0.615706	0.717205	0.481751	0.494129	0.447062	0.391397	0.436271	0.442598	0.485165	0.524756	0.893707	0.9617	0.850485	0.840412	0.53693	0.450078	0.441086	0.381682	0.295055	0.209846	0.168902	0.132476	0.107592	0.092705	0.0779203	0.0630517	0.0632374	0.0644752	0.0652077	0.0619481	0.0258636	0.0264023	0.0287922	0.0294831	0.0275084	0.0303861	0.0295341	0.0312746	0.032353	0.0294546	0.0377736	0.037391	0.0387319	0.0356606	0.0376926
0.0239819	0.0269747	0.0243818	0.375666	0.409691	0.458929	0.524086	0.409667	0.422556	0.386412	0.332658	0.370765	0.369816	0.41041	0.441988	0.678484	0.724077	0.64409	0.642439	0.40783	0.335499	0.335673	0.293517	0.218546	0.161143	0.126335	0.100266	0.0842223	0.0706255	0.0580319	0.0480584	0.0485875	0.047997	0.0504776	0.0476178	0.0197214	0.0206054	0.0221806	0.0219849	0.0220261	0.0232437	0.0225092	0.0231189	0.0249717	0.0242542	0.0300227	0.0295899	0.029419	0.0282938	0.0293286
0.00566638	0.00396876	0.0051883	0.0756239	0.0803114	0.0905789	0.107731	0.208979	0.216355	0.192222	0.169934	0.190584	0.192811	0.213032	0.229109	0.598505	0.639463	0.569464	0.560984	1.10305	0.901945	0.896511	0.78139	0.593201	0.424075	0.331197	0.25849	0.208437	0.178293	0.145276	0.100869	0.104784	0.108028	0.110052	0.100559	0.0182323	0.0191622	0.0211751	0.0232595	0.019237	0.0214059	0.021787	0.0210039	0.0223831	0.0214948	0.0295726	0.0284074	0.0296238	0.0284017	0.0284735
0.00441591	0.0053007	0.00442394	0.0678001	0.0713688	0.0789747	0.0959751	0.170309	0.176117	0.152013	0.139464	0.157383	0.156574	0.174194	0.186709	0.493787	0.532502	0.470095	0.465198	0.924641	0.760203	0.748995	0.655887	0.495773	0.364045	0.277323	0.218591	0.171124	0.148548	0.124024	0.0852753	0.0887599	0.0882499	0.0910124	0.0835919	0.0152155	0.0157044	0.0175976	0.018272	0.0179023	0.0186686	0.0167212	0.0167955	0.020609	0.0176803	0.0236944	0.0232436	0.0251061	0.0230985	0.0243649
0.000756894	0.0013358	0.00095219	0.0172362	0.0200666	0.0184848	0.0231649	0.0635709	0.0651952	0.0579274	0.0532986	0.059109	0.0601068	0.0643124	0.0700465	0.209311	0.220667	0.196466	0.191752	0.39345	0.321661	0.319612	0.284333	0.212779	0.154032	0.1185	0.0928165	0.0737912	0.0634145	0.053086	0.0356049	0.0390775	0.0376491	0.0384314	0.0346063	0.00656349	0.00607438	0.00669461	0.00761967	0.0071209	0.00762971	0.00718708	0.00778721	0.00828514	0.00772496	0.00955364	0.0106275	0.00921169	0.0094537	0.0097
0.000706044	0.00076385	0.000901791	0.0104546	0.0109054	0.0138026	0.0163489	0.0594168	0.0620875	0.0556619	0.0475427	0.0529925	0.0557329	0.0588958	0.0645331	0.140485	0.148218	0.133888	0.129232	0.257771	0.209612	0.212135	0.187229	0.140892	0.100718	0.077276	0.060898	0.0480185	0.0405502	0.0346979	0.0241943	0.0249448	0.0247393	0.0265621	0.0238288	0.00433873	0.00520167	0.00542969	0.00515553	0.00502899	0.00508586	0.00527129	0.0052798	0.00587732	0.00527633	0.0068714	0.00662719	0.00713561	0.0068912	0.00708028
0.00137687	0.00129124	0.0014949	0.0204501	0.0225315	0.0199996	0.0270098	0.0462457	0.0470414	0.0434119	0.036971	0.0404745	0.0410165	0.047105	0.0482119	0.147058	0.157273	0.138987	0.137566	0.257917	0.211981	0.211623	0.184047	0.143845	0.0999173	0.0795332	0.0610957	0.050345	0.0415689	0.0338131	0.0240347	0.0245845	0.0248062	0.0263868	0.0232282	0.00449327	0.00485833	0.00468029	0.00528525	0.00450218	0.00466743	0.00450596	0.00525926	0.00575818	0.00548649	0.00679654	0.00715262	0.00721947	0.0063375	0.00708517
0	0	0	0	0	0	0	0.0374709	0.039482	0.0337745	0.0305747	0.0342298	0.0338883	0.0373115	0.0395623	0.0741644	0.0777062	0.0696353	0.0687854	0.862454	0.710642	0.704623	0.616269	0.46792	0.333046	0.257288	0.200549	0.161019	0.135866	0.115319	0.0737846	0.0757238	0.0794881	0.0812614	0.074036	0.0081374	0.00859492	0.00850288	0.00918925	0.0088002	0.00965855	0.00932186	0.00845841	0.0100472	0.0083104	0.0140168	0.0132778	0.0138774	0.012915	0.0137144
0	0	0	0	0	0	0	0.0250193	0.025732	0.0233448	0.0214237	0.0239201	0.0232108	0.0258266	0.0275271	0.0489072	0.0530565	0.0474444	0.0472853	0.572687	0.47319	0.462933	0.406618	0.309239	0.222179	0.170394	0.131501	0.105516	0.0897773	0.0724498	0.0506485	0.0514841	0.0526656	0.053465	0.0482921	0.00596469	0.00539635	0.00572049	0.00703046	0.0062988	0.00640794	0.00616636	0.00586404	0.00649199	0.00592825	0.00912577	0.00913261	0.00897697	0.0089981	0.00944005
0	0	0	0	0	0	0	0.0159074	0.0160422	0.0128961	0.0125705	0.0144347	0.0143734	0.0160132	0.0167858	0.0466416	0.0499726	0.0448064	0.0440283	0.362262	0.295981	0.291297	0.252122	0.194659	0.139279	0.106449	0.0838588	0.0674664	0.0556082	0.0478416	0.0314373	0.032368	0.032266	0.0344806	0.0320625	0.00345593	0.00373194	0.00416141	0.004355	0.0042195	0.00393527	0.00421999	0.00439899	0.00440599	0.00402517	0.00603127	0.00625161	0.00614073	0.00573812	0.00583044
0	0	0	0	0	0	0	0.0112403	0.0115196	0.0114572	0.00987522	0.011083	0.0104441	0.0112557	0.0122586	0.0236851	0.0249339	0.0218727	0.0223101	0.243121	0.202929	0.197955	0.176015	0.130118	0.0971458	0.0727737	0.0563649	0.0451626	0.0381671	0.0310457	0.0218105	0.0227115	0.0228615	0.0242668	0.0211328	0.00268836	0.00259182	0.00235432	0.0029801	0.0027115	0.00301966	0.00315201	0.00296911	0.00283081	0.00285389	0.00395071	0.00434459	0.00426791	0.00292721	0.00385864
0	0	0	0	0	0	0	0.015083	0.0157814	0.0132783	0.0124261	0.0147857	0.0148082	0.0163696	0.0166103	0.0194753	0.0202574	0.0178981	0.0179731	0.199868	0.166278	0.163275	0.143008	0.109825	0.0791809	0.0602759	0.0468207	0.037594	0.0311238	0.0270346	0.0172279	0.0183835	0.0186037	0.0178978	0.018086	0.0023014	0.00183965	0.00239406	0.00257915	0.00232998	0.00243947	0.0026528	0.00229889	0.00226326	0.00233352	0.00332041	0.00343719	0.0034781	0.00314938	0.00370519
0	0	0	0	0	0	0	0	0	0	0	0	0	0	0	0	0	0	0	0	0	0	0	0	0	0	0	0	0	0	0	0	0	0	0	0	0	0	0	0	0	0	0	0	0	0	0	0	0	0
0	0	0	0	0	0	0	0	0	0	0	0	0	0	0	0	0	0	0	0	0	0	0	0	0	0	0	0	0	0	0	0	0	0	0	0	0	0	0	0	0	0	0	0	0	0	0	0	0	0
0	0	0	0	0	0	0	0	0	0	0	0	0	0	0	0	0	0	0	0	0	0	0	0	0	0	0	0	0	0	0	0	0	0	0	0	0	0	0	0	0	0	0	0	0	0	0	0	0	0
0	0	0	0	0	0	0	0	0	0	0	0	0	0	0	0	0	0	0	0	0	0	0	0	0	0	0	0	0	0	0	0	0	0	0	0	0	0	0	0	0	0	0	0	0	0	0	0	0	0
0	0	0	0	0	0	0	0	0	0	0	0	0	0	0	0	0	0	0	0	0	0	0	0	0	0	0	0	0	0	0	0	0	0	0	0	0	0	0	0	0	0	0	0	0	0	0	0	0	0
0	0	0	0	0	0	0	0	0	0	0	0	0	0	0	0	0	0	0	0	0	0	0	0	0	0	0	0	0	0	0	0	0	0	0	0	0	0	0	0	0	0	0	0	0	0	0	0	0	0
0	0	0	0	0	0	0	0	0	0	0	0	0	0	0	0	0	0	0	0	0	0	0	0	0	0	0	0	0	0	0	0	0	0	0	0	0	0	0	0	0	0	0	0	0	0	0	0	0	0
0	0	0	0	0	0	0	0	0	0	0	0	0	0	0	0	0	0	0	0	0	0	0	0	0	0	0	0	0	0	0	0	0	0	0	0	0	0	0	0	0	0	0	0	0	0	0	0	0	0
0	0	0	0	0	0	0	0	0	0	0	0	0	0	0	0	0	0	0	0	0	0	0	0	0	0	0	0	0	0	0	0	0	0	0	0	0	0	0	0	0	0	0	0	0	0	0	0	0	0
0	0	0	0	0	0	0	0	0	0	0	0	0	0	0	0	0	0	0	0	0	0	0	0	0	0	0	0	0	0	0	0	0	0	0	0	0	0	0	0	0	0	0	0	0	0	0	0	0	0
0	0	0	0	0	0	0	0	0	0	0	0	0	0	0	0	0	0	0	0	0	0	0	0	0	0	0	0	0	0	0	0	0	0	0	0	0	0	0	0	0	0	0	0	0	0	0	0	0	0
0	0	0	0	0	0	0	0	0	0	0	0	0	0	0	0	0	0	0	0	0	0	0	0	0	0	0	0	0	0	0	0	0	0	0	0	0	0	0	0	0	0	0	0	0	0	0	0	0	0
0	0	0	0	0	0	0	0	0	0	0	0	0	0	0	0	0	0	0	0	0	0	0	0	0	0	0	0	0	0	0	0	0	0	0	0	0	0	0	0	0	0	0	0	0	0	0	0	0	0
0	0	0	0	0	0	0	0	0	0	0	0	0	0	0	0	0	0	0	0	0	0	0	0	0	0	0	0	0	0	0	0	0	0	0	0	0	0	0	0	0	0	0	0	0	0	0	0	0	0
0	0	0	0	0	0	0	0	0	0	0	0	0	0	0	0	0	0	0	0	0	0	0	0	0	0	0	0	0	0	0	0	0	0	0	0	0	0	0	0	0	0	0	0	0	0	0	0	0	0
0	0	0	0	0	0	0	0	0	0	0	0	0	0	0	0	0	0	0	0	0	0	0	0	0	0	0	0	0	0	0	0	0	0	0	0	0	0	0	0	0	0	0	0	0	0	0	0	0	0
0	0	0	0	0	0	0	0	0	0	0	0	0	0	0	0	0	0	0	0	0	0	0	0	0	0	0	0	0	0	0	0	0	0	0	0	0	0	0	0	0	0	0	0	0	0	0	0	0	0
0	0	0	0	0	0	0	0	0	0	0	0	0	0	0	0	0	0	0	0	0	0	0	0	0	0	0	0	0	0	0	0	0	0	0	0	0	0	0	0	0	0	0	0	0	0	0	0	0	0
0	0	0	0	0	0	0	0	0	0	0	0	0	0	0	0	0	0	0	0	0	0	0	0	0	0	0	0	0	0	0	0	0	0	0	0	0	0	0	0	0	0	0	0	0	0	0	0	0	0
0	0	0	0	0	0	0	0	0	0	0	0	0	0	0	0	0	0	0	0	0	0	0	0	0	0	0	0	0	0	0	0	0	0	0	0	0	0	0	0	0	0	0	0	0	0	0	0	0	0
0	0	0	0	0	0	0	0	0	0	0	0	0	0	0	0	0	0	0	0	0	0	0	0	0	0	0	0	0	0	0	0	0	0	0	0	0	0	0	0	0	0	0	0	0	0	0	0	0	0
0	0	0	0	0	0	0	0	0	0	0	0	0	0	0	0	0	0	0	0	0	0	0	0	0	0	0	0	0	0	0	0	0	0	0	0	0	0	0	0	0	0	0	0	0	0	0	0	0	0
0	0	0	0	0	0	0	0	0	0	0	0	0	0	0	0	0	0	0	0	0	0	0	0	0	0	0	0	0	0	0	0	0	0	0	0	0	0	0	0	0	0	0	0	0	0	0	0	0	0
0	0	0	0	0	0	0	0	0	0	0	0	0	0	0	0	0	0	0	0	0	0	0	0	0	0	0	0	0	0	0	0	0	0	0	0	0	0	0	0	0	0	0	0	0	0	0	0	0	0
0	0	0	0	0	0	0	0	0	0	0	0	0	0	0	0	0	0	0	0	0	0	0	0	0	0	0	0	0	0	0	0	0	0	0	0	0	0	0	0	0	0	0	0	0	0	0	0	0	0
0	0	0	0	0	0	0	0	0	0	0	0	0	0	0	0	0	0	0	0	0	0	0	0	0	0	0	0	0	0	0	0	0	0	0	0	0	0	0	0	0	0	0	0	0	0	0	0	0	0
0	0	0	0	0	0	0	0	0	0	0	0	0	0	0	0	0	0	0	0	0	0	0	0	0	0	0	0	0	0	0	0	0	0	0	0	0	0	0	0	0	0	0	0	0	0	0	0	0	0
0	0	0	0	0	0	0	0	0	0	0	0	0	0	0	0	0	0	0	0	0	0	0	0	0	0	0	0	0	0	0	0	0	0	0	0	0	0	0	0	0	0	0	0	0	0	0	0	0	0
0	0	0	0	0	0	0	0	0	0	0	0	0	0	0	0	0	0	0	0	0	0	0	0	0	0	0	0	0	0	0	0	0	0	0	0	0	0	0	0	0	0	0	0	0	0	0	0	0	0
0	0	0	0	0	0	0	0	0	0	0	0	0	0	0	0	0	0	0	0	0	0	0	0	0	0	0	0	0	0	0	0	0	0	0	0	0	0	0	0	0	0	0	0	0	0	0	0	0	0
Workplace
0	0	0	0	0	0	0	0	0	0	0	0	0	0	0	0	0	0	0	0	0	0	0	0	0	0	0	0	0	0	0	0	0	0	0	0	0	0	0	0	0	0	0	0	0	0	0	0	0	0
0	0	0	0	0	0	0	0	0	0	0	0	0	0	0	0	0	0	0	0	0	0	0	0	0	0	0	0	0	0	0	0	0	0	0	0	0	0	0	0	0	0	0	0	0	0	0	0	0	0
0	0	0	0	0	0	0	0	0	0	0	0	0	0	0	0	0	0	0	0	0	0	0	0	0	0	0	0	0	0	0	0	0	0	0	0	0	0	0	0	0	0	0	0	0	0	0	0	0	0
0	0	0	0	0	0	0	0	0	0	0	0	0	0	0	0	0	0	0	0	0	0	0	0	0	0	0	0	0	0	0	0	0	0	0	0	0	0	0	0	0	0	0	0	0	0	0	0	0	0
0	0	0	0	0	0	0	0	0	0	0	0	0	0	0	0	0	0	0	0	0	0	0	0	0	0	0	0	0	0	0	0	0	0	0	0	0	0	0	0	0	0	0	0	0	0	0	0	0	0
0	0	0	0	0	0	0	0	0	0	0	0	0	0	0	0	0	0	0	0	0	0	0	0	0	0	0	0	0	0	0	0	0	0	0	0	0	0	0	0	0	0	0	0	0	0	0	0	0	0
0	0	0	0	0	0	0	0	0	0	0	0	0	0	0	0	0	0	0	0	0	0	0	0	0	0	0	0	0	0	0	0	0	0	0	0	0	0	0	0	0	0	0	0	0	0	0	0	0	0
0	0	0	0	0	0	0	0	0	0	0	0	0	0	0	0	0	0	0	0	0	0	0	0	0	0	0	0	0	0	0	0	0	0	0	0	0	0	0	0	0	0	0	0	0	0	0	0	0	0
0	0	0	0	0	0	0	0	0	0	0	0	0	0	0	0	0	0	0	0	0	0	0	0	0	0	0	0	0	0	0	0	0	0	0	0	0	0	0	0	0	0	0	0	0	0	0	0	0	0
0	0	0	0	0	0	0	0	0	0	0	0	0	0	0	0	0	0	0	0	0	0	0	0	0	0	0	0	0	0	0	0	0	0	0	0	0	0	0	0	0	0	0	0	0	0	0	0	0	0
0	0	0	0	0	0	0	0	0	0	0	0	0	0	0	0	0	0	0	0	0	0	0	0	0	0	0	0	0	0	0	0	0	0	0	0	0	0	0	0	0	0	0	0	0	0	0	0	0	0
0	0	0	0	0	0	0	0	0	0	0	0	0	0	0	0	0	0	0	0	0	0	0	0	0	0	0	0	0	0	0	0	0	0	0	0	0	0	0	0	0	0	0	0	0	0	0	0	0	0
0	0	0	0	0	0	0	0	0	0	0	0	0	0	0	0	0	0	0	0	0	0	0	0	0	0	0	0	0	0	0	0	0	0	0	0	0	0	0	0	0	0	0	0	0	0	0	0	0	0
0	0	0	0	0	0	0	0	0	0	0	0	0	0	0	0	0	0	0	0	0	0	0	0	0	0	0	0	0	0	0	0	0	0	0	0	0	0	0	0	0	0	0	0	0	0	0	0	0	0
0	0	0	0	0	0	0	0	0	0	0	0	0	0	0	0	0	0	0	0	0	0	0	0	0	0	0	0	0	0	0	0	0	0	0	0	0	0	0	0	0	0	0	0	0	0	0	0	0	0
0	0	0	0	0	0	0	0	0	0	0	0	0	0	0	0	0	0	0	0	0	0	0	0	0	0	0	0	0	0	0	0	0	0	0	0	0	0	0	0	0	0	0	0	0	0	0	0	0	0
0	0	0	0	0	0	0	0	0	0	0	0	0	0	0	0	0	0	0	0	0	0	0	0	0	0	0	0	0	0	0	0	0	0	0	0	0	0	0	0	0	0	0	0	0	0	0	0	0	0
0	0	0	0	0	0	0	0	0	0	0	0	0	0	0	0	0	0.212941	0.286599	0.686091	0.681432	0.73318	0.763866	0.869121	0.950984	1.08465	1.11335	1.154	1.22782	1.24665	1.30829	1.35484	1.3323	1.38342	1.28332	1.2463	1.29832	1.36458	1.40097	1.34614	1.18206	1.17859	1.21611	1.22384	1.24824	1.22471	1.25914	1.23622	1.18734	1.18005
0	0	0	0	0	0	0	0	0	0	0	0	0	0	0	0	0	0.286599	0.380045	0.889898	0.905026	0.966095	0.991305	1.15659	1.25395	1.41735	1.46367	1.52735	1.64535	1.62825	1.75647	1.7864	1.80177	1.79768	1.70865	1.67406	1.74831	1.77225	1.8335	1.7763	1.58432	1.55815	1.58409	1.62527	1.63034	1.60629	1.67405	1.61872	1.60333	1.57356
0	0	0	0	0	0	0	0	0	0	0	0	0	0	0	0	0	0.686091	0.889898	2.03726	2.08581	2.22042	2.32249	2.66921	2.9152	3.25696	3.45149	3.52244	3.77344	3.76751	4.00026	4.1092	4.09979	4.16393	3.91295	3.83903	3.93994	4.05498	4.20595	4.12631	3.5885	3.50896	3.56633	3.74809	3.75844	3.72883	3.80782	3.75892	3.63417	3.61343
0	0	0	0	0	0	0	0	0	0	0	0	0	0	0	0	0	0.681432	0.905026	2.08581	2.1708	2.31497	2.41674	2.77855	3.03726	3.39266	3.55803	3.61338	3.89465	3.86664	4.16216	4.25449	4.2502	4.32104	4.05998	3.94644	4.12521	4.26208	4.39395	4.27459	3.77901	3.69479	3.77129	3.883	3.90687	3.89781	3.96112	3.9146	3.7887	3.75297
0	0	0	0	0	0	0	0	0	0	0	0	0	0	0	0	0	0.73318	0.966095	2.22042	2.31497	2.40843	2.56743	2.93003	3.21844	3.63619	3.77477	3.88719	4.14404	4.12836	4.42025	4.49902	4.49828	4.58939	4.32467	4.24084	4.37358	4.47654	4.6099	4.52184	4.00314	3.90842	3.97795	4.17573	4.14452	4.10494	4.20468	4.1409	4.01292	4.021
0	0	0	0	0	0	0	0	0	0	0	0	0	0	0	0	0	0.763866	0.991305	2.32249	2.41674	2.56743	2.65725	3.06032	3.32224	3.74529	3.89054	4.03414	4.32314	4.27984	4.61429	4.76331	4.73849	4.82403	4.50703	4.38508	4.53117	4.67191	4.8053	4.76473	4.12562	4.09944	4.16991	4.26276	4.31873	4.32309	4.36695	4.3306	4.16445	4.1541
0	0	0	0	0	0	0	0	0	0	0	0	0	0	0	0	0	0.869121	1.15659	2.66921	2.77855	2.93003	3.06032	3.50736	3.85683	4.32288	4.48702	4.59852	4.98479	4.97456	5.33592	5.37754	5.416	5.4853	5.13724	5.06192	5.23774	5.38708	5.53576	5.44614	4.78612	4.70807	4.80771	4.96132	4.97302	4.96895	5.03665	4.96703	4.81882	4.76796
0	0	0	0	0	0	0	0	0	0	0	0	0	0	0	0	0	0.950984	1.25395	2.9152	3.03726	3.21844	3.32224	3.85683	4.22801	4.74937	4.90697	5.08844	5.45937	5.44347	5.80636	5.8734	5.87951	6.00085	5.63224	5.55791	5.71636	5.90981	6.08004	5.96039	5.21047	5.11577	5.22424	5.43762	5.44394	5.39203	5.55045	5.41319	5.27758	5.2171
0	0	0	0	0	0	0	0	0	0	0	0	0	0	0	0	0	1.08465	1.41735	3.25696	3.39266	3.63619	3.74529	4.32288	4.74937	5.30236	5.51612	5.69387	6.08839	6.08975	6.52573	6.61995	6.66811	6.76131	6.33168	6.23411	6.43441	6.61319	6.82348	6.64207	5.85992	5.78101	5.85306	6.08293	6.12528	6.02135	6.11432	6.09996	5.90569	5.8444
0	0	0	0	0	0	0	0	0	0	0	0	0	0	0	0	0	1.11335	1.46367	3.45149	3.55803	3.77477	3.89054	4.48702	4.90697	5.51612	5.84308	5.9433	6.37459	6.40213	6.78134	6.934	6.94027	7.07159	6.63463	6.5143	6.6988	6.88318	7.14219	6.92914	6.14487	5.99109	6.10605	6.31936	6.34101	6.29662	6.40714	6.31523	6.16197	6.12195
0	0	0	0	0	0	0	0	0	0	0	0	0	0	0	0	0	1.154	1.52735	3.52244	3.61338	3.88719	4.03414	4.59852	5.08844	5.69387	5.9433	6.17334	6.54355	6.52562	7.03539	7.13508	7.15638	7.2847	6.84357	6.69418	6.88755	7.1193	7.32366	7.17654	6.28448	6.22619	6.29758	6.48787	6.52604	6.53783	6.70337	6.57121	6.29608	6.3418
0	0	0	0	0	0	0	0	0	0	0	0	0	0	0	0	0	1.22782	1.64535	3.77344	3.89465	4.14404	4.32314	4.98479	5.45937	6.08839	6.37459	6.54355	7.08082	7.02996	7.52747	7.64785	7.66767	7.8109	7.3632	7.16815	7.44393	7.64495	7.89013	7.68676	6.77523	6.59947	6.72961	7.02646	7.00659	6.94842	7.09682	7.07145	6.80724	6.74886
0	0	0	0	0	0	0	0	0	0	0	0	0	0	0	0	0	1.24665	1.62825	3.76751	3.86664	4.12836	4.27984	4.97456	5.44347	6.08975	6.40213	6.52562	7.02996	7.03012	7.51889	7.67576	7.66537	7.76483	7.33763	7.15292	7.38067	7.63252	7.89211	7.64541	6.73393	6.65291	6.70379	6.95727	7.02408	6.97272	7.07501	7.02742	6.77806	6.70884
0	0	0	0	0	0	0	0	0	0	0	0	0	0	0	0	0	1.30829	1.75647	4.00026	4.16216	4.42025	4.61429	5.33592	5.80636	6.52573	6.78134	7.03539	7.52747	7.51889	7.9837	8.14284	8.235	8.33263	7.82619	7.68529	7.91692	8.18611	8.42899	8.20113	7.24951	7.10304	7.19927	7.4961	7.49208	7.40285	7.60368	7.51326	7.26538	7.25212
0	0	0	0	0	0	0	0	0	0	0	0	0	0	0	0	0	1.35484	1.7864	4.1092	4.25449	4.49902	4.76331	5.37754	5.8734	6.61995	6.934	7.13508	7.64785	7.67576	8.14284	8.33581	8.36876	8.50672	7.94919	7.78027	8.10987	8.24927	8.57088	8.37688	7.35891	7.20761	7.35392	7.5679	7.58368	7.5891	7.73375	7.66575	7.33827	7.34642
0	0	0	0	0	0	0	0	0	0	0	0	0	0	0	0	0	1.3323	1.80177	4.09979	4.2502	4.49828	4.73849	5.416	5.87951	6.66811	6.94027	7.15638	7.66767	7.66537	8.235	8.36876	8.50781	8.53022	8.04449	7.84386	8.06102	8.32265	8.58925	8.41184	7.41265	7.28034	7.41	7.65757	7.67276	7.64148	7.74636	7.66737	7.37447	7.33185
0	0	0	0	0	0	0	0	0	0	0	0	0	0	0	0	0	1.38342	1.79768	4.16393	4.32104	4.58939	4.82403	5.4853	6.00085	6.76131	7.07159	7.2847	7.8109	7.76483	8.33263	8.50672	8.53022	8.68158	8.09199	7.95305	8.2042	8.42179	8.76569	8.518	7.49629	7.36335	7.45613	7.77167	7.77555	7.68655	7.89506	7.79715	7.4651	7.50274
0	0	0	0	0	0	0	0	0	0	0	0	0	0	0	0	0	1.28332	1.70865	3.91295	4.05998	4.32467	4.50703	5.13724	5.63224	6.33168	6.63463	6.84357	7.3632	7.33763	7.82619	7.94919	8.04449	8.09199	7.63477	7.52491	7.74601	7.91904	8.22913	8.02952	7.11659	6.90065	7.04031	7.29443	7.28841	7.25605	7.44112	7.29693	7.07918	7.04895
0	0	0	0	0	0	0	0	0	0	0	0	0	0	0	0	0	1.2463	1.67406	3.83903	3.94644	4.24084	4.38508	5.06192	5.55791	6.23411	6.5143	6.69418	7.16815	7.15292	7.68529	7.78027	7.84386	7.95305	7.52491	7.35771	7.6177	7.78754	8.05296	7.85842	6.92099	6.81631	6.89215	7.1065	7.14577	7.1455	7.22564	7.19556	6.94462	6.86517
0	0	0	0	0	0	0	0	0	0	0	0	0	0	0	0	0	1.29832	1.74831	3.93994	4.12521	4.37358	4.53117	5.23774	5.71636	6.43441	6.6988	6.88755	7.44393	7.38067	7.91692	8.10987	8.06102	8.2042	7.74601	7.6177	7.81262	8.03415	8.27156	8.0932	7.15431	7.0198	7.11771	7.40443	7.39836	7.31975	7.49442	7.44188	7.19724	7.13254
0	0	0	0	0	0	0	0	0	0	0	0	0	0	0	0	0	1.36458	1.77225	4.05498	4.26208	4.47654	4.67191	5.38708	5.90981	6.61319	6.88318	7.1193	7.64495	7.63252	8.18611	8.24927	8.32265	8.42179	7.91904	7.78754	8.03415	8.27818	8.55822	8.29903	7.33399	7.19736	7.32748	7.52006	7.59882	7.56132	7.67736	7.56632	7.32423	7.36948
0	0	0	0	0	0	0	0	0	0	0	0	0	0	0	0	0	1.40097	1.8335	4.20595	4.39395	4.6099	4.8053	5.53576	6.08004	6.82348	7.14219	7.32366	7.89013	7.89211	8.42899	8.57088	8.58925	8.76569	8.22913	8.05296	8.27156	8.55822	8.87004	8.60525	7.55243	7.40744	7.59741	7.86177	7.86967	7.82368	7.91803	7.92662	7.59999	7.57691
0	0	0	0	0	0	0	0	0	0	0	0	0	0	0	0	0	1.34614	1.7763	4.12631	4.27459	4.52184	4.76473	5.44614	5.96039	6.64207	6.92914	7.17654	7.68676	7.64541	8.20113	8.37688	8.41184	8.518	8.02952	7.85842	8.0932	8.29903	8.60525	8.38239	7.41237	7.25229	7.44305	7.67755	7.66959	7.63131	7.77268	7.67967	7.43602	7.39196
0	0	0	0	0	0	0	0	0	0	0	0	0	0	0	0	0	1.18206	1.58432	3.5885	3.77901	4.00314	4.12562	4.78612	5.21047	5.85992	6.14487	6.28448	6.77523	6.73393	7.24951	7.35891	7.41265	7.49629	7.11659	6.92099	7.15431	7.33399	7.55243	7.41237	6.56408	6.41877	6.47636	6.712	6.78667	6.747	6.83114	6.76331	6.52225	6.54948
0	0	0	0	0	0	0	0	0	0	0	0	0	0	0	0	0	1.17859	1.55815	3.50896	3.69479	3.90842	4.09944	4.70807	5.11577	5.78101	5.99109	6.22619	6.59947	6.65291	7.10304	7.20761	7.28034	7.36335	6.90065	6.81631	7.0198	7.19736	7.40744	7.25229	6.41877	6.34169	6.34603	6.54043	6.64403	6.55665	6.76597	6.5971	6.42084	6.36062
0	0	0	0	0	0	0	0	0	0	0	0	0	0	0	0	0	1.21611	1.58409	3.56633	3.77129	3.97795	4.16991	4.80771	5.22424	5.85306	6.10605	6.29758	6.72961	6.70379	7.19927	7.35392	7.41	7.45613	7.04031	6.89215	7.11771	7.32748	7.59741	7.44305	6.47636	6.34603	6.49218	6.76318	6.75111	6.70632	6.84404	6.77593	6.53599	6.48614
0	0	0	0	0	0	0	0	0	0	0	0	0	0	0	0	0	1.22384	1.62527	3.74809	3.883	4.17573	4.26276	4.96132	5.43762	6.08293	6.31936	6.48787	7.02646	6.95727	7.4961	7.5679	7.65757	7.77167	7.29443	7.1065	7.40443	7.52006	7.86177	7.67755	6.712	6.54043	6.76318	7.00432	6.95944	6.96576	7.08334	7.00104	6.80043	6.73416
0	0	0	0	0	0	0	0	0	0	0	0	0	0	0	0	0	1.24824	1.63034	3.75844	3.90687	4.14452	4.31873	4.97302	5.44394	6.12528	6.34101	6.52604	7.00659	7.02408	7.49208	7.58368	7.67276	7.77555	7.28841	7.14577	7.39836	7.59882	7.86967	7.66959	6.78667	6.64403	6.75111	6.95944	7.06964	6.91691	7.07071	7.03337	6.75131	6.73833
0	0	0	0	0	0	0	0	0	0	0	0	0	0	0	0	0	1.22471	1.60629	3.72883	3.89781	4.10494	4.32309	4.96895	5.39203	6.02135	6.29662	6.53783	6.94842	6.97272	7.40285	7.5891	7.64148	7.68655	7.25605	7.1455	7.31975	7.56132	7.82368	7.63131	6.747	6.55665	6.70632	6.96576	6.91691	6.97211	7.03826	6.97789	6.70805	6.69209
0	0	0	0	0	0	0	0	0	0	0	0	0	0	0	0	0	1.25914	1.67405	3.80782	3.96112	4.20468	4.36695	5.03665	5.55045	6.11432	6.40714	6.70337	7.09682	7.07501	7.60368	7.73375	7.74636	7.89506	7.44112	7.22564	7.49442	7.67736	7.91803	7.77268	6.83114	6.76597	6.84404	7.08334	7.07071	7.03826	7.22916	7.14887	6.89878	6.79657
0	0	0	0	0	0	0	0	0	0	0	0	0	0	0	0	0	1.23622	1.61872	3.75892	3.9146	4.1409	4.3306	4.96703	5.41319	6.09996	6.31523	6.57121	7.07145	7.02742	7.51326	7.66575	7.66737	7.79715	7.29693	7.19556	7.44188	7.56632	7.92662	7.67967	6.76331	6.5971	6.77593	7.00104	7.03337	6.97789	7.14887	7.0641	6.79009	6.74002
0	0	0	0	0	0	0	0	0	0	0	0	0	0	0	0	0	1.18734	1.60333	3.63417	3.7887	4.01292	4.16445	4.81882	5.27758	5.90569	6.16197	6.29608	6.80724	6.77806	7.26538	7.33827	7.37447	7.4651	7.07918	6.94462	7.19724	7.32423	7.59999	7.43602	6.52225	6.42084	6.53599	6.80043	6.75131	6.70805	6.89878	6.79009	6.57267	6.50072
0	0	0	0	0	0	0	0	0	0	0	0	0	0	0	0	0	1.18005	1.57356	3.61343	3.75297	4.021	4.1541	4.76796	5.2171	5.8444	6.12195	6.3418	6.74886	6.70884	7.25212	7.34642	7.33185	7.50274	7.04895	6.86517	7.13254	7.36948	7.57691	7.39196	6.54948	6.36062	6.48614	6.73416	6.73833	6.69209	6.79657	6.74002	6.50072	6.49178
0	0	0	0	0	0	0	0	0	0	0	0	0	0	0	0	0	1.16629	1.53527	3.57439	3.67506	3.93489	4.08674	4.71302	5.17855	5.80115	6.03449	6.21466	6.6563	6.63722	7.09079	7.25994	7.31172	7.37989	6.90873	6.77182	7.02816	7.25682	7.4097	7.25255	6.37434	6.27125	6.42872	6.61571	6.62536	6.6129	6.6917	6.6821	6.45548	6.44301
0	0	0	0	0	0	0	0	0	0	0	0	0	0	0	0	0	1.18039	1.55655	3.58225	3.74086	3.95404	4.1232	4.74478	5.24138	5.85196	6.09398	6.31281	6.76945	6.70567	7.20056	7.29079	7.37948	7.4509	7.06701	6.82803	7.12879	7.31664	7.59636	7.38412	6.48386	6.37395	6.45505	6.70926	6.77256	6.73679	6.8389	6.7648	6.52366	6.48619
0	0	0	0	0	0	0	0	0	0	0	0	0	0	0	0	0	1.2078	1.57416	3.56329	3.75396	3.94178	4.16868	4.77368	5.19025	5.80749	6.02793	6.25682	6.72136	6.75742	7.12071	7.28499	7.28184	7.39291	7.01645	6.84253	7.07111	7.25547	7.50518	7.28299	6.44997	6.37169	6.48607	6.69516	6.70913	6.61861	6.79716	6.71168	6.48589	6.44842
0	0	0	0	0	0	0	0	0	0	0	0	0	0	0	0	0	1.07474	1.45223	3.3235	3.4675	3.64215	3.84249	4.38852	4.81502	5.42109	5.6236	5.79286	6.19968	6.20192	6.65021	6.71708	6.76025	6.79764	6.42847	6.31773	6.52385	6.7426	6.96829	6.74402	5.95711	5.846	5.99925	6.21869	6.21244	6.18192	6.30041	6.22622	5.99598	5.93182
0	0	0	0	0	0	0	0	0	0	0	0	0	0	0	0	0	1.06154	1.39746	3.23957	3.34831	3.54868	3.6945	4.23897	4.64879	5.22392	5.41002	5.62656	6.04668	6.01275	6.41129	6.50142	6.49448	6.60867	6.22186	6.12313	6.31962	6.51507	6.74826	6.59592	5.78126	5.68323	5.75202	6.02041	5.97176	5.95697	6.03737	6.01695	5.8646	5.76981
0	0	0	0	0	0	0	0	0	0	0	0	0	0	0	0	0	0.994593	1.32461	3.01975	3.16833	3.29889	3.40216	3.93983	4.31412	4.87447	5.06197	5.22584	5.62588	5.61982	5.98567	6.08329	6.10947	6.16854	5.84902	5.71923	5.92231	6.07539	6.28293	6.13556	5.42395	5.26272	5.40238	5.60356	5.59484	5.55256	5.70025	5.62049	5.41717	5.38056
0	0	0	0	0	0	0	0	0	0	0	0	0	0	0	0	0	0.877123	1.15827	2.62674	2.75913	2.94743	3.03919	3.52152	3.82684	4.28463	4.47964	4.57754	4.92972	4.91191	5.28688	5.38506	5.40051	5.4411	5.12103	5.02521	5.2008	5.31054	5.50646	5.39999	4.75692	4.68532	4.76217	4.94251	4.97294	4.86454	4.98301	4.93795	4.79756	4.76493
0	0	0	0	0	0	0	0	0	0	0	0	0	0	0	0	0	0.674035	0.883499	2.0139	2.10078	2.25462	2.33727	2.67485	2.94144	3.28661	3.39851	3.56034	3.75528	3.81168	4.02652	4.10477	4.1075	4.20795	3.93278	3.87843	3.99421	4.10429	4.25988	4.18929	3.63964	3.56823	3.67282	3.7866	3.76777	3.75255	3.83537	3.80912	3.69182	3.66984
0	0	0	0	0	0	0	0	0	0	0	0	0	0	0	0	0	0.514881	0.691679	1.57376	1.62182	1.72996	1.7989	2.09105	2.25121	2.55541	2.67188	2.74241	2.9368	2.919	3.10649	3.1766	3.1859	3.22769	3.04308	2.9843	3.11524	3.14508	3.28133	3.2276	2.83208	2.76568	2.83725	2.93568	2.92545	2.89395	2.97201	2.93907	2.82643	2.83596
0	0	0	0	0	0	0	0	0	0	0	0	0	0	0	0	0	0.398877	0.523415	1.18723	1.25842	1.34196	1.38327	1.58368	1.73769	1.95065	2.03234	2.09936	2.27468	2.2471	2.4065	2.45352	2.45434	2.47706	2.33685	2.29905	2.37127	2.42542	2.52922	2.44953	2.16054	2.13107	2.1709	2.25041	2.25565	2.2256	2.30393	2.23031	2.18457	2.15674
0	0	0	0	0	0	0	0	0	0	0	0	0	0	0	0	0	0.335238	0.434879	1.00839	1.05393	1.11081	1.15699	1.3291	1.45489	1.63831	1.70072	1.73574	1.88733	1.86824	1.98719	2.05186	2.04589	2.06448	1.94738	1.91599	1.9762	2.04182	2.09029	2.05444	1.79274	1.79288	1.8223	1.85239	1.87144	1.89425	1.90408	1.86192	1.80877	1.81451
0	0	0	0	0	0	0	0	0	0	0	0	0	0	0	0	0	0.292023	0.369539	0.843392	0.887942	0.937211	0.973021	1.10064	1.22522	1.38852	1.45194	1.47085	1.58092	1.57231	1.71179	1.71275	1.73824	1.75549	1.68428	1.63121	1.67216	1.71479	1.76644	1.73887	1.54956	1.516	1.55026	1.55614	1.59737	1.57868	1.60606	1.57849	1.53421	1.52241
0	0	0	0	0	0	0	0	0	0	0	0	0	0	0	0	0	0.122481	0.165436	0.381959	0.392687	0.418197	0.42735	0.483805	0.5463	0.598454	0.631708	0.648673	0.699106	0.694375	0.762996	0.770381	0.766512	0.763519	0.732572	0.718517	0.743334	0.751211	0.799566	0.779603	0.681849	0.664734	0.682647	0.700892	0.707293	0.697954	0.72587	0.699109	0.674824	0.683263
0	0	0	0	0	0	0	0	0	0	0	0	0	0	0	0	0	0.0920854	0.125186	0.278443	0.285358	0.303019	0.307046	0.358348	0.398827	0.445607	0.447427	0.482377	0.513346	0.511494	0.53445	0.55871	0.555922	0.556115	0.534959	0.525032	0.538564	0.562327	0.574665	0.556038	0.480524	0.48682	0.496535	0.509405	0.525368	0.517343	0.534635	0.504675	0.495401	0.49068
0	0	0	0	0	0	0	0	0	0	0	0	0	0	0	0	0	0.0750089	0.102161	0.228684	0.240292	0.260417	0.259719	0.315884	0.334672	0.374866	0.39942	0.410427	0.43712	0.446449	0.465884	0.479943	0.472386	0.478556	0.446049	0.45431	0.465678	0.464078	0.482853	0.478937	0.435779	0.412225	0.432681	0.432344	0.440323	0.434826	0.432732	0.436672	0.423214	0.414575
0	0	0	0	0	0	0	0	0	0	0	0	0	0	0	0	0	0.059142	0.0801798	0.17892	0.181574	0.20085	0.208832	0.228824	0.26775	0.289749	0.304128	0.322224	0.337362	0.330662	0.36534	0.376938	0.370276	0.375796	0.362089	0.354663	0.361654	0.360655	0.38445	0.389556	0.337712	0.322968	0.341416	0.329748	0.33976	0.333318	0.352869	0.342278	0.328047	0.334957
0	0	0	0	0	0	0	0	0	0	0	0	0	0	0	0	0	0.0374879	0.0520187	0.117627	0.121707	0.135709	0.13851	0.160004	0.174443	0.18406	0.202718	0.203527	0.227893	0.223657	0.244223	0.242133	0.254508	0.240461	0.235692	0.233711	0.235879	0.244939	0.254213	0.237418	0.213055	0.201467	0.210233	0.213357	0.222029	0.227157	0.221954	0.226316	0.212932	0.220801
0	0	0	0	0	0	0	0	0	0	0	0	0	0	0	0	0	0.0268092	0.0346849	0.0815098	0.0852812	0.0952956	0.0957019	0.110376	0.129072	0.138566	0.142344	0.148604	0.158318	0.152344	0.163713	0.168924	0.166281	0.176505	0.158569	0.15883	0.170891	0.165873	0.173771	0.17357	0.149598	0.154413	0.14996	0.160512	0.162439	0.159019	0.165597	0.151603	0.156309	0.150595
0	0	0	0	0	0	0	0	0	0	0	0	0	0	0	0	0	0.0216321	0.0227988	0.0582192	0.0555146	0.063684	0.0676182	0.0736032	0.0767006	0.0896495	0.097858	0.0996167	0.0982914	0.106417	0.111457	0.111876	0.108873	0.113076	0.1075	0.106442	0.106071	0.110724	0.114396	0.111551	0.0989645	0.0993264	0.098478	0.105844	0.100807	0.104467	0.105003	0.109152	0.100969	0.103869
0	0	0	0	0	0	0	0	0	0	0	0	0	0	0	0	0	0.0126656	0.016691	0.0426553	0.0423565	0.0449157	0.0461724	0.0521395	0.0603986	0.0658537	0.0691162	0.0691922	0.0750264	0.0734806	0.0825298	0.0791388	0.0860749	0.080673	0.0739573	0.0724937	0.0772398	0.0813536	0.0822734	0.0827341	0.0718384	0.0719487	0.0704989	0.0746113	0.0730205	0.0702831	0.0737341	0.0740442	0.0745878	0.0674254
0	0	0	0	0	0	0	0	0	0	0	0	0	0	0	0	0	0.00965839	0.0159463	0.0319002	0.0327191	0.0361041	0.039703	0.0445442	0.0492377	0.0493039	0.0538409	0.0584698	0.0615569	0.0624907	0.065886	0.0630713	0.0687514	0.0655541	0.0638221	0.061018	0.0638988	0.065453	0.0671533	0.0634351	0.0627771	0.0581392	0.0576511	0.0545285	0.0603464	0.0626085	0.0583966	0.0549695	0.059701	0.0574099
0	0	0	0	0	0	0	0	0	0	0	0	0	0	0	0	0	0.0107237	0.00957302	0.0248172	0.0270481	0.0254159	0.0264741	0.0304347	0.0315705	0.0397635	0.0419183	0.0425853	0.0427332	0.0489147	0.0494493	0.0468205	0.0499908	0.0525359	0.0470555	0.0449052	0.0482806	0.0534114	0.0481303	0.0506499	0.0457314	0.0426866	0.0416695	0.0451941	0.0459894	0.043121	0.0444517	0.0437098	0.0453279	0.0457819
0	0	0	0	0	0	0	0	0	0	0	0	0	0	0	0	0	0.00548948	0.00832067	0.0155593	0.0190612	0.0202321	0.0173551	0.0243279	0.024967	0.0264748	0.0277174	0.0257702	0.0283482	0.029743	0.0324327	0.031381	0.0315579	0.0336012	0.0320322	0.028819	0.0332173	0.0318586	0.035786	0.032216	0.0280891	0.0323271	0.027465	0.0273518	0.031603	0.0299426	0.0302225	0.0292572	0.030712	0.0314504
0	0	0	0	0	0	0	0	0	0	0	0	0	0	0	0	0	0.00423214	0.006977	0.0138549	0.013295	0.013341	0.0140817	0.016443	0.0193522	0.0220954	0.0213379	0.0221925	0.0229427	0.0230971	0.0252807	0.0260619	0.025924	0.0274641	0.0242222	0.0270237	0.026231	0.0252458	0.0290713	0.0277899	0.0234165	0.0231158	0.0205768	0.026809	0.0248886	0.0245663	0.0248341	0.0244418	0.0219514	0.0209785
0	0	0	0	0	0	0	0	0	0	0	0	0	0	0	0	0	0.00243326	0.00336594	0.00717786	0.0102961	0.00835976	0.00864264	0.00961599	0.0108856	0.0162476	0.0125123	0.015442	0.0161086	0.0175475	0.0171551	0.0180019	0.0178737	0.0161071	0.0177279	0.0160642	0.0160266	0.0177032	0.0169951	0.0187487	0.0141916	0.0158284	0.0145268	0.0133231	0.0144358	0.0164981	0.0152905	0.0150331	0.0160381	0.0143212
0	0	0	0	0	0	0	0	0	0	0	0	0	0	0	0	0	0.00117773	0.00223227	0.00486953	0.00464179	0.00532627	0.00718399	0.00592116	0.00700579	0.00806	0.00727075	0.00826535	0.00807267	0.0108541	0.00994462	0.00899311	0.00996156	0.00903247	0.0102527	0.0104757	0.00771561	0.0109122	0.00838275	0.00937663	0.00926648	0.00988746	0.00916637	0.00801813	0.00890566	0.0107551	0.0111886	0.00907761	0.00967018	0.00803198
0	0	0	0	0	0	0	0	0	0	0	0	0	0	0	0	0	0.000748918	0.000896489	0.00277544	0.00313316	0.00382959	0.00437081	0.00476244	0.00395201	0.00471953	0.00493164	0.00423401	0.00548633	0.00518116	0.00591796	0.00533967	0.00433736	0.00746371	0.00453499	0.00618913	0.00516116	0.00511761	0.00692942	0.0059283	0.00423828	0.00537408	0.00454647	0.00519854	0.00609243	0.00565965	0.00752493	0.00385785	0.00446397	0.00395534
0	0	0	0	0	0	0	0	0	0	0	0	0	0	0	0	0	0.000850975	0.0010395	0.00232411	0.0031532	0.0020784	0.00242199	0.00339526	0.00300523	0.00506697	0.00420379	0.00456808	0.00470519	0.00467608	0.00472629	0.00448799	0.00551891	0.00539412	0.00454176	0.00479336	0.00516768	0.00469641	0.00460225	0.00581852	0.00551149	0.00379072	0.00499856	0.00473465	0.0036385	0.00405649	0.00406585	0.00592595	0.00408766	0.00446086
0	0	0	0	0	0	0	0	0	0	0	0	0	0	0	0	0	0.000289512	0.000404718	0.00139399	0.00158911	0.00193448	0.00162874	0.00304761	0.00163783	0.00324507	0.00262792	0.00358259	0.0030861	0.00326261	0.00277945	0.00251082	0.00325628	0.00437035	0.00214975	0.00276833	0.00284839	0.00329638	0.00227522	0.00355149	0.00258363	0.00325233	0.00222927	0.0023225	0.00221986	0.00358592	0.00379431	0.00196928	0.00383915	0.00279807
0	0	0	0	0	0	0	0	0	0	0	0	0	0	0	0	0	0.00047058	0.000312757	0.000971884	0.00141206	0.00134172	0.00122565	0.00134848	0.0013237	0.00240445	0.00192564	0.0015586	0.00164129	0.00152679	0.00175698	0.00141085	0.0019516	0.00143457	0.00144576	0.0022823	0.0020764	0.00200745	0.0018334	0.0017506	0.0018582	0.00169415	0.0017829	0.00177025	0.00175366	0.00189072	0.00171173	0.0017859	0.00168291	0.00130737
0	0	0	0	0	0	0	0	0	0	0	0	0	0	0	0	0	6.29563e-05	0.000126534	0.000175581	0.00044239	0.000568187	0.000546474	0.00021187	0.000791854	0.000753103	0.000406607	0.000556595	0.000388397	0.000637861	0.0011406	0.00137379	0.00109334	0.00088154	0.000812582	0.000515729	0.000851445	0.00109276	0.000562965	0.00091494	0.000980266	0.000578283	0.000480881	0.00111769	0.000826273	0.000538751	0.000710502	0.000656708	0.000747975	0.000389388
0	0	0	0	0	0	0	0	0	0	0	0	0	0	0	0	0	0.000191301	0.000254733	0.000349684	0.000328482	0.000414226	0.000425102	0.000522937	0.000718434	0.000501333	0.000597339	0.000720545	0.00073511	0.000774893	0.000645738	0.000682902	0.000767509	0.000578345	0.000759196	0.000863011	0.000625589	0.000657001	0.000699291	0.000694359	0.000528024	0.000607058	0.00065309	0.000638503	0.000452276	0.000931049	0.000616223	0.000575754	0.00077262	0.000918921
0	0	0	0	0	0	0	0	0	0	0	0	0	0	0	0	0	0.000102579	9.53554e-05	0.000218407	0.000208453	0.000221498	0.000464179	0.000200866	0.000268577	0.000653461	0.000812373	0.000452558	0.00026944	0.000367713	0.000421625	0.000414194	0.00048027	0.000942597	0.000508732	0.000296595	0.000281787	0.000351447	0.000761077	0.000465321	0.000385628	0.000176072	0.000682388	0.000270916	0.000733801	0.000440705	0.000284206	0.000254153	0.000642229	0.000617762
0	0	0	0	0	0	0	0	0	0	0	0	0	0	0	0	0	6.06128e-06	2.42477e-05	2.42477e-05	4.24316e-05	0.000159986	0.000280844	0.000172112	0.000247232	9.0927e-05	0.000222987	6.0618e-05	0.00070257	0.000248155	5.45567e-05	0.000226666	0.000563527	0.000311153	0.00020572	9.0927e-05	0.000610183	0.000492628	0.000305091	0.00060926	0.000211782	0.000259357	0.000323275	0.000153925	4.24316e-05	0.000242091	7.88019e-05	0.00043991	0.000129677	0.000445972
0	0	0	0	0	0	0	0	0	0	0	0	0	0	0	0	0	0	0	0	0	0	0	0	0	0	0	0	0	0	0	0	0	0	0	0	0	0	0	0	0	0	0	0	0	0	0	0	0	0
0	0	0	0	0	0	0	0	0	0	0	0	0	0	0	0	0	2.83992e-06	0.000127274	9.3456e-05	0.000121853	9.06161e-05	0.00012708	0.00018362	0.000237124	4.8276e-05	0.000245644	0.000133212	0.000186912	0.000119013	0.000322254	0.00014696	0.000220537	0.000217245	0.000203497	0.000203497	0.000262877	0.000130372	0.000203497	0.000342133	8.2355e-05	0.000322254	0.000121853	0.000113333	0.000313541	0.000412418	0.000330321	0.000161159	0.000268556	0.000293661
0	0	0	0	0	0	0	0	0	0	0	0	0	0	0	0	0	0	0	0	0	0	0	0	0	0	0	0	0	0	0	0	0	0	0	0	0	0	0	0	0	0	0	0	0	0	0	0	0	0
0	0	0	0	0	0	0	0	0	0	0	0	0	0	0	0	0	0	0	0	0	0	0	0	0	0	0	0	0	0	0	0	0	0	0	0	0	0	0	0	0	0	0	0	0	0	0	0	0	0
0	0	0	0	0	0	0	0	0	0	0	0	0	0	0	0	0	0	0	0	0	0	0	0	0	0	0	0	0	0	0	0	0	0	0	0	0	0	0	0	0	0	0	0	0	0	0	0	0	0
0	0	0	0	0	0	0	0	0	0	0	0	0	0	0	0	0	0	0	0	0	0	0	0	0	0	0	0	0	0	0	0	0	0	0	0	0	0	0	0	0	0	0	0	0	0	0	0	0	0
0	0	0	0	0	0	0	0	0	0	0	0	0	0	0	0	0	0	0	0	0	0	0	0	0	0	0	0	0	0	0	0	0	0	0	0	0	0	0	0	0	0	0	0	0	0	0	0	0	0
0	0	0	0	0	0	0	0	0	0	0	0	0	0	0	0	0	0	0	0	0	0	0	0	0	0	0	0	0	0	0	0	0	0	0	0	0	0	0	0	0	0	0	0	0	0	0	0	0	0
0	0	0	0	0	0	0	0	0	0	0	0	0	0	0	0	0	0	0	0	0	0	0	0	0	0	0	0	0	0	0	0	0	0	0	0	0	0	0	0	0	0	0	0	0	0	0	0	0	0
0	0	0	0	0	0	0	0	0	0	0	0	0	0	0	0	0	0	0	0	0	0	0	0	0	0	0	0	0	0	0	0	0	0	0	0	0	0	0	0	0	0	0	0	0	0	0	0	0	0
0	0	0	0	0	0	0	0	0	0	0	0	0	0	0	0	0	0	0	0	0	0	0	0	0	0	0	0	0	0	0	0	0	0	0	0	0	0	0	0	0	0	0	0	0	0	0	0	0	0
0	0	0	0	0	0	0	0	0	0	0	0	0	0	0	0	0	0	0	0	0	0	0	0	0	0	0	0	0	0	0	0	0	0	0	0	0	0	0	0	0	0	0	0	0	0	0	0	0	0
0	0	0	0	0	0	0	0	0	0	0	0	0	0	0	0	0	0	0	0	0	0	0	0	0	0	0	0	0	0	0	0	0	0	0	0	0	0	0	0	0	0	0	0	0	0	0	0	0	0
0	0	0	0	0	0	0	0	0	0	0	0	0	0	0	0	0	0	0	0	0	0	0	0	0	0	0	0	0	0	0	0	0	0	0	0	0	0	0	0	0	0	0	0	0	0	0	0	0	0
0	0	0	0	0	0	0	0	0	0	0	0	0	0	0	0	0	0	0	0	0	0	0	0	0	0	0	0	0	0	0	0	0	0	0	0	0	0	0	0	0	0	0	0	0	0	0	0	0	0
0	0	0	0	0	0	0	0	0	0	0	0	0	0	0	0	0	0	0	0	0	0	0	0	0	0	0	0	0	0	0	0	0	0	0	0	0	0	0	0	0	0	0	0	0	0	0	0	0	0
General community
0.936023	0.950618	0.925722	0.916384	0.885243	0.927649	0.94454	0.921654	0.95295	0.847107	0.762117	0.847262	0.860097	0.945277	1.0151	1.00494	1.07609	1.17535	1.23857	1.26801	1.20417	1.24697	1.22506	1.24633	1.25481	1.33678	1.35064	1.36188	1.43403	1.40746	1.47634	1.49471	1.494	1.5156	1.41859	1.35339	1.39076	1.43295	1.47521	1.44081	1.27826	1.25413	1.28238	1.33425	1.34262	1.34398	1.3803	1.37762	1.3432	1.35525
0.950618	0.965441	0.940156	0.930673	0.899046	0.942113	0.959268	0.936025	0.967809	0.860316	0.774001	0.860473	0.873508	0.960017	1.03093	1.02061	1.09287	1.19368	1.25789	1.28779	1.22295	1.26642	1.24416	1.26576	1.27438	1.35762	1.3717	1.38311	1.45639	1.42941	1.49936	1.51802	1.51729	1.53923	1.44071	1.37449	1.41245	1.4553	1.49822	1.46328	1.29819	1.27369	1.30238	1.35505	1.36356	1.36493	1.40183	1.3991	1.36415	1.37638
0.925722	0.940156	0.915534	0.906299	0.875501	0.91744	0.934145	0.911511	0.942462	0.837785	0.75373	0.837938	0.850631	0.934874	1.00393	0.993883	1.06424	1.16242	1.22494	1.25406	1.19092	1.23325	1.21158	1.23261	1.241	1.32207	1.33577	1.34689	1.41825	1.39197	1.4601	1.47826	1.47756	1.49892	1.40298	1.33849	1.37545	1.41718	1.45898	1.42496	1.26419	1.24033	1.26827	1.31956	1.32784	1.32919	1.36511	1.36245	1.32842	1.34034
0.916384	0.930673	0.906299	0.897157	0.86667	0.908186	0.924722	0.902316	0.932956	0.829334	0.746127	0.829485	0.842051	0.925444	0.993803	0.983858	1.05351	1.15069	1.21259	1.24141	1.17891	1.22081	1.19936	1.22018	1.22848	1.30873	1.3223	1.3333	1.40395	1.37793	1.44537	1.46335	1.46265	1.4838	1.38883	1.32499	1.36158	1.40289	1.44426	1.41058	1.25144	1.22782	1.25548	1.30625	1.31445	1.31578	1.35134	1.34871	1.31502	1.32682
0.885243	0.899046	0.875501	0.86667	0.837218	0.877323	0.893298	0.871653	0.901251	0.801151	0.720772	0.801297	0.813436	0.893995	0.960031	0.950424	1.01771	1.11159	1.17138	1.19922	1.13885	1.17932	1.1586	1.17872	1.18674	1.26426	1.27736	1.288	1.35624	1.3311	1.39625	1.41362	1.41295	1.43338	1.34163	1.27996	1.31531	1.35521	1.39518	1.36265	1.20891	1.18609	1.21281	1.26186	1.26978	1.27106	1.30542	1.30288	1.27033	1.28173
0.927649	0.942113	0.91744	0.908186	0.877323	0.91935	0.936089	0.913408	0.944424	0.839529	0.755299	0.839682	0.852402	0.93682	1.00602	0.995952	1.06646	1.16484	1.22749	1.25667	1.1934	1.23582	1.2141	1.23518	1.24358	1.32482	1.33855	1.34969	1.4212	1.39487	1.46314	1.48134	1.48063	1.50204	1.4059	1.34128	1.37832	1.42013	1.46202	1.42792	1.26682	1.24291	1.27091	1.32231	1.33061	1.33195	1.36795	1.36529	1.33119	1.34313
0.94454	0.959268	0.934145	0.924722	0.893298	0.936089	0.953134	0.93004	0.961621	0.854815	0.769052	0.854971	0.867923	0.953878	1.02434	1.01409	1.08588	1.18605	1.24984	1.27955	1.21513	1.25832	1.23621	1.25767	1.26623	1.34894	1.36293	1.37427	1.44708	1.42027	1.48978	1.50831	1.50759	1.52939	1.4315	1.3657	1.40341	1.44599	1.48864	1.45392	1.28989	1.26554	1.29405	1.34639	1.35484	1.35621	1.39286	1.39015	1.35542	1.36758
0.921654	0.936025	0.911511	0.902316	0.871653	0.913408	0.93004	0.907505	0.938321	0.834103	0.750418	0.834255	0.846893	0.930766	0.999518	0.989516	1.05957	1.15731	1.21956	1.24855	1.18569	1.22783	1.20625	1.2272	1.23555	1.31626	1.3299	1.34097	1.41202	1.38585	1.45368	1.47176	1.47106	1.49233	1.39682	1.33261	1.36941	1.41095	1.45257	1.4187	1.25863	1.23488	1.2627	1.31376	1.32201	1.32334	1.35911	1.35647	1.32258	1.33445
0.95295	0.967809	0.942462	0.932956	0.901251	0.944424	0.961621	0.938321	0.970182	0.862426	0.775899	0.862584	0.87565	0.962371	1.03346	1.02312	1.09555	1.19661	1.26097	1.29094	1.22595	1.26952	1.24721	1.26887	1.2775	1.36095	1.37506	1.38651	1.45997	1.43291	1.50304	1.52174	1.52101	1.54301	1.44425	1.37786	1.41591	1.45886	1.50189	1.46687	1.30137	1.27681	1.30557	1.35837	1.3669	1.36828	1.40526	1.40253	1.36749	1.37976
0.847107	0.860316	0.837785	0.829334	0.801151	0.839529	0.854815	0.834103	0.862426	0.766638	0.689721	0.766778	0.778394	0.855483	0.918674	0.90948	0.973867	1.0637	1.12092	1.14756	1.08979	1.12852	1.10869	1.12794	1.13561	1.20979	1.22234	1.23251	1.29781	1.27376	1.3361	1.35272	1.35208	1.37163	1.28384	1.22482	1.25865	1.29683	1.33508	1.30395	1.15683	1.135	1.16057	1.2075	1.21508	1.21631	1.24918	1.24675	1.21561	1.22651
0.762117	0.774001	0.75373	0.746127	0.720772	0.755299	0.769052	0.750418	0.775899	0.689721	0.620522	0.689847	0.700297	0.769652	0.826503	0.818232	0.876159	0.95698	1.00846	1.03243	0.980447	1.01529	0.997454	1.01477	1.02168	1.08842	1.0997	1.10885	1.1676	1.14596	1.20205	1.217	1.21642	1.23401	1.15503	1.10194	1.13237	1.16672	1.20113	1.17312	1.04077	1.02112	1.04413	1.08635	1.09317	1.09428	1.12385	1.12167	1.09365	1.10346
0.847262	0.860473	0.837938	0.829485	0.801297	0.839682	0.854971	0.834255	0.862584	0.766778	0.689847	0.766918	0.778536	0.855639	0.918842	0.909646	0.974044	1.0639	1.12112	1.14777	1.08998	1.12872	1.10889	1.12814	1.13582	1.21002	1.22256	1.23273	1.29805	1.27399	1.33635	1.35297	1.35232	1.37188	1.28407	1.22505	1.25888	1.29707	1.33532	1.30418	1.15704	1.13521	1.16078	1.20772	1.2153	1.21653	1.24941	1.24698	1.21583	1.22674
0.860097	0.873508	0.850631	0.842051	0.813436	0.852402	0.867923	0.846893	0.87565	0.778394	0.700297	0.778536	0.790329	0.8686	0.932761	0.923426	0.9888	1.08001	1.13811	1.16516	1.1065	1.14582	1.12569	1.14523	1.15303	1.22835	1.24108	1.25141	1.31771	1.29329	1.35659	1.37347	1.37281	1.39266	1.30352	1.2436	1.27795	1.31672	1.35555	1.32394	1.17457	1.1524	1.17836	1.22602	1.23371	1.23496	1.26834	1.26587	1.23425	1.24532
0.945277	0.960017	0.934874	0.925444	0.893995	0.93682	0.953878	0.930766	0.962371	0.855483	0.769652	0.855639	0.8686	0.954623	1.02514	1.01488	1.08673	1.18697	1.25082	1.28055	1.21608	1.2593	1.23717	1.25865	1.26722	1.35	1.36399	1.37534	1.44821	1.42138	1.49094	1.50949	1.50877	1.53058	1.43262	1.36677	1.40451	1.44712	1.4898	1.45506	1.29089	1.26653	1.29506	1.34744	1.35589	1.35726	1.39395	1.39124	1.35648	1.36865
1.0151	1.03093	1.00393	0.993803	0.960031	1.00602	1.02434	0.999518	1.03346	0.918674	0.826503	0.918842	0.932761	1.02514	1.10086	1.08984	1.167	1.27465	1.34321	1.37514	1.30591	1.35232	1.32856	1.35162	1.36082	1.44972	1.46474	1.47693	1.55519	1.52637	1.60107	1.62099	1.62021	1.64364	1.53844	1.46772	1.50826	1.55401	1.59985	1.56254	1.38625	1.36009	1.39072	1.44697	1.45605	1.45752	1.49692	1.494	1.45668	1.46975
1.00494	1.02061	0.993883	0.983858	0.950424	0.995952	1.01409	0.989516	1.02312	0.90948	0.818232	0.909646	0.923426	1.01488	1.08984	1.07894	1.15532	1.26189	1.32977	1.36138	1.29284	1.33879	1.31526	1.3381	1.3472	1.43521	1.45009	1.46215	1.53962	1.51109	1.58505	1.60477	1.604	1.62719	1.52305	1.45304	1.49316	1.53846	1.58384	1.5469	1.37237	1.34648	1.37681	1.43249	1.44148	1.44293	1.48194	1.47905	1.4421	1.45504
1.07609	1.09287	1.06424	1.05351	1.01771	1.06646	1.08588	1.05957	1.09555	0.973867	0.876159	0.974044	0.9888	1.08673	1.167	1.15532	1.23711	1.35123	1.42391	1.45776	1.38436	1.43357	1.40838	1.43283	1.44258	1.53681	1.55274	1.56567	1.64862	1.61807	1.69726	1.71838	1.71756	1.74239	1.63087	1.5559	1.59887	1.64738	1.69596	1.65641	1.46953	1.4418	1.47428	1.5339	1.54353	1.54509	1.58685	1.58376	1.5442	1.55805
1.17535	1.19368	1.16242	1.15069	1.11159	1.16484	1.18605	1.15731	1.19661	1.0637	0.95698	1.0639	1.08001	1.18697	1.27465	1.26189	1.35123	1.47587	1.55526	1.59223	1.51206	1.56581	1.53829	1.565	1.57565	1.67858	1.69598	1.71009	1.8007	1.76733	1.85383	1.87689	1.87599	1.90312	1.78131	1.69943	1.74636	1.79934	1.85241	1.80921	1.60509	1.5748	1.61027	1.6754	1.68591	1.68761	1.73323	1.72985	1.68664	1.70177
1.23857	1.25789	1.22494	1.21259	1.17138	1.22749	1.24984	1.21956	1.26097	1.12092	1.00846	1.12112	1.13811	1.25082	1.34321	1.32977	1.42391	1.55526	1.63892	1.67788	1.5934	1.65003	1.62104	1.64918	1.6604	1.76887	1.7872	1.80208	1.89756	1.86239	1.95354	1.97785	1.9769	2.00549	1.87713	1.79084	1.8403	1.89612	1.95205	1.90653	1.69143	1.65951	1.69689	1.76551	1.7766	1.77839	1.82646	1.8229	1.77737	1.79331
1.26801	1.28779	1.25406	1.24141	1.19922	1.25667	1.27955	1.24855	1.29094	1.14756	1.03243	1.14777	1.16516	1.28055	1.37514	1.36138	1.45776	1.59223	1.67788	1.71776	1.63127	1.68925	1.65957	1.68838	1.69987	1.81091	1.82969	1.84491	1.94266	1.90666	1.99998	2.02486	2.02389	2.05316	1.92175	1.83341	1.88404	1.94119	1.99845	1.95185	1.73163	1.69895	1.73722	1.80748	1.81882	1.82066	1.86987	1.86623	1.81961	1.83594
1.20417	1.22295	1.19092	1.17891	1.13885	1.1934	1.21513	1.18569	1.22595	1.08979	0.980447	1.08998	1.1065	1.21608	1.30591	1.29284	1.38436	1.51206	1.5934	1.63127	1.54914	1.6042	1.57602	1.60338	1.61429	1.71974	1.73757	1.75203	1.84485	1.81067	1.89929	1.92291	1.92199	1.94978	1.82499	1.7411	1.78918	1.84346	1.89783	1.85358	1.64445	1.61341	1.64976	1.71648	1.72725	1.729	1.77573	1.77227	1.728	1.7435
1.24697	1.26642	1.23325	1.22081	1.17932	1.23582	1.25832	1.22783	1.26952	1.12852	1.01529	1.12872	1.14582	1.2593	1.35232	1.33879	1.43357	1.56581	1.65003	1.68925	1.6042	1.66122	1.63203	1.66036	1.67166	1.78086	1.79932	1.8143	1.91042	1.87502	1.96679	1.99126	1.99031	2.01908	1.88985	1.80298	1.85277	1.90898	1.96528	1.91946	1.7029	1.67076	1.70839	1.77749	1.78864	1.79045	1.83884	1.83526	1.78942	1.80547
1.22506	1.24416	1.21158	1.19936	1.1586	1.2141	1.23621	1.20625	1.24721	1.10869	0.997454	1.10889	1.12569	1.23717	1.32856	1.31526	1.40838	1.53829	1.62104	1.65957	1.57602	1.63203	1.60335	1.63119	1.64229	1.74957	1.76771	1.78242	1.87685	1.84208	1.93223	1.95627	1.95533	1.98361	1.85665	1.7713	1.82022	1.87544	1.93075	1.88573	1.67297	1.6414	1.67838	1.74625	1.75721	1.75899	1.80653	1.80301	1.75798	1.77375
1.24633	1.26576	1.23261	1.22018	1.17872	1.23518	1.25767	1.2272	1.26887	1.12794	1.01477	1.12814	1.14523	1.25865	1.35162	1.3381	1.43283	1.565	1.64918	1.68838	1.60338	1.66036	1.63119	1.65951	1.6708	1.77994	1.7984	1.81336	1.90944	1.87406	1.96578	1.99023	1.98928	2.01804	1.88888	1.80205	1.85182	1.908	1.96427	1.91847	1.70202	1.6699	1.70751	1.77657	1.78772	1.78953	1.8379	1.83432	1.7885	1.80454
1.25481	1.27438	1.241	1.22848	1.18674	1.24358	1.26623	1.23555	1.2775	1.13561	1.02168	1.13582	1.15303	1.26722	1.36082	1.3472	1.44258	1.57565	1.6604	1.69987	1.61429	1.67166	1.64229	1.6708	1.68217	1.79206	1.81063	1.8257	1.92243	1.88681	1.97915	2.00377	2.00282	2.03178	1.90173	1.81432	1.86442	1.92098	1.97764	1.93152	1.7136	1.68126	1.71913	1.78866	1.79989	1.8017	1.8504	1.8468	1.80067	1.81682
1.33678	1.35762	1.32207	1.30873	1.26426	1.32482	1.34894	1.31626	1.36095	1.20979	1.08842	1.21002	1.22835	1.35	1.44972	1.43521	1.53681	1.67858	1.76887	1.81091	1.71974	1.78086	1.74957	1.77994	1.79206	1.90912	1.92891	1.94496	2.04801	2.01006	2.10844	2.13467	2.13365	2.1645	2.02596	1.93283	1.98621	2.04647	2.10683	2.0577	1.82554	1.79109	1.83143	1.9055	1.91746	1.9194	1.97128	1.96744	1.91829	1.9355
1.35064	1.3717	1.33577	1.3223	1.27736	1.33855	1.36293	1.3299	1.37506	1.22234	1.0997	1.22256	1.24108	1.36399	1.46474	1.45009	1.55274	1.69598	1.7872	1.82969	1.73757	1.79932	1.76771	1.7984	1.81063	1.92891	1.94891	1.96513	2.06924	2.0309	2.1303	2.1568	2.15577	2.18694	2.04696	1.95287	2.0068	2.06768	2.12867	2.07903	1.84446	1.80966	1.85042	1.92525	1.93734	1.9393	1.99171	1.98783	1.93818	1.95557
1.36188	1.38311	1.34689	1.3333	1.288	1.34969	1.37427	1.34097	1.38651	1.23251	1.10885	1.23273	1.25141	1.37534	1.47693	1.46215	1.56567	1.71009	1.80208	1.84491	1.75203	1.8143	1.78242	1.81336	1.8257	1.94496	1.96513	1.98148	2.08647	2.0478	2.14803	2.17475	2.17371	2.20514	2.064	1.96912	2.0235	2.08489	2.14638	2.09633	1.85981	1.82472	1.86582	1.94128	1.95346	1.95544	2.00829	2.00438	1.95431	1.97184
1.43403	1.45639	1.41825	1.40395	1.35624	1.4212	1.44708	1.41202	1.45997	1.29781	1.1676	1.29805	1.31771	1.44821	1.55519	1.53962	1.64862	1.8007	1.89756	1.94266	1.84485	1.91042	1.87685	1.90944	1.92243	2.04801	2.06924	2.08647	2.19701	2.1563	2.26183	2.28997	2.28888	2.32197	2.17336	2.07345	2.13071	2.19535	2.2601	2.2074	1.95835	1.92139	1.96468	2.04413	2.05696	2.05904	2.11469	2.11058	2.05785	2.07631
1.40746	1.42941	1.39197	1.37793	1.3311	1.39487	1.42027	1.38585	1.43291	1.27376	1.14596	1.27399	1.29329	1.42138	1.52637	1.51109	1.61807	1.76733	1.86239	1.90666	1.81067	1.87502	1.84208	1.87406	1.88681	2.01006	2.0309	2.0478	2.1563	2.11634	2.21992	2.24754	2.24646	2.27894	2.13308	2.03503	2.09123	2.15467	2.21822	2.16649	1.92206	1.88579	1.92827	2.00625	2.01884	2.02088	2.07551	2.07147	2.01972	2.03784
1.47634	1.49936	1.4601	1.44537	1.39625	1.46314	1.48978	1.45368	1.50304	1.3361	1.20205	1.33635	1.35659	1.49094	1.60107	1.58505	1.69726	1.85383	1.95354	1.99998	1.89929	1.96679	1.93223	1.96578	1.97915	2.10844	2.1303	2.14803	2.26183	2.21992	2.32857	2.35754	2.35641	2.39048	2.23748	2.13463	2.19358	2.26013	2.32679	2.27253	2.01613	1.97808	2.02264	2.10444	2.11765	2.11979	2.17709	2.17285	2.11857	2.13758
1.49471	1.51802	1.47826	1.46335	1.41362	1.48134	1.50831	1.47176	1.52174	1.35272	1.217	1.35297	1.37347	1.50949	1.62099	1.60477	1.71838	1.87689	1.97785	2.02486	1.92291	1.99126	1.95627	1.99023	2.00377	2.13467	2.1568	2.17475	2.28997	2.24754	2.35754	2.38686	2.38572	2.42022	2.26532	2.16119	2.22087	2.28824	2.35573	2.3008	2.04121	2.00269	2.0478	2.13062	2.144	2.14616	2.20417	2.19988	2.14493	2.16417
1.494	1.51729	1.47756	1.46265	1.41295	1.48063	1.50759	1.47106	1.52101	1.35208	1.21642	1.35232	1.37281	1.50877	1.62021	1.604	1.71756	1.87599	1.9769	2.02389	1.92199	1.99031	1.95533	1.98928	2.00282	2.13365	2.15577	2.17371	2.28888	2.24646	2.35641	2.38572	2.38459	2.41906	2.26423	2.16015	2.21981	2.28715	2.35461	2.2997	2.04024	2.00174	2.04683	2.12961	2.14297	2.14514	2.20312	2.19883	2.1439	2.16313
1.5156	1.53923	1.49892	1.4838	1.43338	1.50204	1.52939	1.49233	1.54301	1.37163	1.23401	1.37188	1.39266	1.53058	1.64364	1.62719	1.74239	1.90312	2.00549	2.05316	1.94978	2.01908	1.98361	2.01804	2.03178	2.1645	2.18694	2.20514	2.32197	2.27894	2.39048	2.42022	2.41906	2.45404	2.29697	2.19139	2.2519	2.32022	2.38865	2.33295	2.06974	2.03068	2.07642	2.1604	2.17396	2.17615	2.23497	2.23062	2.1749	2.19441
1.41859	1.44071	1.40298	1.38883	1.34163	1.4059	1.4315	1.39682	1.44425	1.28384	1.15503	1.28407	1.30352	1.43262	1.53844	1.52305	1.63087	1.78131	1.87713	1.92175	1.82499	1.88985	1.85665	1.88888	1.90173	2.02596	2.04696	2.064	2.17336	2.13308	2.23748	2.26532	2.26423	2.29697	2.14996	2.05113	2.10777	2.17172	2.23577	2.18363	1.93727	1.90071	1.94352	2.02212	2.03481	2.03687	2.09193	2.08785	2.0357	2.05396
1.35339	1.37449	1.33849	1.32499	1.27996	1.34128	1.3657	1.33261	1.37786	1.22482	1.10194	1.22505	1.2436	1.36677	1.46772	1.45304	1.5559	1.69943	1.79084	1.83341	1.7411	1.80298	1.7713	1.80205	1.81432	1.93283	1.95287	1.96912	2.07345	2.03503	2.13463	2.16119	2.16015	2.19139	2.05113	1.95684	2.01088	2.07189	2.133	2.08326	1.84822	1.81334	1.85418	1.92917	1.94128	1.94324	1.99577	1.99188	1.94212	1.95954
1.39076	1.41245	1.37545	1.36158	1.31531	1.37832	1.40341	1.36941	1.41591	1.25865	1.13237	1.25888	1.27795	1.40451	1.50826	1.49316	1.59887	1.74636	1.8403	1.88404	1.78918	1.85277	1.82022	1.85182	1.86442	1.98621	2.0068	2.0235	2.13071	2.09123	2.19358	2.22087	2.21981	2.2519	2.10777	2.01088	2.06642	2.1291	2.1919	2.14079	1.89926	1.86341	1.90539	1.98245	1.99489	1.9969	2.05088	2.04689	1.99575	2.01366
1.43295	1.4553	1.41718	1.40289	1.35521	1.42013	1.44599	1.41095	1.45886	1.29683	1.16672	1.29707	1.31672	1.44712	1.55401	1.53846	1.64738	1.79934	1.89612	1.94119	1.84346	1.90898	1.87544	1.908	1.92098	2.04647	2.06768	2.08489	2.19535	2.15467	2.26013	2.28824	2.28715	2.32022	2.17172	2.07189	2.1291	2.1937	2.2584	2.20573	1.95687	1.91994	1.96319	2.04259	2.05541	2.05748	2.1131	2.10898	2.0563	2.07475
1.47521	1.49822	1.45898	1.44426	1.39518	1.46202	1.48864	1.45257	1.50189	1.33508	1.20113	1.33532	1.35555	1.4898	1.59985	1.58384	1.69596	1.85241	1.95205	1.99845	1.89783	1.96528	1.93075	1.96427	1.97764	2.10683	2.12867	2.14638	2.2601	2.21822	2.32679	2.35573	2.35461	2.38865	2.23577	2.133	2.1919	2.2584	2.325	2.27079	2.01459	1.97657	2.02109	2.10283	2.11603	2.11817	2.17542	2.17118	2.11695	2.13594
1.44081	1.46328	1.42496	1.41058	1.36265	1.42792	1.45392	1.4187	1.46687	1.30395	1.17312	1.30418	1.32394	1.45506	1.56254	1.5469	1.65641	1.80921	1.90653	1.95185	1.85358	1.91946	1.88573	1.91847	1.93152	2.0577	2.07903	2.09633	2.2074	2.16649	2.27253	2.3008	2.2997	2.33295	2.18363	2.08326	2.14079	2.20573	2.27079	2.21784	1.96761	1.93048	1.97396	2.0538	2.06669	2.06877	2.12469	2.12055	2.06758	2.08613
1.27826	1.29819	1.26419	1.25144	1.20891	1.26682	1.28989	1.25863	1.30137	1.15683	1.04077	1.15704	1.17457	1.29089	1.38625	1.37237	1.46953	1.60509	1.69143	1.73163	1.64445	1.7029	1.67297	1.70202	1.7136	1.82554	1.84446	1.85981	1.95835	1.92206	2.01613	2.04121	2.04024	2.06974	1.93727	1.84822	1.89926	1.95687	2.01459	1.96761	1.74562	1.71267	1.75125	1.82208	1.83352	1.83537	1.88498	1.88131	1.83431	1.85077
1.25413	1.27369	1.24033	1.22782	1.18609	1.24291	1.26554	1.23488	1.27681	1.135	1.02112	1.13521	1.1524	1.26653	1.36009	1.34648	1.4418	1.5748	1.65951	1.69895	1.61341	1.67076	1.6414	1.6699	1.68126	1.79109	1.80966	1.82472	1.92139	1.88579	1.97808	2.00269	2.00174	2.03068	1.90071	1.81334	1.86341	1.91994	1.97657	1.93048	1.71267	1.68035	1.7182	1.78769	1.79891	1.80073	1.8494	1.8458	1.79969	1.81584
1.28238	1.30238	1.26827	1.25548	1.21281	1.27091	1.29405	1.2627	1.30557	1.16057	1.04413	1.16078	1.17836	1.29506	1.39072	1.37681	1.47428	1.61027	1.69689	1.73722	1.64976	1.70839	1.67838	1.70751	1.71913	1.83143	1.85042	1.86582	1.96468	1.92827	2.02264	2.0478	2.04683	2.07642	1.94352	1.85418	1.90539	1.96319	2.02109	1.97396	1.75125	1.7182	1.75691	1.82796	1.83944	1.84129	1.89106	1.88738	1.84023	1.85674
1.33425	1.35505	1.31956	1.30625	1.26186	1.32231	1.34639	1.31376	1.35837	1.2075	1.08635	1.20772	1.22602	1.34744	1.44697	1.43249	1.5339	1.6754	1.76551	1.80748	1.71648	1.77749	1.74625	1.77657	1.78866	1.9055	1.92525	1.94128	2.04413	2.00625	2.10444	2.13062	2.12961	2.1604	2.02212	1.92917	1.98245	2.04259	2.10283	2.0538	1.82208	1.78769	1.82796	1.90189	1.91383	1.91576	1.96754	1.96371	1.91466	1.93183
1.34262	1.36356	1.32784	1.31445	1.26978	1.33061	1.35484	1.32201	1.3669	1.21508	1.09317	1.2153	1.23371	1.35589	1.45605	1.44148	1.54353	1.68591	1.7766	1.81882	1.72725	1.78864	1.75721	1.78772	1.79989	1.91746	1.93734	1.95346	2.05696	2.01884	2.11765	2.144	2.14297	2.17396	2.03481	1.94128	1.99489	2.05541	2.11603	2.06669	1.83352	1.79891	1.83944	1.91383	1.92584	1.92778	1.97989	1.97604	1.92667	1.94396
1.34398	1.36493	1.32919	1.31578	1.27106	1.33195	1.35621	1.32334	1.36828	1.21631	1.09428	1.21653	1.23496	1.35726	1.45752	1.44293	1.54509	1.68761	1.77839	1.82066	1.729	1.79045	1.75899	1.78953	1.8017	1.9194	1.9393	1.95544	2.05904	2.02088	2.11979	2.14616	2.14514	2.17615	2.03687	1.94324	1.9969	2.05748	2.11817	2.06877	1.83537	1.80073	1.84129	1.91576	1.92778	1.92973	1.98189	1.97803	1.92862	1.94592
1.3803	1.40183	1.36511	1.35134	1.30542	1.36795	1.39286	1.35911	1.40526	1.24918	1.12385	1.24941	1.26834	1.39395	1.49692	1.48194	1.58685	1.73323	1.82646	1.86987	1.77573	1.83884	1.80653	1.8379	1.8504	1.97128	1.99171	2.00829	2.11469	2.07551	2.17709	2.20417	2.20312	2.23497	2.09193	1.99577	2.05088	2.1131	2.17542	2.12469	1.88498	1.8494	1.89106	1.96754	1.97989	1.98189	2.03546	2.0315	1.98075	1.99852
1.37762	1.3991	1.36245	1.34871	1.30288	1.36529	1.39015	1.35647	1.40253	1.24675	1.12167	1.24698	1.26587	1.39124	1.494	1.47905	1.58376	1.72985	1.8229	1.86623	1.77227	1.83526	1.80301	1.83432	1.8468	1.96744	1.98783	2.00438	2.11058	2.07147	2.17285	2.19988	2.19883	2.23062	2.08785	1.99188	2.04689	2.10898	2.17118	2.12055	1.88131	1.8458	1.88738	1.96371	1.97604	1.97803	2.0315	2.02754	1.97689	1.99463
1.3432	1.36415	1.32842	1.31502	1.27033	1.33119	1.35542	1.32258	1.36749	1.21561	1.09365	1.21583	1.23425	1.35648	1.45668	1.4421	1.5442	1.68664	1.77737	1.81961	1.728	1.78942	1.75798	1.7885	1.80067	1.91829	1.93818	1.95431	2.05785	2.01972	2.11857	2.14493	2.1439	2.1749	2.0357	1.94212	1.99575	2.0563	2.11695	2.06758	1.83431	1.79969	1.84023	1.91466	1.92667	1.92862	1.98075	1.97689	1.92751	1.9448
1.35525	1.37638	1.34034	1.32682	1.28173	1.34313	1.36758	1.33445	1.37976	1.22651	1.10346	1.22674	1.24532	1.36865	1.46975	1.45504	1.55805	1.70177	1.79331	1.83594	1.7435	1.80547	1.77375	1.80454	1.81682	1.9355	1.95557	1.97184	2.07631	2.03784	2.13758	2.16417	2.16313	2.19441	2.05396	1.95954	2.01366	2.07475	2.13594	2.08613	1.85077	1.81584	1.85674	1.93183	1.94396	1.94592	1.99852	1.99463	1.9448	1.96225
1.34672	1.36772	1.3319	1.31847	1.27366	1.33468	1.35898	1.32605	1.37108	1.21879	1.09651	1.21902	1.23748	1.36004	1.4605	1.44588	1.54824	1.69106	1.78203	1.82438	1.73253	1.79411	1.76258	1.79318	1.80539	1.92332	1.94326	1.95943	2.06325	2.02501	2.12412	2.15055	2.14952	2.1806	2.04103	1.94721	2.00099	2.06169	2.1225	2.073	1.83912	1.80441	1.84506	1.91968	1.93172	1.93368	1.98594	1.98208	1.93256	1.9499
1.38394	1.40552	1.36871	1.35491	1.30886	1.37156	1.39654	1.3627	1.40897	1.25248	1.12682	1.25271	1.27168	1.39763	1.50086	1.48584	1.59103	1.7378	1.83128	1.8748	1.78041	1.84369	1.8113	1.84274	1.85528	1.97648	1.99697	2.01359	2.12027	2.08098	2.18283	2.20998	2.20893	2.24087	2.09744	2.00103	2.05629	2.11867	2.18116	2.1303	1.88995	1.85428	1.89605	1.97273	1.98511	1.98712	2.04083	2.03685	1.98597	2.00379
1.39731	1.4191	1.38194	1.368	1.32151	1.38481	1.41003	1.37586	1.42258	1.26458	1.1377	1.26481	1.28397	1.41113	1.51536	1.5002	1.6064	1.75459	1.84897	1.89292	1.79761	1.8615	1.8288	1.86055	1.87321	1.99557	2.01626	2.03304	2.14075	2.10108	2.20392	2.23133	2.23027	2.26252	2.11771	2.02036	2.07615	2.13914	2.20223	2.15088	1.90821	1.87219	1.91437	1.99179	2.00429	2.00631	2.06054	2.05653	2.00516	2.02315
1.34601	1.367	1.3312	1.31777	1.27299	1.33397	1.35826	1.32535	1.37035	1.21815	1.09593	1.21837	1.23683	1.35932	1.45973	1.44512	1.54742	1.69017	1.78108	1.82342	1.73161	1.79316	1.76165	1.79223	1.80443	1.9223	1.94223	1.95839	2.06215	2.02394	2.123	2.14941	2.14838	2.17945	2.03995	1.94618	1.99993	2.0606	2.12137	2.0719	1.83814	1.80346	1.84408	1.91866	1.9307	1.93265	1.98489	1.98102	1.93154	1.94887
1.36894	1.39029	1.35388	1.34022	1.29468	1.3567	1.3814	1.34793	1.3937	1.2389	1.1146	1.23913	1.2579	1.38248	1.4846	1.46974	1.57379	1.71896	1.81143	1.85449	1.76112	1.82371	1.79167	1.82277	1.83517	1.95506	1.97532	1.99176	2.09729	2.05843	2.15917	2.18603	2.18499	2.21658	2.07471	1.97934	2.034	2.09571	2.15752	2.10721	1.86946	1.83418	1.8755	1.95135	1.9636	1.96558	2.01871	2.01478	1.96445	1.98207
1.33106	1.35181	1.31641	1.30313	1.25885	1.31915	1.34317	1.31062	1.35513	1.20462	1.08376	1.20484	1.22309	1.34422	1.44351	1.42906	1.53023	1.67139	1.7613	1.80316	1.71238	1.77324	1.74208	1.77233	1.78439	1.90095	1.92065	1.93664	2.03925	2.00146	2.09941	2.12553	2.12452	2.15524	2.01729	1.92456	1.97771	2.03771	2.09781	2.04889	1.81773	1.78342	1.8236	1.89735	1.90925	1.91118	1.96284	1.95902	1.91008	1.92722
1.28715	1.30722	1.27299	1.26015	1.21732	1.27564	1.29887	1.26739	1.31043	1.16488	1.04801	1.1651	1.18275	1.29988	1.3959	1.38193	1.47976	1.61626	1.7032	1.74368	1.6559	1.71475	1.68462	1.71387	1.72553	1.83825	1.8573	1.87276	1.97198	1.93544	2.03017	2.05542	2.05444	2.08415	1.95075	1.86108	1.91248	1.97049	2.02861	1.98131	1.75777	1.7246	1.76344	1.83476	1.84628	1.84814	1.8981	1.8944	1.84708	1.86365
1.46887	1.49178	1.45271	1.43806	1.38919	1.45573	1.48224	1.44633	1.49544	1.32934	1.19597	1.32958	1.34973	1.4834	1.59297	1.57703	1.68867	1.84445	1.94366	1.98986	1.88968	1.95684	1.92245	1.95583	1.96914	2.09777	2.11952	2.13716	2.25039	2.20869	2.31679	2.34561	2.34449	2.37839	2.22616	2.12383	2.18248	2.24869	2.31501	2.26103	2.00593	1.96808	2.01241	2.09379	2.10694	2.10906	2.16607	2.16185	2.10785	2.12676
1.41042	1.43241	1.3949	1.38083	1.33391	1.3978	1.42326	1.38877	1.43593	1.27644	1.14838	1.27667	1.29601	1.42437	1.52958	1.51427	1.62147	1.77105	1.86631	1.91067	1.81448	1.87897	1.84595	1.878	1.89078	2.01429	2.03517	2.05211	2.16084	2.1208	2.22459	2.25227	2.25119	2.28374	2.13757	2.03931	2.09563	2.15921	2.22289	2.17105	1.92611	1.88976	1.93233	2.01047	2.02309	2.02514	2.07988	2.07582	2.02397	2.04213
1.35241	1.3735	1.33753	1.32403	1.27904	1.34031	1.36472	1.33165	1.37687	1.22394	1.10114	1.22416	1.24271	1.36578	1.46667	1.45199	1.55478	1.6982	1.78955	1.83209	1.73985	1.80168	1.77003	1.80076	1.81301	1.93144	1.95146	1.96771	2.07196	2.03356	2.13309	2.15963	2.1586	2.18981	2.04965	1.95543	2.00943	2.0704	2.13146	2.08176	1.84688	1.81203	1.85285	1.92778	1.93988	1.94184	1.99433	1.99044	1.94072	1.95813
1.28318	1.30319	1.26906	1.25626	1.21357	1.2717	1.29486	1.26348	1.30639	1.16129	1.04478	1.1615	1.17909	1.29587	1.39159	1.37766	1.47519	1.61127	1.69794	1.7383	1.65078	1.70946	1.67942	1.70858	1.7202	1.83257	1.85157	1.86698	1.9659	1.92947	2.0239	2.04908	2.0481	2.07771	1.94473	1.85534	1.90657	1.96441	2.02235	1.97519	1.75234	1.71927	1.758	1.8291	1.84058	1.84244	1.89224	1.88855	1.84138	1.8579
1.33425	1.35505	1.31956	1.30625	1.26186	1.32231	1.34639	1.31376	1.35837	1.2075	1.08635	1.20772	1.22602	1.34744	1.44697	1.43249	1.5339	1.6754	1.76551	1.80748	1.71648	1.77749	1.74625	1.77657	1.78866	1.9055	1.92525	1.94128	2.04413	2.00625	2.10444	2.13062	2.12961	2.1604	2.02212	1.92917	1.98245	2.04259	2.10283	2.0538	1.82208	1.78769	1.82796	1.90189	1.91383	1.91576	1.96754	1.96371	1.91466	1.93183
1.18062	1.19903	1.16763	1.15585	1.11657	1.17006	1.19136	1.1625	1.20197	1.06847	0.961271	1.06867	1.08485	1.19229	1.28036	1.26755	1.35729	1.48249	1.56223	1.59937	1.51884	1.57283	1.54519	1.57202	1.58271	1.6861	1.70358	1.71776	1.80877	1.77525	1.86214	1.8853	1.8844	1.91165	1.7893	1.70705	1.75419	1.80741	1.86071	1.81732	1.61229	1.58186	1.61749	1.68291	1.69347	1.69518	1.741	1.73761	1.6942	1.7094
1.07417	1.09092	1.06235	1.05164	1.0159	1.06456	1.08395	1.05768	1.0936	0.972133	0.874599	0.972311	0.98704	1.08479	1.16492	1.15326	1.23491	1.34882	1.42138	1.45516	1.3819	1.43101	1.40587	1.43028	1.44001	1.53408	1.54998	1.56288	1.64569	1.61519	1.69424	1.71532	1.7145	1.73929	1.62797	1.55313	1.59602	1.64444	1.69294	1.65347	1.46692	1.43923	1.47165	1.53117	1.54078	1.54234	1.58403	1.58094	1.54145	1.55528
1.06324	1.07982	1.05154	1.04093	1.00556	1.05373	1.07292	1.04692	1.08247	0.96224	0.865699	0.962416	0.976995	1.07375	1.15307	1.14153	1.22234	1.3351	1.40691	1.44035	1.36784	1.41645	1.39156	1.41572	1.42536	1.51847	1.53421	1.54698	1.62894	1.59875	1.677	1.69786	1.69705	1.72159	1.6114	1.53733	1.57978	1.62771	1.67572	1.63664	1.45199	1.42459	1.45668	1.51559	1.5251	1.52664	1.56791	1.56485	1.52576	1.53945
1.03676	1.05293	1.02535	1.01501	0.980517	1.02749	1.0462	1.02085	1.05551	0.938277	0.84414	0.938448	0.952665	1.04701	1.12435	1.1131	1.1919	1.30185	1.37188	1.40448	1.33377	1.38118	1.35691	1.38047	1.38986	1.48065	1.496	1.50845	1.58837	1.55894	1.63524	1.65558	1.65479	1.67871	1.57127	1.49904	1.54044	1.58717	1.63398	1.59588	1.41583	1.38911	1.4204	1.47784	1.48712	1.48862	1.52886	1.52588	1.48777	1.50111
0.994237	1.00974	0.983296	0.973377	0.940299	0.985342	1.00328	0.978975	1.01222	0.899792	0.809516	0.899956	0.913589	1.00407	1.07823	1.06744	1.14301	1.24845	1.31561	1.34688	1.27907	1.32453	1.30125	1.32384	1.33285	1.41992	1.43464	1.44658	1.52322	1.49499	1.56816	1.58767	1.58691	1.60986	1.50682	1.43756	1.47726	1.52207	1.56696	1.53042	1.35776	1.33213	1.36214	1.41723	1.42612	1.42756	1.46615	1.46329	1.42674	1.43954
0.974837	0.990037	0.964108	0.954383	0.921951	0.966115	0.983707	0.959871	0.992465	0.882234	0.793719	0.882395	0.895762	0.984475	1.05719	1.04661	1.12071	1.22409	1.28993	1.32059	1.25411	1.29868	1.27586	1.29801	1.30684	1.39221	1.40664	1.41835	1.4935	1.46582	1.53756	1.55669	1.55595	1.57844	1.47742	1.40951	1.44843	1.49237	1.53639	1.50056	1.33126	1.30614	1.33556	1.38957	1.39829	1.39971	1.43754	1.43474	1.3989	1.41145
0.91981	0.934152	0.909687	0.900511	0.869909	0.911581	0.928179	0.90569	0.936443	0.832434	0.748916	0.832586	0.845199	0.928904	0.997519	0.987536	1.05745	1.15499	1.21712	1.24605	1.18332	1.22537	1.20384	1.22474	1.23308	1.31363	1.32724	1.33829	1.40919	1.38308	1.45077	1.46882	1.46812	1.48935	1.39402	1.32994	1.36667	1.40813	1.44966	1.41586	1.25612	1.23241	1.26017	1.31114	1.31936	1.3207	1.3564	1.35375	1.31994	1.33178
0.9146	0.928861	0.904535	0.895411	0.864982	0.906417	0.922922	0.90056	0.931139	0.827719	0.744674	0.82787	0.840411	0.923642	0.991868	0.981943	1.05146	1.14845	1.21023	1.23899	1.17661	1.21843	1.19702	1.2178	1.22609	1.30618	1.31973	1.33071	1.40121	1.37525	1.44256	1.4605	1.4598	1.48091	1.38613	1.32241	1.35893	1.40015	1.44145	1.40784	1.249	1.22543	1.25303	1.30371	1.31189	1.31322	1.34871	1.34609	1.31246	1.32423
0.921249	0.935614	0.911111	0.90192	0.871271	0.913007	0.929632	0.907107	0.937909	0.833737	0.750088	0.833889	0.846521	0.930358	0.99908	0.989082	1.0591	1.1568	1.21903	1.248	1.18517	1.22729	1.20573	1.22666	1.23501	1.31568	1.32932	1.34038	1.4114	1.38525	1.45304	1.47112	1.47042	1.49168	1.3962	1.33202	1.36881	1.41033	1.45193	1.41807	1.25808	1.23434	1.26214	1.31319	1.32143	1.32276	1.35852	1.35587	1.322	1.33386
0.945765	0.960512	0.935357	0.925922	0.894456	0.937304	0.954371	0.931246	0.962868	0.855924	0.770049	0.85608	0.869049	0.955116	1.02567	1.0154	1.08729	1.18758	1.25147	1.28121	1.21671	1.25995	1.23781	1.2593	1.26787	1.35069	1.36469	1.37605	1.44896	1.42211	1.49171	1.51027	1.50955	1.53137	1.43336	1.36747	1.40523	1.44787	1.49057	1.45581	1.29156	1.26719	1.29573	1.34813	1.35659	1.35796	1.39467	1.39195	1.35718	1.36936
0.90374	0.917832	0.893794	0.884778	0.854711	0.895654	0.911963	0.889866	0.920083	0.817891	0.735832	0.81804	0.830432	0.912675	0.980091	0.970283	1.03897	1.13481	1.19586	1.22428	1.16264	1.20396	1.18281	1.20334	1.21153	1.29067	1.30405	1.31491	1.38457	1.35892	1.42543	1.44316	1.44247	1.46333	1.36967	1.30671	1.34279	1.38353	1.42433	1.39112	1.23417	1.21088	1.23815	1.28823	1.29631	1.29762	1.3327	1.3301	1.29688	1.30851
0.970495	0.985628	0.959814	0.950133	0.917845	0.961812	0.979325	0.955596	0.988045	0.878305	0.790184	0.878465	0.891772	0.98009	1.05249	1.04195	1.11572	1.21864	1.28419	1.31471	1.24852	1.2929	1.27018	1.29223	1.30102	1.38601	1.40038	1.41203	1.48685	1.45929	1.53072	1.54976	1.54902	1.57141	1.47084	1.40323	1.44198	1.48572	1.52954	1.49388	1.32533	1.30032	1.32961	1.38338	1.39207	1.39347	1.43114	1.42835	1.39267	1.40516
0.891333	0.905232	0.881524	0.872632	0.842978	0.883359	0.899443	0.87765	0.907452	0.806663	0.72573	0.80681	0.819032	0.900146	0.966636	0.956963	1.02471	1.11924	1.17944	1.20747	1.14668	1.18744	1.16657	1.18682	1.1949	1.27296	1.28615	1.29686	1.36557	1.34026	1.40586	1.42335	1.42267	1.44324	1.35086	1.28877	1.32436	1.36454	1.40478	1.37202	1.21723	1.19426	1.22116	1.27054	1.27852	1.27981	1.3144	1.31184	1.27907	1.29055
0.889763	0.903637	0.879971	0.871095	0.841493	0.881803	0.897859	0.876104	0.905853	0.805242	0.724452	0.805389	0.817589	0.89856	0.964933	0.955277	1.02291	1.11726	1.17736	1.20535	1.14466	1.18534	1.16452	1.18473	1.1928	1.27071	1.28389	1.29457	1.36316	1.3379	1.40338	1.42084	1.42016	1.44069	1.34848	1.2865	1.32203	1.36213	1.40231	1.36961	1.21508	1.19215	1.21901	1.26831	1.27627	1.27755	1.31209	1.30953	1.27682	1.28827
0.756622	0.768419	0.748295	0.740747	0.715574	0.749852	0.763506	0.745006	0.770304	0.684748	0.616047	0.684873	0.695248	0.764102	0.820543	0.812332	0.869841	0.95008	1.00118	1.02498	0.973377	1.00797	0.990262	1.00745	1.01431	1.08057	1.09177	1.10086	1.15918	1.1377	1.19338	1.20823	1.20765	1.22511	1.1467	1.09399	1.1242	1.15831	1.19247	1.16466	1.03326	1.01376	1.0366	1.07852	1.08529	1.08639	1.11575	1.11358	1.08576	1.0955
0.766804	0.77876	0.758365	0.750715	0.725204	0.759943	0.773781	0.755032	0.78067	0.693963	0.624337	0.694089	0.704604	0.774385	0.831586	0.823264	0.881547	0.962865	1.01466	1.03878	0.986477	1.02154	1.00359	1.02101	1.02796	1.09511	1.10646	1.11567	1.17478	1.15301	1.20944	1.22449	1.2239	1.2416	1.16213	1.10871	1.13933	1.17389	1.20852	1.18034	1.04717	1.0274	1.05055	1.09303	1.09989	1.101	1.13077	1.12856	1.10037	1.11024
0.663126	0.673466	0.655828	0.649213	0.627151	0.657194	0.66916	0.652946	0.675118	0.600134	0.539922	0.600243	0.609336	0.669683	0.719149	0.711953	0.762355	0.832679	0.877469	0.898326	0.853098	0.883418	0.867896	0.882963	0.888972	0.947043	0.95686	0.964824	1.01594	0.997116	1.04592	1.05893	1.05842	1.07373	1.005	0.958807	0.985285	1.01518	1.04512	1.02075	0.905582	0.888491	0.908506	0.945248	0.95118	0.952141	0.977877	0.975973	0.951593	0.96013
0.633912	0.643796	0.626936	0.620612	0.599522	0.628241	0.63968	0.624181	0.645375	0.573695	0.516136	0.5738	0.582492	0.640179	0.687467	0.680587	0.728769	0.795995	0.838812	0.85875	0.815514	0.844499	0.82966	0.844064	0.849808	0.90532	0.914705	0.922318	0.971185	0.953188	0.999839	1.01228	1.01179	1.02642	0.960728	0.916566	0.941878	0.970452	0.999074	0.975777	0.865686	0.849349	0.868481	0.903605	0.909276	0.910194	0.934797	0.932976	0.909671	0.917831
0.569881	0.578767	0.563609	0.557924	0.538964	0.564782	0.575066	0.561132	0.580186	0.515746	0.464001	0.51584	0.523655	0.575515	0.618026	0.611842	0.655157	0.715592	0.754084	0.772008	0.73314	0.759197	0.745857	0.758806	0.763969	0.813874	0.822311	0.829155	0.873086	0.856907	0.898846	0.910028	0.909593	0.922745	0.863686	0.823984	0.846739	0.872427	0.898158	0.877214	0.778243	0.763556	0.780756	0.812332	0.81743	0.818256	0.840373	0.838737	0.817785	0.825121
0.57452	0.583478	0.568197	0.562466	0.543352	0.56938	0.579747	0.5657	0.584909	0.519945	0.467779	0.520039	0.527917	0.5802	0.623057	0.616822	0.66049	0.721417	0.760222	0.778292	0.739108	0.765377	0.751928	0.764983	0.770188	0.8205	0.829005	0.835905	0.880193	0.863883	0.906163	0.917436	0.916998	0.930256	0.870716	0.830692	0.853632	0.879529	0.905469	0.884355	0.784579	0.769772	0.787112	0.818945	0.824085	0.824917	0.847214	0.845564	0.824442	0.831838
0.484926	0.492488	0.47959	0.474752	0.458619	0.480588	0.489339	0.477482	0.493695	0.438862	0.394831	0.438942	0.445591	0.489721	0.525894	0.520632	0.55749	0.608916	0.641669	0.656921	0.623847	0.64602	0.634669	0.645687	0.650081	0.692547	0.699726	0.70555	0.742931	0.729164	0.764851	0.774366	0.773996	0.785187	0.734932	0.70115	0.720512	0.74237	0.764266	0.746444	0.662227	0.64973	0.664366	0.691234	0.695572	0.696275	0.715095	0.713703	0.695874	0.702117
0.437096	0.443912	0.432286	0.427925	0.413383	0.433186	0.441073	0.430386	0.445	0.395575	0.355887	0.395647	0.401641	0.441418	0.474024	0.46928	0.502502	0.548856	0.578379	0.592127	0.562315	0.582301	0.572069	0.582001	0.585961	0.624238	0.630709	0.635959	0.669653	0.657244	0.689411	0.697987	0.697654	0.707741	0.662443	0.631993	0.649445	0.669148	0.688883	0.672819	0.596909	0.585644	0.598837	0.623055	0.626966	0.627599	0.644563	0.643307	0.627238	0.632865
0.339271	0.344561	0.335537	0.332153	0.320865	0.336236	0.342358	0.334063	0.345406	0.307043	0.276237	0.307099	0.311751	0.342625	0.367934	0.364252	0.390039	0.426018	0.448934	0.459605	0.436465	0.451978	0.444036	0.451745	0.454819	0.48453	0.489552	0.493627	0.51978	0.510148	0.535116	0.541773	0.541515	0.549344	0.514184	0.490548	0.504095	0.519388	0.534707	0.522238	0.463317	0.454573	0.464813	0.483611	0.486646	0.487138	0.500305	0.499331	0.486858	0.491225
0.336345	0.34159	0.332643	0.329288	0.318098	0.333336	0.339405	0.331182	0.342427	0.304395	0.273855	0.30445	0.309062	0.33967	0.364761	0.36111	0.386675	0.422344	0.445062	0.455641	0.432701	0.44808	0.440206	0.447849	0.450896	0.480351	0.48533	0.489369	0.515297	0.505748	0.530501	0.5371	0.536844	0.544606	0.509749	0.486317	0.499747	0.514908	0.530095	0.517734	0.459321	0.450653	0.460804	0.47944	0.482449	0.482936	0.49599	0.495024	0.482659	0.486989
0.27587	0.280172	0.272834	0.270082	0.260904	0.273402	0.278381	0.271635	0.280859	0.249665	0.224616	0.24971	0.253493	0.278598	0.299177	0.296183	0.317151	0.346407	0.36504	0.373717	0.354901	0.367515	0.361058	0.367326	0.369826	0.393984	0.398068	0.401381	0.422647	0.414815	0.435117	0.44053	0.44032	0.446686	0.418097	0.398878	0.409893	0.422328	0.434784	0.424646	0.376735	0.369626	0.377952	0.393237	0.395705	0.396105	0.406812	0.406019	0.395877	0.399428
0.215241	0.218597	0.212872	0.210725	0.203564	0.213316	0.2172	0.211937	0.219134	0.194795	0.175251	0.19483	0.197782	0.217369	0.233426	0.23109	0.24745	0.270276	0.284814	0.291584	0.276903	0.286745	0.281706	0.286597	0.288547	0.307396	0.310583	0.313168	0.32976	0.32365	0.33949	0.343713	0.343549	0.348516	0.32621	0.311215	0.319809	0.329511	0.33923	0.331319	0.293939	0.288392	0.294888	0.306814	0.30874	0.309051	0.317405	0.316787	0.308874	0.311644
0.157098	0.159548	0.155369	0.153802	0.148575	0.155693	0.158528	0.154686	0.159939	0.142175	0.127911	0.142201	0.144355	0.158651	0.17037	0.168665	0.180606	0.197266	0.207877	0.212818	0.202103	0.209287	0.205609	0.209179	0.210602	0.22436	0.226685	0.228572	0.240682	0.236222	0.247783	0.250866	0.250746	0.254372	0.238091	0.227147	0.233419	0.240501	0.247594	0.24182	0.214537	0.210488	0.21523	0.223934	0.22534	0.225567	0.231664	0.231213	0.225438	0.22746
0.0755813	0.0767598	0.0747495	0.0739955	0.0714809	0.0749051	0.076269	0.074421	0.076948	0.0684016	0.0615388	0.0684141	0.0694504	0.0763285	0.0819666	0.0811464	0.0868911	0.0949064	0.100011	0.102389	0.0972337	0.10069	0.0989203	0.100638	0.101323	0.107941	0.10906	0.109968	0.115794	0.113649	0.119211	0.120694	0.120636	0.12238	0.114548	0.109282	0.1123	0.115707	0.119119	0.116342	0.103216	0.101268	0.103549	0.107737	0.108413	0.108522	0.111456	0.111239	0.10846	0.109433
0.0374933	0.0380779	0.0370806	0.0367066	0.0354592	0.0371578	0.0378344	0.0369177	0.0381713	0.0339317	0.0305273	0.0339379	0.034452	0.0378639	0.0406608	0.0402539	0.0431037	0.0470798	0.0496122	0.0507915	0.0482343	0.0499486	0.0490709	0.0499229	0.0502626	0.0535459	0.054101	0.0545513	0.0574415	0.0563771	0.0591363	0.059872	0.0598434	0.0607087	0.0568231	0.0542111	0.0557081	0.0573982	0.0590911	0.0577131	0.0512017	0.0502354	0.051367	0.0534444	0.0537799	0.0538342	0.0552893	0.0551816	0.0538032	0.0542859
0.0343411	0.0348765	0.0339631	0.0336206	0.032478	0.0340338	0.0346535	0.0338139	0.0349621	0.0310789	0.0279608	0.0310846	0.0315555	0.0346806	0.0372423	0.0368696	0.0394798	0.0431216	0.0454411	0.0465213	0.044179	0.0457492	0.0449454	0.0457257	0.0460368	0.0490441	0.0495526	0.049965	0.0526122	0.0516373	0.0541645	0.0548383	0.0548122	0.0556047	0.0520458	0.0496534	0.0510246	0.0525725	0.0541231	0.052861	0.046897	0.046012	0.0470484	0.0489512	0.0492584	0.0493082	0.050641	0.0505423	0.0492798	0.0497219
0.0458555	0.0465705	0.0453508	0.0448934	0.0433678	0.0454452	0.0462727	0.0451515	0.0466847	0.0414995	0.0373359	0.0415071	0.0421359	0.0463089	0.0497295	0.0492319	0.0527172	0.0575801	0.0606774	0.0621196	0.0589921	0.0610888	0.0600154	0.0610573	0.0614728	0.0654884	0.0661673	0.066718	0.0702529	0.0689511	0.0723257	0.0732254	0.0731905	0.0742487	0.0694965	0.0663019	0.0681329	0.0701999	0.0722703	0.0705851	0.0626214	0.0614396	0.0628236	0.0653643	0.0657746	0.065841	0.0676207	0.067489	0.0658031	0.0663934
0.0370769	0.0376551	0.0366689	0.036299	0.0350655	0.0367452	0.0374143	0.0365077	0.0377474	0.0335549	0.0301883	0.033561	0.0340694	0.0374435	0.0402093	0.0398069	0.042625	0.046557	0.0490613	0.0502275	0.0476987	0.049394	0.0485261	0.0493685	0.0497045	0.0529514	0.0535003	0.0539455	0.0568037	0.0557511	0.0584797	0.0592072	0.0591789	0.0600346	0.0561921	0.0536091	0.0550896	0.0567608	0.0584349	0.0570723	0.0506332	0.0496776	0.0507967	0.052851	0.0531827	0.0532364	0.0546754	0.0545689	0.0532058	0.0536831
0.0135961	0.0138081	0.0134464	0.0133108	0.0128585	0.0134744	0.0137198	0.0133873	0.0138419	0.0123045	0.01107	0.0123068	0.0124932	0.0137305	0.0147447	0.0145972	0.0156305	0.0170724	0.0179907	0.0184184	0.017491	0.0181127	0.0177944	0.0181034	0.0182266	0.0194172	0.0196185	0.0197818	0.0208298	0.0204439	0.0214444	0.0217112	0.0217008	0.0220146	0.0206056	0.0196584	0.0202013	0.0208141	0.021428	0.0209283	0.0185671	0.0182167	0.0186271	0.0193804	0.019502	0.0195217	0.0200494	0.0200104	0.0195105	0.0196855
0.0212684	0.0216	0.0210343	0.0208221	0.0201146	0.0210781	0.0214619	0.0209419	0.021653	0.019248	0.0173169	0.0192515	0.0195432	0.0214787	0.0230652	0.0228344	0.0244509	0.0267064	0.028143	0.0288119	0.0273613	0.0283338	0.0278359	0.0283192	0.0285119	0.0303744	0.0306893	0.0309447	0.0325842	0.0319804	0.0335456	0.0339629	0.0339467	0.0344375	0.0322334	0.0307517	0.0316009	0.0325596	0.0335199	0.0327383	0.0290446	0.0284965	0.0291384	0.0303168	0.0305071	0.0305379	0.0313634	0.0313023	0.0305204	0.0307942
0.0117761	0.0119597	0.0116465	0.011529	0.0111373	0.0116708	0.0118833	0.0115953	0.0119891	0.0106575	0.00958821	0.0106594	0.0108209	0.0118925	0.012771	0.0126432	0.0135383	0.0147871	0.0155825	0.0159529	0.0151497	0.0156882	0.0154125	0.0156801	0.0157868	0.016818	0.0169924	0.0171338	0.0180416	0.0177073	0.0185739	0.018805	0.018796	0.0190678	0.0178474	0.017027	0.0174972	0.018028	0.0185597	0.0181269	0.0160818	0.0157783	0.0161337	0.0167862	0.0168915	0.0169086	0.0173656	0.0173318	0.0168989	0.0170505
0.00845739	0.00858927	0.00836432	0.00827995	0.00799857	0.00838173	0.00853435	0.00832756	0.00861033	0.007654	0.00688607	0.0076554	0.00777137	0.00854101	0.0091719	0.00908012	0.00972294	0.0106198	0.0111911	0.0114571	0.0108803	0.011267	0.011069	0.0112612	0.0113378	0.0120784	0.0122036	0.0123052	0.0129571	0.012717	0.0133394	0.0135054	0.0134989	0.0136941	0.0128176	0.0122285	0.0125661	0.0129474	0.0133292	0.0130184	0.0115496	0.0113317	0.0115869	0.0120555	0.0121312	0.0121434	0.0124717	0.0124474	0.0121365	0.0122453
0.00521004	0.00529128	0.0051527	0.00510073	0.00492739	0.00516343	0.00525745	0.00513006	0.00530426	0.00471512	0.00424205	0.00471598	0.00478742	0.00526155	0.0056502	0.00559366	0.00598966	0.00654218	0.00689408	0.00705795	0.0067026	0.00694083	0.00681887	0.00693725	0.00698446	0.00744071	0.00751784	0.00758041	0.00798204	0.00783413	0.00821755	0.00831978	0.0083158	0.00843604	0.0078961	0.00753314	0.00774117	0.00797602	0.00821126	0.00801978	0.00711496	0.00698069	0.00713793	0.00742661	0.00747322	0.00748077	0.00768297	0.00766801	0.00747646	0.00754353
0.00279534	0.00283893	0.00276458	0.00273669	0.00264369	0.00277033	0.00282078	0.00275243	0.00284589	0.0025298	0.00227599	0.00253027	0.00256859	0.00282298	0.0030315	0.00300116	0.00321363	0.00351007	0.00369888	0.0037868	0.00359615	0.00372396	0.00365853	0.00372204	0.00374737	0.00399216	0.00403355	0.00406712	0.0042826	0.00420324	0.00440896	0.00446381	0.00446168	0.00452619	0.00423649	0.00404175	0.00415337	0.00427937	0.00440558	0.00430285	0.00381739	0.00374535	0.00382971	0.0039846	0.0040096	0.00401365	0.00412214	0.00411411	0.00401134	0.00404733
[truncated: 50 more columns]

## Sheet: Switzerland
Household
2.84824	2.80898	2.78602	2.91662	2.80767	1.90968	1.92903	1.88976	2.0142	2.0662	1.34159	1.3619	1.36568	1.40199	1.40338	0.77733	0.733212	0.767542	0.734319	0.725183	2.24083	2.30739	2.31457	2.46503	2.4238	2.67461	2.59857	2.71149	2.81136	2.71773	3.13054	3.15795	3.10421	3.23821	3.31062	3.49487	3.61828	3.57921	3.7209	3.77648	3.37159	3.48122	3.53737	3.58844	3.57646	0	0	0	0	0
2.80898	2.73947	2.78296	2.78787	2.80066	1.92582	1.91944	1.91416	2.00674	1.96449	1.29773	1.35282	1.34783	1.32933	1.42997	0.729609	0.729921	0.754037	0.727055	0.71721	2.38227	2.33168	2.29037	2.40391	2.37358	2.63006	2.69305	2.69106	2.64709	2.63631	2.99728	3.11446	3.14101	3.24636	3.29723	3.3925	3.63678	3.65622	3.70442	3.81601	3.38183	3.40127	3.50936	3.5871	3.51203	0	0	0	0	0
2.78602	2.78296	2.87315	2.94278	2.76605	1.83821	1.94378	1.92383	1.95286	2.01207	1.30127	1.32502	1.38176	1.35345	1.41924	0.734744	0.718743	0.726261	0.729978	0.744561	2.31063	2.44386	2.38723	2.44267	2.39245	2.60396	2.72369	2.72511	2.69645	2.70724	3.0873	3.16209	3.24724	3.18672	3.24139	3.45234	3.55144	3.56968	3.72096	3.79824	3.30509	3.57002	3.47801	3.6399	3.47722	0	0	0	0	0
2.91662	2.78787	2.94278	2.89982	2.83494	1.91853	1.98174	1.90057	2.08839	2.03826	1.34008	1.38202	1.34374	1.41073	1.40392	0.72819	0.75032	0.75015	0.739057	0.748363	2.3447	2.38729	2.34603	2.44165	2.33843	2.65617	2.66808	2.85278	2.6922	2.78412	3.18507	3.10228	3.188	3.27169	3.39344	3.44853	3.61054	3.62214	3.76689	3.88796	3.45435	3.50383	3.46261	3.63079	3.53938	0	0	0	0	0
2.80767	2.80066	2.76605	2.83494	2.73044	1.90102	1.86953	1.8834	1.96069	2.01539	1.32771	1.38176	1.31376	1.33549	1.37175	0.764762	0.727226	0.75659	0.762208	0.721268	2.29885	2.35928	2.33483	2.37026	2.27735	2.64028	2.57729	2.75036	2.65844	2.6173	3.05737	3.12206	3.13928	3.19662	3.32991	3.47693	3.53115	3.57357	3.74374	3.82965	3.35462	3.43475	3.54355	3.50987	3.51921	0	0	0	0	0
1.90968	1.92582	1.83821	1.91853	1.90102	2.82697	2.92326	2.9636	3.08552	3.06909	2.41617	2.47833	2.51638	2.60609	2.58504	1.43621	1.47099	1.4515	1.45559	1.49851	0.376948	0.38509	0.374848	0.390453	0.380579	1.85001	1.89211	1.83787	1.80777	1.84899	2.89517	2.97748	3.0673	3.08904	3.09338	3.27331	3.32225	3.3849	3.51963	3.55615	3.39837	3.50261	3.51802	3.67764	3.4714	3.21938	3.11378	3.11131	3.00108	2.91852
1.92903	1.91944	1.94378	1.98174	1.86953	2.92326	2.91571	3.01118	3.05323	3.18578	2.39971	2.46034	2.46854	2.52231	2.61591	1.49528	1.44722	1.51707	1.47471	1.47468	0.402539	0.419136	0.37411	0.394623	0.39956	1.84476	1.80209	1.85869	1.87957	1.86479	2.92473	2.95282	3.03121	3.16975	3.26693	3.25385	3.43585	3.45358	3.53975	3.55572	3.51365	3.62614	3.54857	3.67225	3.57706	3.29396	3.1272	3.12884	3.0151	2.91756
1.88976	1.91416	1.92383	1.90057	1.8834	2.9636	3.01118	2.91747	3.08478	3.19137	2.481	2.58975	2.54725	2.57423	2.62555	1.49318	1.49074	1.51579	1.49707	1.50646	0.410568	0.418768	0.390878	0.37238	0.402482	1.7891	1.86397	1.83052	1.89112	1.86911	2.97787	3.09692	3.08126	3.13307	3.15687	3.26233	3.38711	3.40569	3.56205	3.5728	3.48357	3.55856	3.64583	3.65519	3.56631	3.37366	3.23807	3.0753	3.065	2.95881
2.0142	2.00674	1.95286	2.08839	1.96069	3.08552	3.05323	3.08478	3.23921	3.31224	2.52742	2.65801	2.62757	2.73328	2.72443	1.5733	1.52235	1.54657	1.56277	1.57526	0.382622	0.418229	0.410455	0.41803	0.428981	1.88082	1.94721	1.96994	1.96886	2.00617	3.15043	3.13576	3.15543	3.28352	3.30012	3.38589	3.50131	3.5749	3.66887	3.77118	3.63099	3.75745	3.72539	3.85164	3.73049	3.46017	3.37343	3.27271	3.2162	3.10833
2.0662	1.96449	2.01207	2.03826	2.01539	3.06909	3.18578	3.19137	3.31224	3.41784	2.55363	2.65029	2.68113	2.7665	2.75612	1.58942	1.57444	1.59058	1.58706	1.5731	0.434656	0.425889	0.415959	0.434259	0.421037	1.89995	1.95198	2.0142	1.98784	1.94704	3.22397	3.20871	3.29187	3.35959	3.40527	3.50769	3.54795	3.64126	3.78673	3.87065	3.71356	3.768	3.73886	3.90467	3.76919	3.58489	3.42757	3.31258	3.22732	3.18028
1.34159	1.29773	1.30127	1.34008	1.32771	2.41617	2.39971	2.481	2.52742	2.55363	3.28857	3.29558	3.31595	3.38305	3.45906	2.29868	2.41918	2.39449	2.39458	2.3487	0.681888	0.679675	0.692101	0.67749	0.71809	0.129375	0.130652	0.138539	0.128099	0.131986	2.81854	2.83116	2.90073	2.92323	3.11128	3.58273	3.72456	3.79756	3.82483	4.00167	3.64921	3.66461	3.715	3.69125	3.77657	3.75677	3.69579	3.63647	3.48017	3.33232
1.3619	1.35282	1.32502	1.38202	1.38176	2.47833	2.46034	2.58975	2.65801	2.65029	3.29558	3.51816	3.47506	3.50531	3.55428	2.42346	2.45053	2.49533	2.45149	2.45603	0.684526	0.70206	0.702032	0.726772	0.73012	0.131844	0.145916	0.128808	0.13522	0.12929	2.90561	3.00996	3.04983	3.10192	3.23436	3.63956	3.85295	3.91457	3.96791	4.18978	3.74088	3.86271	3.83467	3.96186	3.83289	3.92302	3.83093	3.68635	3.64665	3.45478
1.36568	1.34783	1.38176	1.34374	1.31376	2.51638	2.46854	2.54725	2.62757	2.68113	3.31595	3.47506	3.47503	3.4634	3.49467	2.50316	2.41634	2.449	2.40559	2.43745	0.691619	0.690513	0.723878	0.748731	0.713494	0.14044	0.140072	0.139759	0.140298	0.14603	2.88683	3.00094	3.04117	3.10873	3.21191	3.71338	3.8509	3.9222	3.98442	4.12092	3.6916	3.88254	3.75027	3.87652	3.85828	3.88379	3.72544	3.78105	3.62069	3.45818
1.40199	1.32933	1.35345	1.41073	1.33549	2.60609	2.52231	2.57423	2.73328	2.7665	3.38305	3.50531	3.4634	3.52735	3.6395	2.54441	2.51062	2.48188	2.49658	2.49121	0.719338	0.743171	0.711763	0.774748	0.775741	0.14725	0.150995	0.135475	0.142738	0.137405	3.06322	3.06166	3.08708	3.21807	3.24136	3.75129	3.9289	3.95528	4.05251	4.21732	3.81132	3.86387	3.88489	3.94107	3.93522	3.95066	3.86835	3.77949	3.68479	3.57856
1.40338	1.42997	1.41924	1.40392	1.37175	2.58504	2.61591	2.62555	2.72443	2.75612	3.45906	3.55428	3.49467	3.6395	3.61298	2.5353	2.53899	2.50617	2.50055	2.55298	0.735227	0.746206	0.733297	0.744192	0.725353	0.154513	0.138681	0.131617	0.149321	0.144072	3.06974	3.10663	3.07882	3.24698	3.29076	3.72859	3.9361	4.01458	4.1191	4.28598	3.89374	4.00576	3.91332	3.96209	3.90424	4.04318	3.88427	3.81601	3.74508	3.64231
0.77733	0.729609	0.734744	0.72819	0.764762	1.43621	1.49528	1.49318	1.5733	1.58942	2.29868	2.42346	2.50316	2.54441	2.5353	3.65763	3.61451	3.57624	3.55975	3.54349	1.69924	1.6614	1.69221	1.66923	1.73613	0.776082	0.823718	0.822101	0.9115	0.915728	0.551548	0.460729	0.568883	0.518778	0.527715	3.79132	3.99841	4.06179	4.18473	4.27387	4.32814	4.50541	4.30797	4.56633	4.42807	4.10429	3.94731	3.86926	3.75135	3.71651
0.733212	0.729921	0.718743	0.75032	0.727226	1.47099	1.44722	1.49074	1.52235	1.57444	2.41918	2.45053	2.41634	2.51062	2.53899	3.61451	3.66291	3.56492	3.60577	3.59825	1.7077	1.65898	1.64965	1.70846	1.70841	0.838954	0.843295	0.81864	0.86917	0.891498	0.507798	0.475568	0.499485	0.51055	0.587438	3.81169	4.08863	3.9933	4.26346	4.34313	4.28425	4.41774	4.44532	4.4353	4.38835	4.16055	4.10503	3.9205	3.8288	3.76091
0.767542	0.754037	0.726261	0.75015	0.75659	1.4515	1.51707	1.51579	1.54657	1.59058	2.39449	2.49533	2.449	2.48188	2.50617	3.57624	3.56492	3.65173	3.63562	3.60313	1.61342	1.63356	1.79449	1.68619	1.74949	0.788055	0.869368	0.82786	0.890307	0.806837	0.492931	0.512877	0.549193	0.523346	0.553307	3.86313	4.0772	4.06468	4.18353	4.30423	4.39998	4.5329	4.4159	4.61552	4.45812	4.15057	3.98706	3.86341	3.79813	3.72105
0.734319	0.727055	0.729978	0.739057	0.762208	1.45559	1.47471	1.49707	1.56277	1.58706	2.39458	2.45149	2.40559	2.49658	2.50055	3.55975	3.60577	3.63562	3.59726	3.59785	1.65073	1.70855	1.59566	1.68699	1.67989	0.735766	0.828626	0.843238	0.873652	0.825108	0.532141	0.520509	0.532595	0.538071	0.519516	3.90594	4.04831	4.04304	4.22232	4.24567	4.34154	4.45559	4.36543	4.51285	4.37808	4.00508	3.94547	3.92226	3.79441	3.65715
0.725183	0.71721	0.744561	0.748363	0.721268	1.49851	1.47468	1.50646	1.57526	1.5731	2.3487	2.45603	2.43745	2.49121	2.55298	3.54349	3.59825	3.60313	3.59785	3.61309	1.62959	1.69504	1.62741	1.72855	1.63251	0.816881	0.850983	0.872461	0.833421	0.947788	0.505443	0.476391	0.534042	0.523034	0.504933	3.83606	3.9428	4.01832	4.23279	4.32244	4.38651	4.41885	4.39621	4.49534	4.33615	4.13164	4.05067	3.90827	3.77654	3.61215
2.24083	2.38227	2.31063	2.3447	2.29885	0.376948	0.402539	0.410568	0.382622	0.434656	0.681888	0.684526	0.691619	0.719338	0.735227	1.69924	1.7077	1.61342	1.65073	1.62959	2.89364	2.8399	2.80177	2.89855	2.82237	2.31057	2.32152	2.40845	2.48191	2.3878	1.61109	1.673	1.66279	1.84088	1.76952	1.23778	1.29897	1.26967	1.27622	1.36457	2.5418	2.77601	2.57641	2.67347	2.63106	2.71597	2.66261	2.56844	2.45322	2.43058
2.30739	2.33168	2.44386	2.38729	2.35928	0.38509	0.419136	0.418768	0.418229	0.425889	0.679675	0.70206	0.690513	0.743171	0.746206	1.6614	1.65898	1.63356	1.70855	1.69504	2.8399	2.90499	2.96375	3.07204	2.83965	2.396	2.39271	2.47899	2.57023	2.53868	1.75985	1.70693	1.7256	1.91056	1.84181	1.24731	1.31129	1.3764	1.24666	1.37929	2.60161	2.667	2.60717	2.74557	2.70616	2.85153	2.63798	2.65634	2.53899	2.41796
2.31457	2.29037	2.38723	2.34603	2.33483	0.374848	0.37411	0.390878	0.410455	0.415959	0.692101	0.702032	0.723878	0.711763	0.733297	1.69221	1.64965	1.79449	1.59566	1.62741	2.80177	2.96375	2.98431	2.94093	2.95557	2.33298	2.41807	2.56731	2.53496	2.41228	1.67368	1.81157	1.6896	1.67022	1.79764	1.22631	1.3175	1.37254	1.31353	1.37566	2.57627	2.66195	2.62893	2.70423	2.66817	2.77425	2.63781	2.61157	2.54339	2.47632
2.46503	2.40391	2.44267	2.44165	2.37026	0.390453	0.394623	0.37238	0.41803	0.434259	0.67749	0.726772	0.748731	0.774748	0.744192	1.66923	1.70846	1.68619	1.68699	1.72855	2.89855	3.07204	2.94093	3.15483	3.02701	2.46911	2.51743	2.54858	2.62042	2.43716	1.65771	1.81108	1.83387	1.7912	1.78544	1.23925	1.26581	1.35628	1.34885	1.49548	2.63977	2.74857	2.63018	2.70956	2.78781	2.76999	2.71257	2.64017	2.61682	2.58518
2.4238	2.37358	2.39245	2.33843	2.27735	0.380579	0.39956	0.402482	0.428981	0.421037	0.71809	0.73012	0.713494	0.775741	0.725353	1.73613	1.70841	1.74949	1.67989	1.63251	2.82237	2.83965	2.95557	3.02701	3.00003	2.40933	2.45234	2.5216	2.44074	2.46647	1.79613	1.68284	1.77046	1.83338	1.93859	1.26862	1.32371	1.33949	1.26884	1.41933	2.66882	2.64371	2.77587	2.82813	2.73388	2.78628	2.64048	2.74216	2.4974	2.4985
2.67461	2.63006	2.60396	2.65617	2.64028	1.85001	1.84476	1.7891	1.88082	1.89995	0.129375	0.131844	0.14044	0.14725	0.154513	0.776082	0.838954	0.788055	0.735766	0.816881	2.31057	2.396	2.33298	2.46911	2.40933	3.12061	3.17855	3.1977	3.12844	3.2406	2.30186	2.48253	2.32907	2.54526	2.56816	1.8916	1.9753	1.79897	1.87237	2.01312	1.91402	1.97632	1.98654	2.00742	1.98183	1.57878	1.48316	1.47652	1.43397	1.3627
2.59857	2.69305	2.72369	2.66808	2.57729	1.89211	1.80209	1.86397	1.94721	1.95198	0.130652	0.145916	0.140072	0.150995	0.138681	0.823718	0.843295	0.869368	0.828626	0.850983	2.32152	2.39271	2.41807	2.51743	2.45234	3.17855	3.09899	3.27371	3.29652	3.34279	2.36896	2.48988	2.53885	2.55809	2.47547	1.83563	1.91978	1.91263	2.0094	2.03647	1.93742	2.01936	1.94517	2.08919	1.91036	1.57614	1.5232	1.51715	1.47723	1.37666
2.71149	2.69106	2.72511	2.85278	2.75036	1.83787	1.85869	1.83052	1.96994	2.0142	0.138539	0.128808	0.139759	0.135475	0.131617	0.822101	0.81864	0.82786	0.843238	0.872461	2.40845	2.47899	2.56731	2.54858	2.5216	3.1977	3.27371	3.36637	3.43143	3.38325	2.51173	2.44766	2.46783	2.5353	2.48954	1.84482	1.8703	1.89359	2.04166	2.13614	1.9587	2.04192	2.06981	2.05517	2.0405	1.54013	1.51851	1.39515	1.43411	1.38012
2.81136	2.64709	2.69645	2.6922	2.65844	1.80777	1.87957	1.89112	1.96886	1.98784	0.128099	0.13522	0.140298	0.142738	0.149321	0.9115	0.86917	0.890307	0.873652	0.833421	2.48191	2.57023	2.53496	2.62042	2.44074	3.12844	3.29652	3.43143	3.32574	3.38186	2.39557	2.47836	2.5071	2.49947	2.64808	1.83077	2.01797	1.91078	1.97587	2.0624	1.94287	2.04858	2.05539	2.15506	2.03987	1.60814	1.5131	1.48878	1.44844	1.36
2.71773	2.63631	2.70724	2.78412	2.6173	1.84899	1.86479	1.86911	2.00617	1.94704	0.131986	0.12929	0.14603	0.137405	0.144072	0.915728	0.891498	0.806837	0.825108	0.947788	2.3878	2.53868	2.41228	2.43716	2.46647	3.2406	3.34279	3.38325	3.38186	3.34634	2.46395	2.48511	2.52387	2.51419	2.5839	1.91439	1.90973	1.99956	2.00461	1.98872	2.00259	1.93657	1.92877	2.15027	2.02875	1.48637	1.55199	1.50439	1.44659	1.44546
3.13054	2.99728	3.0873	3.18507	3.05737	2.89517	2.92473	2.97787	3.15043	3.22397	2.81854	2.90561	2.88683	3.06322	3.06974	0.551548	0.507798	0.492931	0.532141	0.505443	1.61109	1.75985	1.67368	1.65771	1.79613	2.30186	2.36896	2.51173	2.39557	2.46395	2.10156	2.21496	2.29936	2.34882	2.28753	1.83804	1.89878	2.04632	2.05423	2.05962	1.94029	2.10141	2.00938	2.12624	2.13855	2.16579	2.09262	2.00407	2.05579	1.91351
3.15795	3.11446	3.16209	3.10228	3.12206	2.97748	2.95282	3.09692	3.13576	3.20871	2.83116	3.00996	3.00094	3.06166	3.10663	0.460729	0.475568	0.512877	0.520509	0.476391	1.673	1.70693	1.81157	1.81108	1.68284	2.48253	2.48988	2.44766	2.47836	2.48511	2.21496	2.40179	2.27218	2.28716	2.46171	1.93819	2.01071	1.92142	2.06291	2.2372	2.05029	1.97712	2.07162	2.11288	1.98103	2.17288	2.12689	2.04725	2.10045	1.99613
3.10421	3.14101	3.24724	3.188	3.13928	3.0673	3.03121	3.08126	3.15543	3.29187	2.90073	3.04983	3.04117	3.08708	3.07882	0.568883	0.499485	0.549193	0.532595	0.534042	1.66279	1.7256	1.6896	1.83387	1.77046	2.32907	2.53885	2.46783	2.5071	2.52387	2.29936	2.27218	2.33488	2.33942	2.43277	1.92911	2.04663	1.9301	2.1463	2.08989	2.03383	2.12845	2.09869	2.15478	2.09946	2.24117	2.20332	2.13818	2.05758	2.03973
3.23821	3.24636	3.18672	3.27169	3.19662	3.08904	3.16975	3.13307	3.28352	3.35959	2.92323	3.10192	3.10873	3.21807	3.24698	0.518778	0.51055	0.523346	0.538071	0.523034	1.84088	1.91056	1.67022	1.7912	1.83338	2.54526	2.55809	2.5353	2.49947	2.51419	2.34882	2.28716	2.33942	2.45195	2.43546	1.93161	1.99803	2.07369	2.12039	2.23862	2.10303	2.21141	2.20386	2.18531	2.18525	2.24841	2.2511	2.20338	2.12476	2.16394
3.31062	3.29723	3.24139	3.39344	3.32991	3.09338	3.26693	3.15687	3.30012	3.40527	3.11128	3.23436	3.21191	3.24136	3.29076	0.527715	0.587438	0.553307	0.519516	0.504933	1.76952	1.84181	1.79764	1.78544	1.93859	2.56816	2.47547	2.48954	2.64808	2.5839	2.28753	2.46171	2.43277	2.43546	2.63494	2.01193	2.13878	2.10192	2.16568	2.21331	2.17073	2.18409	2.22423	2.31851	2.16128	2.40136	2.33823	2.25632	2.23317	2.09716
3.49487	3.3925	3.45234	3.44853	3.47693	3.27331	3.25385	3.26233	3.38589	3.50769	3.58273	3.63956	3.71338	3.75129	3.72859	3.79132	3.81169	3.86313	3.90594	3.83606	1.23778	1.24731	1.22631	1.23925	1.26862	1.8916	1.83563	1.84482	1.83077	1.91439	1.83804	1.93819	1.92911	1.93161	2.01193	2.04867	2.18258	2.18562	2.23416	2.375	2.23496	2.31426	2.3466	2.35072	2.30524	2.21487	2.06033	2.01658	2.01374	2.02705
3.61828	3.63678	3.55144	3.61054	3.53115	3.32225	3.43585	3.38711	3.50131	3.54795	3.72456	3.85295	3.8509	3.9289	3.9361	3.99841	4.08863	4.0772	4.04831	3.9428	1.29897	1.31129	1.3175	1.26581	1.32371	1.9753	1.91978	1.8703	2.01797	1.90973	1.89878	2.01071	2.04663	1.99803	2.13878	2.18258	2.2408	2.42187	2.28719	2.50446	2.32359	2.29145	2.34357	2.43419	2.35971	2.40655	2.2845	2.09917	2.14315	2.0001
3.57921	3.65622	3.56968	3.62214	3.57357	3.3849	3.45358	3.40569	3.5749	3.64126	3.79756	3.91457	3.9222	3.95528	4.01458	4.06179	3.9933	4.06468	4.04304	4.01832	1.26967	1.3764	1.37254	1.35628	1.33949	1.79897	1.91263	1.89359	1.91078	1.99956	2.04632	1.92142	1.9301	2.07369	2.10192	2.18562	2.42187	2.37262	2.45453	2.47759	2.41521	2.39671	2.41299	2.41512	2.36774	2.34575	2.26444	2.2334	2.08334	2.08104
3.7209	3.70442	3.72096	3.76689	3.74374	3.51963	3.53975	3.56205	3.66887	3.78673	3.82483	3.96791	3.98442	4.05251	4.1191	4.18473	4.26346	4.18353	4.22232	4.23279	1.27622	1.24666	1.31353	1.34885	1.26884	1.87237	2.0094	2.04166	1.97587	2.00461	2.05423	2.06291	2.1463	2.12039	2.16568	2.23416	2.28719	2.45453	2.53502	2.52239	2.44173	2.47453	2.57883	2.59846	2.48923	2.48497	2.35398	2.32104	2.18576	2.11988
3.77648	3.81601	3.79824	3.88796	3.82965	3.55615	3.55572	3.5728	3.77118	3.87065	4.00167	4.18978	4.12092	4.21732	4.28598	4.27387	4.34313	4.30423	4.24567	4.32244	1.36457	1.37929	1.37566	1.49548	1.41933	2.01312	2.03647	2.13614	2.0624	1.98872	2.05962	2.2372	2.08989	2.23862	2.21331	2.375	2.50446	2.47759	2.52239	2.69231	2.40008	2.53874	2.51743	2.62382	2.55766	2.48457	2.31363	2.29298	2.29508	2.15651
3.37159	3.38183	3.30509	3.45435	3.35462	3.39837	3.51365	3.48357	3.63099	3.71356	3.64921	3.74088	3.6916	3.81132	3.89374	4.32814	4.28425	4.39998	4.34154	4.38651	2.5418	2.60161	2.57627	2.63977	2.66882	1.91402	1.93742	1.9587	1.94287	2.00259	1.94029	2.05029	2.03383	2.10303	2.17073	2.23496	2.32359	2.41521	2.44173	2.40008	2.69106	2.70238	2.64516	2.86635	2.75306	2.51295	2.40113	2.3687	2.41325	2.32731
3.48122	3.40127	3.57002	3.50383	3.43475	3.50261	3.62614	3.55856	3.75745	3.768	3.66461	3.86271	3.88254	3.86387	4.00576	4.50541	4.41774	4.5329	4.45559	4.41885	2.77601	2.667	2.66195	2.74857	2.64371	1.97632	2.01936	2.04192	2.04858	1.93657	2.10141	1.97712	2.12845	2.21141	2.18409	2.31426	2.29145	2.39671	2.47453	2.53874	2.70238	2.70417	2.77987	2.78375	2.8203	2.60887	2.57848	2.47036	2.37923	2.28112
3.53737	3.50936	3.47801	3.46261	3.54355	3.51802	3.54857	3.64583	3.72539	3.73886	3.715	3.83467	3.75027	3.88489	3.91332	4.30797	4.44532	4.4159	4.36543	4.39621	2.57641	2.60717	2.62893	2.63018	2.77587	1.98654	1.94517	2.06981	2.05539	1.92877	2.00938	2.07162	2.09869	2.20386	2.22423	2.3466	2.34357	2.41299	2.57883	2.51743	2.64516	2.77987	2.74259	2.83199	2.79896	2.51493	2.54651	2.48619	2.40119	2.27255
3.58844	3.5871	3.6399	3.63079	3.50987	3.67764	3.67225	3.65519	3.85164	3.90467	3.69125	3.96186	3.87652	3.94107	3.96209	4.56633	4.4353	4.61552	4.51285	4.49534	2.67347	2.74557	2.70423	2.70956	2.82813	2.00742	2.08919	2.05517	2.15506	2.15027	2.12624	2.11288	2.15478	2.18531	2.31851	2.35072	2.43419	2.41512	2.59846	2.62382	2.86635	2.78375	2.83199	2.87894	2.82243	2.65937	2.59239	2.49314	2.4591	2.38082
3.57646	3.51203	3.47722	3.53938	3.51921	3.4714	3.57706	3.56631	3.73049	3.76919	3.77657	3.83289	3.85828	3.93522	3.90424	4.42807	4.38835	4.45812	4.37808	4.33615	2.63106	2.70616	2.66817	2.78781	2.73388	1.98183	1.91036	2.0405	2.03987	2.02875	2.13855	1.98103	2.09946	2.18525	2.16128	2.30524	2.35971	2.36774	2.48923	2.55766	2.75306	2.8203	2.79896	2.82243	2.71206	2.54302	2.50455	2.49567	2.37872	2.4156
0	0	0	0	0	3.21938	3.29396	3.37366	3.46017	3.58489	3.75677	3.92302	3.88379	3.95066	4.04318	4.10429	4.16055	4.15057	4.00508	4.13164	2.71597	2.85153	2.77425	2.76999	2.78628	1.57878	1.57614	1.54013	1.60814	1.48637	2.16579	2.17288	2.24117	2.24841	2.40136	2.21487	2.40655	2.34575	2.48497	2.48457	2.51295	2.60887	2.51493	2.65937	2.54302	2.7991	2.71546	2.62683	2.59525	2.39708
0	0	0	0	0	3.11378	3.1272	3.23807	3.37343	3.42757	3.69579	3.83093	3.72544	3.86835	3.88427	3.94731	4.10503	3.98706	3.94547	4.05067	2.66261	2.63798	2.63781	2.71257	2.64048	1.48316	1.5232	1.51851	1.5131	1.55199	2.09262	2.12689	2.20332	2.2511	2.33823	2.06033	2.2845	2.26444	2.35398	2.31363	2.40113	2.57848	2.54651	2.59239	2.50455	2.71546	2.6312	2.56972	2.45056	2.50086
0	0	0	0	0	3.11131	3.12884	3.0753	3.27271	3.31258	3.63647	3.68635	3.78105	3.77949	3.81601	3.86926	3.9205	3.86341	3.92226	3.90827	2.56844	2.65634	2.61157	2.64017	2.74216	1.47652	1.51715	1.39515	1.48878	1.50439	2.00407	2.04725	2.13818	2.20338	2.25632	2.01658	2.09917	2.2334	2.32104	2.29298	2.3687	2.47036	2.48619	2.49314	2.49567	2.62683	2.56972	2.56192	2.51014	2.37829
0	0	0	0	0	3.00108	3.0151	3.065	3.2162	3.22732	3.48017	3.64665	3.62069	3.68479	3.74508	3.75135	3.8288	3.79813	3.79441	3.77654	2.45322	2.53899	2.54339	2.61682	2.4974	1.43397	1.47723	1.43411	1.44844	1.44659	2.05579	2.10045	2.05758	2.12476	2.23317	2.01374	2.14315	2.08334	2.18576	2.29508	2.41325	2.37923	2.40119	2.4591	2.37872	2.59525	2.45056	2.51014	2.43759	2.22137
0	0	0	0	0	2.91852	2.91756	2.95881	3.10833	3.18028	3.33232	3.45478	3.45818	3.57856	3.64231	3.71651	3.76091	3.72105	3.65715	3.61215	2.43058	2.41796	2.47632	2.58518	2.4985	1.3627	1.37666	1.38012	1.36	1.44546	1.91351	1.99613	2.03973	2.16394	2.09716	2.02705	2.0001	2.08104	2.11988	2.15651	2.32731	2.28112	2.27255	2.38082	2.4156	2.39708	2.50086	2.37829	2.22137	2.33784
0	0	0	0	0	0	0	0	0	0	2.29184	2.23626	2.21567	2.2555	2.3708	3.25487	3.26976	3.33184	3.20405	3.32171	1.97215	1.99298	2.07134	2.02895	2.06246	1.35992	1.29038	1.31546	1.4166	1.40786	1.2866	1.27015	1.22541	1.40971	1.35802	2.00645	2.08263	2.15577	2.13285	2.31457	2.26197	2.32135	2.30535	2.29899	2.30785	2.7829	2.56847	2.50543	2.49343	2.49669
0	0	0	0	0	0	0	0	0	0	2.19879	2.2614	2.26574	2.34291	2.34941	3.17197	3.16797	3.21705	3.1834	3.16885	1.86281	1.93584	1.93825	2.01062	1.99689	1.30893	1.28519	1.38599	1.37291	1.50464	1.19093	1.23965	1.22075	1.29676	1.25812	1.93053	2.1169	2.02983	2.18185	2.32342	2.17047	2.32836	2.1821	2.28912	2.2216	2.70843	2.5559	2.54637	2.42176	2.25888
0	0	0	0	0	0	0	0	0	0	2.08084	2.15192	2.1263	2.16914	2.22239	3.13429	3.09599	3.09692	3.03141	3.17324	1.85418	1.84201	1.85569	1.88865	1.92585	1.26711	1.28238	1.28258	1.33015	1.34848	1.18475	1.25429	1.13666	1.25313	1.18483	1.90014	1.97331	2.05979	2.06584	2.15983	2.10987	2.2292	2.1047	2.18406	2.11421	2.46131	2.41895	2.38927	2.32898	2.1928
0	0	0	0	0	0	0	0	0	0	2.05866	2.0674	2.07321	2.11517	2.10141	2.96306	2.97759	3.0437	2.95001	2.99283	1.80493	1.78107	1.81429	1.85293	1.84167	1.22234	1.26527	1.25341	1.20208	1.27333	1.13161	1.16242	1.1629	1.23897	1.17442	1.83446	1.95686	1.97292	2.01304	2.03531	2.01925	2.11512	2.11421	2.10768	2.1148	2.38944	2.45058	2.44003	2.31006	2.1377
0	0	0	0	0	0	0	0	0	0	1.90494	1.98273	1.98299	2.05576	2.08408	2.79868	2.92839	2.97682	2.92593	2.86626	1.71286	1.65283	1.73905	1.83202	1.82913	1.13884	1.21709	1.24084	1.22166	1.19684	1.13632	1.11813	1.11198	1.21894	1.17519	1.75667	1.87895	1.88111	1.965	1.92043	1.96429	2.05281	2.09361	2.07304	2.05514	2.41364	2.22963	2.23811	2.15126	2.11415
0	0	0	0	0	0	0	0	0	0	0	0	0	0	0	1.69544	1.77531	1.7515	1.70719	1.79094	1.44622	1.48586	1.44645	1.54135	1.50373	0.944695	0.994091	0.9826	0.987877	0.971734	0.879242	0.870702	0.905457	0.957945	0.998063	0.745072	0.785672	0.791658	0.81305	0.830215	2.05066	2.0584	2.07741	2.01965	2.00223	2.39793	2.47918	2.28708	2.33057	2.17004
0	0	0	0	0	0	0	0	0	0	0	0	0	0	0	1.70722	1.69102	1.75706	1.69056	1.65657	1.39785	1.38664	1.43297	1.49894	1.47176	0.930765	0.893484	0.970883	0.970202	0.958115	0.887129	0.85121	0.878476	0.888576	0.903641	0.667872	0.708671	0.750519	0.774408	0.796141	1.93969	1.92429	2.06226	2.09117	2.02211	2.38408	2.30393	2.2204	2.2254	2.22109
0	0	0	0	0	0	0	0	0	0	0	0	0	0	0	1.72024	1.78833	1.75043	1.70889	1.7077	1.38627	1.44651	1.51585	1.45814	1.45394	0.961917	0.962172	0.983309	0.998999	1.0085	0.884008	0.853679	0.930084	0.947221	0.909543	0.707337	0.779515	0.820824	0.782551	0.793218	1.9749	2.06819	2.11018	2.10042	2.075	2.40919	2.37858	2.41909	2.1926	2.13804
0	0	0	0	0	0	0	0	0	0	0	0	0	0	0	1.67212	1.70841	1.70185	1.70287	1.6997	1.44007	1.44466	1.41167	1.4069	1.42455	0.909316	0.909004	0.938283	0.90401	0.988984	0.888633	0.855182	0.860885	0.925062	0.908096	0.706911	0.686626	0.7268	0.77001	0.784281	1.89305	2.00926	2.02248	1.99485	1.93853	2.42462	2.35457	2.26299	2.21524	2.09049
0	0	0	0	0	0	0	0	0	0	0	0	0	0	0	1.70197	1.73071	1.69187	1.71147	1.70895	1.48053	1.49596	1.35878	1.51888	1.46821	0.931134	0.961974	0.945518	1.00192	0.940355	0.8324	0.889881	0.858332	0.88259	0.910451	0.742859	0.771684	0.804085	0.740873	0.812313	1.95467	1.98109	2.03324	2.00898	1.9162	2.39611	2.46474	2.38215	2.31023	2.19141
0	0	0	0	0	0	0	0	0	0	0	0	0	0	0	0	0	0	0	0	0.941319	1.02377	1.02683	1.01032	1.03296	0.885143	0.924268	0.969521	0.954427	0.984813	0.711962	0.727878	0.699138	0.737525	0.759428	0.561194	0.598673	0.61876	0.59419	0.656466	0.528822	0.531687	0.587069	0.53129	0.541561	2.49127	2.35747	2.29017	2.19271	2.12576
0	0	0	0	0	0	0	0	0	0	0	0	0	0	0	0	0	0	0	0	0.997325	1.0632	1.01741	1.0421	1.01574	0.926112	0.935843	0.949887	0.95925	1.00226	0.683817	0.691931	0.756137	0.754207	0.786778	0.567407	0.572401	0.549278	0.598503	0.640323	0.519147	0.562556	0.555633	0.61249	0.56423	2.45178	2.36805	2.25899	2.21975	2.11188
0	0	0	0	0	0	0	0	0	0	0	0	0	0	0	0	0	0	0	0	1.0249	0.992842	0.942142	1.03926	1.03486	0.923871	0.905174	0.871525	0.9176	0.958938	0.67888	0.651473	0.657403	0.708727	0.727453	0.539121	0.55813	0.586104	0.591779	0.610504	0.515374	0.52014	0.508366	0.547263	0.527715	2.36388	2.29809	2.21016	2.14956	2.09265
0	0	0	0	0	0	0	0	0	0	0	0	0	0	0	0	0	0	0	0	0.979848	0.960754	0.984643	1.02527	0.995821	0.857793	0.891867	0.913486	0.904805	0.915189	0.670198	0.641912	0.703138	0.733553	0.649544	0.552399	0.499088	0.569507	0.587466	0.606844	0.485952	0.505642	0.5339	0.568173	0.512763	2.26117	2.25295	2.13038	2.09395	2.06788
0	0	0	0	0	0	0	0	0	0	0	0	0	0	0	0	0	0	0	0	0.933602	0.925459	0.944752	0.964017	0.913884	0.880348	0.854814	0.803546	0.920608	0.874192	0.618675	0.663134	0.627726	0.65031	0.648466	0.503089	0.515033	0.512848	0.580827	0.571947	0.479852	0.458091	0.508366	0.539433	0.47344	2.13299	2.09894	2.05131	2.0367	1.94162
0	0	0	0	0	0	0	0	0	0	0	0	0	0	0	0	0	0	0	0	0	0	0	0	0	0.537787	0.622562	0.647359	0.645401	0.611639	0.675476	0.656892	0.668893	0.642422	0.696669	0.41664	0.43074	0.438231	0.466829	0.477213	0.449438	0.416101	0.459651	0.475171	0.411533	0.456616	0.40478	0.411561	0.394765	0.352973
0	0	0	0	0	0	0	0	0	0	0	0	0	0	0	0	0	0	0	0	0	0	0	0	0	0.526779	0.565592	0.54	0.570472	0.572259	0.561847	0.643132	0.603667	0.611724	0.614051	0.40671	0.445948	0.403872	0.445806	0.417236	0.378139	0.432386	0.353683	0.427251	0.427137	0.373174	0.381118	0.345994	0.355612	0.343242
0	0	0	0	0	0	0	0	0	0	0	0	0	0	0	0	0	0	0	0	0	0	0	0	0	0.517019	0.499826	0.50272	0.499485	0.543774	0.583494	0.533106	0.600659	0.559548	0.561534	0.343043	0.39834	0.366223	0.395786	0.418938	0.337681	0.405518	0.401631	0.395701	0.36784	0.365202	0.354619	0.325623	0.330077	0.359073
0	0	0	0	0	0	0	0	0	0	0	0	0	0	0	0	0	0	0	0	0	0	0	0	0	0.483852	0.476022	0.483994	0.507798	0.499485	0.510777	0.534808	0.525474	0.570472	0.568315	0.348519	0.358931	0.404241	0.373628	0.413178	0.344689	0.351867	0.389913	0.381033	0.36889	0.353825	0.302784	0.326162	0.342646	0.336489
0	0	0	0	0	0	0	0	0	0	0	0	0	0	0	0	0	0	0	0	0	0	0	0	0	0.469695	0.440302	0.467908	0.467141	0.462035	0.532964	0.554101	0.555066	0.546412	0.558641	0.334418	0.385175	0.343299	0.343809	0.369826	0.336206	0.35635	0.361428	0.37865	0.360464	0.316147	0.336007	0.2924	0.300854	0.324431
0	0	0	0	0	0	0	0	0	0	0	0	0	0	0	0	0	0	0	0	0	0	0	0	0	0	0	0	0	0	0.30216	0.325339	0.272142	0.301507	0.34954	0.335184	0.348774	0.360776	0.394056	0.388495	0.311806	0.288569	0.320828	0.315438	0.287378	0.301507	0.318672	0.315948	0.288116	0.280285
0	0	0	0	0	0	0	0	0	0	0	0	0	0	0	0	0	0	0	0	0	0	0	0	0	0	0	0	0	0	0.310699	0.314558	0.354647	0.340093	0.354534	0.363726	0.436755	0.374451	0.375586	0.406454	0.308855	0.293506	0.314898	0.33717	0.294187	0.314473	0.295577	0.297478	0.278781	0.300315
0	0	0	0	0	0	0	0	0	0	0	0	0	0	0	0	0	0	0	0	0	0	0	0	0	0	0	0	0	0	0.33473	0.328205	0.31609	0.323211	0.310699	0.334248	0.407277	0.341256	0.375955	0.381629	0.264141	0.299464	0.279689	0.292258	0.281136	0.296003	0.278242	0.288144	0.301592	0.2802
0	0	0	0	0	0	0	0	0	0	0	0	0	0	0	0	0	0	0	0	0	0	0	0	0	0	0	0	0	0	0.324658	0.301961	0.28874	0.292797	0.303436	0.329595	0.38614	0.376664	0.352236	0.394339	0.300656	0.27166	0.3086	0.276824	0.294471	0.288456	0.27549	0.279037	0.265134	0.302642
0	0	0	0	0	0	0	0	0	0	0	0	0	0	0	0	0	0	0	0	0	0	0	0	0	0	0	0	0	0	0.301706	0.280171	0.269021	0.313139	0.302216	0.309224	0.30406	0.382111	0.369003	0.337568	0.269759	0.234067	0.273419	0.282725	0.30894	0.271178	0.279831	0.258183	0.261361	0.260793
0	0	0	0	0	0	0	0	0	0	0	0	0	0	0	0	0	0	0	0	0	0	0	0	0	0	0	0	0	0	0	0	0	0	0	0.208391	0.233188	0.228024	0.258552	0.239486	0.277249	0.292031	0.285988	0.293137	0.301422	0.283803	0.260623	0.24987	0.219342	0.220392
0	0	0	0	0	0	0	0	0	0	0	0	0	0	0	0	0	0	0	0	0	0	0	0	0	0	0	0	0	0	0	0	0	0	0	0.210831	0.224052	0.224591	0.195765	0.221045	0.270497	0.270185	0.302699	0.28786	0.274894	0.234805	0.247487	0.221272	0.191084	0.234464
0	0	0	0	0	0	0	0	0	0	0	0	0	0	0	0	0	0	0	0	0	0	0	0	0	0	0	0	0	0	0	0	0	0	0	0.194489	0.227797	0.215654	0.210916	0.227939	0.261531	0.255176	0.243458	0.242323	0.280484	0.256651	0.220392	0.221584	0.204873	0.204249
0	0	0	0	0	0	0	0	0	0	0	0	0	0	0	0	0	0	0	0	0	0	0	0	0	0	0	0	0	0	0	0	0	0	0	0.180388	0.191538	0.196475	0.226747	0.23994	0.288683	0.247969	0.262467	0.266298	0.245104	0.219087	0.23872	0.203993	0.203482	0.177494
0	0	0	0	0	0	0	0	0	0	0	0	0	0	0	0	0	0	0	0	0	0	0	0	0	0	0	0	0	0	0	0	0	0	0	0.190346	0.193098	0.185949	0.185353	0.201099	0.23262	0.24482	0.26068	0.243515	0.231911	0.207994	0.192077	0.182629	0.199255	0.210462
0	0	0	0	0	0	0	0	0	0	0	0	0	0	0	0	0	0	0	0	0	0	0	0	0	0	0	0	0	0	0	0	0	0	0	0	0	0	0	0	0.211597	0.20561	0.209128	0.20527	0.201213	0.24604	0.237897	0.265446	0.203369	0.205752
0	0	0	0	0	0	0	0	0	0	0	0	0	0	0	0	0	0	0	0	0	0	0	0	0	0	0	0	0	0	0	0	0	0	0	0	0	0	0	0	0.192503	0.191822	0.194432	0.185864	0.186034	0.229358	0.207511	0.216874	0.205922	0.187396
0	0	0	0	0	0	0	0	0	0	0	0	0	0	0	0	0	0	0	0	0	0	0	0	0	0	0	0	0	0	0	0	0	0	0	0	0	0	0	0	0.194687	0.196815	0.210774	0.196957	0.159762	0.224137	0.213072	0.212278	0.187793	0.189268
0	0	0	0	0	0	0	0	0	0	0	0	0	0	0	0	0	0	0	0	0	0	0	0	0	0	0	0	0	0	0	0	0	0	0	0	0	0	0	0	0.153974	0.168018	0.172245	0.173096	0.162939	0.187538	0.190091	0.195567	0.17582	0.169975
0	0	0	0	0	0	0	0	0	0	0	0	0	0	0	0	0	0	0	0	0	0	0	0	0	0	0	0	0	0	0	0	0	0	0	0	0	0	0	0	0.130227	0.156158	0.137461	0.142653	0.156953	0.172727	0.172103	0.184644	0.168982	0.165152
0	0	0	0	0	0	0	0	0	0	0	0	0	0	0	0	0	0	0	0	0	0	0	0	0	0	0	0	0	0	0	0	0	0	0	0	0	0	0	0	0	0	0	0	0	0.197439	0.205468	0.209497	0.173862	0.165067
0	0	0	0	0	0	0	0	0	0	0	0	0	0	0	0	0	0	0	0	0	0	0	0	0	0	0	0	0	0	0	0	0	0	0	0	0	0	0	0	0	0	0	0	0	0.190942	0.196843	0.187736	0.161606	0.17616
0	0	0	0	0	0	0	0	0	0	0	0	0	0	0	0	0	0	0	0	0	0	0	0	0	0	0	0	0	0	0	0	0	0	0	0	0	0	0	0	0	0	0	0	0	0.150456	0.159676	0.166996	0.143391	0.150881
0	0	0	0	0	0	0	0	0	0	0	0	0	0	0	0	0	0	0	0	0	0	0	0	0	0	0	0	0	0	0	0	0	0	0	0	0	0	0	0	0	0	0	0	0	0.140667	0.111586	0.116665	0.112381	0.107472
0	0	0	0	0	0	0	0	0	0	0	0	0	0	0	0	0	0	0	0	0	0	0	0	0	0	0	0	0	0	0	0	0	0	0	0	0	0	0	0	0	0	0	0	0	0.0869028	0.0925488	0.100691	0.0863921	0.0990743
0	0	0	0	0	0	0	0	0	0	0	0	0	0	0	0	0	0	0	0	0	0	0	0	0	0	0	0	0	0	0	0	0	0	0	0	0	0	0	0	0	0	0	0	0	0	0	0	0	0
0	0	0	0	0	0	0	0	0	0	0	0	0	0	0	0	0	0	0	0	0	0	0	0	0	0	0	0	0	0	0	0	0	0	0	0	0	0	0	0	0	0	0	0	0	0	0	0	0	0
0	0	0	0	0	0	0	0	0	0	0	0	0	0	0	0	0	0	0	0	0	0	0	0	0	0	0	0	0	0	0	0	0	0	0	0	0	0	0	0	0	0	0	0	0	0	0	0	0	0
0	0	0	0	0	0	0	0	0	0	0	0	0	0	0	0	0	0	0	0	0	0	0	0	0	0	0	0	0	0	0	0	0	0	0	0	0	0	0	0	0	0	0	0	0	0	0	0	0	0
0	0	0	0	0	0	0	0	0	0	0	0	0	0	0	0	0	0	0	0	0	0	0	0	0	0	0	0	0	0	0	0	0	0	0	0	0	0	0	0	0	0	0	0	0	0	0	0	0	0
0	0	0	0	0	0	0	0	0	0	0	0	0	0	0	0	0	0	0	0	0	0	0	0	0	0	0	0	0	0	0	0	0	0	0	0	0	0	0	0	0	0	0	0	0	0	0	0	0	0
0	0	0	0	0	0	0	0	0	0	0	0	0	0	0	0	0	0	0	0	0	0	0	0	0	0	0	0	0	0	0	0	0	0	0	0	0	0	0	0	0	0	0	0	0	0	0	0	0	0
0	0	0	0	0	0	0	0	0	0	0	0	0	0	0	0	0	0	0	0	0	0	0	0	0	0	0	0	0	0	0	0	0	0	0	0	0	0	0	0	0	0	0	0	0	0	0	0	0	0
0	0	0	0	0	0	0	0	0	0	0	0	0	0	0	0	0	0	0	0	0	0	0	0	0	0	0	0	0	0	0	0	0	0	0	0	0	0	0	0	0	0	0	0	0	0	0	0	0	0
School
0.052209	0.0507281	0.0498643	0.271091	1.17747	2.96216	3.28796	0	0	0	0	0	0	0	0	0	0	0	0	0	0.00496733	0.00424075	0.00730616	0.00651901	0.00439663	0.0157841	0.014909	0.016068	0.0163514	0.0156335	0.0175807	0.0151933	0.0158668	0.0145122	0.013557	0.0120403	0.0111653	0.0129472	0.0140857	0.0138481	0.0122857	0.0126218	0.0119908	0.0114527	0.0123836	0.0130342	0.01306	0.00951179	0.00972225	0.0107562
0.0507281	0.0483135	0.0540697	0.262369	1.1287	2.87949	3.12917	0	0	0	0	0	0	0	0	0	0	0	0	0	0.00455228	0.00599025	0.00456978	0.00469679	0.00442436	0.0163699	0.014041	0.0152301	0.017018	0.013738	0.0147615	0.013092	0.0164911	0.0144294	0.0160563	0.00949264	0.0112548	0.00991281	0.0105194	0.011166	0.0122246	0.0131623	0.00849029	0.0110115	0.00950487	0.0154457	0.0131074	0.0109174	0.0132074	0.0134105
0.0498643	0.0540697	0.0473091	0.267311	1.15013	2.88491	3.1326	0	0	0	0	0	0	0	0	0	0	0	0	0	0.0041381	0.00598264	0.00535079	0.0050274	0.00748592	0.0153482	0.0116339	0.0182012	0.0184202	0.0144032	0.0161038	0.014947	0.0160083	0.0168784	0.0150605	0.00919276	0.00985218	0.0108338	0.0110421	0.0112954	0.0135449	0.0117637	0.012981	0.0129228	0.0129039	0.0109886	0.0135413	0.0131299	0.0156495	0.0102867
0.271091	0.262369	0.267311	1.21959	5.45639	13.9846	15.2917	0	0	0	0	0	0	0	0	0	0	0	0	0	0.0198477	0.0204411	0.0262423	0.0252784	0.0308496	0.072156	0.0633012	0.0773874	0.0785322	0.0788441	0.0749826	0.0708614	0.069878	0.0775133	0.068688	0.0504746	0.0584721	0.0568079	0.0620675	0.0621124	0.0609656	0.0576378	0.0530851	0.0608386	0.0545968	0.0624243	0.0637791	0.0571563	0.0675737	0.0512713
1.17747	1.1287	1.15013	5.45639	23.4177	60.5296	66.4971	0	0	0	0	0	0	0	0	0	0	0	0	0	0.098858	0.0967848	0.124992	0.115305	0.137536	0.294632	0.281422	0.326909	0.337193	0.327826	0.325916	0.314718	0.284902	0.327737	0.316566	0.210283	0.243123	0.236302	0.250239	0.239748	0.26566	0.253338	0.25485	0.254132	0.239149	0.26836	0.274546	0.24031	0.259076	0.227454
2.96216	2.87949	2.88491	13.9846	60.5296	156.108	171.016	0	0	0	0	0	0	0	0	0	0	0	0	0	0.24704	0.249238	0.294216	0.295734	0.329396	0.777375	0.694986	0.856718	0.883678	0.83856	0.850422	0.812537	0.796376	0.829344	0.78724	0.544127	0.595724	0.622822	0.617143	0.629281	0.664626	0.657849	0.635165	0.65179	0.612235	0.683633	0.695045	0.579182	0.690493	0.572332
3.28796	3.12917	3.1326	15.2917	66.4971	171.016	187.037	0	0	0	0	0	0	0	0	0	0	0	0	0	0.256479	0.272784	0.3319	0.330854	0.373758	0.809955	0.777003	0.963599	0.948398	0.965111	0.946243	0.884662	0.844461	0.931838	0.859397	0.601749	0.658562	0.669341	0.687539	0.696251	0.73892	0.70271	0.691638	0.724224	0.692093	0.767364	0.763308	0.643432	0.755492	0.606799
0	0	0	0	0	0	0	82.3217	85.8928	87.4647	88.828	92.002	0	0	0	0	0	0	0	0	0.280212	0.370422	0.365213	0.382808	0.380111	1.08934	1.18376	1.23135	1.26391	1.274	1.08698	1.18901	1.11725	1.18799	1.11886	0.801066	0.7914	0.880847	0.878756	0.903019	0.988273	1.02031	0.985227	1.01766	0.970121	1.31336	1.32984	1.22417	1.11769	1.2223
0	0	0	0	0	0	0	85.8928	89.4958	91.1492	92.583	95.9524	0	0	0	0	0	0	0	0	0.286211	0.38497	0.380799	0.417022	0.396133	1.1242	1.25175	1.29471	1.32481	1.32077	1.12601	1.22694	1.18381	1.24394	1.17232	0.835598	0.836873	0.912252	0.917556	0.950404	1.0333	1.08027	1.02363	1.04977	1.01413	1.3819	1.37163	1.27534	1.18268	1.27672
0	0	0	0	0	0	0	87.4647	91.1492	92.6913	94.2943	97.5892	0	0	0	0	0	0	0	0	0.292246	0.403341	0.388358	0.424022	0.401629	1.14651	1.25997	1.30534	1.34097	1.34555	1.15479	1.25587	1.20542	1.26469	1.21205	0.857506	0.847466	0.92279	0.938634	0.97145	1.04008	1.0938	1.05523	1.05701	1.00899	1.40301	1.40884	1.28931	1.19209	1.29346
0	0	0	0	0	0	0	88.828	92.583	94.2943	95.905	99.3365	0	0	0	0	0	0	0	0	0.298901	0.401217	0.386798	0.421372	0.417088	1.17995	1.27745	1.31767	1.35724	1.38032	1.17463	1.27293	1.219	1.28695	1.21167	0.859991	0.862067	0.936564	0.958153	0.986602	1.06897	1.09441	1.07466	1.07383	1.04038	1.41154	1.43497	1.29668	1.20305	1.30905
0	0	0	0	0	0	0	92.002	95.9524	97.5892	99.3365	102.787	0	0	0	0	0	0	0	0	0.313545	0.412441	0.406963	0.426709	0.419818	1.22247	1.33823	1.37816	1.40108	1.409	1.20783	1.31826	1.26226	1.32059	1.25642	0.900598	0.895839	0.977863	0.991493	1.01149	1.10696	1.14743	1.09417	1.12165	1.06885	1.47169	1.47461	1.35105	1.24639	1.36011
0	0	0	0	0	0	0	0	0	0	0	0	155.215	158.649	160.477	0	0	0	0	0	0.183339	0.228386	0.233614	0.279601	0.230682	1.11625	1.24082	1.27976	1.24698	1.35851	1.68878	1.70376	1.60068	1.75316	1.80094	1.28698	1.41262	1.32287	1.45845	1.47547	1.51882	1.50718	1.49291	1.48999	1.49159	1.66245	1.73449	1.64002	1.57963	1.64422
0	0	0	0	0	0	0	0	0	0	0	0	158.649	162.12	163.982	0	0	0	0	0	0.190031	0.229245	0.240614	0.289413	0.23192	1.13544	1.26211	1.31793	1.27116	1.38933	1.72375	1.7316	1.63959	1.79333	1.83181	1.3124	1.44932	1.35753	1.48334	1.50744	1.55465	1.54089	1.53355	1.51163	1.51665	1.70416	1.77543	1.68637	1.61115	1.68884
0	0	0	0	0	0	0	0	0	0	0	0	160.477	163.982	165.871	0	0	0	0	0	0.1887	0.235244	0.243469	0.289895	0.235879	1.14885	1.28907	1.32581	1.2957	1.40766	1.75429	1.75192	1.65145	1.80701	1.86097	1.33085	1.46665	1.36444	1.50385	1.51486	1.56936	1.56324	1.5437	1.53012	1.5431	1.71917	1.80039	1.69584	1.63611	1.70887
0	0	0	0	0	0	0	0	0	0	0	0	0	0	0	149.651	150.193	131.653	121.408	0	0.0261921	0.0285704	0.0276707	0.0312157	0.0211582	0.217718	0.216913	0.216589	0.213113	0.288281	0.393058	0.480885	0.476294	0.428204	0.453138	0.44343	0.460494	0.464789	0.453411	0.533668	0.478179	0.473116	0.571206	0.534173	0.565893	0.581485	0.571188	0.617637	0.565366	0.527093
0	0	0	0	0	0	0	0	0	0	0	0	0	0	0	150.193	150.626	132.115	121.756	0	0.0260117	0.0283532	0.0284135	0.032058	0.0214841	0.21643	0.217043	0.218699	0.213493	0.290634	0.398497	0.483935	0.47758	0.428623	0.454002	0.451782	0.462212	0.466811	0.450797	0.540248	0.47777	0.47281	0.573732	0.533598	0.569133	0.583945	0.572902	0.623745	0.573654	0.527858
0	0	0	0	0	0	0	0	0	0	0	0	0	0	0	131.653	132.115	115.784	106.872	0	0.0234922	0.023996	0.0246854	0.0270448	0.0183442	0.192599	0.189394	0.193147	0.188439	0.253323	0.348104	0.423409	0.419385	0.376824	0.401007	0.398919	0.400081	0.408011	0.395186	0.471149	0.415409	0.417248	0.504727	0.467528	0.494573	0.510451	0.501737	0.542857	0.49841	0.465813
0	0	0	0	0	0	0	0	0	0	0	0	0	0	0	121.408	121.756	106.872	98.422	0	0.0211872	0.0223145	0.0220203	0.0258291	0.0167012	0.179226	0.176309	0.178119	0.173566	0.231973	0.319165	0.392385	0.388339	0.347227	0.368699	0.36274	0.368478	0.376575	0.366024	0.435559	0.384639	0.378498	0.466086	0.431578	0.461415	0.470476	0.470511	0.500426	0.465058	0.427764
0	0	0	0	0	0	0	0	0	0	0	0	0	0	0	0	0	0	0	51.096	34.7943	29.9317	27.7316	24.9273	22.7713	18.7444	15.4872	12.5926	10.2012	9.6637	6.36194	6.32853	6.4168	6.46356	6.86001	0.77366	0.819131	0.820629	0.845695	0.804275	1.0594	1.14773	1.161	1.17304	1.13604	1.18421	1.18722	1.18231	1.12477	1.07924
0.00496733	0.00455228	0.0041381	0.0198477	0.098858	0.24704	0.256479	0.280212	0.286211	0.292246	0.298901	0.313545	0.183339	0.190031	0.1887	0.0261921	0.0260117	0.0234922	0.0211872	34.7943	23.6347	20.3491	18.8877	16.9572	15.4979	12.7754	10.5505	8.56306	6.97342	6.5735	4.34665	4.32477	4.38124	4.40367	4.66701	0.534488	0.567732	0.56655	0.580572	0.552734	0.726539	0.781464	0.800941	0.802227	0.774622	0.811982	0.813775	0.814044	0.771641	0.739403
0.00424075	0.00599025	0.00598264	0.0204411	0.0967848	0.249238	0.272784	0.370422	0.38497	0.403341	0.401217	0.412441	0.228386	0.229245	0.235244	0.0285704	0.0283532	0.023996	0.0223145	29.9317	20.3491	17.4895	16.2487	14.6001	13.3374	10.9817	9.06622	7.36169	5.97593	5.65535	3.73423	3.71784	3.74655	3.79108	4.03196	0.458714	0.483627	0.48564	0.499635	0.481456	0.623661	0.670174	0.694046	0.694581	0.670886	0.703921	0.699772	0.696226	0.666729	0.638635
0.00730616	0.00456978	0.00535079	0.0262423	0.124992	0.294216	0.3319	0.365213	0.380799	0.388358	0.386798	0.406963	0.233614	0.240614	0.243469	0.0276707	0.0284135	0.0246854	0.0220203	27.7316	18.8877	16.2487	15.0479	13.5289	12.3967	10.157	8.41421	6.85208	5.57567	5.25359	3.46942	3.46694	3.48423	3.5196	3.74417	0.427013	0.454688	0.452493	0.461586	0.444112	0.587005	0.625447	0.645017	0.646432	0.624668	0.656595	0.648329	0.641925	0.622199	0.594764
0.00651901	0.00469679	0.0050274	0.0252784	0.115305	0.295734	0.330854	0.382808	0.417022	0.424022	0.421372	0.426709	0.279601	0.289413	0.289895	0.0312157	0.032058	0.0270448	0.0258291	24.9273	16.9572	14.6001	13.5289	12.1671	11.1517	9.1671	7.54075	6.14302	4.98022	4.71807	3.11358	3.10217	3.13398	3.16179	3.35869	0.384607	0.407905	0.408693	0.419859	0.399387	0.526131	0.56944	0.577309	0.58071	0.562456	0.593513	0.585285	0.587218	0.55772	0.537465
0.00439663	0.00442436	0.00748592	0.0308496	0.137536	0.329396	0.373758	0.380111	0.396133	0.401629	0.417088	0.419818	0.230682	0.23192	0.235879	0.0211582	0.0214841	0.0183442	0.0167012	22.7713	15.4979	13.3374	12.3967	11.1517	10.1864	8.36696	6.91011	5.60766	4.55009	4.31867	2.84974	2.85455	2.8703	2.88849	3.07274	0.354576	0.370716	0.37088	0.384218	0.366497	0.482262	0.514108	0.528484	0.531299	0.517738	0.54059	0.538851	0.534916	0.516895	0.485651
0.0157841	0.0163699	0.0153482	0.072156	0.294632	0.777375	0.809955	1.08934	1.1242	1.14651	1.17995	1.22247	1.11625	1.13544	1.14885	0.217718	0.21643	0.192599	0.179226	18.7444	12.7754	10.9817	10.157	9.1671	8.36696	6.91639	5.71042	4.66175	3.79453	3.58137	2.36725	2.36052	2.3918	2.3992	2.56234	0.309683	0.32421	0.328368	0.338766	0.322549	0.419965	0.439978	0.460117	0.459253	0.447022	0.469844	0.462441	0.463594	0.447027	0.425595
0.014909	0.014041	0.0116339	0.0633012	0.281422	0.694986	0.777003	1.18376	1.25175	1.25997	1.27745	1.33823	1.24082	1.26211	1.28907	0.216913	0.217043	0.189394	0.176309	15.4872	10.5505	9.06622	8.41421	7.54075	6.91011	5.71042	4.72315	3.85987	3.14665	2.94469	1.97023	1.95796	1.97279	1.99614	2.12317	0.260186	0.275519	0.276358	0.284964	0.267401	0.352697	0.374845	0.380793	0.385343	0.372042	0.392041	0.390945	0.391652	0.375204	0.356397
0.016068	0.0152301	0.0182012	0.0773874	0.326909	0.856718	0.963599	1.23135	1.29471	1.30534	1.31767	1.37816	1.27976	1.31793	1.32581	0.216589	0.218699	0.193147	0.178119	12.5926	8.56306	7.36169	6.85208	6.14302	5.60766	4.66175	3.85987	3.14724	2.55299	2.40904	1.60874	1.60892	1.62568	1.62674	1.73639	0.218429	0.23367	0.233564	0.241509	0.229415	0.292491	0.310421	0.31818	0.315584	0.311737	0.33315	0.329376	0.322671	0.311534	0.303064
0.0163514	0.017018	0.0184202	0.0785322	0.337193	0.883678	0.948398	1.26391	1.32481	1.34097	1.35724	1.40108	1.24698	1.27116	1.2957	0.213113	0.213493	0.188439	0.173566	10.2012	6.97342	5.97593	5.57567	4.98022	4.55009	3.79453	3.14665	2.55299	2.0939	1.96531	1.31727	1.31219	1.31551	1.33634	1.41862	0.182153	0.190267	0.19291	0.202671	0.189525	0.24138	0.259596	0.263392	0.268293	0.25474	0.282037	0.271832	0.27152	0.262272	0.249902
0.0156335	0.013738	0.0144032	0.0788441	0.327826	0.83856	0.965111	1.274	1.32077	1.34555	1.38032	1.409	1.35851	1.38933	1.40766	0.288281	0.290634	0.253323	0.231973	9.6637	6.5735	5.65535	5.25359	4.71807	4.31867	3.58137	2.94469	2.40904	1.96531	1.86265	1.24358	1.24673	1.2583	1.25918	1.33837	0.169527	0.186127	0.183845	0.193387	0.181941	0.234178	0.248067	0.251223	0.25249	0.246682	0.267392	0.263452	0.259365	0.251733	0.242418
0.0175807	0.0147615	0.0161038	0.0749826	0.325916	0.850422	0.946243	1.08698	1.12601	1.15479	1.17463	1.20783	1.68878	1.72375	1.75429	0.393058	0.398497	0.348104	0.319165	6.36194	4.34665	3.73423	3.46942	3.11358	2.84974	2.36725	1.97023	1.60874	1.31727	1.24358	0.829073	0.835606	0.844005	0.847439	0.898501	0.126259	0.129889	0.135498	0.138553	0.134652	0.165494	0.176846	0.181877	0.178788	0.17426	0.191783	0.1894	0.187697	0.179298	0.17449
0.0151933	0.013092	0.014947	0.0708614	0.314718	0.812537	0.884662	1.18901	1.22694	1.25587	1.27293	1.31826	1.70376	1.7316	1.75192	0.480885	0.483935	0.423409	0.392385	6.32853	4.32477	3.71784	3.46694	3.10217	2.85455	2.36052	1.95796	1.60892	1.31219	1.24673	0.835606	0.832017	0.834845	0.843873	0.898257	0.124789	0.139032	0.134412	0.137501	0.13226	0.165676	0.181005	0.178955	0.177655	0.175373	0.190948	0.188633	0.183159	0.180003	0.174982
0.0158668	0.0164911	0.0160083	0.069878	0.284902	0.796376	0.844461	1.11725	1.18381	1.20542	1.219	1.26226	1.60068	1.63959	1.65145	0.476294	0.47758	0.419385	0.388339	6.4168	4.38124	3.74655	3.48423	3.13398	2.8703	2.3918	1.97279	1.62568	1.31551	1.2583	0.844005	0.834845	0.834187	0.850947	0.900764	0.125379	0.132332	0.136098	0.141096	0.133863	0.17109	0.176428	0.181494	0.179865	0.175146	0.190699	0.190451	0.186857	0.177712	0.174476
0.0145122	0.0144294	0.0168784	0.0775133	0.327737	0.829344	0.931838	1.18799	1.24394	1.26469	1.28695	1.32059	1.75316	1.79333	1.80701	0.428204	0.428623	0.376824	0.347227	6.46356	4.40367	3.79108	3.5196	3.16179	2.88849	2.3992	1.99614	1.62674	1.33634	1.25918	0.847439	0.843873	0.850947	0.860312	0.914025	0.1269	0.133457	0.135846	0.140554	0.137469	0.169052	0.175855	0.182261	0.183626	0.18039	0.189763	0.192902	0.192274	0.18006	0.177512
0.013557	0.0160563	0.0150605	0.068688	0.316566	0.78724	0.859397	1.11886	1.17232	1.21205	1.21167	1.25642	1.80094	1.83181	1.86097	0.453138	0.454002	0.401007	0.368699	6.86001	4.66701	4.03196	3.74417	3.35869	3.07274	2.56234	2.12317	1.73639	1.41862	1.33837	0.898501	0.898257	0.900764	0.914025	0.963494	0.136379	0.141656	0.140504	0.147066	0.14048	0.176667	0.189676	0.196055	0.195044	0.190594	0.203781	0.199724	0.200328	0.186041	0.183654
0.0120403	0.00949264	0.00919276	0.0504746	0.210283	0.544127	0.601749	0.801066	0.835598	0.857506	0.859991	0.900598	1.28698	1.3124	1.33085	0.44343	0.451782	0.398919	0.36274	0.77366	0.534488	0.458714	0.427013	0.384607	0.354576	0.309683	0.260186	0.218429	0.182153	0.169527	0.126259	0.124789	0.125379	0.1269	0.136379	0.0311569	0.034259	0.0352717	0.0358984	0.0373053	0.0423933	0.0428365	0.0420478	0.0442589	0.0425666	0.0462939	0.0481167	0.0500225	0.0435348	0.0471153
0.0111653	0.0112548	0.00985218	0.0584721	0.243123	0.595724	0.658562	0.7914	0.836873	0.847466	0.862067	0.895839	1.41262	1.44932	1.46665	0.460494	0.462212	0.400081	0.368478	0.819131	0.567732	0.483627	0.454688	0.407905	0.370716	0.32421	0.275519	0.23367	0.190267	0.186127	0.129889	0.139032	0.132332	0.133457	0.141656	0.034259	0.0382477	0.0388202	0.0393147	0.0409808	0.0458172	0.0457121	0.0489017	0.0453374	0.0462363	0.0549032	0.0531961	0.0499091	0.047451	0.0473895
0.0129472	0.00991281	0.0108338	0.0568079	0.236302	0.622822	0.669341	0.880847	0.912252	0.92279	0.936564	0.977863	1.32287	1.35753	1.36444	0.464789	0.466811	0.408011	0.376575	0.820629	0.56655	0.48564	0.452493	0.408693	0.37088	0.328368	0.276358	0.233564	0.19291	0.183845	0.135498	0.134412	0.136098	0.135846	0.140504	0.0352717	0.0388202	0.0365065	0.0378146	0.0409203	0.0451106	0.0462682	0.0448379	0.0461901	0.0453893	0.0546329	0.0514055	0.0505495	0.04899	0.0470954
0.0140857	0.0105194	0.0110421	0.0620675	0.250239	0.617143	0.687539	0.878756	0.917556	0.938634	0.958153	0.991493	1.45845	1.48334	1.50385	0.453411	0.450797	0.395186	0.366024	0.845695	0.580572	0.499635	0.461586	0.419859	0.384218	0.338766	0.284964	0.241509	0.202671	0.193387	0.138553	0.137501	0.141096	0.140554	0.147066	0.0358984	0.0393147	0.0378146	0.0380217	0.0418905	0.0447803	0.0493563	0.0495741	0.0491931	0.0471202	0.0532243	0.0542025	0.0539105	0.050167	0.0505365
0.0138481	0.011166	0.0112954	0.0621124	0.239748	0.629281	0.696251	0.903019	0.950404	0.97145	0.986602	1.01149	1.47547	1.50744	1.51486	0.533668	0.540248	0.471149	0.435559	0.804275	0.552734	0.481456	0.444112	0.399387	0.366497	0.322549	0.267401	0.229415	0.189525	0.181941	0.134652	0.13226	0.133863	0.137469	0.14048	0.0373053	0.0409808	0.0409203	0.0418905	0.0412757	0.0478209	0.0477086	0.0479306	0.047863	0.0447226	0.0524336	0.0536286	0.0529802	0.0497329	0.0522502
0.0122857	0.0122246	0.0135449	0.0609656	0.26566	0.664626	0.73892	0.988273	1.0333	1.04008	1.06897	1.10696	1.51882	1.55465	1.56936	0.478179	0.47777	0.415409	0.384639	1.0594	0.726539	0.623661	0.587005	0.526131	0.482262	0.419965	0.352697	0.292491	0.24138	0.234178	0.165494	0.165676	0.17109	0.169052	0.176667	0.0423933	0.0458172	0.0451106	0.0447803	0.0478209	0.0529363	0.05552	0.0535231	0.0538409	0.0566091	0.0623749	0.0632641	0.0615945	0.0616429	0.057845
0.0126218	0.0131623	0.0117637	0.0576378	0.253338	0.657849	0.70271	1.02031	1.08027	1.0938	1.09441	1.14743	1.50718	1.54089	1.56324	0.473116	0.47281	0.417248	0.378498	1.14773	0.781464	0.670174	0.625447	0.56944	0.514108	0.439978	0.374845	0.310421	0.259596	0.248067	0.176846	0.181005	0.176428	0.175855	0.189676	0.0428365	0.0457121	0.0462682	0.0493563	0.0477086	0.05552	0.0553488	0.0561787	0.0589093	0.0559905	0.0656292	0.0645428	0.0634662	0.0571344	0.0588687
0.0119908	0.00849029	0.012981	0.0530851	0.25485	0.635165	0.691638	0.985227	1.02363	1.05523	1.07466	1.09417	1.49291	1.53355	1.5437	0.571206	0.573732	0.504727	0.466086	1.161	0.800941	0.694046	0.645017	0.577309	0.528484	0.460117	0.380793	0.31818	0.263392	0.251223	0.181877	0.178955	0.181494	0.182261	0.196055	0.0420478	0.0489017	0.0448379	0.0495741	0.0479306	0.0535231	0.0561787	0.0573709	0.0571563	0.0564017	0.0631953	0.0652104	0.062276	0.0583105	0.0612462
0.0114527	0.0110115	0.0129228	0.0608386	0.254132	0.65179	0.724224	1.01766	1.04977	1.05701	1.07383	1.12165	1.48999	1.51163	1.53012	0.534173	0.533598	0.467528	0.431578	1.17304	0.802227	0.694581	0.646432	0.58071	0.531299	0.459253	0.385343	0.315584	0.268293	0.25249	0.178788	0.177655	0.179865	0.183626	0.195044	0.0442589	0.0453374	0.0461901	0.0491931	0.047863	0.0538409	0.0589093	0.0571563	0.0543837	0.0583552	0.0660404	0.0640933	0.0627105	0.0586695	0.0603935
0.0123836	0.00950487	0.0129039	0.0545968	0.239149	0.612235	0.692093	0.970121	1.01413	1.00899	1.04038	1.06885	1.49159	1.51665	1.5431	0.565893	0.569133	0.494573	0.461415	1.13604	0.774622	0.670886	0.624668	0.562456	0.517738	0.447022	0.372042	0.311737	0.25474	0.246682	0.17426	0.175373	0.175146	0.18039	0.190594	0.0425666	0.0462363	0.0453893	0.0471202	0.0447226	0.0566091	0.0559905	0.0564017	0.0583552	0.0536137	0.0640693	0.0644262	0.060553	0.0603225	0.0577247
0.0130342	0.0154457	0.0109886	0.0624243	0.26836	0.683633	0.767364	1.31336	1.3819	1.40301	1.41154	1.47169	1.66245	1.70416	1.71917	0.581485	0.583945	0.510451	0.470476	1.18421	0.811982	0.703921	0.656595	0.593513	0.54059	0.469844	0.392041	0.33315	0.282037	0.267392	0.191783	0.190948	0.190699	0.189763	0.203781	0.0462939	0.0549032	0.0546329	0.0532243	0.0524336	0.0623749	0.0656292	0.0631953	0.0660404	0.0640693	0.0704624	0.0714871	0.0714701	0.0658384	0.0702808
0.01306	0.0131074	0.0135413	0.0637791	0.274546	0.695045	0.763308	1.32984	1.37163	1.40884	1.43497	1.47461	1.73449	1.77543	1.80039	0.571188	0.572902	0.501737	0.470511	1.18722	0.813775	0.699772	0.648329	0.585285	0.538851	0.462441	0.390945	0.329376	0.271832	0.263452	0.1894	0.188633	0.190451	0.192902	0.199724	0.0481167	0.0531961	0.0514055	0.0542025	0.0536286	0.0632641	0.0645428	0.0652104	0.0640933	0.0644262	0.0714871	0.0748468	0.071861	0.0673554	0.0683477
0.00951179	0.0109174	0.0131299	0.0571563	0.24031	0.579182	0.643432	1.22417	1.27534	1.28931	1.29668	1.35105	1.64002	1.68637	1.69584	0.617637	0.623745	0.542857	0.500426	1.18231	0.814044	0.696226	0.641925	0.587218	0.534916	0.463594	0.391652	0.322671	0.27152	0.259365	0.187697	0.183159	0.186857	0.192274	0.200328	0.0500225	0.0499091	0.0505495	0.0539105	0.0529802	0.0615945	0.0634662	0.062276	0.0627105	0.060553	0.0714701	0.071861	0.0666981	0.0661422	0.0641815
0.00972225	0.0132074	0.0156495	0.0675737	0.259076	0.690493	0.755492	1.11769	1.18268	1.19209	1.20305	1.24639	1.57963	1.61115	1.63611	0.565366	0.573654	0.49841	0.465058	1.12477	0.771641	0.666729	0.622199	0.55772	0.516895	0.447027	0.375204	0.311534	0.262272	0.251733	0.179298	0.180003	0.177712	0.18006	0.186041	0.0435348	0.047451	0.04899	0.050167	0.0497329	0.0616429	0.0571344	0.0583105	0.0586695	0.0603225	0.0658384	0.0673554	0.0661422	0.0596855	0.0635348
0.0107562	0.0134105	0.0102867	0.0512713	0.227454	0.572332	0.606799	1.2223	1.27672	1.29346	1.30905	1.36011	1.64422	1.68884	1.70887	0.527093	0.527858	0.465813	0.427764	1.07924	0.739403	0.638635	0.594764	0.537465	0.485651	0.425595	0.356397	0.303064	0.249902	0.242418	0.17449	0.174982	0.174476	0.177512	0.183654	0.0471153	0.0473895	0.0470954	0.0505365	0.0522502	0.057845	0.0588687	0.0612462	0.0603935	0.0577247	0.0702808	0.0683477	0.0641815	0.0635348	0.0642767
0.0106463	0.0138626	0.0133785	0.054509	0.253694	0.657733	0.718493	1.55927	1.61518	1.65215	1.67361	1.73569	2.09182	2.13068	2.16728	0.605896	0.60955	0.538338	0.497398	1.17499	0.810197	0.70191	0.646976	0.592699	0.53479	0.474469	0.39681	0.333331	0.283595	0.270303	0.196203	0.199651	0.195656	0.19964	0.208942	0.0522208	0.0597298	0.0579114	0.0615431	0.0623745	0.0648736	0.0712993	0.0704017	0.0701396	0.0687099	0.0817363	0.0834181	0.0780163	0.0752122	0.0748136
0.0164162	0.00971631	0.01109	0.0594887	0.248393	0.635018	0.684328	1.48264	1.55004	1.56762	1.59815	1.63708	2.04197	2.09149	2.12221	0.556467	0.562953	0.493832	0.445412	1.09456	0.742597	0.645187	0.601517	0.540007	0.491109	0.436299	0.371174	0.309438	0.264176	0.252782	0.182888	0.182912	0.179729	0.18276	0.197465	0.050518	0.0545955	0.0543789	0.0583855	0.0577217	0.0631787	0.0693573	0.0668385	0.0656294	0.0655502	0.0732628	0.0792233	0.075328	0.0688282	0.0716454
0.0149013	0.010961	0.0122849	0.0548743	0.26462	0.691313	0.74709	1.35821	1.41135	1.45911	1.44873	1.51278	1.83992	1.88521	1.90342	0.595485	0.600999	0.52287	0.481862	1.02357	0.698644	0.605487	0.561637	0.50862	0.46576	0.406136	0.348106	0.294178	0.242204	0.235872	0.169078	0.171789	0.171357	0.175145	0.184842	0.0445663	0.0528358	0.0529982	0.0546821	0.0530743	0.0608737	0.06241	0.0616397	0.0613212	0.0594731	0.0707454	0.0693408	0.070831	0.0646969	0.0670221
0.00981585	0.0104215	0.0120477	0.0481204	0.220085	0.572161	0.603872	1.37379	1.46376	1.47844	1.49397	1.52391	1.65806	1.68796	1.71742	0.568053	0.571853	0.502209	0.462473	0.949261	0.653357	0.566019	0.526126	0.47126	0.434675	0.378381	0.319751	0.270205	0.231434	0.214119	0.161451	0.156974	0.157147	0.165114	0.169305	0.0460123	0.0481717	0.047132	0.0509754	0.0512496	0.0563477	0.0575936	0.059055	0.0642457	0.0593225	0.0654364	0.0669069	0.0652058	0.0613577	0.0610894
0.0119725	0.0119364	0.0115365	0.0600046	0.242206	0.616572	0.656684	1.24588	1.29375	1.32253	1.34274	1.38195	1.72777	1.76597	1.7893	0.535591	0.537491	0.468769	0.438343	0.985094	0.675831	0.584564	0.551064	0.495992	0.452202	0.39457	0.342578	0.282034	0.238658	0.228273	0.161955	0.163993	0.164013	0.169342	0.171366	0.0453845	0.0469074	0.0491762	0.0503873	0.0530149	0.0594833	0.0582991	0.0559953	0.0603029	0.0560609	0.0668514	0.0664244	0.064545	0.0628138	0.0633201
0.0103384	0.00649104	0.00673167	0.0403041	0.17255	0.450447	0.509994	1.03782	1.09129	1.10815	1.12555	1.1656	1.7093	1.74254	1.76057	0.504733	0.507776	0.444368	0.414302	0.831094	0.56776	0.496729	0.457759	0.415545	0.379412	0.332384	0.282495	0.237151	0.206053	0.190243	0.140216	0.139409	0.141265	0.143121	0.148575	0.039566	0.0448633	0.0429759	0.0448382	0.0432897	0.0493621	0.0503112	0.052108	0.0523919	0.051905	0.0586784	0.0592248	0.0558877	0.0522073	0.053623
0.00958065	0.0102459	0.00797837	0.039455	0.179604	0.464943	0.503639	1.06529	1.12045	1.12644	1.14721	1.18639	1.57791	1.60461	1.62528	0.479569	0.481004	0.423549	0.39088	0.78944	0.542619	0.471478	0.439677	0.397658	0.365013	0.317821	0.269625	0.225346	0.190907	0.186212	0.13321	0.138505	0.133957	0.137966	0.142398	0.0396362	0.0399849	0.0411084	0.0453224	0.0446223	0.0498361	0.0503257	0.0498395	0.0510873	0.0473216	0.0591833	0.0571707	0.0521248	0.0510727	0.052286
0.00655717	0.0085286	0.00814101	0.0365969	0.157648	0.41794	0.460128	1.06106	1.10643	1.11868	1.12998	1.185	1.56977	1.60754	1.62504	0.472684	0.480095	0.420764	0.387547	0.795806	0.548019	0.474604	0.445644	0.404692	0.366596	0.322811	0.276577	0.234515	0.192556	0.184149	0.135445	0.139153	0.133824	0.137961	0.144966	0.0390903	0.0413458	0.0391743	0.043257	0.0448378	0.0468041	0.0497347	0.0476901	0.0509148	0.0496493	0.0585072	0.0573405	0.0540398	0.0507497	0.0521644
0.00820972	0.00952011	0.00725869	0.032353	0.153932	0.385407	0.434911	1.02442	1.06131	1.07759	1.10073	1.13141	1.46046	1.49956	1.51927	0.461819	0.461704	0.405115	0.375028	0.731487	0.507126	0.443063	0.406556	0.367706	0.33855	0.295489	0.248703	0.209532	0.180554	0.171031	0.125511	0.125162	0.127397	0.130178	0.130018	0.0376495	0.0397943	0.0388241	0.0401291	0.0386127	0.0453441	0.0451134	0.0470207	0.0457213	0.0464241	0.0514807	0.0517995	0.0490964	0.0483769	0.0492827
0.00701595	0.00810601	0.00798948	0.0466278	0.163784	0.442407	0.478745	0.952656	1.00276	1.00377	1.02993	1.06135	1.45844	1.49768	1.5239	0.44778	0.452226	0.39383	0.364966	0.742729	0.514516	0.438821	0.407891	0.373139	0.338225	0.298101	0.25503	0.209791	0.179451	0.172996	0.121998	0.127966	0.121376	0.126925	0.133242	0.0353139	0.0389221	0.0388152	0.0402169	0.037068	0.0468447	0.0477114	0.0463357	0.0459089	0.0452615	0.0519854	0.0526378	0.0515196	0.0479507	0.0490466
0.0033809	0.00316145	0.00435339	0.0107945	0.0592056	0.138107	0.157615	0.41077	0.432098	0.438711	0.452455	0.473185	0.837979	0.855243	0.863556	0.321416	0.317427	0.278537	0.257228	0.722912	0.493261	0.428731	0.390024	0.357339	0.328579	0.280894	0.233071	0.19154	0.159581	0.15427	0.102873	0.109028	0.105413	0.107757	0.114562	0.0235288	0.026348	0.0250155	0.0267804	0.0246512	0.0286284	0.0314957	0.0326049	0.0295591	0.0312002	0.0347369	0.0345503	0.0333663	0.0318526	0.0307045
0.00130918	0.00269103	0.0033741	0.0117846	0.0498186	0.122899	0.143542	0.339403	0.3452	0.359655	0.354178	0.369988	0.710691	0.728764	0.741757	0.32093	0.316901	0.280584	0.26307	0.659985	0.451567	0.39398	0.360559	0.325989	0.30144	0.2534	0.214655	0.172233	0.14183	0.139405	0.0953414	0.0965639	0.0962388	0.0961714	0.104435	0.0196328	0.0220528	0.0215228	0.0232317	0.0224787	0.0258928	0.0271193	0.0268513	0.0285021	0.0285896	0.0311601	0.0311343	0.0307215	0.027785	0.0302947
0.00348308	0.00198274	0.0043571	0.0112711	0.0623833	0.142166	0.149224	0.355246	0.362822	0.38459	0.382458	0.396974	0.701469	0.719994	0.726344	0.271793	0.272999	0.239633	0.221481	0.607666	0.421686	0.361778	0.334906	0.300186	0.275205	0.23571	0.193971	0.161947	0.132301	0.126971	0.0882922	0.0903717	0.0901732	0.0910885	0.0997019	0.0207354	0.0222605	0.0212639	0.022271	0.0215338	0.0252673	0.0258374	0.0269201	0.0264116	0.026758	0.0297774	0.0291919	0.0287512	0.0266001	0.0269139
0.000600992	0.000752011	0.00142884	0.00601197	0.0225016	0.0687346	0.0770785	0.255854	0.271094	0.267266	0.275115	0.280222	0.510897	0.517765	0.526786	0.216336	0.217776	0.187526	0.172768	0.436661	0.297553	0.257619	0.237607	0.216359	0.195462	0.167009	0.143579	0.117974	0.0954984	0.091012	0.064805	0.0644119	0.0646352	0.0649686	0.0695263	0.0144213	0.0143309	0.0142779	0.0150349	0.0159305	0.0178298	0.0192906	0.019038	0.0183553	0.0200692	0.0202738	0.0214254	0.020463	0.0189299	0.0190106
0.00136836	0.00163067	0.00161579	0.00616994	0.0302949	0.0702576	0.0812254	0.210753	0.220636	0.222741	0.225707	0.232136	0.392672	0.396124	0.405984	0.166782	0.165589	0.146099	0.134613	0.352269	0.242465	0.207669	0.192917	0.174193	0.160836	0.135496	0.109846	0.0929172	0.076331	0.0758143	0.0518383	0.0522651	0.0516606	0.0523302	0.0551726	0.0121768	0.0125538	0.0127868	0.0128925	0.0124299	0.0142398	0.0142528	0.015312	0.015642	0.0146362	0.0159588	0.0155365	0.0170767	0.0153244	0.0151061
0.000380564	0.000190279	0.000190279	0.000190279	0.00171254	0.00513761	0.00456676	0.00247197	0.00223238	0.00216464	0.00294368	0.00260683	0.031026	0.0317098	0.0312969	0.00345774	0.00329308	0.00321645	0.00279016	0.26472	0.180321	0.150326	0.142667	0.130485	0.117988	0.0955843	0.0816648	0.065808	0.0546168	0.051231	0.0342555	0.0331886	0.032086	0.0336583	0.0366591	0.00390603	0.00447378	0.00453314	0.00469836	0.00417995	0.00627154	0.00686186	0.00579569	0.00641487	0.006242	0.00586906	0.00686255	0.00665499	0.00611359	0.00577108
0	0	0.000221993	0.000166496	0.00221995	0.00443991	0.00593837	0.0065395	0.00741941	0.00701503	0.00756677	0.00790474	0.0233019	0.0229562	0.024874	0.0121718	0.0123681	0.0109258	0.00968344	0.197949	0.13637	0.116241	0.107233	0.0965756	0.0903465	0.073818	0.0604658	0.0494182	0.0389741	0.0375956	0.0235199	0.0253132	0.0252925	0.0261681	0.0262895	0.00305059	0.00372454	0.00317168	0.00390912	0.00361871	0.00477231	0.00453919	0.00491504	0.00471152	0.0047867	0.00473879	0.00536156	0.00470004	0.00440014	0.00443096
0	0	0	0.000733943	0.00152225	0.00356098	0.00652394	0.00713004	0.0080086	0.00689872	0.00646561	0.00736324	0.0188947	0.0198263	0.0201315	0.003655	0.00321666	0.00308726	0.00305838	0.150207	0.101989	0.0876548	0.0835305	0.074176	0.067346	0.055529	0.0452771	0.0366713	0.0313474	0.0300904	0.0191468	0.0190576	0.0190754	0.0181595	0.0190359	0.0022317	0.00274214	0.00261383	0.00273505	0.00281917	0.00336346	0.00413803	0.0038049	0.00383698	0.0037332	0.00419007	0.00322405	0.00316492	0.00406172	0.00385561
0.00023785	0.000475707	0	0.00023785	0.00261637	0.00673914	0.00840411	0.00817098	0.00831047	0.00899604	0.00814801	0.00861191	0.0132573	0.0138148	0.0140596	0.0053287	0.0050821	0.00474188	0.00427194	0.142489	0.0965675	0.0835807	0.0776409	0.0693956	0.0636654	0.0514479	0.043077	0.0348892	0.0275906	0.0273495	0.0181248	0.0181319	0.0177478	0.0180222	0.0194266	0.00270519	0.00252273	0.00250734	0.00283517	0.00262787	0.0032945	0.00346321	0.00359835	0.00367351	0.00335022	0.00411286	0.00305362	0.00376422	0.00348843	0.00372758
0	0	0	0	0	0	0	0.00478748	0.00511079	0.00482042	0.00481144	0.00497758	0.00800344	0.00787928	0.00774526	0.00702502	0.00714664	0.0063856	0.00523258	0.110924	0.0746662	0.0661407	0.0600105	0.0517157	0.0495047	0.0411985	0.0332652	0.0286048	0.0228362	0.0220566	0.0128874	0.0147755	0.014681	0.0139421	0.0152372	0.00174733	0.00191979	0.00207362	0.00227174	0.00172799	0.00235168	0.00231579	0.00261999	0.00275681	0.00258825	0.00298477	0.00248664	0.00226913	0.00272783	0.00246537
0	0	0	0	0	0	0	0	0	0	0	0	0	0	0	0	0	0	0	0	0	0	0	0	0	0	0	0	0	0	0	0	0	0	0	0	0	0	0	0	0	0	0	0	0	0	0	0	0	0
0	0	0	0	0	0	0	0	0	0	0	0	0	0	0	0	0	0	0	0	0	0	0	0	0	0	0	0	0	0	0	0	0	0	0	0	0	0	0	0	0	0	0	0	0	0	0	0	0	0
0	0	0	0	0	0	0	0	0	0	0	0	0	0	0	0	0	0	0	0	0	0	0	0	0	0	0	0	0	0	0	0	0	0	0	0	0	0	0	0	0	0	0	0	0	0	0	0	0	0
0	0	0	0	0	0	0	0	0	0	0	0	0	0	0	0	0	0	0	0	0	0	0	0	0	0	0	0	0	0	0	0	0	0	0	0	0	0	0	0	0	0	0	0	0	0	0	0	0	0
0	0	0	0	0	0	0	0	0	0	0	0	0	0	0	0	0	0	0	0	0	0	0	0	0	0	0	0	0	0	0	0	0	0	0	0	0	0	0	0	0	0	0	0	0	0	0	0	0	0
0	0	0	0	0	0	0	0	0	0	0	0	0	0	0	0	0	0	0	0	0	0	0	0	0	0	0	0	0	0	0	0	0	0	0	0	0	0	0	0	0	0	0	0	0	0	0	0	0	0
0	0	0	0	0	0	0	0	0	0	0	0	0	0	0	0	0	0	0	0	0	0	0	0	0	0	0	0	0	0	0	0	0	0	0	0	0	0	0	0	0	0	0	0	0	0	0	0	0	0
0	0	0	0	0	0	0	0	0	0	0	0	0	0	0	0	0	0	0	0	0	0	0	0	0	0	0	0	0	0	0	0	0	0	0	0	0	0	0	0	0	0	0	0	0	0	0	0	0	0
0	0	0	0	0	0	0	0	0	0	0	0	0	0	0	0	0	0	0	0	0	0	0	0	0	0	0	0	0	0	0	0	0	0	0	0	0	0	0	0	0	0	0	0	0	0	0	0	0	0
0	0	0	0	0	0	0	0	0	0	0	0	0	0	0	0	0	0	0	0	0	0	0	0	0	0	0	0	0	0	0	0	0	0	0	0	0	0	0	0	0	0	0	0	0	0	0	0	0	0
0	0	0	0	0	0	0	0	0	0	0	0	0	0	0	0	0	0	0	0	0	0	0	0	0	0	0	0	0	0	0	0	0	0	0	0	0	0	0	0	0	0	0	0	0	0	0	0	0	0
0	0	0	0	0	0	0	0	0	0	0	0	0	0	0	0	0	0	0	0	0	0	0	0	0	0	0	0	0	0	0	0	0	0	0	0	0	0	0	0	0	0	0	0	0	0	0	0	0	0
0	0	0	0	0	0	0	0	0	0	0	0	0	0	0	0	0	0	0	0	0	0	0	0	0	0	0	0	0	0	0	0	0	0	0	0	0	0	0	0	0	0	0	0	0	0	0	0	0	0
0	0	0	0	0	0	0	0	0	0	0	0	0	0	0	0	0	0	0	0	0	0	0	0	0	0	0	0	0	0	0	0	0	0	0	0	0	0	0	0	0	0	0	0	0	0	0	0	0	0
0	0	0	0	0	0	0	0	0	0	0	0	0	0	0	0	0	0	0	0	0	0	0	0	0	0	0	0	0	0	0	0	0	0	0	0	0	0	0	0	0	0	0	0	0	0	0	0	0	0
0	0	0	0	0	0	0	0	0	0	0	0	0	0	0	0	0	0	0	0	0	0	0	0	0	0	0	0	0	0	0	0	0	0	0	0	0	0	0	0	0	0	0	0	0	0	0	0	0	0
0	0	0	0	0	0	0	0	0	0	0	0	0	0	0	0	0	0	0	0	0	0	0	0	0	0	0	0	0	0	0	0	0	0	0	0	0	0	0	0	0	0	0	0	0	0	0	0	0	0
0	0	0	0	0	0	0	0	0	0	0	0	0	0	0	0	0	0	0	0	0	0	0	0	0	0	0	0	0	0	0	0	0	0	0	0	0	0	0	0	0	0	0	0	0	0	0	0	0	0
0	0	0	0	0	0	0	0	0	0	0	0	0	0	0	0	0	0	0	0	0	0	0	0	0	0	0	0	0	0	0	0	0	0	0	0	0	0	0	0	0	0	0	0	0	0	0	0	0	0
0	0	0	0	0	0	0	0	0	0	0	0	0	0	0	0	0	0	0	0	0	0	0	0	0	0	0	0	0	0	0	0	0	0	0	0	0	0	0	0	0	0	0	0	0	0	0	0	0	0
0	0	0	0	0	0	0	0	0	0	0	0	0	0	0	0	0	0	0	0	0	0	0	0	0	0	0	0	0	0	0	0	0	0	0	0	0	0	0	0	0	0	0	0	0	0	0	0	0	0
0	0	0	0	0	0	0	0	0	0	0	0	0	0	0	0	0	0	0	0	0	0	0	0	0	0	0	0	0	0	0	0	0	0	0	0	0	0	0	0	0	0	0	0	0	0	0	0	0	0
0	0	0	0	0	0	0	0	0	0	0	0	0	0	0	0	0	0	0	0	0	0	0	0	0	0	0	0	0	0	0	0	0	0	0	0	0	0	0	0	0	0	0	0	0	0	0	0	0	0
0	0	0	0	0	0	0	0	0	0	0	0	0	0	0	0	0	0	0	0	0	0	0	0	0	0	0	0	0	0	0	0	0	0	0	0	0	0	0	0	0	0	0	0	0	0	0	0	0	0
0	0	0	0	0	0	0	0	0	0	0	0	0	0	0	0	0	0	0	0	0	0	0	0	0	0	0	0	0	0	0	0	0	0	0	0	0	0	0	0	0	0	0	0	0	0	0	0	0	0
0	0	0	0	0	0	0	0	0	0	0	0	0	0	0	0	0	0	0	0	0	0	0	0	0	0	0	0	0	0	0	0	0	0	0	0	0	0	0	0	0	0	0	0	0	0	0	0	0	0
0	0	0	0	0	0	0	0	0	0	0	0	0	0	0	0	0	0	0	0	0	0	0	0	0	0	0	0	0	0	0	0	0	0	0	0	0	0	0	0	0	0	0	0	0	0	0	0	0	0
0	0	0	0	0	0	0	0	0	0	0	0	0	0	0	0	0	0	0	0	0	0	0	0	0	0	0	0	0	0	0	0	0	0	0	0	0	0	0	0	0	0	0	0	0	0	0	0	0	0
0	0	0	0	0	0	0	0	0	0	0	0	0	0	0	0	0	0	0	0	0	0	0	0	0	0	0	0	0	0	0	0	0	0	0	0	0	0	0	0	0	0	0	0	0	0	0	0	0	0
Workplace
0	0	0	0	0	0	0	0	0	0	0	0	0	0	0	0	0	0	0	0	0	0	0	0	0	0	0	0	0	0	0	0	0	0	0	0	0	0	0	0	0	0	0	0	0	0	0	0	0	0
0	0	0	0	0	0	0	0	0	0	0	0	0	0	0	0	0	0	0	0	0	0	0	0	0	0	0	0	0	0	0	0	0	0	0	0	0	0	0	0	0	0	0	0	0	0	0	0	0	0
0	0	0	0	0	0	0	0	0	0	0	0	0	0	0	0	0	0	0	0	0	0	0	0	0	0	0	0	0	0	0	0	0	0	0	0	0	0	0	0	0	0	0	0	0	0	0	0	0	0
0	0	0	0	0	0	0	0	0	0	0	0	0	0	0	0	0	0	0	0	0	0	0	0	0	0	0	0	0	0	0	0	0	0	0	0	0	0	0	0	0	0	0	0	0	0	0	0	0	0
0	0	0	0	0	0	0	0	0	0	0	0	0	0	0	0	0	0	0	0	0	0	0	0	0	0	0	0	0	0	0	0	0	0	0	0	0	0	0	0	0	0	0	0	0	0	0	0	0	0
0	0	0	0	0	0	0	0	0	0	0	0	0	0	0	0	0	0	0	0	0	0	0	0	0	0	0	0	0	0	0	0	0	0	0	0	0	0	0	0	0	0	0	0	0	0	0	0	0	0
0	0	0	0	0	0	0	0	0	0	0	0	0	0	0	0	0	0	0	0	0	0	0	0	0	0	0	0	0	0	0	0	0	0	0	0	0	0	0	0	0	0	0	0	0	0	0	0	0	0
0	0	0	0	0	0	0	0	0	0	0	0	0	0	0	0	0	0	0	0	0	0	0	0	0	0	0	0	0	0	0	0	0	0	0	0	0	0	0	0	0	0	0	0	0	0	0	0	0	0
0	0	0	0	0	0	0	0	0	0	0	0	0	0	0	0	0	0	0	0	0	0	0	0	0	0	0	0	0	0	0	0	0	0	0	0	0	0	0	0	0	0	0	0	0	0	0	0	0	0
0	0	0	0	0	0	0	0	0	0	0	0	0	0	0	0	0	0	0	0	0	0	0	0	0	0	0	0	0	0	0	0	0	0	0	0	0	0	0	0	0	0	0	0	0	0	0	0	0	0
0	0	0	0	0	0	0	0	0	0	0	0	0	0	0	0	0	0	0	0	0	0	0	0	0	0	0	0	0	0	0	0	0	0	0	0	0	0	0	0	0	0	0	0	0	0	0	0	0	0
0	0	0	0	0	0	0	0	0	0	0	0	0	0	0	0	0	0	0	0	0	0	0	0	0	0	0	0	0	0	0	0	0	0	0	0	0	0	0	0	0	0	0	0	0	0	0	0	0	0
0	0	0	0	0	0	0	0	0	0	0	0	0	0	0	0	0	0	0	0	0	0	0	0	0	0	0	0	0	0	0	0	0	0	0	0	0	0	0	0	0	0	0	0	0	0	0	0	0	0
0	0	0	0	0	0	0	0	0	0	0	0	0	0	0	0	0	0	0	0	0	0	0	0	0	0	0	0	0	0	0	0	0	0	0	0	0	0	0	0	0	0	0	0	0	0	0	0	0	0
0	0	0	0	0	0	0	0	0	0	0	0	0	0	0	0	0	0	0	0	0	0	0	0	0	0	0	0	0	0	0	0	0	0	0	0	0	0	0	0	0	0	0	0	0	0	0	0	0	0
0	0	0	0	0	0	0	0	0	0	0	0	0	0	0	0	0	0	0	0	0	0	0	0	0	0	0	0	0	0	0	0	0	0	0	0	0	0	0	0	0	0	0	0	0	0	0	0	0	0
0	0	0	0	0	0	0	0	0	0	0	0	0	0	0	0	0	0	0	0	0	0	0	0	0	0	0	0	0	0	0	0	0	0	0	0	0	0	0	0	0	0	0	0	0	0	0	0	0	0
0	0	0	0	0	0	0	0	0	0	0	0	0	0	0	0	0	0.0834941	0.130821	0.294571	0.370692	0.427057	0.432071	0.46769	0.482186	0.518698	0.547242	0.570768	0.601286	0.585811	0.63933	0.63192	0.634132	0.63532	0.654929	0.689464	0.746516	0.752843	0.766705	0.78422	0.805991	0.834086	0.825496	0.85184	0.847359	0.792459	0.768138	0.743385	0.737197	0.704322
0	0	0	0	0	0	0	0	0	0	0	0	0	0	0	0	0	0.130821	0.188009	0.443436	0.546081	0.629251	0.647308	0.707964	0.695557	0.756973	0.795691	0.841202	0.864011	0.87497	0.92599	0.931323	0.918306	0.941854	0.948826	1.04278	1.07	1.09362	1.1255	1.16439	1.16786	1.22393	1.21578	1.24526	1.21813	1.17602	1.118	1.12815	1.07052	1.02482
0	0	0	0	0	0	0	0	0	0	0	0	0	0	0	0	0	0.294571	0.443436	1.01038	1.32357	1.46588	1.52156	1.62162	1.65628	1.7894	1.91225	2.01253	2.04817	2.03348	2.222	2.17446	2.17626	2.20975	2.21211	2.45874	2.57936	2.62219	2.70955	2.76005	2.82215	2.88448	2.91696	3.00032	2.92164	2.77816	2.68994	2.63467	2.53766	2.47698
0	0	0	0	0	0	0	0	0	0	0	0	0	0	0	0	0	0.370692	0.546081	1.32357	1.62178	1.8336	1.91289	2.0439	2.1053	2.28974	2.40119	2.53897	2.60837	2.56253	2.7505	2.72301	2.73708	2.80033	2.77441	3.11166	3.25608	3.26865	3.37398	3.51382	3.56643	3.61432	3.64784	3.75237	3.6636	3.53441	3.40232	3.33925	3.21476	3.07708
0	0	0	0	0	0	0	0	0	0	0	0	0	0	0	0	0	0.427057	0.629251	1.46588	1.8336	2.13321	2.14694	2.2763	2.35552	2.58847	2.70762	2.86228	2.90669	2.90522	3.08089	3.0428	3.11054	3.16016	3.16421	3.47799	3.64776	3.69253	3.77279	3.93156	3.99867	4.1107	4.13535	4.26186	4.15211	3.9546	3.84989	3.75125	3.59127	3.46507
0	0	0	0	0	0	0	0	0	0	0	0	0	0	0	0	0	0.432071	0.647308	1.52156	1.91289	2.14694	2.21178	2.3872	2.40509	2.67216	2.80261	2.95479	3.0012	2.98098	3.20055	3.1276	3.19455	3.27556	3.24	3.61309	3.75969	3.79899	3.90943	4.05785	4.08935	4.22442	4.2081	4.36854	4.23047	4.11685	3.99081	3.85848	3.73197	3.59344
0	0	0	0	0	0	0	0	0	0	0	0	0	0	0	0	0	0.46769	0.707964	1.62162	2.0439	2.2763	2.3872	2.55783	2.60784	2.85906	3.0218	3.1383	3.20806	3.19586	3.41543	3.40215	3.42069	3.53705	3.5149	3.88653	4.05408	4.11915	4.20239	4.35967	4.43443	4.57602	4.52779	4.63938	4.62517	4.39594	4.24402	4.12922	4.05596	3.82791
0	0	0	0	0	0	0	0	0	0	0	0	0	0	0	0	0	0.482186	0.695557	1.65628	2.1053	2.35552	2.40509	2.60784	2.67062	2.93156	3.07274	3.21967	3.26846	3.25911	3.45877	3.48336	3.48986	3.55591	3.56557	3.96305	4.16311	4.21915	4.30518	4.44368	4.49511	4.66982	4.6569	4.77	4.69908	4.46174	4.39466	4.23363	4.15328	3.93974
0	0	0	0	0	0	0	0	0	0	0	0	0	0	0	0	0	0.518698	0.756973	1.7894	2.28974	2.58847	2.67216	2.85906	2.93156	3.16823	3.36323	3.55597	3.61703	3.56991	3.78162	3.79992	3.81961	3.91722	3.91228	4.32314	4.52532	4.54519	4.72831	4.85841	4.92527	5.08943	5.07112	5.24859	5.11456	4.91208	4.74324	4.61022	4.50638	4.32709
0	0	0	0	0	0	0	0	0	0	0	0	0	0	0	0	0	0.547242	0.795691	1.91225	2.40119	2.70762	2.80261	3.0218	3.07274	3.36323	3.51017	3.70517	3.8342	3.75887	3.99348	3.96748	4.02368	4.12073	4.10961	4.54555	4.76026	4.80577	4.98431	5.1498	5.21288	5.37041	5.3899	5.51773	5.42024	5.13952	4.9536	4.88962	4.76334	4.56592
0	0	0	0	0	0	0	0	0	0	0	0	0	0	0	0	0	0.570768	0.841202	2.01253	2.53897	2.86228	2.95479	3.1383	3.21967	3.55597	3.70517	3.93401	3.993	3.99233	4.2394	4.23126	4.22572	4.33645	4.33286	4.82459	5.04125	5.05806	5.18381	5.42165	5.47029	5.63903	5.64578	5.77845	5.70016	5.4019	5.23244	5.10277	4.96859	4.79927
0	0	0	0	0	0	0	0	0	0	0	0	0	0	0	0	0	0.601286	0.864011	2.04817	2.60837	2.90669	3.0012	3.20806	3.26846	3.61703	3.8342	3.993	4.0793	4.02724	4.30347	4.30346	4.32277	4.40127	4.4449	4.89374	5.139	5.16871	5.27429	5.48588	5.59509	5.71714	5.71714	5.83773	5.78723	5.54412	5.35387	5.20797	5.04899	4.90006
0	0	0	0	0	0	0	0	0	0	0	0	0	0	0	0	0	0.585811	0.87497	2.03348	2.56253	2.90522	2.98098	3.19586	3.25911	3.56991	3.75887	3.99233	4.02724	4.04266	4.30957	4.27121	4.28323	4.39367	4.39504	4.85375	5.10811	5.14	5.31397	5.43772	5.51632	5.74063	5.71773	5.89455	5.73998	5.43801	5.27056	5.1717	5.06364	4.83643
0	0	0	0	0	0	0	0	0	0	0	0	0	0	0	0	0	0.63933	0.92599	2.222	2.7505	3.08089	3.20055	3.41543	3.45877	3.78162	3.99348	4.2394	4.30347	4.30957	4.51846	4.58921	4.58323	4.67434	4.7012	5.20726	5.41317	5.44461	5.60602	5.81178	5.89353	6.07272	6.03859	6.26289	6.0873	5.80461	5.65633	5.528	5.35824	5.14219
0	0	0	0	0	0	0	0	0	0	0	0	0	0	0	0	0	0.63192	0.931323	2.17446	2.72301	3.0428	3.1276	3.40215	3.48336	3.79992	3.96748	4.23126	4.30346	4.27121	4.58921	4.55209	4.5243	4.6477	4.69139	5.13958	5.40354	5.44185	5.57652	5.80836	5.86908	6.08457	6.05527	6.22012	6.12458	5.83498	5.65062	5.55591	5.38671	5.12756
0	0	0	0	0	0	0	0	0	0	0	0	0	0	0	0	0	0.634132	0.918306	2.17626	2.73708	3.11054	3.19455	3.42069	3.48986	3.81961	4.02368	4.22572	4.32277	4.28323	4.58323	4.5243	4.58588	4.62251	4.68273	5.10932	5.43097	5.46953	5.64398	5.83007	5.88941	6.06776	6.08409	6.26452	6.12745	5.85629	5.6658	5.55057	5.34081	5.16701
0	0	0	0	0	0	0	0	0	0	0	0	0	0	0	0	0	0.63532	0.941854	2.20975	2.80033	3.16016	3.27556	3.53705	3.55591	3.91722	4.12073	4.33645	4.40127	4.39367	4.67434	4.6477	4.62251	4.73317	4.78884	5.31305	5.55445	5.59652	5.74451	5.96923	6.03349	6.22197	6.26775	6.41433	6.27331	5.99774	5.79145	5.69713	5.53803	5.3066
0	0	0	0	0	0	0	0	0	0	0	0	0	0	0	0	0	0.654929	0.948826	2.21211	2.77441	3.16421	3.24	3.5149	3.56557	3.91228	4.10961	4.33286	4.4449	4.39504	4.7012	4.69139	4.68273	4.78884	4.76483	5.29713	5.57563	5.61832	5.73396	5.93322	6.08156	6.23448	6.24424	6.41979	6.26467	6.05037	5.84831	5.67362	5.5033	5.33712
0	0	0	0	0	0	0	0	0	0	0	0	0	0	0	0	0	0.689464	1.04278	2.45874	3.11166	3.47799	3.61309	3.88653	3.96305	4.32314	4.54555	4.82459	4.89374	4.85375	5.20726	5.13958	5.10932	5.31305	5.29713	5.85924	6.145	6.206	6.42294	6.63686	6.65223	6.87528	6.92645	7.08804	6.95675	6.61404	6.40291	6.29857	6.09781	5.86891
0	0	0	0	0	0	0	0	0	0	0	0	0	0	0	0	0	0.746516	1.07	2.57936	3.25608	3.64776	3.75969	4.05408	4.16311	4.52532	4.76026	5.04125	5.139	5.10811	5.41317	5.40354	5.43097	5.55445	5.57563	6.145	6.38078	6.50047	6.67786	6.89864	6.96132	7.1736	7.2332	7.44347	7.27149	6.96463	6.72256	6.61404	6.37947	6.11082
0	0	0	0	0	0	0	0	0	0	0	0	0	0	0	0	0	0.752843	1.09362	2.62219	3.26865	3.69253	3.79899	4.11915	4.21915	4.54519	4.80577	5.05806	5.16871	5.14	5.44461	5.44185	5.46953	5.59652	5.61832	6.206	6.50047	6.54614	6.74541	6.99773	7.05503	7.27269	7.31022	7.51642	7.30145	7.04859	6.839	6.64207	6.43438	6.19733
0	0	0	0	0	0	0	0	0	0	0	0	0	0	0	0	0	0.766705	1.1255	2.70955	3.37398	3.77279	3.90943	4.20239	4.30518	4.72831	4.98431	5.18381	5.27429	5.31397	5.60602	5.57652	5.64398	5.74451	5.73396	6.42294	6.67786	6.74541	6.92534	7.18059	7.26244	7.52024	7.50675	7.69502	7.59857	7.20255	7.02255	6.84302	6.57582	6.3521
0	0	0	0	0	0	0	0	0	0	0	0	0	0	0	0	0	0.78422	1.16439	2.76005	3.51382	3.93156	4.05785	4.35967	4.44368	4.85841	5.1498	5.42165	5.48588	5.43772	5.81178	5.80836	5.83007	5.96923	5.93322	6.63686	6.89864	6.99773	7.18059	7.40454	7.48528	7.75407	7.7166	7.99846	7.78203	7.47972	7.26209	7.05554	6.80535	6.5451
0	0	0	0	0	0	0	0	0	0	0	0	0	0	0	0	0	0.805991	1.16786	2.82215	3.56643	3.99867	4.08935	4.43443	4.49511	4.92527	5.21288	5.47029	5.59509	5.51632	5.89353	5.86908	5.88941	6.03349	6.08156	6.65223	6.96132	7.05503	7.26244	7.48528	7.56135	7.8336	7.87274	8.03401	7.87053	7.49703	7.32003	7.17007	6.96536	6.69659
0	0	0	0	0	0	0	0	0	0	0	0	0	0	0	0	0	0.834086	1.22393	2.88448	3.61432	4.1107	4.22442	4.57602	4.66982	5.08943	5.37041	5.63903	5.71714	5.74063	6.07272	6.08457	6.06776	6.22197	6.23448	6.87528	7.1736	7.27269	7.52024	7.75407	7.8336	8.08687	8.10932	8.33027	8.14134	7.77162	7.55718	7.39845	7.11829	6.86532
0	0	0	0	0	0	0	0	0	0	0	0	0	0	0	0	0	0.825496	1.21578	2.91696	3.64784	4.13535	4.2081	4.52779	4.6569	5.07112	5.3899	5.64578	5.71714	5.71773	6.03859	6.05527	6.08409	6.26775	6.24424	6.92645	7.2332	7.31022	7.50675	7.7166	7.87274	8.10932	8.11322	8.34232	8.14002	7.7802	7.5804	7.3518	7.16534	6.85342
0	0	0	0	0	0	0	0	0	0	0	0	0	0	0	0	0	0.85184	1.24526	3.00032	3.75237	4.26186	4.36854	4.63938	4.77	5.24859	5.51773	5.77845	5.83773	5.89455	6.26289	6.22012	6.26452	6.41433	6.41979	7.08804	7.44347	7.51642	7.69502	7.99846	8.03401	8.33027	8.34232	8.60878	8.43763	8.04905	7.70643	7.61195	7.35272	7.05577
0	0	0	0	0	0	0	0	0	0	0	0	0	0	0	0	0	0.847359	1.21813	2.92164	3.6636	4.15211	4.23047	4.62517	4.69908	5.11456	5.42024	5.70016	5.78723	5.73998	6.0873	6.12458	6.12745	6.27331	6.26467	6.95675	7.27149	7.30145	7.59857	7.78203	7.87053	8.14134	8.14002	8.43763	8.30269	7.83164	7.56471	7.45401	7.22432	6.89521
0	0	0	0	0	0	0	0	0	0	0	0	0	0	0	0	0	0.792459	1.17602	2.77816	3.53441	3.9546	4.11685	4.39594	4.46174	4.91208	5.13952	5.4019	5.54412	5.43801	5.80461	5.83498	5.85629	5.99774	6.05037	6.61404	6.96463	7.04859	7.20255	7.47972	7.49703	7.77162	7.7802	8.04905	7.83164	7.44759	7.21658	7.1143	6.92248	6.59069
0	0	0	0	0	0	0	0	0	0	0	0	0	0	0	0	0	0.768138	1.118	2.68994	3.40232	3.84989	3.99081	4.24402	4.39466	4.74324	4.9536	5.23244	5.35387	5.27056	5.65633	5.65062	5.6658	5.79145	5.84831	6.40291	6.72256	6.839	7.02255	7.26209	7.32003	7.55718	7.5804	7.70643	7.56471	7.21658	7.0025	6.8801	6.64824	6.36688
0	0	0	0	0	0	0	0	0	0	0	0	0	0	0	0	0	0.743385	1.12815	2.63467	3.33925	3.75125	3.85848	4.12922	4.23363	4.61022	4.88962	5.10277	5.20797	5.1717	5.528	5.55591	5.55057	5.69713	5.67362	6.29857	6.61404	6.64207	6.84302	7.05554	7.17007	7.39845	7.3518	7.61195	7.45401	7.1143	6.8801	6.70771	6.51031	6.25119
0	0	0	0	0	0	0	0	0	0	0	0	0	0	0	0	0	0.737197	1.07052	2.53766	3.21476	3.59127	3.73197	4.05596	4.15328	4.50638	4.76334	4.96859	5.04899	5.06364	5.35824	5.38671	5.34081	5.53803	5.5033	6.09781	6.37947	6.43438	6.57582	6.80535	6.96536	7.11829	7.16534	7.35272	7.22432	6.92248	6.64824	6.51031	6.31291	6.02616
0	0	0	0	0	0	0	0	0	0	0	0	0	0	0	0	0	0.704322	1.02482	2.47698	3.07708	3.46507	3.59344	3.82791	3.93974	4.32709	4.56592	4.79927	4.90006	4.83643	5.14219	5.12756	5.16701	5.3066	5.33712	5.86891	6.11082	6.19733	6.3521	6.5451	6.69659	6.86532	6.85342	7.05577	6.89521	6.59069	6.36688	6.25119	6.02616	5.83258
0	0	0	0	0	0	0	0	0	0	0	0	0	0	0	0	0	0.694644	1.01707	2.36644	2.98403	3.37237	3.48124	3.71623	3.80426	4.16319	4.40705	4.60239	4.69321	4.69311	5.02248	5.00635	4.99511	5.06434	5.10256	5.63027	5.91592	5.96067	6.22735	6.37975	6.42678	6.64312	6.62606	6.8674	6.72934	6.37273	6.22205	6.03082	5.86768	5.625
0	0	0	0	0	0	0	0	0	0	0	0	0	0	0	0	0	0.656578	0.961323	2.28631	2.85496	3.21627	3.32874	3.58026	3.65062	3.98852	4.24554	4.45802	4.55195	4.49946	4.7905	4.7887	4.83479	4.92518	4.91928	5.44368	5.68355	5.73069	5.94367	6.1139	6.23552	6.39242	6.39348	6.56065	6.46501	6.11999	5.9669	5.83205	5.62403	5.4239
0	0	0	0	0	0	0	0	0	0	0	0	0	0	0	0	0	0.613476	0.908176	2.17105	2.74788	3.06986	3.19248	3.39483	3.45582	3.8254	4.01417	4.21131	4.27918	4.30694	4.55313	4.55982	4.58046	4.68126	4.67536	5.17257	5.41418	5.47238	5.70801	5.82312	5.92745	6.10394	6.0716	6.289	6.12441	5.84754	5.71865	5.54353	5.36557	5.1299
0	0	0	0	0	0	0	0	0	0	0	0	0	0	0	0	0	0.599671	0.883223	2.12571	2.65696	2.97251	3.07512	3.30736	3.39922	3.70848	3.8954	4.05552	4.14461	4.16232	4.38237	4.38619	4.38886	4.51321	4.47859	4.97534	5.24302	5.25824	5.43378	5.64087	5.68277	5.86203	5.89585	6.056	5.93451	5.61964	5.46125	5.34349	5.11739	4.98527
0	0	0	0	0	0	0	0	0	0	0	0	0	0	0	0	0	0.574994	0.843135	2.02065	2.55204	2.85855	2.94117	3.15279	3.23743	3.52233	3.74999	3.92349	4.00384	3.99349	4.22377	4.2037	4.24911	4.35864	4.33009	4.80695	5.05042	5.076	5.2206	5.36337	5.44121	5.67522	5.67742	5.80034	5.70772	5.40921	5.26499	5.13092	5.00245	4.80404
0	0	0	0	0	0	0	0	0	0	0	0	0	0	0	0	0	0.573379	0.843048	2.0008	2.52949	2.84285	2.91003	3.12618	3.1965	3.476	3.66629	3.90752	3.94408	3.90845	4.18879	4.12436	4.17972	4.27654	4.28566	4.72798	4.9437	4.99062	5.16777	5.313	5.35551	5.5517	5.59078	5.66051	5.58213	5.31539	5.20633	5.07583	4.87844	4.71144
0	0	0	0	0	0	0	0	0	0	0	0	0	0	0	0	0	0.537768	0.7818	1.87352	2.36199	2.66667	2.75021	2.96061	3.01537	3.27899	3.47665	3.64039	3.74408	3.72375	3.93963	3.88952	3.96093	4.00052	4.03193	4.47301	4.68248	4.68643	4.84622	5.01189	5.06549	5.25152	5.24744	5.3774	5.29266	4.99746	4.86446	4.7879	4.64023	4.4662
0	0	0	0	0	0	0	0	0	0	0	0	0	0	0	0	0	0.547231	0.802235	1.87941	2.37865	2.65046	2.73102	2.95836	3.06497	3.31831	3.49998	3.66294	3.72862	3.70473	3.97054	3.97305	3.97352	4.08376	4.05583	4.5069	4.69338	4.77195	4.89217	5.07437	5.106	5.29904	5.26996	5.45663	5.312	5.09853	4.93939	4.75256	4.66	4.50381
0	0	0	0	0	0	0	0	0	0	0	0	0	0	0	0	0	0.516021	0.754692	1.78908	2.23984	2.55018	2.60015	2.85156	2.88274	3.16278	3.31871	3.49368	3.55995	3.54336	3.77513	3.76396	3.76113	3.86321	3.87559	4.30826	4.47509	4.52372	4.63171	4.77583	4.90474	5.01956	5.03758	5.1356	5.06392	4.83672	4.67097	4.58495	4.41305	4.23236
0	0	0	0	0	0	0	0	0	0	0	0	0	0	0	0	0	0.503186	0.754354	1.74583	2.23053	2.50793	2.55082	2.75192	2.81488	3.08621	3.24364	3.40158	3.47879	3.50371	3.68427	3.6775	3.66788	3.77429	3.78236	4.19626	4.38993	4.47805	4.56626	4.68086	4.8386	4.92743	4.87783	5.06685	4.94715	4.72518	4.56419	4.51727	4.33951	4.16145
0	0	0	0	0	0	0	0	0	0	0	0	0	0	0	0	0	0.475743	0.708483	1.66786	2.07097	2.39514	2.43732	2.65029	2.67696	2.91873	3.10061	3.23537	3.27701	3.2756	3.53486	3.49679	3.48082	3.61334	3.57938	3.94992	4.13788	4.18345	4.33219	4.49048	4.47943	4.66097	4.66499	4.78869	4.73356	4.53025	4.34263	4.25227	4.12486	3.92088
0	0	0	0	0	0	0	0	0	0	0	0	0	0	0	0	0	0.444223	0.649147	1.51239	1.93378	2.16294	2.22399	2.40531	2.46711	2.668	2.85135	2.99852	3.02019	3.0258	3.18969	3.20676	3.21871	3.32283	3.28587	3.62837	3.80961	3.86409	3.96788	4.09034	4.12211	4.22659	4.27944	4.37745	4.2853	4.11432	3.9727	3.91209	3.81813	3.65695
0	0	0	0	0	0	0	0	0	0	0	0	0	0	0	0	0	0.38004	0.568213	1.37171	1.65717	1.9254	1.95123	2.09365	2.17476	2.38408	2.51313	2.63749	2.69461	2.64904	2.8407	2.78929	2.82632	2.89457	2.90703	3.23745	3.346	3.35969	3.50673	3.59792	3.64653	3.78549	3.76049	3.8909	3.8004	3.57693	3.52652	3.43851	3.31886	3.2083
0	0	0	0	0	0	0	0	0	0	0	0	0	0	0	0	0	0.268592	0.418183	0.987643	1.23248	1.39688	1.43497	1.53862	1.57327	1.71838	1.82872	1.91424	1.9426	1.95205	2.06546	2.08578	2.06372	2.12104	2.11117	2.33312	2.46118	2.48582	2.53198	2.60794	2.67126	2.75371	2.76113	2.81539	2.79649	2.6773	2.57555	2.51298	2.46078	2.31961
0	0	0	0	0	0	0	0	0	0	0	0	0	0	0	0	0	0.232538	0.343942	0.814244	1.02886	1.14843	1.18023	1.26609	1.30697	1.41622	1.5023	1.57256	1.60505	1.61314	1.74192	1.68661	1.70129	1.73936	1.76426	1.94376	2.01848	2.03029	2.10793	2.13885	2.22016	2.25242	2.28527	2.34158	2.28064	2.20542	2.11596	2.0909	2.01117	1.93339
0	0	0	0	0	0	0	0	0	0	0	0	0	0	0	0	0	0.241251	0.351973	0.82314	1.01309	1.17976	1.18496	1.29126	1.33425	1.44698	1.53984	1.59528	1.6275	1.59763	1.71559	1.72491	1.71636	1.77181	1.764	1.94906	2.02259	2.06349	2.10924	2.17794	2.20956	2.28417	2.29725	2.35129	2.33716	2.20051	2.15711	2.0734	2.0267	1.97132
0	0	0	0	0	0	0	0	0	0	0	0	0	0	0	0	0	0.185029	0.263772	0.627677	0.785403	0.90373	0.919784	0.964965	1.01578	1.09688	1.1646	1.21957	1.24193	1.2395	1.33248	1.31397	1.30674	1.36021	1.36833	1.49425	1.57083	1.57786	1.63588	1.70094	1.68716	1.75521	1.75901	1.81726	1.76316	1.69566	1.63779	1.5792	1.57521	1.4727
0	0	0	0	0	0	0	0	0	0	0	0	0	0	0	0	0	0.14556	0.210128	0.519203	0.636282	0.708128	0.737532	0.786277	0.815571	0.885262	0.925625	0.986015	0.982494	0.992603	1.05681	1.03297	1.06321	1.08083	1.07997	1.20505	1.2383	1.23229	1.29188	1.33535	1.35084	1.38682	1.41766	1.45149	1.40979	1.34937	1.29667	1.26824	1.23227	1.18308
0	0	0	0	0	0	0	0	0	0	0	0	0	0	0	0	0	0.11885	0.179432	0.414539	0.520004	0.584708	0.606597	0.661775	0.676775	0.722702	0.769244	0.789665	0.816443	0.801108	0.880034	0.884652	0.86402	0.873268	0.889738	0.959095	1.02281	1.03953	1.06232	1.10987	1.1104	1.15916	1.14181	1.18897	1.15974	1.10778	1.04402	1.05754	1.00468	0.968429
0	0	0	0	0	0	0	0	0	0	0	0	0	0	0	0	0	0.101807	0.140162	0.341018	0.425086	0.474392	0.486475	0.530488	0.539927	0.587557	0.632138	0.649167	0.647457	0.648002	0.698913	0.696914	0.709845	0.719394	0.724338	0.792127	0.8245	0.842159	0.863655	0.904105	0.904738	0.928951	0.922789	0.990137	0.932402	0.892816	0.8864	0.861059	0.818113	0.808831
0	0	0	0	0	0	0	0	0	0	0	0	0	0	0	0	0	0.0771005	0.113661	0.279828	0.352549	0.410883	0.408923	0.443727	0.445061	0.506239	0.519584	0.548211	0.54614	0.555168	0.597592	0.591404	0.593672	0.620694	0.610482	0.65863	0.699851	0.710413	0.738205	0.749898	0.758954	0.788655	0.781736	0.809459	0.792042	0.757706	0.73275	0.723108	0.702632	0.686454
0	0	0	0	0	0	0	0	0	0	0	0	0	0	0	0	0	0.065337	0.0950112	0.240581	0.300662	0.34733	0.353642	0.37189	0.39055	0.412001	0.423795	0.473976	0.473323	0.473946	0.498067	0.500588	0.496481	0.501202	0.520661	0.581225	0.595364	0.603665	0.622092	0.646296	0.650895	0.673135	0.679556	0.695158	0.670181	0.645777	0.616356	0.615234	0.601162	0.56413
0	0	0	0	0	0	0	0	0	0	0	0	0	0	0	0	0	0.055221	0.0774231	0.196722	0.247986	0.276467	0.301144	0.313163	0.304848	0.353692	0.369253	0.37136	0.385875	0.380368	0.411309	0.398733	0.419151	0.417897	0.426131	0.465107	0.486543	0.490414	0.50324	0.51959	0.535164	0.537634	0.547126	0.573902	0.55262	0.512918	0.509109	0.492791	0.484299	0.466567
0	0	0	0	0	0	0	0	0	0	0	0	0	0	0	0	0	0.0470251	0.0676257	0.163411	0.200781	0.232034	0.240285	0.26335	0.273018	0.284561	0.296965	0.32566	0.32257	0.322015	0.343065	0.331264	0.349528	0.35405	0.363468	0.394768	0.414515	0.408336	0.428242	0.429557	0.44419	0.453331	0.45756	0.471515	0.462511	0.436097	0.436223	0.409316	0.396735	0.380507
0	0	0	0	0	0	0	0	0	0	0	0	0	0	0	0	0	0.0379112	0.0557622	0.132003	0.16776	0.18415	0.193422	0.203376	0.206074	0.230521	0.241047	0.251552	0.26125	0.26164	0.272676	0.276169	0.270579	0.280483	0.284039	0.312039	0.322393	0.325268	0.330324	0.346903	0.350379	0.36832	0.355362	0.38171	0.361891	0.336641	0.335656	0.335464	0.3253	0.311678
0	0	0	0	0	0	0	0	0	0	0	0	0	0	0	0	0	0.0343833	0.0469645	0.108032	0.144707	0.161239	0.171021	0.180159	0.193247	0.199805	0.202849	0.2268	0.218318	0.22436	0.243647	0.233487	0.230059	0.239171	0.245344	0.270485	0.277497	0.284932	0.290621	0.30313	0.313384	0.317478	0.307829	0.32396	0.32274	0.309856	0.294579	0.286664	0.273043	0.281224
0	0	0	0	0	0	0	0	0	0	0	0	0	0	0	0	0	0.0265783	0.0365832	0.08956	0.120412	0.131884	0.135393	0.144093	0.144005	0.156554	0.177097	0.174573	0.180693	0.185118	0.192623	0.191187	0.189131	0.199556	0.202209	0.209631	0.220003	0.245033	0.241897	0.241939	0.240176	0.262955	0.254757	0.263851	0.25826	0.237464	0.24185	0.235633	0.224087	0.219403
0	0	0	0	0	0	0	0	0	0	0	0	0	0	0	0	0	0.0211943	0.0292663	0.0776162	0.0941042	0.107468	0.106992	0.106163	0.116388	0.136427	0.134432	0.146168	0.153825	0.139581	0.156442	0.143249	0.153684	0.163497	0.150584	0.17257	0.17648	0.18504	0.196567	0.199321	0.199458	0.211031	0.206757	0.209687	0.213793	0.198143	0.188778	0.192862	0.184288	0.175877
0	0	0	0	0	0	0	0	0	0	0	0	0	0	0	0	0	0.0164303	0.0252678	0.0687636	0.074435	0.0922872	0.0892087	0.107982	0.102259	0.107779	0.110272	0.124095	0.126661	0.122195	0.124168	0.124203	0.133002	0.129363	0.130681	0.151129	0.149099	0.15572	0.161943	0.165444	0.167454	0.17881	0.176544	0.18264	0.173038	0.168009	0.162473	0.165573	0.150057	0.141096
0	0	0	0	0	0	0	0	0	0	0	0	0	0	0	0	0	0.0108209	0.0197883	0.0434052	0.0551091	0.0640981	0.0680255	0.0772936	0.0706014	0.077561	0.0850218	0.0888335	0.0910738	0.0877935	0.0943638	0.0914918	0.0955027	0.0979269	0.098057	0.104648	0.116308	0.116554	0.121142	0.119411	0.135222	0.130656	0.120121	0.139817	0.127264	0.123854	0.122794	0.117966	0.111246	0.107612
0	0	0	0	0	0	0	0	0	0	0	0	0	0	0	0	0	0.0104971	0.0141386	0.0346881	0.0423234	0.0552044	0.0515092	0.0594759	0.0570313	0.0650757	0.0707073	0.0730366	0.0730281	0.0727231	0.0816954	0.0731171	0.0723166	0.0828454	0.0819308	0.086312	0.0934245	0.0888152	0.0980106	0.100117	0.0987267	0.0971553	0.103343	0.103344	0.104068	0.095628	0.092635	0.0926619	0.0897181	0.0868107
0	0	0	0	0	0	0	0	0	0	0	0	0	0	0	0	0	0.00924955	0.0131515	0.0311973	0.0383486	0.0445852	0.0448916	0.0487353	0.0480224	0.0520933	0.0533723	0.0593307	0.0612052	0.0617583	0.0631428	0.063256	0.0674325	0.0647364	0.0660048	0.0734224	0.0754269	0.0742793	0.0770202	0.0810499	0.0846019	0.0857951	0.0830952	0.084219	0.0867754	0.0786725	0.0862997	0.0821472	0.0759527	0.0787706
0	0	0	0	0	0	0	0	0	0	0	0	0	0	0	0	0	0.00891679	0.0115959	0.0228451	0.0292366	0.0334207	0.0370216	0.039449	0.0343406	0.0404545	0.046852	0.0498084	0.0458237	0.0487271	0.0517375	0.0534528	0.0500346	0.0558816	0.0512069	0.0561742	0.0647815	0.0614674	0.0620967	0.0635344	0.0680632	0.0675233	0.0720462	0.0638637	0.0700539	0.0654965	0.0630458	0.0592508	0.0616149	0.0592239
0	0	0	0	0	0	0	0	0	0	0	0	0	0	0	0	0	0.00560502	0.00870409	0.0221773	0.0231317	0.0260694	0.0278978	0.0333944	0.0314896	0.0349221	0.035762	0.040097	0.039115	0.0393843	0.0375145	0.0375217	0.0431877	0.0402783	0.0399324	0.0473871	0.0485768	0.0501217	0.051859	0.0507141	0.0497013	0.055836	0.0594921	0.0591238	0.0522619	0.0526814	0.0535261	0.0474737	0.0499345	0.0491611
0	0	0	0	0	0	0	0	0	0	0	0	0	0	0	0	0	0.00397104	0.00698912	0.0157154	0.0197791	0.0246321	0.0218196	0.0242743	0.02569	0.0276795	0.0257704	0.0286141	0.0290735	0.0315461	0.0350928	0.0313416	0.0320488	0.0352663	0.0326852	0.0351369	0.038006	0.0394107	0.0425383	0.0404878	0.0390872	0.0477551	0.0409899	0.0430251	0.0455	0.0393399	0.0390919	0.0422662	0.0404071	0.0363202
0	0	0	0	0	0	0	0	0	0	0	0	0	0	0	0	0	0.00279235	0.00624936	0.0109931	0.0159868	0.0171112	0.0182319	0.0176544	0.0195446	0.0205825	0.0230511	0.0246903	0.0214656	0.0242898	0.0253678	0.0261506	0.0249695	0.025231	0.0260262	0.0284316	0.0290069	0.027127	0.0312916	0.0332808	0.0349875	0.0339478	0.0308352	0.034045	0.0343129	0.0293646	0.0327901	0.0278298	0.031785	0.0304995
0	0	0	0	0	0	0	0	0	0	0	0	0	0	0	0	0	0.00211924	0.0039349	0.00860176	0.0110644	0.0126162	0.0153393	0.0133889	0.0166695	0.0163463	0.0179287	0.017956	0.0184875	0.0181385	0.0181295	0.0176237	0.0216866	0.0180698	0.0194965	0.0225347	0.0215549	0.0219399	0.0216447	0.0255789	0.025307	0.0259109	0.0245331	0.0267626	0.0241433	0.0227154	0.0256041	0.0233997	0.0223978	0.0214261
0	0	0	0	0	0	0	0	0	0	0	0	0	0	0	0	0	0.00196235	0.00422478	0.00703179	0.0077235	0.00928581	0.0102278	0.0115964	0.0114745	0.0111235	0.0116319	0.0134088	0.012197	0.0110391	0.0132267	0.0125555	0.0124447	0.0156934	0.0139597	0.0143753	0.0171117	0.0174856	0.0165147	0.0189838	0.0173773	0.016006	0.0169392	0.0196369	0.0194777	0.0205695	0.0152704	0.0163396	0.0166286	0.015257
0	0	0	0	0	0	0	0	0	0	0	0	0	0	0	0	0	0.00149011	0.00151811	0.00453212	0.00600712	0.00657678	0.00668287	0.00724155	0.00665905	0.00740575	0.00875594	0.00892691	0.00861788	0.00823165	0.0106242	0.0100012	0.00977981	0.00918207	0.00939385	0.0123066	0.0130059	0.0101841	0.0116207	0.0109817	0.0123008	0.0107951	0.0109203	0.0123659	0.0138022	0.0109585	0.0113535	0.0106313	0.0112326	0.00986109
0	0	0	0	0	0	0	0	0	0	0	0	0	0	0	0	0	0.000581396	0.000635995	0.00308232	0.00409405	0.0040325	0.0039223	0.00601272	0.00457842	0.00628629	0.00586406	0.00470934	0.00674121	0.00603224	0.0068015	0.00647882	0.00667006	0.00667912	0.00481248	0.00766585	0.00804732	0.00794024	0.00706921	0.00924196	0.00858807	0.00836973	0.00745985	0.00858161	0.0082537	0.0088757	0.00837758	0.00678809	0.00611413	0.00727666
0	0	0	0	0	0	0	0	0	0	0	0	0	0	0	0	0	0.000420022	0.000439094	0.00160046	0.00187467	0.00163923	0.00212079	0.00288993	0.00186074	0.00306623	0.00325377	0.00259773	0.00257786	0.00352448	0.00362755	0.00289197	0.00451687	0.00376943	0.00299811	0.00438928	0.00332201	0.00481371	0.00406344	0.00492988	0.00488606	0.0036882	0.00406621	0.0042764	0.00379488	0.00383855	0.00355985	0.00386403	0.003983	0.00304632
0	0	0	0	0	0	0	0	0	0	0	0	0	0	0	0	0	0.000911302	0.000728811	0.00196152	0.00198833	0.00360523	0.00209307	0.00252159	0.00248306	0.00312175	0.00327258	0.00313327	0.00272356	0.0036188	0.00359576	0.00292986	0.00302624	0.00348354	0.00398059	0.0055599	0.00464984	0.00375569	0.00441349	0.00614228	0.00502822	0.00421875	0.00519589	0.00691613	0.0043473	0.00394003	0.00411551	0.00450094	0.00502252	0.00406618
0	0	0	0	0	0	0	0	0	0	0	0	0	0	0	0	0	0.000372015	0.000352919	0.000903069	0.00117904	0.00107441	0.00159994	0.00196623	0.00243413	0.00170956	0.00415824	0.00154102	0.00159448	0.00167792	0.00181251	0.00189652	0.00198668	0.00237899	0.00199227	0.00240216	0.00286026	0.00203507	0.00287503	0.00317272	0.00198872	0.00211777	0.00222512	0.00280573	0.00301315	0.00274747	0.00258191	0.00221873	0.00150417	0.00227061
0	0	0	0	0	0	0	0	0	0	0	0	0	0	0	0	0	0.000311487	0.000468218	0.000931153	0.00100671	0.00193882	0.00167966	0.0011731	0.00148983	0.00148205	0.00187713	0.00195899	0.0018193	0.00217808	0.00224796	0.00190029	0.00226431	0.00216439	0.00178798	0.00251036	0.0025522	0.00258582	0.00238711	0.0024373	0.0034329	0.00458622	0.00323365	0.00244708	0.00314137	0.0026967	0.00279482	0.00240806	0.00241787	0.0024967
0	0	0	0	0	0	0	0	0	0	0	0	0	0	0	0	0	0.000252945	0.00013472	0.00104823	0.000525715	0.00091313	0.000953372	0.00132541	0.00135153	0.000673508	0.00157754	0.00113906	0.000917506	0.000761127	0.00152598	0.00133778	0.00157891	0.00149329	0.00111405	0.00152702	0.00118154	0.00134696	0.00140329	0.00150692	0.0012434	0.00148036	0.0014392	0.0016872	0.00271135	0.0010167	0.00133322	0.00157281	0.00136479	0.00188524
0	0	0	0	0	0	0	0	0	0	0	0	0	0	0	0	0	5.5919e-05	0.000282435	0.000148356	0.00037638	0.00074164	0.000354125	0.000535041	0.000586734	0.000330265	0.000545743	0.00067475	0.000449474	0.000726545	0.000419071	0.000461052	0.000779702	0.000396101	0.0018155	0.000655762	0.000809079	0.00152656	0.00098829	0.00037237	0.000806738	0.000962044	0.000756227	0.00106507	0.000757533	0.000976146	0.000994371	0.000771557	0.000796821	0.000814723
0	0	0	0	0	0	0	0	0	0	0	0	0	0	0	0	0	8.52569e-05	9.42254e-05	0.000149496	0.000250518	0.000166035	0.000158292	0.000337442	0.000189069	0.000364178	0.000546156	0.000633482	0.000245396	0.000325192	0.00023805	0.000228102	0.000336313	0.000375451	0.000263965	0.000263763	0.000366682	0.000297416	0.000716665	0.000474394	0.000506203	0.000461013	0.000476624	0.000390513	0.000435633	0.000384004	0.000464227	0.000252293	0.000419179	0.000429313
0	0	0	0	0	0	0	0	0	0	0	0	0	0	0	0	0	2.43599e-05	0.000214197	0.000494142	0.000172599	0.000241372	0.000224311	0.000572166	0.000297311	0.000365287	0.000336845	0.000372329	0.000416054	0.000401486	0.000271905	0.000532873	0.000481313	0.000530604	0.000318817	0.000541203	0.000346319	0.000279404	0.000469549	0.000426598	0.000541708	0.000578021	0.000671775	0.000637714	0.000735364	0.000478509	0.00041827	0.000402837	0.000620911	0.000474702
0	0	0	0	0	0	0	0	0	0	0	0	0	0	0	0	0	0	0	0	0	0	0	0	0	0	0	0	0	0	0	0	0	0	0	0	0	0	0	0	0	0	0	0	0	0	0	0	0	0
General community
0.860891	0.853165	0.858092	0.868183	0.851155	0.93029	0.940485	0.945452	0.98588	1.00335	1.0199	1.05603	1.05228	1.07537	1.08786	1.12614	1.12983	1.13457	1.12297	1.12633	1.06752	1.08718	1.0842	1.10917	1.10321	1.15565	1.17311	1.19396	1.19736	1.19707	1.23624	1.25002	1.26397	1.30244	1.32256	1.36802	1.42757	1.44298	1.48636	1.5301	1.55233	1.59623	1.59397	1.63412	1.5946	1.5304	1.48656	1.4527	1.4131	1.36677
0.853165	0.845509	0.850392	0.860392	0.843517	0.921941	0.932045	0.936967	0.977032	0.99435	1.01074	1.04655	1.04284	1.06572	1.0781	1.11603	1.11969	1.12439	1.11289	1.11623	1.05794	1.07742	1.07447	1.09922	1.09331	1.14527	1.16258	1.18324	1.18662	1.18633	1.22514	1.2388	1.25263	1.29076	1.31069	1.35574	1.41475	1.43003	1.47302	1.51637	1.5384	1.5819	1.57966	1.61946	1.58029	1.51667	1.47322	1.43966	1.40042	1.35451
0.858092	0.850392	0.855303	0.86536	0.848388	0.927265	0.937428	0.942378	0.982675	1.00009	1.01658	1.05259	1.04886	1.07187	1.08433	1.12248	1.12616	1.13088	1.11932	1.12267	1.06405	1.08365	1.08067	1.10557	1.09962	1.15189	1.16929	1.19008	1.19347	1.19318	1.23222	1.24596	1.25987	1.29821	1.31826	1.36357	1.42292	1.43829	1.48153	1.52513	1.54728	1.59104	1.58879	1.62881	1.58941	1.52543	1.48173	1.44798	1.40851	1.36233
0.868183	0.860392	0.86536	0.875536	0.858364	0.938169	0.948451	0.95346	0.99423	1.01185	1.02853	1.06497	1.0612	1.08448	1.09708	1.13567	1.1394	1.14418	1.13248	1.13587	1.07657	1.09639	1.09338	1.11857	1.11255	1.16543	1.18304	1.20407	1.2075	1.20721	1.24671	1.26061	1.27468	1.31348	1.33376	1.37961	1.43966	1.4552	1.49895	1.54306	1.56548	1.60975	1.60747	1.64796	1.6081	1.54337	1.49915	1.465	1.42507	1.37835
0.851155	0.843517	0.848388	0.858364	0.841529	0.919769	0.929849	0.93476	0.97473	0.992007	1.00836	1.04408	1.04038	1.06321	1.07556	1.1134	1.11705	1.12174	1.11027	1.1136	1.05545	1.07488	1.07194	1.09663	1.09073	1.14258	1.15984	1.18046	1.18382	1.18353	1.22226	1.23588	1.24968	1.28772	1.3076	1.35255	1.41142	1.42666	1.46955	1.5128	1.53478	1.57818	1.57594	1.61564	1.57656	1.51309	1.46975	1.43627	1.39712	1.35132
0.93029	0.921941	0.927265	0.938169	0.919769	1.00528	1.0163	1.02167	1.06535	1.08424	1.10211	1.14116	1.13711	1.16206	1.17556	1.21692	1.22091	1.22603	1.2135	1.21713	1.15358	1.17482	1.1716	1.19859	1.19214	1.24881	1.26767	1.29021	1.29388	1.29357	1.3359	1.35079	1.36587	1.40744	1.42918	1.4783	1.54265	1.5593	1.60618	1.65345	1.67747	1.7249	1.72246	1.76585	1.72314	1.65377	1.60639	1.56981	1.52701	1.47695
0.940485	0.932045	0.937428	0.948451	0.929849	1.0163	1.02744	1.03286	1.07703	1.09612	1.11419	1.15366	1.14957	1.17479	1.18844	1.23025	1.23429	1.23947	1.22679	1.23047	1.16622	1.1877	1.18444	1.21172	1.20521	1.26249	1.28157	1.30435	1.30806	1.30775	1.35054	1.36559	1.38084	1.42286	1.44484	1.4945	1.55955	1.57639	1.62378	1.67157	1.69585	1.74381	1.74134	1.7852	1.74203	1.6719	1.624	1.58701	1.54375	1.49314
0.945452	0.936967	0.942378	0.95346	0.93476	1.02167	1.03286	1.03832	1.08272	1.10191	1.12008	1.15976	1.15564	1.181	1.19472	1.23675	1.24081	1.24601	1.23327	1.23697	1.17238	1.19397	1.19069	1.21812	1.21157	1.26916	1.28834	1.31123	1.31497	1.31465	1.35767	1.3728	1.38813	1.43038	1.45247	1.50239	1.56779	1.58471	1.63236	1.68039	1.70481	1.75302	1.75054	1.79463	1.75123	1.68073	1.63258	1.59539	1.5519	1.50102
0.98588	0.977032	0.982675	0.99423	0.97473	1.06535	1.07703	1.08272	1.12902	1.14903	1.16797	1.20935	1.20506	1.2315	1.2458	1.28963	1.29386	1.29929	1.28601	1.28986	1.22251	1.24502	1.24161	1.27021	1.26338	1.32343	1.34343	1.3673	1.3712	1.37087	1.41572	1.43151	1.44749	1.49154	1.51458	1.56664	1.63483	1.65248	1.70216	1.75225	1.77771	1.82798	1.82539	1.87137	1.82611	1.75259	1.70239	1.66361	1.61826	1.56521
1.00335	0.99435	1.00009	1.01185	0.992007	1.08424	1.09612	1.10191	1.14903	1.16939	1.18867	1.23078	1.22642	1.25332	1.26789	1.31249	1.3168	1.32232	1.3088	1.31272	1.24418	1.26709	1.26361	1.29272	1.28577	1.34689	1.36724	1.39154	1.3955	1.39517	1.44082	1.45688	1.47314	1.51798	1.54142	1.59441	1.6638	1.68177	1.73233	1.78331	1.80922	1.86038	1.85774	1.90454	1.85848	1.78366	1.73256	1.6931	1.64694	1.59295
1.0199	1.01074	1.01658	1.02853	1.00836	1.10211	1.11419	1.12008	1.16797	1.18867	1.20827	1.25107	1.24664	1.27399	1.28879	1.33413	1.33851	1.34412	1.33038	1.33436	1.26469	1.28798	1.28445	1.31404	1.30697	1.36909	1.38978	1.41448	1.41851	1.41817	1.46457	1.4809	1.49743	1.543	1.56684	1.62069	1.69123	1.70949	1.76089	1.81271	1.83904	1.89105	1.88837	1.93594	1.88912	1.81307	1.76112	1.72101	1.6741	1.61921
1.05603	1.04655	1.05259	1.06497	1.04408	1.14116	1.15366	1.15976	1.20935	1.23078	1.25107	1.2954	1.2908	1.31912	1.33445	1.3814	1.38592	1.39174	1.37751	1.38164	1.3095	1.33361	1.32995	1.36059	1.35327	1.41759	1.43901	1.46459	1.46877	1.46841	1.51645	1.53336	1.55048	1.59767	1.62234	1.67811	1.75115	1.77005	1.82327	1.87693	1.9042	1.95804	1.95527	2.00452	1.95604	1.8773	1.82351	1.78198	1.7334	1.67658
1.05228	1.04284	1.04886	1.0612	1.04038	1.13711	1.14957	1.15564	1.20506	1.22642	1.24664	1.2908	1.28623	1.31444	1.32972	1.3765	1.38101	1.38681	1.37263	1.37674	1.30485	1.32888	1.32523	1.35576	1.34847	1.41257	1.43391	1.4594	1.46356	1.4632	1.51108	1.52792	1.54498	1.592	1.61659	1.67216	1.74494	1.76378	1.81681	1.87027	1.89744	1.9511	1.94834	1.99742	1.94911	1.87064	1.81705	1.77566	1.72726	1.67063
1.07537	1.06572	1.07187	1.08448	1.06321	1.16206	1.17479	1.181	1.2315	1.25332	1.27399	1.31912	1.31444	1.34328	1.35889	1.40669	1.41131	1.41723	1.40274	1.40694	1.33348	1.35803	1.35431	1.38551	1.37806	1.44356	1.46537	1.49141	1.49566	1.4953	1.54423	1.56144	1.57887	1.62693	1.65205	1.70884	1.78322	1.80247	1.85666	1.9113	1.93907	1.9939	1.99108	2.04123	1.99187	1.91168	1.85691	1.81462	1.76515	1.70728
1.08786	1.0781	1.08433	1.09708	1.07556	1.17556	1.18844	1.19472	1.2458	1.26789	1.28879	1.33445	1.32972	1.35889	1.37468	1.42304	1.4277	1.4337	1.41904	1.42329	1.34897	1.37381	1.37004	1.4016	1.39407	1.46033	1.48239	1.50874	1.51304	1.51268	1.56217	1.57959	1.59722	1.64583	1.67125	1.7287	1.80394	1.82341	1.87824	1.93351	1.9616	2.01707	2.01421	2.06495	2.01501	1.93389	1.87849	1.8357	1.78566	1.72712
1.12614	1.11603	1.12248	1.13567	1.1134	1.21692	1.23025	1.23675	1.28963	1.31249	1.33413	1.3814	1.3765	1.40669	1.42304	1.4731	1.47793	1.48414	1.46896	1.47336	1.39643	1.42215	1.41824	1.45092	1.44311	1.51171	1.53455	1.56182	1.56627	1.5659	1.61713	1.63516	1.65341	1.70374	1.73005	1.78951	1.86741	1.88757	1.94432	2.00153	2.03061	2.08803	2.08508	2.1376	2.0859	2.00193	1.94457	1.90028	1.84848	1.78788
1.12983	1.11969	1.12616	1.1394	1.11705	1.22091	1.23429	1.24081	1.29386	1.3168	1.33851	1.38592	1.38101	1.41131	1.4277	1.47793	1.48278	1.489	1.47378	1.47819	1.40101	1.42681	1.42289	1.45567	1.44784	1.51666	1.53958	1.56694	1.57141	1.57103	1.62243	1.64052	1.65883	1.70932	1.73572	1.79538	1.87353	1.89375	1.95069	2.00809	2.03727	2.09488	2.09191	2.14461	2.09274	2.00849	1.95095	1.90651	1.85454	1.79374
1.13457	1.12439	1.13088	1.14418	1.12174	1.22603	1.23947	1.24601	1.29929	1.32232	1.34412	1.39174	1.38681	1.41723	1.4337	1.48414	1.489	1.49526	1.47997	1.4844	1.40689	1.4328	1.42887	1.46178	1.45392	1.52303	1.54604	1.57352	1.57801	1.57763	1.62924	1.64741	1.6658	1.7165	1.74301	1.80292	1.88139	1.9017	1.95888	2.01652	2.04582	2.10367	2.1007	2.15361	2.10153	2.01692	1.95914	1.91452	1.86233	1.80127
1.12297	1.11289	1.11932	1.13248	1.11027	1.2135	1.22679	1.23327	1.28601	1.3088	1.33038	1.37751	1.37263	1.40274	1.41904	1.46896	1.47378	1.47997	1.46483	1.46922	1.39251	1.41815	1.41426	1.44684	1.43906	1.50746	1.53023	1.55743	1.56187	1.56149	1.61258	1.63056	1.64876	1.69894	1.72518	1.78448	1.86216	1.88226	1.93885	1.9959	2.0249	2.08216	2.07921	2.13159	2.08004	1.9963	1.93911	1.89494	1.84329	1.78286
1.12633	1.11623	1.12267	1.13587	1.1136	1.21713	1.23047	1.23697	1.28986	1.31272	1.33436	1.38164	1.37674	1.40694	1.42329	1.47336	1.47819	1.4844	1.46922	1.47362	1.39668	1.42239	1.41849	1.45117	1.44337	1.51197	1.53482	1.5621	1.56655	1.56617	1.61741	1.63545	1.6537	1.70403	1.73035	1.78983	1.86773	1.8879	1.94466	2.00188	2.03097	2.0884	2.08544	2.13797	2.08627	2.00228	1.94492	1.90062	1.84881	1.7882
1.06752	1.05794	1.06405	1.07657	1.05545	1.15358	1.16622	1.17238	1.22251	1.24418	1.26469	1.3095	1.30485	1.33348	1.34897	1.39643	1.40101	1.40689	1.39251	1.39668	1.32375	1.34813	1.34443	1.3754	1.368	1.43303	1.45468	1.48053	1.48475	1.4844	1.53296	1.55005	1.56736	1.61506	1.64	1.69638	1.77021	1.78932	1.84312	1.89736	1.92493	1.97936	1.97656	2.02635	1.97734	1.89773	1.84337	1.80138	1.75228	1.69483
1.08718	1.07742	1.08365	1.09639	1.07488	1.17482	1.1877	1.19397	1.24502	1.26709	1.28798	1.33361	1.32888	1.35803	1.37381	1.42215	1.42681	1.4328	1.41815	1.42239	1.34813	1.37295	1.36918	1.40072	1.39319	1.45941	1.48146	1.5078	1.51209	1.51173	1.56119	1.57859	1.59622	1.6448	1.6702	1.72761	1.80281	1.82227	1.87706	1.93229	1.96037	2.0158	2.01295	2.06365	2.01375	1.93267	1.87731	1.83455	1.78454	1.72603
1.0842	1.07447	1.08067	1.09338	1.07194	1.1716	1.18444	1.19069	1.24161	1.26361	1.28445	1.32995	1.32523	1.35431	1.37004	1.41824	1.42289	1.42887	1.41426	1.41849	1.34443	1.36918	1.36543	1.39688	1.38937	1.45541	1.4774	1.50366	1.50794	1.50758	1.55691	1.57426	1.59184	1.64029	1.66562	1.72287	1.79786	1.81727	1.87191	1.92699	1.95499	2.01027	2.00743	2.05799	2.00822	1.92737	1.87216	1.82952	1.77964	1.7213
1.10917	1.09922	1.10557	1.11857	1.09663	1.19859	1.21172	1.21812	1.27021	1.29272	1.31404	1.36059	1.35576	1.38551	1.4016	1.45092	1.45567	1.46178	1.44684	1.45117	1.3754	1.40072	1.39688	1.42906	1.42138	1.48894	1.51143	1.5383	1.54268	1.54231	1.59277	1.61053	1.62851	1.67807	1.70399	1.76256	1.83928	1.85914	1.91503	1.97138	2.00003	2.05658	2.05367	2.1054	2.05448	1.97177	1.91529	1.87166	1.82064	1.76095
1.10321	1.09331	1.09962	1.11255	1.09073	1.19214	1.20521	1.21157	1.26338	1.28577	1.30697	1.35327	1.34847	1.37806	1.39407	1.44311	1.44784	1.45392	1.43906	1.44337	1.368	1.39319	1.38937	1.42138	1.41373	1.48093	1.50331	1.53003	1.53439	1.53402	1.58421	1.60187	1.61975	1.66905	1.69483	1.75308	1.82939	1.84914	1.90473	1.96078	1.98927	2.04552	2.04263	2.09408	2.04344	1.96117	1.90499	1.8616	1.81085	1.75148
1.15565	1.14527	1.15189	1.16543	1.14258	1.24881	1.26249	1.26916	1.32343	1.34689	1.36909	1.41759	1.41257	1.44356	1.46033	1.51171	1.51666	1.52303	1.50746	1.51197	1.43303	1.45941	1.45541	1.48894	1.48093	1.55132	1.57476	1.60275	1.60732	1.60693	1.65951	1.67801	1.69674	1.74838	1.77538	1.83641	1.91634	1.93703	1.99527	2.05398	2.08382	2.14275	2.13972	2.19362	2.14056	2.05439	1.99553	1.95008	1.89692	1.83473
1.17311	1.16258	1.16929	1.18304	1.15984	1.26767	1.28157	1.28834	1.34343	1.36724	1.38978	1.43901	1.43391	1.46537	1.48239	1.53455	1.53958	1.54604	1.53023	1.53482	1.45468	1.48146	1.4774	1.51143	1.50331	1.57476	1.59855	1.62697	1.6316	1.63121	1.68458	1.70336	1.72238	1.7748	1.80221	1.86416	1.9453	1.9663	2.02541	2.08502	2.11531	2.17513	2.17205	2.22676	2.17291	2.08543	2.02568	1.97955	1.92558	1.86245
1.19396	1.18324	1.19008	1.20407	1.18046	1.29021	1.30435	1.31123	1.3673	1.39154	1.41448	1.46459	1.4594	1.49141	1.50874	1.56182	1.56694	1.57352	1.55743	1.5621	1.48053	1.5078	1.50366	1.5383	1.53003	1.60275	1.62697	1.65588	1.6606	1.6602	1.71452	1.73364	1.75299	1.80634	1.83424	1.89729	1.97987	2.00125	2.06141	2.12208	2.15291	2.21379	2.21065	2.26634	2.21153	2.12249	2.06169	2.01473	1.95981	1.89556
1.19736	1.18662	1.19347	1.2075	1.18382	1.29388	1.30806	1.31497	1.3712	1.3955	1.41851	1.46877	1.46356	1.49566	1.51304	1.56627	1.57141	1.57801	1.56187	1.56655	1.48475	1.51209	1.50794	1.54268	1.53439	1.60732	1.6316	1.6606	1.66534	1.66494	1.71941	1.73858	1.75799	1.81149	1.83947	1.9027	1.98551	2.00695	2.06729	2.12812	2.15904	2.2201	2.21695	2.2728	2.21783	2.12854	2.06756	2.02047	1.96539	1.90096
1.19707	1.18633	1.19318	1.20721	1.18353	1.29357	1.30775	1.31465	1.37087	1.39517	1.41817	1.46841	1.4632	1.4953	1.51268	1.5659	1.57103	1.57763	1.56149	1.56617	1.4844	1.51173	1.50758	1.54231	1.53402	1.60693	1.63121	1.6602	1.66494	1.66453	1.71899	1.73816	1.75756	1.81105	1.83903	1.90224	1.98504	2.00647	2.06679	2.12761	2.15852	2.21956	2.21642	2.27225	2.2173	2.12803	2.06707	2.01998	1.96492	1.9005
1.23624	1.22514	1.23222	1.24671	1.22226	1.3359	1.35054	1.35767	1.41572	1.44082	1.46457	1.51645	1.51108	1.54423	1.56217	1.61713	1.62243	1.62924	1.61258	1.61741	1.53296	1.56119	1.55691	1.59277	1.58421	1.65951	1.68458	1.71452	1.71941	1.71899	1.77524	1.79503	1.81507	1.87031	1.8992	1.96448	2.04998	2.07211	2.13441	2.19722	2.22915	2.29218	2.28894	2.34659	2.28984	2.19766	2.1347	2.08608	2.02921	1.96268
1.25002	1.2388	1.24596	1.26061	1.23588	1.35079	1.36559	1.3728	1.43151	1.45688	1.4809	1.53336	1.52792	1.56144	1.57959	1.63516	1.64052	1.64741	1.63056	1.63545	1.55005	1.57859	1.57426	1.61053	1.60187	1.67801	1.70336	1.73364	1.73858	1.73816	1.79503	1.81504	1.8353	1.89116	1.92037	1.98638	2.07284	2.09522	2.15821	2.22172	2.254	2.31774	2.31446	2.37276	2.31537	2.22216	2.1585	2.10933	2.05183	1.98457
1.26397	1.25263	1.25987	1.27468	1.24968	1.36587	1.38084	1.38813	1.44749	1.47314	1.49743	1.55048	1.54498	1.57887	1.59722	1.65341	1.65883	1.6658	1.64876	1.6537	1.56736	1.59622	1.59184	1.62851	1.61975	1.69674	1.72238	1.75299	1.75799	1.75756	1.81507	1.8353	1.85579	1.91227	1.94181	2.00855	2.09598	2.1186	2.1823	2.24652	2.27916	2.34361	2.34029	2.39924	2.34122	2.24696	2.18259	2.13288	2.07474	2.00672
1.30244	1.29076	1.29821	1.31348	1.28772	1.40744	1.42286	1.43038	1.49154	1.51798	1.543	1.59767	1.592	1.62693	1.64583	1.70374	1.70932	1.7165	1.69894	1.70403	1.61506	1.6448	1.64029	1.67807	1.66905	1.74838	1.7748	1.80634	1.81149	1.81105	1.87031	1.89116	1.91227	1.97047	2.00091	2.06968	2.15977	2.18309	2.24872	2.31489	2.34853	2.41494	2.41152	2.47227	2.41247	2.31535	2.24902	2.19779	2.13788	2.06779
1.32256	1.31069	1.31826	1.33376	1.3076	1.42918	1.44484	1.45247	1.51458	1.54142	1.56684	1.62234	1.61659	1.65205	1.67125	1.73005	1.73572	1.74301	1.72518	1.73035	1.64	1.6702	1.66562	1.70399	1.69483	1.77538	1.80221	1.83424	1.83947	1.83903	1.8992	1.92037	1.94181	2.00091	2.03181	2.10165	2.19313	2.2168	2.28345	2.35065	2.3848	2.45224	2.44876	2.51045	2.44973	2.35111	2.28375	2.23174	2.1709	2.09973
1.36802	1.35574	1.36357	1.37961	1.35255	1.4783	1.4945	1.50239	1.56664	1.59441	1.62069	1.67811	1.67216	1.70884	1.7287	1.78951	1.79538	1.80292	1.78448	1.78983	1.69638	1.72761	1.72287	1.76256	1.75308	1.83641	1.86416	1.89729	1.9027	1.90224	1.96448	1.98638	2.00855	2.06968	2.10165	2.17389	2.26851	2.293	2.36194	2.43144	2.46677	2.53653	2.53293	2.59674	2.53394	2.43192	2.36225	2.30845	2.24552	2.1719
1.42757	1.41475	1.42292	1.43966	1.41142	1.54265	1.55955	1.56779	1.63483	1.6638	1.69123	1.75115	1.74494	1.78322	1.80394	1.86741	1.87353	1.88139	1.86216	1.86773	1.77021	1.80281	1.79786	1.83928	1.82939	1.91634	1.9453	1.97987	1.98551	1.98504	2.04998	2.07284	2.09598	2.15977	2.19313	2.26851	2.36725	2.39281	2.46475	2.53728	2.57414	2.64693	2.64318	2.70977	2.64423	2.53778	2.46507	2.40893	2.34326	2.26644
1.44298	1.43003	1.43829	1.4552	1.42666	1.5593	1.57639	1.58471	1.65248	1.68177	1.70949	1.77005	1.76378	1.80247	1.82341	1.88757	1.89375	1.9017	1.88226	1.8879	1.78932	1.82227	1.81727	1.85914	1.84914	1.93703	1.9663	2.00125	2.00695	2.00647	2.07211	2.09522	2.1186	2.18309	2.2168	2.293	2.39281	2.41864	2.49136	2.56467	2.60193	2.67551	2.67172	2.73902	2.67278	2.56517	2.49169	2.43493	2.36856	2.29091
1.48636	1.47302	1.48153	1.49895	1.46955	1.60618	1.62378	1.63236	1.70216	1.73233	1.76089	1.82327	1.81681	1.85666	1.87824	1.94432	1.95069	1.95888	1.93885	1.94466	1.84312	1.87706	1.87191	1.91503	1.90473	1.99527	2.02541	2.06141	2.06729	2.06679	2.13441	2.15821	2.1823	2.24872	2.28345	2.36194	2.46475	2.49136	2.56626	2.64178	2.68016	2.75595	2.75205	2.82137	2.75314	2.6423	2.5666	2.50814	2.43977	2.35979
1.5301	1.51637	1.52513	1.54306	1.5128	1.65345	1.67157	1.68039	1.75225	1.78331	1.81271	1.87693	1.87027	1.9113	1.93351	2.00153	2.00809	2.01652	1.9959	2.00188	1.89736	1.93229	1.92699	1.97138	1.96078	2.05398	2.08502	2.12208	2.12812	2.12761	2.19722	2.22172	2.24652	2.31489	2.35065	2.43144	2.53728	2.56467	2.64178	2.71952	2.75903	2.83705	2.83303	2.90439	2.83415	2.72005	2.64213	2.58195	2.51157	2.42923
1.55233	1.5384	1.54728	1.56548	1.53478	1.67747	1.69585	1.70481	1.77771	1.80922	1.83904	1.9042	1.89744	1.93907	1.9616	2.03061	2.03727	2.04582	2.0249	2.03097	1.92493	1.96037	1.95499	2.00003	1.98927	2.08382	2.11531	2.15291	2.15904	2.15852	2.22915	2.254	2.27916	2.34853	2.3848	2.46677	2.57414	2.60193	2.68016	2.75903	2.79911	2.87827	2.87419	2.94659	2.87533	2.75957	2.68051	2.61946	2.54806	2.46452
1.59623	1.5819	1.59104	1.60975	1.57818	1.7249	1.74381	1.75302	1.82798	1.86038	1.89105	1.95804	1.9511	1.9939	2.01707	2.08803	2.09488	2.10367	2.08216	2.0884	1.97936	2.0158	2.01027	2.05658	2.04552	2.14275	2.17513	2.21379	2.2201	2.21956	2.29218	2.31774	2.34361	2.41494	2.45224	2.53653	2.64693	2.67551	2.75595	2.83705	2.87827	2.95966	2.95547	3.02992	2.95664	2.83761	2.75631	2.69353	2.62011	2.53421
1.59397	1.57966	1.58879	1.60747	1.57594	1.72246	1.74134	1.75054	1.82539	1.85774	1.88837	1.95527	1.94834	1.99108	2.01421	2.08508	2.09191	2.1007	2.07921	2.08544	1.97656	2.01295	2.00743	2.05367	2.04263	2.13972	2.17205	2.21065	2.21695	2.21642	2.28894	2.31446	2.34029	2.41152	2.44876	2.53293	2.64318	2.67172	2.75205	2.83303	2.87419	2.95547	2.95128	3.02563	2.95245	2.83359	2.75241	2.68972	2.6164	2.53062
1.63412	1.61946	1.62881	1.64796	1.61564	1.76585	1.7852	1.79463	1.87137	1.90454	1.93594	2.00452	1.99742	2.04123	2.06495	2.1376	2.14461	2.15361	2.13159	2.13797	2.02635	2.06365	2.05799	2.1054	2.09408	2.19362	2.22676	2.26634	2.2728	2.27225	2.34659	2.37276	2.39924	2.47227	2.51045	2.59674	2.70977	2.73902	2.82137	2.90439	2.94659	3.02992	3.02563	3.10184	3.02682	2.90497	2.82174	2.75748	2.68231	2.59437
1.5946	1.58029	1.58941	1.6081	1.57656	1.72314	1.74203	1.75123	1.82611	1.85848	1.88912	1.95604	1.94911	1.99187	2.01501	2.0859	2.09274	2.10153	2.08004	2.08627	1.97734	2.01375	2.00822	2.05448	2.04344	2.14056	2.17291	2.21153	2.21783	2.2173	2.28984	2.31537	2.34122	2.41247	2.44973	2.53394	2.64423	2.67278	2.75314	2.83415	2.87533	2.95664	2.95245	3.02682	2.95362	2.83471	2.7535	2.69079	2.61744	2.53163
1.5304	1.51667	1.52543	1.54337	1.51309	1.65377	1.6719	1.68073	1.75259	1.78366	1.81307	1.8773	1.87064	1.91168	1.93389	2.00193	2.00849	2.01692	1.9963	2.00228	1.89773	1.93267	1.92737	1.97177	1.96117	2.05439	2.08543	2.12249	2.12854	2.12803	2.19766	2.22216	2.24696	2.31535	2.35111	2.43192	2.53778	2.56517	2.6423	2.72005	2.75957	2.83761	2.83359	2.90497	2.83471	2.72059	2.64265	2.58246	2.51206	2.42971
1.48656	1.47322	1.48173	1.49915	1.46975	1.60639	1.624	1.63258	1.70239	1.73256	1.76112	1.82351	1.81705	1.85691	1.87849	1.94457	1.95095	1.95914	1.93911	1.94492	1.84337	1.87731	1.87216	1.91529	1.90499	1.99553	2.02568	2.06169	2.06756	2.06707	2.1347	2.1585	2.18259	2.24902	2.28375	2.36225	2.46507	2.49169	2.5666	2.64213	2.68051	2.75631	2.75241	2.82174	2.7535	2.64265	2.56694	2.50847	2.44009	2.3601
1.4527	1.43966	1.44798	1.465	1.43627	1.56981	1.58701	1.59539	1.66361	1.6931	1.72101	1.78198	1.77566	1.81462	1.8357	1.90028	1.90651	1.91452	1.89494	1.90062	1.80138	1.83455	1.82952	1.87166	1.8616	1.95008	1.97955	2.01473	2.02047	2.01998	2.08608	2.10933	2.13288	2.19779	2.23174	2.30845	2.40893	2.43493	2.50814	2.58195	2.61946	2.69353	2.68972	2.75748	2.69079	2.58246	2.50847	2.45134	2.38452	2.30634
1.4131	1.40042	1.40851	1.42507	1.39712	1.52701	1.54375	1.5519	1.61826	1.64694	1.6741	1.7334	1.72726	1.76515	1.78566	1.84848	1.85454	1.86233	1.84329	1.84881	1.75228	1.78454	1.77964	1.82064	1.81085	1.89692	1.92558	1.95981	1.96539	1.96492	2.02921	2.05183	2.07474	2.13788	2.1709	2.24552	2.34326	2.36856	2.43977	2.51157	2.54806	2.62011	2.6164	2.68231	2.61744	2.51206	2.44009	2.38452	2.31952	2.24347
1.36677	1.35451	1.36233	1.37835	1.35132	1.47695	1.49314	1.50102	1.56521	1.59295	1.61921	1.67658	1.67063	1.70728	1.72712	1.78788	1.79374	1.80127	1.78286	1.7882	1.69483	1.72603	1.7213	1.76095	1.75148	1.83473	1.86245	1.89556	1.90096	1.9005	1.96268	1.98457	2.00672	2.06779	2.09973	2.1719	2.26644	2.29091	2.35979	2.42923	2.46452	2.53421	2.53062	2.59437	2.53163	2.42971	2.3601	2.30634	2.24347	2.16992
1.33971	1.32768	1.33535	1.35105	1.32456	1.4477	1.46357	1.4713	1.53421	1.56141	1.58715	1.64338	1.63755	1.67347	1.69292	1.75248	1.75822	1.7656	1.74755	1.75278	1.66127	1.69185	1.68721	1.72608	1.7168	1.7984	1.82557	1.85802	1.86332	1.86287	1.92382	1.94527	1.96698	2.02685	2.05815	2.12889	2.22156	2.24554	2.31305	2.38112	2.41572	2.48403	2.48051	2.54299	2.48149	2.38159	2.31336	2.26067	2.19905	2.12695
1.30382	1.29212	1.29959	1.31487	1.28908	1.40893	1.42437	1.43189	1.49312	1.51959	1.54464	1.59936	1.59369	1.62865	1.64757	1.70554	1.71113	1.71831	1.70074	1.70584	1.61677	1.64654	1.64202	1.67985	1.67082	1.75023	1.77668	1.80826	1.81341	1.81297	1.87229	1.89316	1.9143	1.97256	2.00303	2.07188	2.16206	2.1854	2.2511	2.31735	2.35101	2.4175	2.41407	2.47488	2.41503	2.3178	2.2514	2.20012	2.14015	2.06999
1.25342	1.24218	1.24935	1.26404	1.23925	1.35447	1.36931	1.37654	1.4354	1.46085	1.48493	1.53754	1.53208	1.56569	1.58389	1.63961	1.64499	1.65189	1.635	1.6399	1.55427	1.58289	1.57855	1.61491	1.60623	1.68258	1.708	1.73836	1.74331	1.74289	1.79992	1.81998	1.8403	1.89631	1.9256	1.99179	2.07848	2.10092	2.16409	2.22777	2.26013	2.32405	2.32076	2.37922	2.32167	2.22821	2.16437	2.11508	2.05742	1.98997
1.21954	1.2086	1.21557	1.22987	1.20575	1.31785	1.33229	1.33933	1.3966	1.42135	1.44479	1.49597	1.49067	1.52337	1.54107	1.59529	1.60052	1.60724	1.5908	1.59557	1.51226	1.5401	1.53588	1.57126	1.56281	1.63709	1.66183	1.69136	1.69618	1.69577	1.75126	1.77078	1.79055	1.84505	1.87354	1.93794	2.02229	2.04412	2.10558	2.16754	2.19903	2.26122	2.25802	2.3149	2.25891	2.16797	2.10586	2.0579	2.0018	1.93617
1.18169	1.17108	1.17785	1.1917	1.16832	1.27695	1.29094	1.29776	1.35325	1.37724	1.39994	1.44954	1.4444	1.47608	1.49324	1.54577	1.55084	1.55735	1.54142	1.54604	1.46532	1.4923	1.4882	1.52249	1.5143	1.58628	1.61024	1.63887	1.64354	1.64314	1.6969	1.71582	1.73497	1.78778	1.81539	1.87779	1.95952	1.98068	2.04023	2.10026	2.13078	2.19103	2.18793	2.24305	2.1888	2.10068	2.0405	1.99402	1.93967	1.87608
1.18083	1.17024	1.17699	1.19083	1.16748	1.27602	1.29001	1.29682	1.35227	1.37624	1.39893	1.44849	1.44335	1.47502	1.49216	1.54465	1.54972	1.55622	1.54031	1.54492	1.46426	1.49122	1.48713	1.52139	1.51321	1.58513	1.60908	1.63768	1.64235	1.64195	1.69567	1.71458	1.73372	1.78649	1.81408	1.87643	1.95811	1.97925	2.03875	2.09875	2.12924	2.18945	2.18635	2.24142	2.18722	2.09916	2.03902	1.99258	1.93826	1.87472
1.13795	1.12774	1.13425	1.14759	1.12508	1.22968	1.24316	1.24972	1.30316	1.32626	1.34812	1.39588	1.39093	1.42145	1.43797	1.48856	1.49344	1.49971	1.48437	1.48882	1.41108	1.43706	1.43312	1.46613	1.45825	1.52756	1.55064	1.5782	1.5827	1.58232	1.63409	1.65231	1.67075	1.72161	1.74819	1.80828	1.88699	1.90736	1.96471	2.02253	2.05191	2.10993	2.10695	2.16002	2.10778	2.02293	1.96497	1.92022	1.86787	1.80663
1.16818	1.1577	1.16438	1.17807	1.15497	1.26235	1.27619	1.28292	1.33778	1.36149	1.38394	1.43297	1.42789	1.45921	1.47617	1.5281	1.53311	1.53955	1.52381	1.52837	1.44857	1.47524	1.47119	1.50509	1.49699	1.56815	1.59184	1.62013	1.62475	1.62436	1.67751	1.69621	1.71514	1.76734	1.79464	1.85633	1.93713	1.95804	2.01691	2.07626	2.10642	2.16599	2.16292	2.21741	2.16378	2.07667	2.01718	1.97123	1.9175	1.85463
1.14086	1.13063	1.13716	1.15053	1.12796	1.23283	1.24634	1.25293	1.3065	1.32966	1.35158	1.39946	1.3945	1.42509	1.44165	1.49237	1.49726	1.50355	1.48817	1.49263	1.4147	1.44075	1.43679	1.46989	1.46199	1.53148	1.55462	1.58225	1.58676	1.58638	1.63828	1.65655	1.67504	1.72602	1.75268	1.81292	1.89183	1.91225	1.96975	2.02771	2.05717	2.11534	2.11235	2.16556	2.11318	2.02811	1.97001	1.92514	1.87266	1.81127
1.15787	1.14748	1.1541	1.16767	1.14477	1.2512	1.26492	1.2716	1.32597	1.34947	1.37172	1.42032	1.41528	1.44633	1.46313	1.51461	1.51958	1.52596	1.51035	1.51488	1.43578	1.46222	1.4582	1.4918	1.48377	1.5543	1.57779	1.60583	1.61041	1.61002	1.66269	1.68123	1.7	1.75174	1.77879	1.83994	1.92002	1.94075	1.9991	2.05793	2.08783	2.14687	2.14383	2.19783	2.14468	2.05833	1.99937	1.95383	1.90057	1.83826
1.12988	1.11974	1.12621	1.13945	1.1171	1.22096	1.23434	1.24086	1.29392	1.31686	1.33857	1.38599	1.38107	1.41137	1.42777	1.478	1.48285	1.48907	1.47385	1.47826	1.40108	1.42687	1.42296	1.45574	1.44791	1.51673	1.53965	1.56702	1.57148	1.5711	1.62251	1.6406	1.65891	1.7094	1.7358	1.79547	1.87362	1.89384	1.95078	2.00819	2.03736	2.09498	2.09201	2.14471	2.09284	2.00858	1.95104	1.9066	1.85463	1.79383
1.13217	1.12201	1.12849	1.14176	1.11936	1.22343	1.23684	1.24337	1.29654	1.31952	1.34128	1.38879	1.38387	1.41423	1.43066	1.48099	1.48585	1.49209	1.47683	1.48125	1.40391	1.42976	1.42584	1.45869	1.45084	1.5198	1.54277	1.57019	1.57466	1.57428	1.62579	1.64392	1.66227	1.71286	1.73931	1.7991	1.87741	1.89767	1.95473	2.01225	2.04149	2.09922	2.09624	2.14905	2.09707	2.01265	1.95499	1.91046	1.85838	1.79746
1.07768	1.06801	1.07418	1.08681	1.06549	1.16456	1.17732	1.18354	1.23414	1.25602	1.27673	1.32196	1.31727	1.34617	1.36181	1.40972	1.41434	1.42028	1.40576	1.40997	1.33635	1.36095	1.35722	1.38849	1.38102	1.44666	1.46852	1.49462	1.49888	1.49852	1.54755	1.5648	1.58227	1.63043	1.65561	1.71252	1.78705	1.80635	1.86066	1.91541	1.94324	1.99819	1.99536	2.04562	1.99615	1.91579	1.8609	1.81852	1.76895	1.71095
1.06637	1.0568	1.0629	1.0754	1.05431	1.15233	1.16496	1.17111	1.22119	1.24283	1.26332	1.30808	1.30344	1.33204	1.34751	1.39492	1.39949	1.40537	1.391	1.39517	1.32232	1.34667	1.34297	1.37391	1.36652	1.43147	1.4531	1.47893	1.48315	1.48279	1.5313	1.54838	1.56566	1.61331	1.63823	1.69454	1.7683	1.78739	1.84113	1.8953	1.92284	1.97721	1.97441	2.02415	1.9752	1.89568	1.84137	1.79943	1.75038	1.69299
1.01794	1.0088	1.01463	1.02656	1.00643	1.1	1.11205	1.11793	1.16573	1.18639	1.20595	1.24867	1.24425	1.27154	1.28632	1.33157	1.33594	1.34154	1.32783	1.3318	1.26227	1.28551	1.28198	1.31151	1.30446	1.36646	1.38711	1.41177	1.41579	1.41545	1.46176	1.47806	1.49455	1.54004	1.56383	1.61758	1.68799	1.70621	1.75751	1.80923	1.83551	1.88742	1.88475	1.93222	1.88549	1.80959	1.75774	1.71771	1.67088	1.6161
0.975158	0.966407	0.971988	0.983418	0.96413	1.05377	1.06532	1.07094	1.11674	1.13653	1.15527	1.1962	1.19195	1.2181	1.23226	1.27561	1.27979	1.28516	1.27202	1.27583	1.20922	1.23148	1.2281	1.2564	1.24964	1.30904	1.32882	1.35243	1.35629	1.35596	1.40033	1.41594	1.43174	1.47532	1.49811	1.5496	1.61705	1.63451	1.68365	1.73319	1.75837	1.8081	1.80554	1.85102	1.80625	1.73354	1.68387	1.64552	1.60066	1.54819
0.897692	0.889636	0.894774	0.905296	0.88754	0.970058	0.980689	0.985868	1.02802	1.04625	1.06349	1.10117	1.09727	1.12134	1.13437	1.17428	1.17813	1.18307	1.17097	1.17448	1.11316	1.13365	1.13054	1.15659	1.15037	1.20505	1.22326	1.245	1.24855	1.24824	1.28909	1.30346	1.31801	1.35812	1.3791	1.4265	1.48859	1.50466	1.5499	1.59551	1.61869	1.66446	1.66211	1.70398	1.66276	1.59582	1.55011	1.5148	1.47351	1.4252
0.827584	0.820157	0.824894	0.834594	0.818225	0.894298	0.904099	0.908873	0.947737	0.964536	0.980437	1.01517	1.01157	1.03376	1.04577	1.08257	1.08612	1.09068	1.07952	1.08276	1.02622	1.04512	1.04225	1.06626	1.06053	1.11094	1.12772	1.14777	1.15104	1.15076	1.18841	1.20166	1.21507	1.25205	1.27139	1.31509	1.37233	1.38715	1.42886	1.4709	1.49227	1.53447	1.5323	1.5709	1.53291	1.47119	1.42905	1.3965	1.35843	1.31389
0.801963	0.794767	0.799356	0.808756	0.792894	0.866612	0.87611	0.880736	0.918397	0.934675	0.950085	0.983743	0.980255	1.00176	1.0134	1.04905	1.05249	1.05691	1.0461	1.04924	0.994453	1.01276	1.00998	1.03325	1.02769	1.07654	1.09281	1.11223	1.1154	1.11513	1.15162	1.16446	1.17746	1.21329	1.23203	1.27438	1.32985	1.34421	1.38462	1.42537	1.44607	1.48697	1.48486	1.52227	1.48545	1.42565	1.3848	1.35326	1.31637	1.27322
0.775804	0.768842	0.773282	0.782375	0.76703	0.838344	0.847532	0.852007	0.88844	0.904187	0.919094	0.951654	0.94828	0.969083	0.980343	1.01483	1.01816	1.02243	1.01198	1.01501	0.962015	0.979727	0.97704	0.999548	0.994172	1.04143	1.05716	1.07595	1.07902	1.07876	1.11405	1.12647	1.13905	1.17372	1.19184	1.23281	1.28647	1.30036	1.33946	1.37887	1.39891	1.43846	1.43643	1.47261	1.437	1.37914	1.33963	1.30912	1.27343	1.23169
0.733694	0.72711	0.731309	0.739909	0.725397	0.79284	0.801529	0.805762	0.840216	0.855109	0.869207	0.9	0.896808	0.916482	0.927131	0.95975	0.962896	0.966938	0.957051	0.959918	0.909798	0.926549	0.924007	0.945294	0.94021	0.984899	0.999781	1.01755	1.02045	1.02021	1.05358	1.06533	1.07722	1.11001	1.12715	1.1659	1.21664	1.22978	1.26675	1.30403	1.32297	1.36039	1.35846	1.39268	1.359	1.30429	1.26692	1.23806	1.20431	1.16483
0.739646	0.733009	0.737242	0.745911	0.731282	0.799271	0.808031	0.812298	0.847032	0.862046	0.876258	0.907301	0.904084	0.923917	0.934652	0.967535	0.970707	0.974782	0.964815	0.967705	0.917178	0.934065	0.931503	0.952962	0.947837	0.992889	1.00789	1.02581	1.02873	1.02848	1.06213	1.07397	1.08596	1.11901	1.1363	1.17535	1.22651	1.23975	1.27703	1.31461	1.33371	1.37142	1.36948	1.40398	1.37002	1.31487	1.2772	1.24811	1.21408	1.17428
0.725286	0.718777	0.722928	0.731429	0.717083	0.783753	0.792343	0.796527	0.830587	0.845309	0.859245	0.889685	0.88653	0.905979	0.916506	0.94875	0.95186	0.955856	0.946082	0.948916	0.89937	0.91593	0.913417	0.93446	0.929434	0.973611	0.988322	1.00589	1.00876	1.00851	1.04151	1.05312	1.06488	1.09729	1.11423	1.15253	1.2027	1.21568	1.25223	1.28908	1.30781	1.34479	1.34289	1.37672	1.34342	1.28934	1.2524	1.22387	1.19051	1.15148
0.703725	0.69741	0.701437	0.709686	0.695766	0.760454	0.768788	0.772848	0.805896	0.82018	0.833702	0.863237	0.860176	0.879047	0.88926	0.920546	0.923564	0.927442	0.917958	0.920707	0.872635	0.888702	0.886264	0.906681	0.901805	0.944669	0.958942	0.975987	0.978769	0.978532	1.01055	1.02181	1.03322	1.06467	1.08111	1.11827	1.16695	1.17954	1.21501	1.25076	1.26893	1.30482	1.30297	1.33579	1.30349	1.25101	1.21517	1.18749	1.15512	1.11725
0.664072	0.658113	0.661913	0.669697	0.656562	0.717605	0.72547	0.729301	0.760486	0.773965	0.786725	0.814596	0.811708	0.829515	0.839153	0.868676	0.871524	0.875183	0.866234	0.868828	0.823464	0.838626	0.836326	0.855592	0.850991	0.891439	0.904909	0.920993	0.923618	0.923395	0.953607	0.964239	0.975002	1.00468	1.02019	1.05526	1.10119	1.11308	1.14655	1.18029	1.19743	1.23129	1.22955	1.26052	1.23004	1.18052	1.1467	1.12058	1.09003	1.0543
0.656622	0.65073	0.654488	0.662184	0.649197	0.709555	0.717331	0.721119	0.751955	0.765283	0.7779	0.805458	0.802602	0.820209	0.82974	0.858931	0.861747	0.865365	0.856516	0.859082	0.814227	0.829218	0.826944	0.845994	0.841444	0.881439	0.894757	0.910661	0.913257	0.913036	0.94291	0.953422	0.964064	0.993407	1.00875	1.04342	1.08884	1.10059	1.13368	1.16704	1.184	1.21748	1.21576	1.24638	1.21624	1.16728	1.13383	1.10801	1.07781	1.04247
0.62664	0.621016	0.624603	0.631948	0.619553	0.677155	0.684576	0.688192	0.717619	0.730339	0.742379	0.768679	0.765954	0.782757	0.791852	0.819711	0.822398	0.825851	0.817406	0.819854	0.777047	0.791355	0.789184	0.807364	0.803022	0.841191	0.853901	0.869079	0.871556	0.871345	0.899854	0.909887	0.920043	0.948046	0.962688	0.995778	1.03912	1.05034	1.08192	1.11376	1.12994	1.16189	1.16024	1.18947	1.1607	1.11398	1.08206	1.05742	1.02859	0.994869
0.595133	0.589792	0.593198	0.600174	0.588403	0.643108	0.650157	0.65359	0.681538	0.693618	0.705053	0.730031	0.727442	0.743401	0.752039	0.778497	0.781049	0.784328	0.776308	0.778633	0.737978	0.751566	0.749505	0.766771	0.762647	0.798897	0.810968	0.825382	0.827735	0.827535	0.854611	0.864139	0.873785	0.900379	0.914285	0.945711	0.986875	0.997529	1.02752	1.05776	1.07313	1.10347	1.10191	1.12967	1.10234	1.05797	1.02766	1.00425	0.976875	0.944849
0.576082	0.570912	0.574209	0.580961	0.569567	0.622521	0.629344	0.632668	0.659721	0.671414	0.682483	0.706661	0.704156	0.719603	0.727965	0.753576	0.756046	0.75922	0.751457	0.753708	0.714355	0.727507	0.725512	0.742225	0.738234	0.773323	0.785007	0.79896	0.801238	0.801044	0.827253	0.836476	0.845813	0.871556	0.885017	0.915438	0.955283	0.965596	0.994628	1.0239	1.03877	1.06815	1.06663	1.0935	1.06706	1.0241	0.99476	0.972102	0.945603	0.914602
0.536245	0.531433	0.534502	0.540787	0.530181	0.579473	0.585824	0.588918	0.6141	0.624985	0.635289	0.657795	0.655463	0.669842	0.677625	0.701465	0.703765	0.706719	0.699493	0.701588	0.664956	0.677199	0.675342	0.6909	0.687184	0.719847	0.730723	0.743711	0.745831	0.745651	0.770048	0.778633	0.787324	0.811287	0.823817	0.852134	0.889224	0.898824	0.925848	0.953093	0.96694	0.994283	0.992876	1.01789	0.993268	0.953281	0.925971	0.90488	0.880214	0.851357
0.502255	0.497748	0.500622	0.506509	0.496575	0.542743	0.548692	0.551589	0.575175	0.58537	0.595021	0.616101	0.613916	0.627384	0.634674	0.657003	0.659157	0.661924	0.655155	0.657118	0.622808	0.634275	0.632535	0.647107	0.643627	0.674219	0.684406	0.696571	0.698557	0.698388	0.721238	0.729279	0.73742	0.759864	0.771599	0.798121	0.832861	0.841852	0.867163	0.892681	0.905651	0.931261	0.929942	0.953367	0.93031	0.892857	0.867278	0.847524	0.824421	0.797393
0.478054	0.473764	0.4765	0.482103	0.472647	0.516591	0.522253	0.52501	0.54746	0.557164	0.566349	0.586413	0.584334	0.597153	0.604091	0.625345	0.627395	0.630029	0.623586	0.625454	0.592797	0.603712	0.602056	0.615925	0.612613	0.641731	0.651428	0.663006	0.664896	0.664735	0.686485	0.694138	0.701887	0.723249	0.734419	0.759663	0.792729	0.801287	0.825378	0.849666	0.862011	0.886387	0.885132	0.907429	0.885482	0.849834	0.825488	0.806686	0.784696	0.75897
0.45221	0.448152	0.45074	0.45604	0.447096	0.488664	0.494019	0.496628	0.517864	0.527043	0.535732	0.554711	0.552744	0.56487	0.571434	0.591538	0.593477	0.595969	0.589875	0.591642	0.56075	0.571075	0.569508	0.582628	0.579495	0.607039	0.616211	0.627164	0.628951	0.628799	0.649373	0.656613	0.663942	0.68415	0.694716	0.718595	0.749873	0.757969	0.780758	0.803733	0.81541	0.838468	0.837281	0.858372	0.837612	0.803891	0.780861	0.763076	0.742275	0.71794
0.416209	0.412474	0.414856	0.419735	0.411503	0.449761	0.454691	0.457092	0.476637	0.485085	0.493083	0.510551	0.508741	0.519901	0.525942	0.544446	0.546231	0.548524	0.542915	0.544541	0.516109	0.525612	0.52417	0.536245	0.533361	0.558713	0.567155	0.577236	0.578881	0.578741	0.597677	0.60434	0.611086	0.629685	0.63941	0.661388	0.690176	0.697627	0.718602	0.739748	0.750496	0.771718	0.770626	0.790038	0.770931	0.739894	0.718697	0.702328	0.683182	0.660785
0.383257	0.379818	0.382012	0.386504	0.378923	0.414153	0.418692	0.420903	0.438901	0.44668	0.454045	0.47013	0.468463	0.47874	0.484303	0.501341	0.502985	0.505096	0.499932	0.501429	0.475248	0.483998	0.482671	0.49379	0.491134	0.514479	0.522252	0.531535	0.53305	0.532921	0.550358	0.556493	0.562705	0.579832	0.588787	0.609025	0.635534	0.642395	0.661709	0.681181	0.691078	0.71062	0.709614	0.727489	0.709895	0.681315	0.661797	0.646723	0.629094	0.608469
0.343211	0.340131	0.342095	0.346118	0.339329	0.370878	0.374942	0.376922	0.39304	0.400006	0.406601	0.421006	0.419513	0.428716	0.433697	0.448956	0.450428	0.452318	0.447693	0.449034	0.425589	0.433425	0.432236	0.442193	0.439815	0.46072	0.467682	0.475994	0.477351	0.477236	0.49285	0.498345	0.503908	0.519245	0.527264	0.545388	0.569126	0.57527	0.592566	0.610004	0.618866	0.636367	0.635466	0.651473	0.635717	0.610124	0.592645	0.579147	0.563359	0.54489
0.321098	0.318217	0.320054	0.323818	0.317467	0.346983	0.350785	0.352638	0.367717	0.374235	0.380404	0.393881	0.392484	0.401094	0.405755	0.42003	0.421407	0.423176	0.418849	0.420104	0.398169	0.4055	0.404388	0.413704	0.411479	0.431037	0.43755	0.445327	0.446596	0.446488	0.461097	0.466237	0.471442	0.48579	0.493293	0.510249	0.532458	0.538207	0.554388	0.570702	0.578994	0.595367	0.594524	0.6095	0.594759	0.570815	0.554462	0.541833	0.527063	0.509783
0.271289	0.268854	0.270407	0.273587	0.268221	0.293158	0.296371	0.297936	0.310676	0.316183	0.321396	0.332782	0.331602	0.338876	0.342814	0.354875	0.356038	0.357533	0.353877	0.354937	0.336405	0.342598	0.341659	0.349529	0.34765	0.364174	0.369676	0.376247	0.37732	0.377228	0.389571	0.393914	0.398311	0.410434	0.416773	0.431099	0.449863	0.45472	0.468391	0.482174	0.48918	0.503013	0.502301	0.514954	0.502499	0.482269	0.468453	0.457783	0.445304	0.430705
0.20528	0.203438	0.204613	0.207019	0.202958	0.221828	0.224259	0.225444	0.235084	0.23925	0.243195	0.25181	0.250918	0.256422	0.259402	0.268528	0.269408	0.270539	0.267773	0.268575	0.254552	0.259239	0.258527	0.264483	0.263061	0.275564	0.279728	0.2847	0.285511	0.285443	0.294782	0.298068	0.301396	0.310569	0.315365	0.326205	0.340404	0.344079	0.354424	0.364853	0.370154	0.380621	0.380083	0.389657	0.380233	0.364925	0.354471	0.346397	0.336954	0.325908
0.168951	0.167435	0.168402	0.170382	0.167041	0.182571	0.184572	0.185546	0.193481	0.19691	0.200156	0.207247	0.206512	0.211043	0.213495	0.221006	0.221731	0.222661	0.220385	0.221045	0.209503	0.213361	0.212775	0.217677	0.216507	0.226797	0.230224	0.234316	0.234984	0.234927	0.242614	0.245319	0.248057	0.255607	0.259555	0.268476	0.280162	0.283187	0.291701	0.300285	0.304648	0.313262	0.312819	0.320699	0.312943	0.300344	0.29174	0.285095	0.277323	0.268231
0.143331	0.142044	0.142865	0.144545	0.14171	0.154885	0.156582	0.157409	0.16414	0.16705	0.169804	0.175819	0.175196	0.179039	0.18112	0.187492	0.188106	0.188896	0.186964	0.187524	0.177733	0.181006	0.180509	0.184668	0.183674	0.192405	0.195312	0.198783	0.19935	0.199302	0.205823	0.208117	0.210441	0.216846	0.220195	0.227763	0.237677	0.240243	0.247466	0.254748	0.258449	0.265758	0.265381	0.272066	0.265486	0.254798	0.247499	0.241862	0.235269	0.227555
0.11842	0.117357	0.118035	0.119423	0.11708	0.127966	0.129368	0.130051	0.135612	0.138016	0.140292	0.145262	0.144747	0.147922	0.149641	0.154905	0.155413	0.156066	0.15447	0.154932	0.146843	0.149547	0.149136	0.152572	0.151752	0.158965	0.161366	0.164235	0.164703	0.164663	0.17005	0.171946	0.173866	0.179157	0.181924	0.188178	0.196368	0.198488	0.204456	0.210473	0.21353	0.219569	0.219258	0.224781	0.219345	0.210514	0.204483	0.199826	0.194379	0.188006
0.0983567	0.0974741	0.098037	0.0991898	0.0972444	0.106286	0.10745	0.108018	0.112637	0.114633	0.116523	0.120651	0.120223	0.122861	0.124288	0.128661	0.129083	0.129625	0.128299	0.128683	0.121965	0.12421	0.123869	0.126723	0.126042	0.132032	0.134027	0.13641	0.136798	0.136765	0.14124	0.142815	0.144409	0.148804	0.151102	0.156296	0.163099	0.16486	0.169817	0.174814	0.177354	0.182369	0.182111	0.186698	0.182183	0.174848	0.169839	0.165971	0.161447	0.156154
0.089383	0.0885808	0.0890924	0.0901401	0.0883721	0.0965884	0.0976469	0.0981626	0.10236	0.104174	0.105892	0.109643	0.109254	0.111651	0.112949	0.116922	0.117306	0.117798	0.116594	0.116943	0.110837	0.112878	0.112568	0.115161	0.114542	0.119986	0.121799	0.123964	0.124317	0.124287	0.128354	0.129785	0.131234	0.135228	0.137316	0.142036	0.148219	0.149819	0.154323	0.158864	0.161173	0.16573	0.165495	0.169664	0.165561	0.158896	0.154344	0.150828	0.146717	0.141907
0.0678485	0.0672397	0.067628	0.0684232	0.0670812	0.073318	0.0741215	0.074513	0.0776992	0.0790764	0.0803801	0.0832277	0.0829325	0.0847519	0.0857367	0.088753	0.089044	0.0894178	0.0885035	0.0887686	0.0841337	0.0856828	0.0854477	0.0874162	0.0869461	0.0910788	0.0924549	0.0940982	0.0943664	0.0943437	0.0974305	0.0985167	0.0996164	0.102648	0.104234	0.107816	0.112509	0.113724	0.117143	0.12059	0.122342	0.125802	0.125624	0.128788	0.125674	0.120614	0.117159	0.11449	0.111369	0.107718
0.0528178	0.0523438	0.0526461	0.0532652	0.0522205	0.0570756	0.0577011	0.0580058	0.0604862	0.0615583	0.0625732	0.0647899	0.0645602	0.0659765	0.0667431	0.0690913	0.0693178	0.0696088	0.068897	0.0691033	0.0654953	0.0667012	0.0665182	0.0680506	0.0676846	0.0709017	0.071973	0.0732523	0.0734611	0.0734434	0.0758463	0.0766919	0.077548	0.0799082	0.0811424	0.0839315	0.0875847	0.0885302	0.091192	0.0938755	0.0952394	0.0979325	0.0977939	0.100257	0.0978326	0.093894	0.0912041	0.0891268	0.0866972	0.0838549
0.0365914	0.0362631	0.0364725	0.0369014	0.0361776	0.0395412	0.0399745	0.0401856	0.041904	0.0426467	0.0433498	0.0448856	0.0447264	0.0457076	0.0462387	0.0478655	0.0480224	0.048224	0.0477309	0.0478738	0.0453742	0.0462096	0.0460829	0.0471445	0.046891	0.0491197	0.0498619	0.0507482	0.0508928	0.0508805	0.0525453	0.0531311	0.0537242	0.0553593	0.0562143	0.0581466	0.0606775	0.0613325	0.0631765	0.0650356	0.0659805	0.0678463	0.0677502	0.0694569	0.0677771	0.0650485	0.0631849	0.0617458	0.0600626	0.0580935
0.0269739	0.0267318	0.0268862	0.0272023	0.0266688	0.0291483	0.0294678	0.0296234	0.0308901	0.0314376	0.0319559	0.033088	0.0329707	0.033694	0.0340855	0.0352847	0.0354003	0.035549	0.0351854	0.0352908	0.0334482	0.0340641	0.0339706	0.0347532	0.0345663	0.0362093	0.0367564	0.0374097	0.0375163	0.0375073	0.0387345	0.0391663	0.0396035	0.0408089	0.0414391	0.0428635	0.0447292	0.0452121	0.0465714	0.0479419	0.0486384	0.0500138	0.049943	0.0512011	0.0499628	0.0479513	0.0465776	0.0455167	0.0442759	0.0428244
0.0177242	0.0175651	0.0176666	0.0178743	0.0175237	0.019153	0.0193629	0.0194651	0.0202975	0.0206572	0.0209978	0.0217417	0.0216646	0.0221399	0.0223971	0.0231851	0.0232611	0.0233588	0.0231199	0.0231892	0.0219784	0.0223831	0.0223217	0.0228359	0.0227131	0.0237926	0.0241521	0.0245814	0.0246515	0.0246455	0.0254519	0.0257357	0.0260229	0.026815	0.0272291	0.0281651	0.029391	0.0297083	0.0306015	0.031502	0.0319597	0.0328634	0.0328169	0.0336436	0.0328299	0.0315082	0.0306055	0.0299085	0.0290932	0.0281394
[truncated: 49 more columns]

## Sheet: Czech Republic
Household
4.64441	4.29517	4.16601	3.92874	3.83192	2.96055	2.91925	2.86974	2.81664	2.87533	1.4553	1.488	1.53986	1.67394	1.94691	0.492559	0.505262	0.525598	0.499338	0.53195	3.5445	3.5908	3.61433	3.63681	3.75177	5.08772	5.03758	5.41848	6.00424	6.2349	5.54966	5.88957	5.75968	5.90961	5.50635	3.8785	3.60405	3.48379	3.49947	3.24166	2.56071	2.61014	2.69427	2.79618	2.68287	0	0	0	0	0
4.29517	3.97528	3.79918	3.64204	3.54671	2.67977	2.62623	2.66547	2.56635	2.60045	1.37971	1.33978	1.43303	1.56571	1.8334	0.43014	0.44834	0.465017	0.463959	0.496831	3.21907	3.29759	3.40317	3.48901	3.35715	4.62194	4.6823	5.05058	5.63243	5.67069	5.23318	5.26837	5.50118	5.37805	5.08111	3.62119	3.35977	3.24002	3.10064	3.04026	2.38732	2.42612	2.46629	2.62567	2.4828	0	0	0	0	0
4.16601	3.79918	3.78128	3.57012	3.4661	2.64966	2.59629	2.55948	2.50053	2.52299	1.34556	1.29746	1.38528	1.53265	1.75492	0.443808	0.457867	0.476717	0.44444	0.470793	3.06753	3.13723	3.28524	3.30768	3.23477	4.57161	4.52723	4.85762	5.26471	5.51989	5.04042	5.20257	5.26898	5.26361	4.97388	3.44667	3.3137	3.12055	3.0741	2.96559	2.27897	2.38242	2.39672	2.50774	2.44144	0	0	0	0	0
3.92874	3.64204	3.57012	3.42388	3.19097	2.5837	2.46062	2.45414	2.35991	2.42599	1.24928	1.26143	1.29322	1.47458	1.648	0.396803	0.472019	0.437568	0.425552	0.452667	2.89793	2.97216	3.13645	3.16635	3.08946	4.37382	4.38683	4.551	5.02068	5.30743	4.71844	4.96489	5.01706	5.06629	4.75124	3.31661	3.12352	3.04537	2.90268	2.79207	2.19637	2.21501	2.34384	2.42781	2.33354	0	0	0	0	0
3.83192	3.54671	3.4661	3.19097	3.09167	2.37707	2.38104	2.31352	2.26218	2.36388	1.18495	1.20081	1.25474	1.45255	1.61814	0.391102	0.413406	0.420092	0.431978	0.44899	2.82088	2.93541	2.99779	3.09069	3.04177	4.06851	4.24419	4.46798	4.91296	4.99041	4.63078	4.76103	4.83502	4.87656	4.56602	3.19086	3.05544	2.86751	2.85081	2.65561	2.11069	2.158	2.23572	2.29559	2.29374	0	0	0	0	0
2.96055	2.67977	2.64966	2.5837	2.37707	3.20266	3.10456	3.11169	3.01978	3.07982	1.79397	1.81756	1.86896	2.11723	2.37025	0.627148	0.681378	0.677478	0.686169	0.738634	0.157247	0.155352	0.148499	0.156207	0.170488	4.04126	4.08221	4.39494	4.8482	5.02118	4.99609	5.19354	5.29372	5.27537	4.99187	3.15964	2.99671	2.92601	2.83832	2.70711	2.31084	2.36494	2.50094	2.55188	2.44062	1.75521	1.64846	1.65493	1.58771	1.78422
2.91925	2.62623	2.59629	2.46062	2.38104	3.10456	3.00914	3.0382	2.98698	3.05471	1.77072	1.80556	1.91201	2.11978	2.38401	0.611938	0.640613	0.676902	0.65651	0.712485	0.146122	0.157692	0.158194	0.160831	0.173906	3.88788	3.93106	4.22642	4.67144	4.89588	4.97373	5.02369	5.25593	5.21213	4.87838	3.17771	2.96778	2.87765	2.77809	2.65598	2.34334	2.3114	2.40051	2.43458	2.35218	1.72951	1.69965	1.63145	1.61678	1.7164
[truncated: 396 more rows]
[truncated: 50 more columns]

## Sheet: Germany
Household
[truncated: 383 more rows]
[truncated: 45 more columns]

## Sheet: Denmark
Household
[truncated: 403 more rows]
[truncated: 50 more columns]

## Sheet: Spain
Household
[truncated: 403 more rows]
[truncated: 50 more columns]

## Sheet: Estonia
Household
[truncated: 403 more rows]
[truncated: 50 more columns]

## Sheet: Finland
Household
[truncated: 403 more rows]
[truncated: 50 more columns]

## Sheet: France
Household
[truncated: 403 more rows]
[truncated: 50 more columns]

[truncated: 16 more sheets: United Kingdom, Greece, Hungary, Ireland, Italy, Lithuania, Luxembourg, Latvia, The Netherlands, Norway, Portugal, Romania, Slovakia, Slovenia, Sweden, Cyprus]
